# Supplementary material for: How useful are registered birth statistics for health and social policy? A global systematic assessment of the availability and quality of birth registration data
Source: Springer Nature journal article supplement (doi:10.1186/s12963-018-0180-6), 2018-12-01

# Albania

## VSPI-B

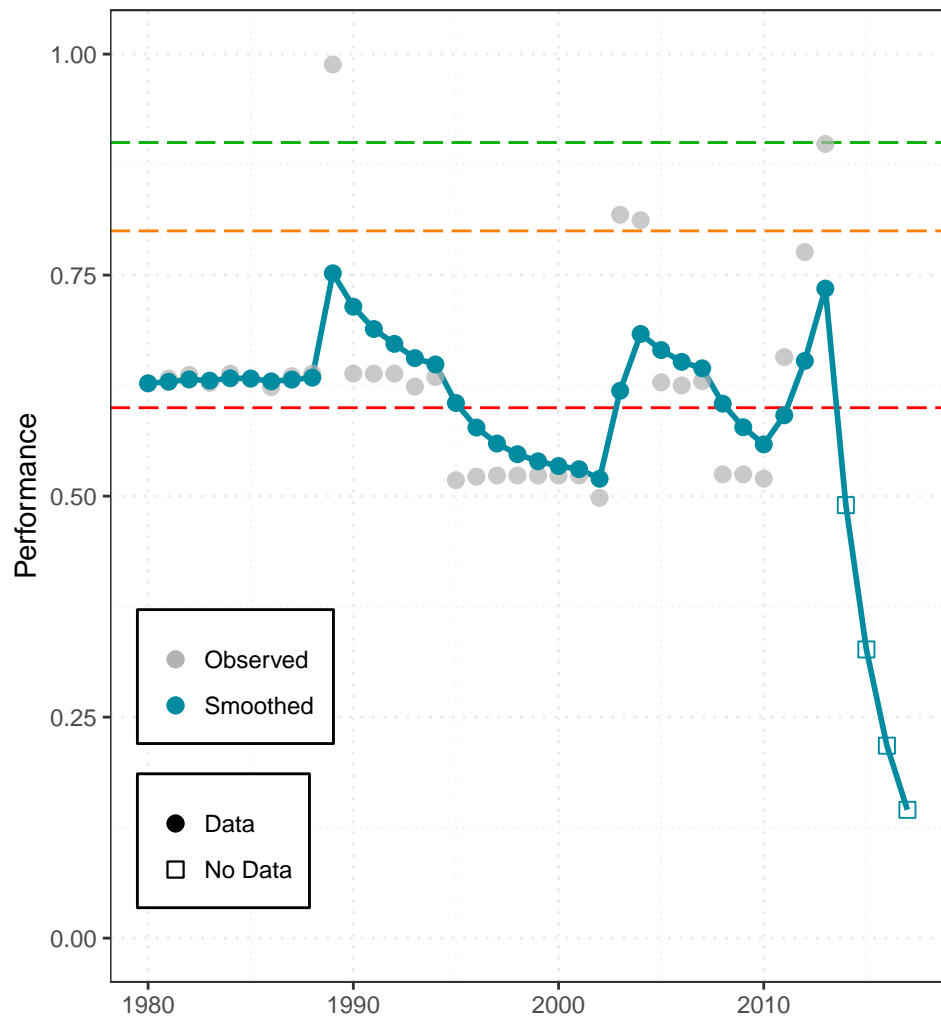

## Completeness

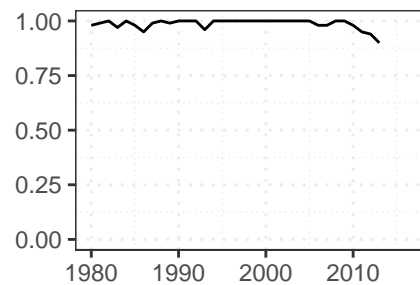

## Age Unspecified

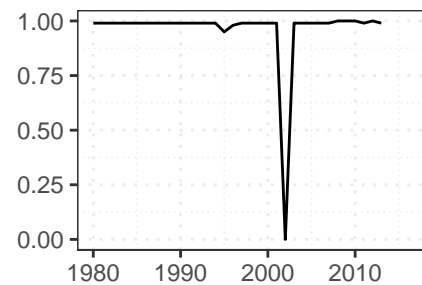

## Sex Unspecified

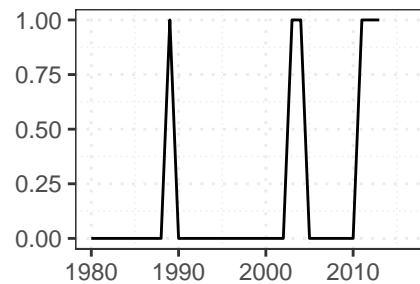

## Birth Order Unspecified

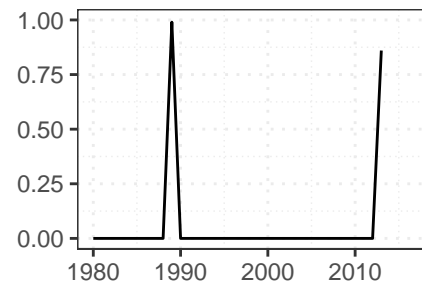

## Birth Weight Unspecified

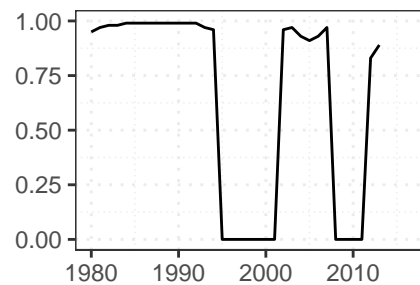

# Argentina

VSPI-B

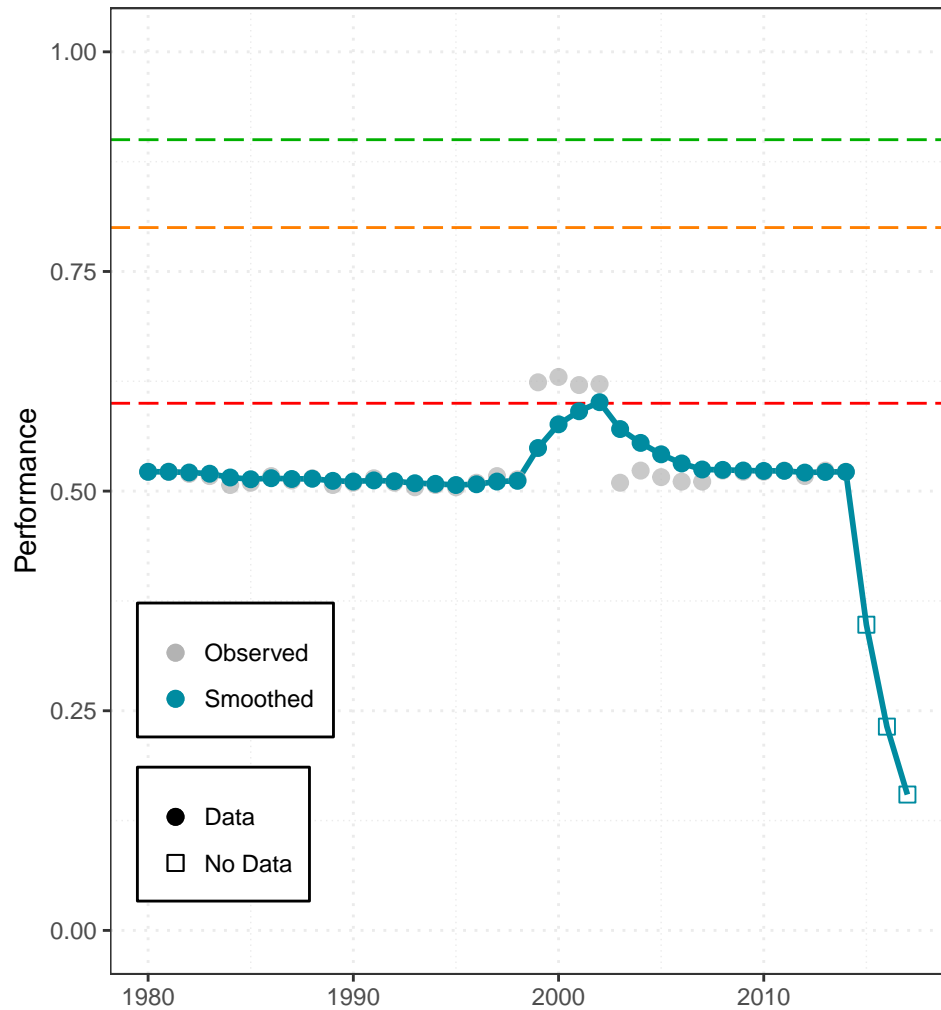

## Completeness

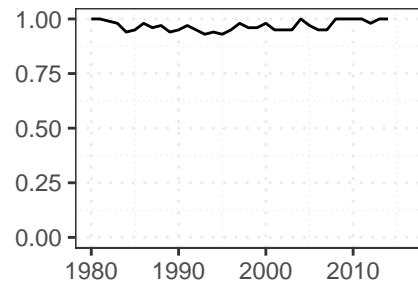

## Age Unspecified

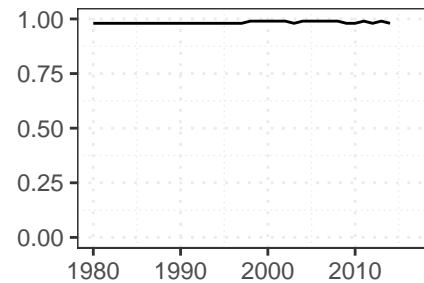

## Sex Unspecified

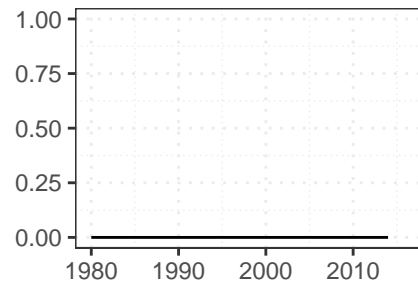

## Birth Order Unspecified

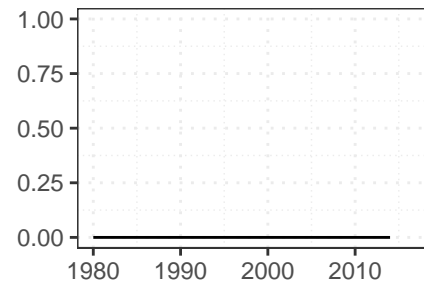

## Birth Weight Unspecified

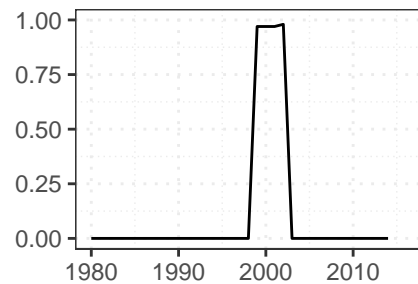

# Armenia

VSPI-B

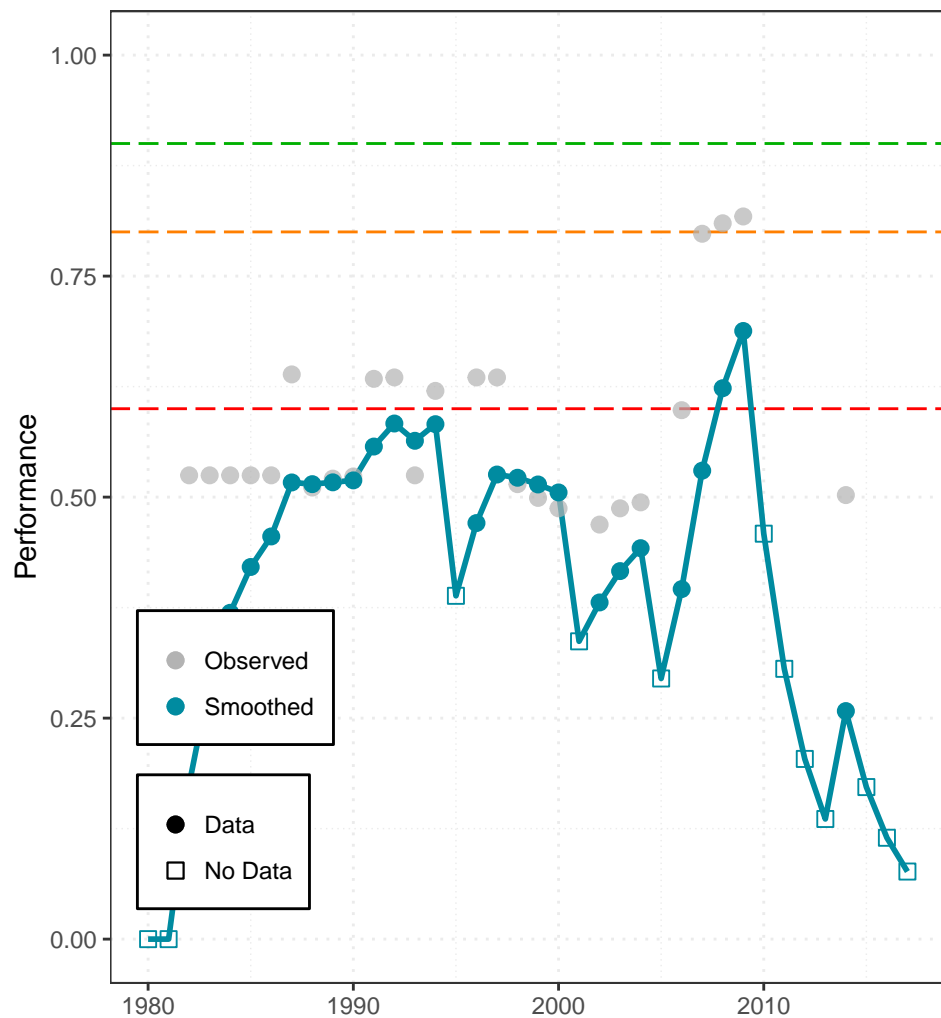

# Completeness

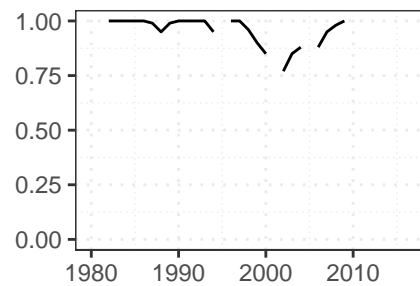

# Age Unspecified

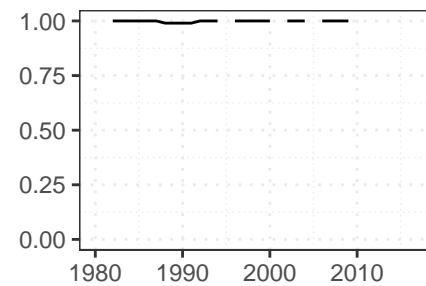

# Sex Unspecified

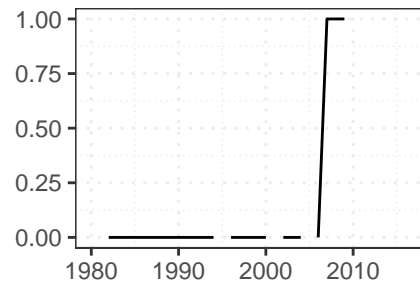

# Birth Order Unspecified

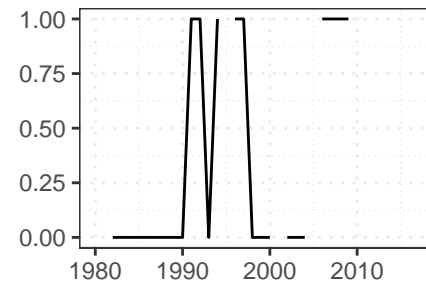

# Birth Weight Unspecified

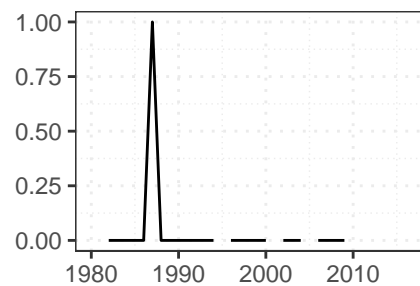

# Antigua and Barbuda

## VSPI-B

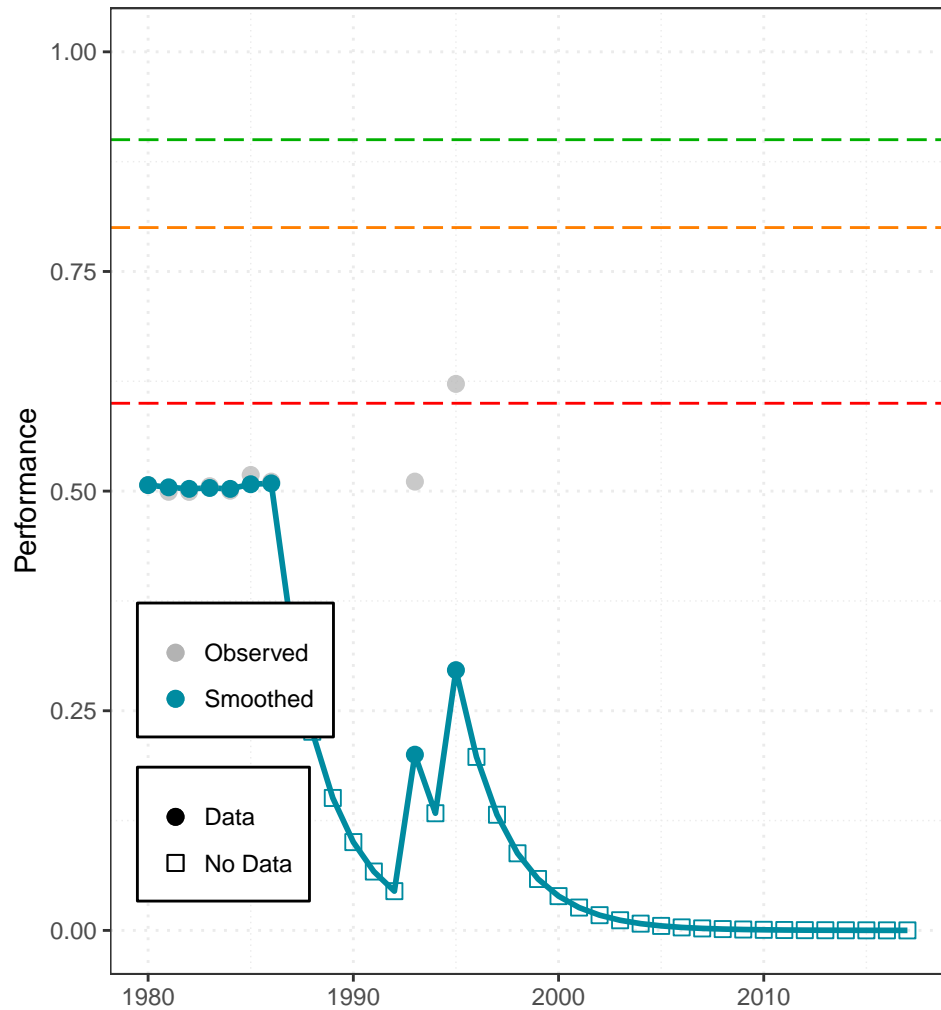

## Completeness

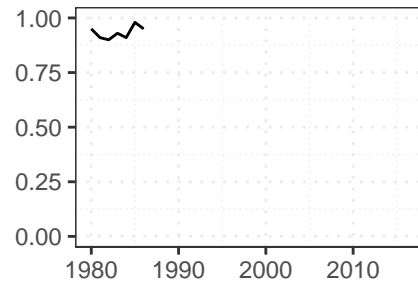

## Age Unspecified

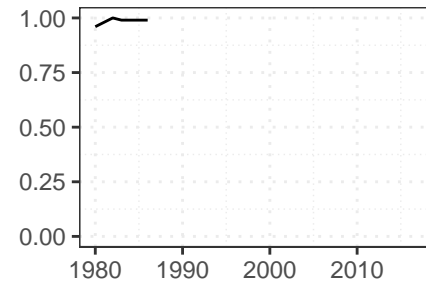

## Sex Unspecified

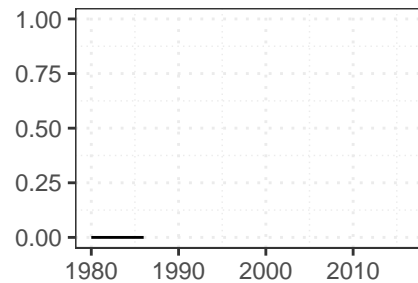

## Birth Order Unspecified

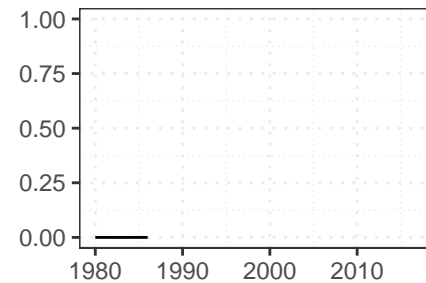

## Birth Weight Unspecified

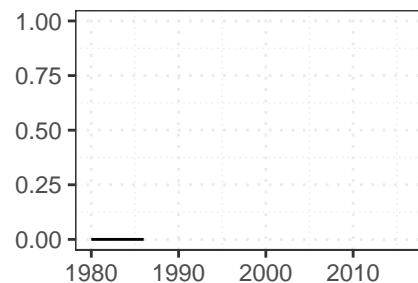

# Australia

VSPI-B

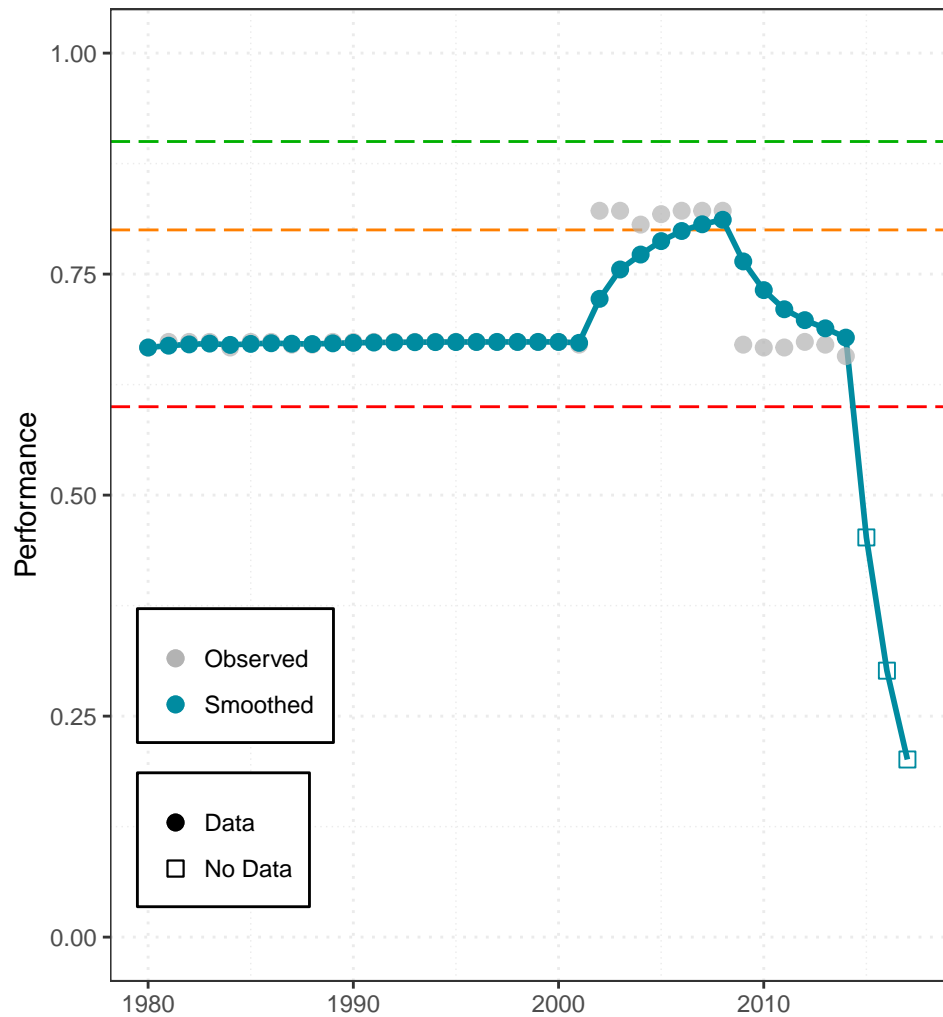

# Completeness

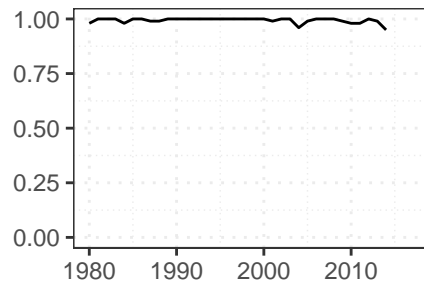

# Age Unspecified

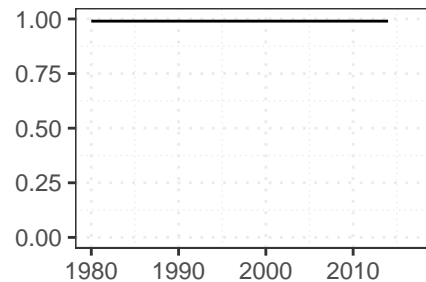

# Sex Unspecified

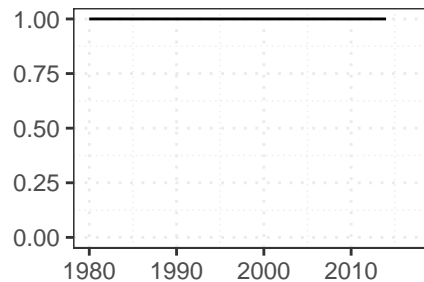

# Birth Order Unspecified

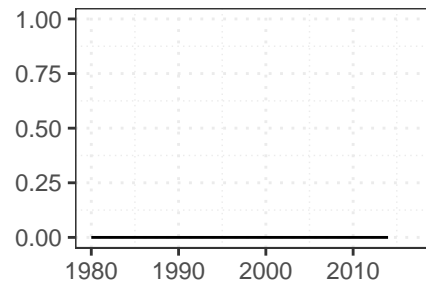

# Birth Weight Unspecified

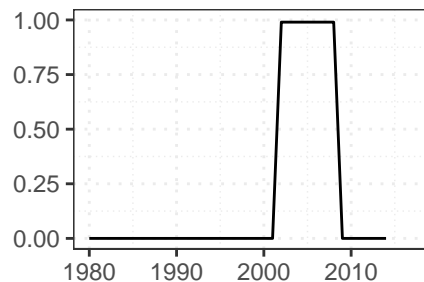

# Austria

## VSPI-B

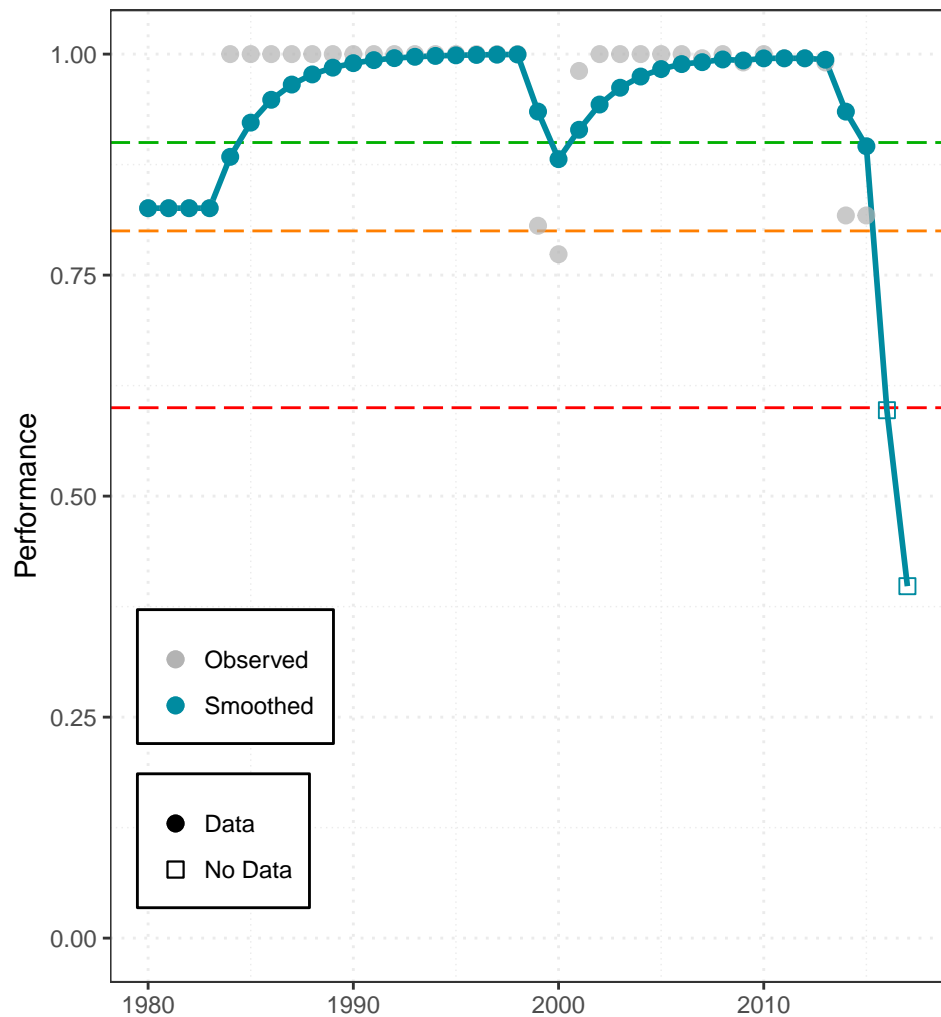

# Completeness

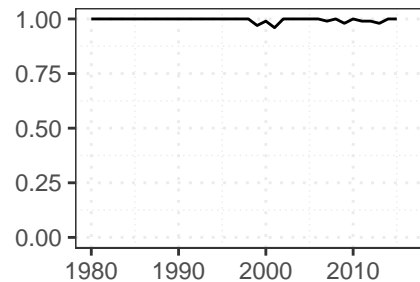

# Age Unspecified

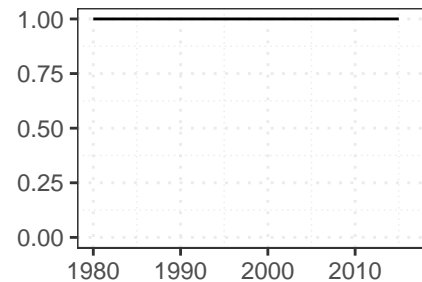

# Sex Unspecified

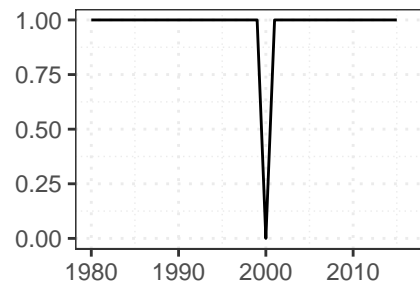

# Birth Order Unspecified

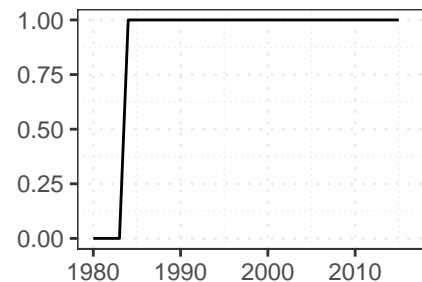

# Birth Weight Unspecified

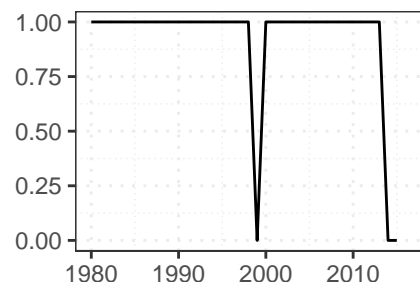

# Azerbaijan

VSPI-B

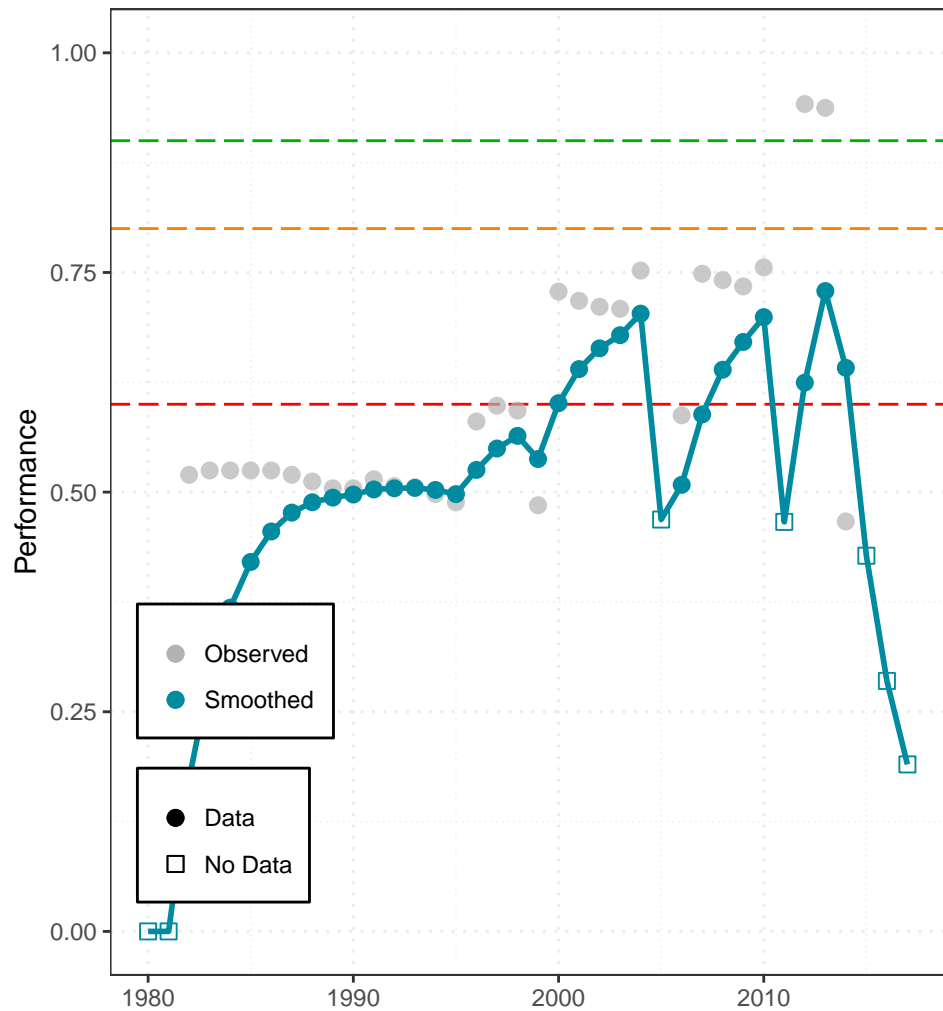

## Completeness

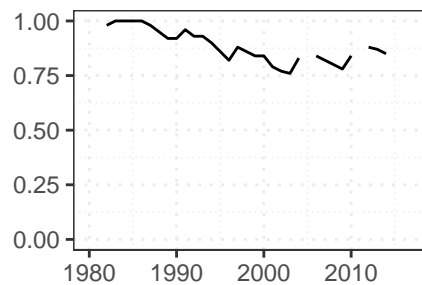

## Age Unspecified

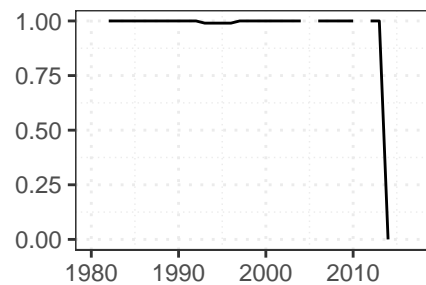

## Sex Unspecified

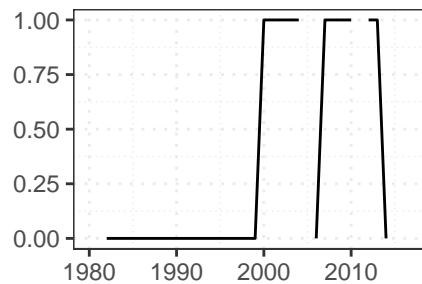

## Birth Order Unspecified

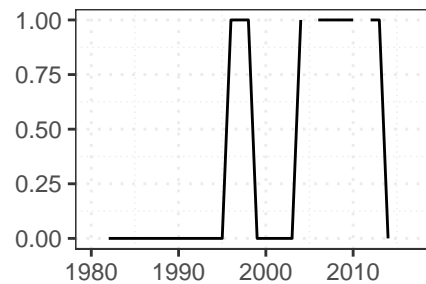

## Birth Weight Unspecified

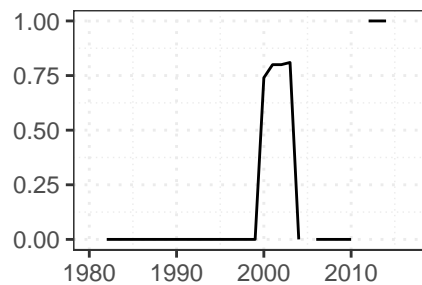

# Belgium

## VSPI-B

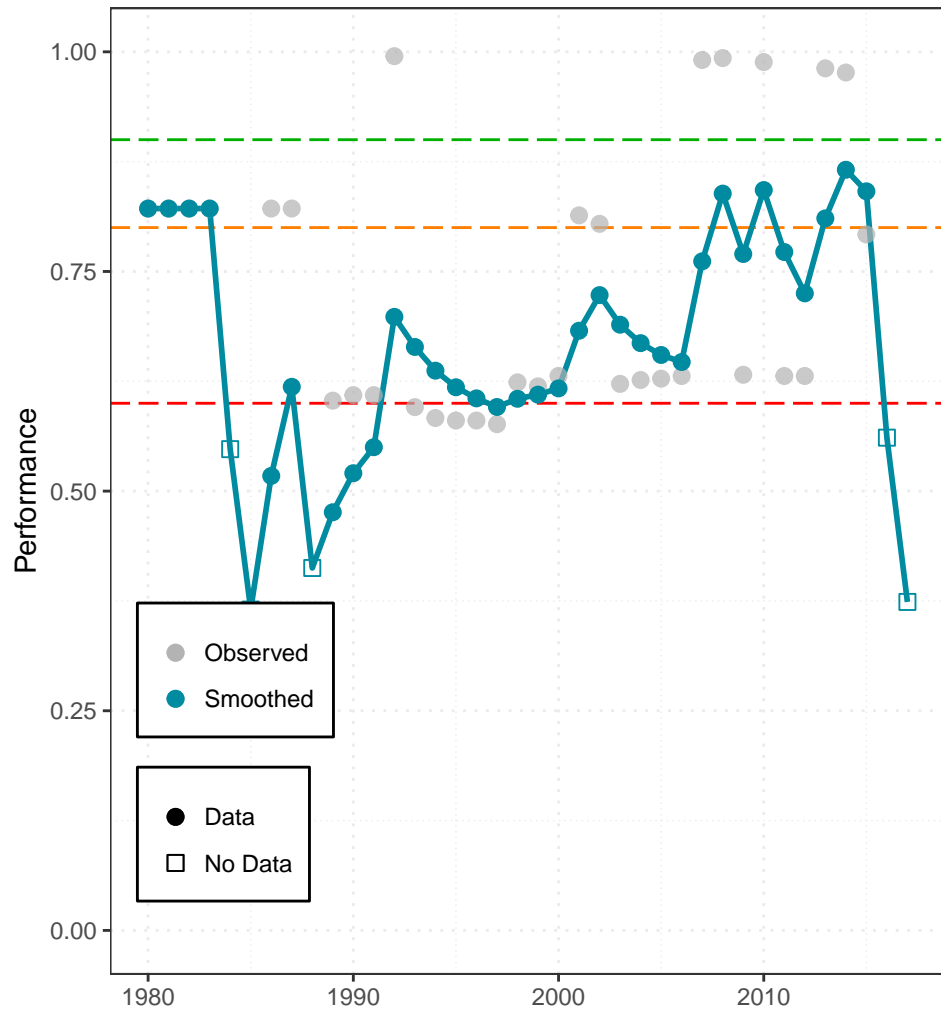

## Completeness

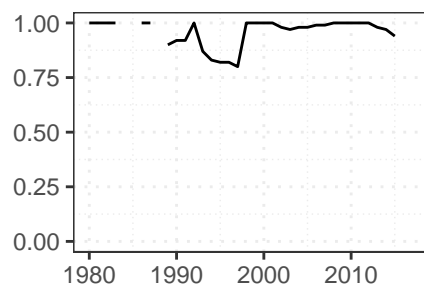

## Age Unspecified

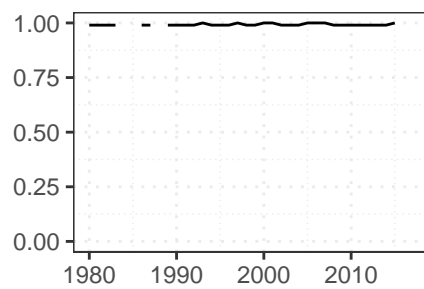

## Sex Unspecified

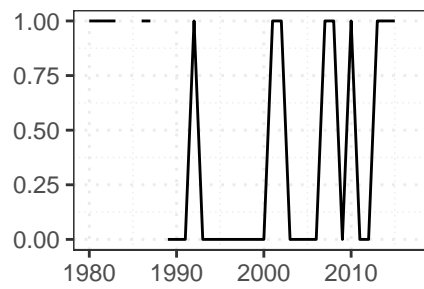

## Birth Order Unspecified

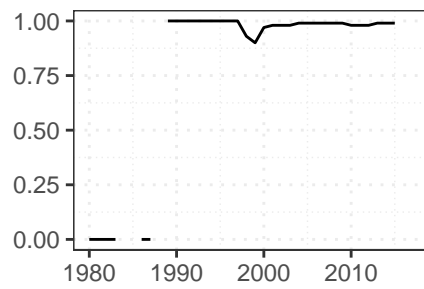

## Birth Weight Unspecified

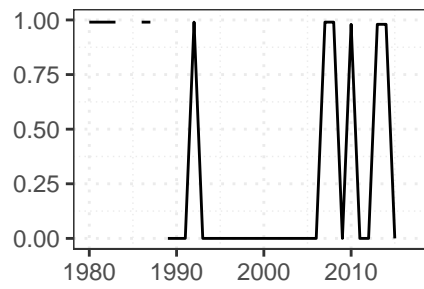



# Bulgaria

## VSPI-B

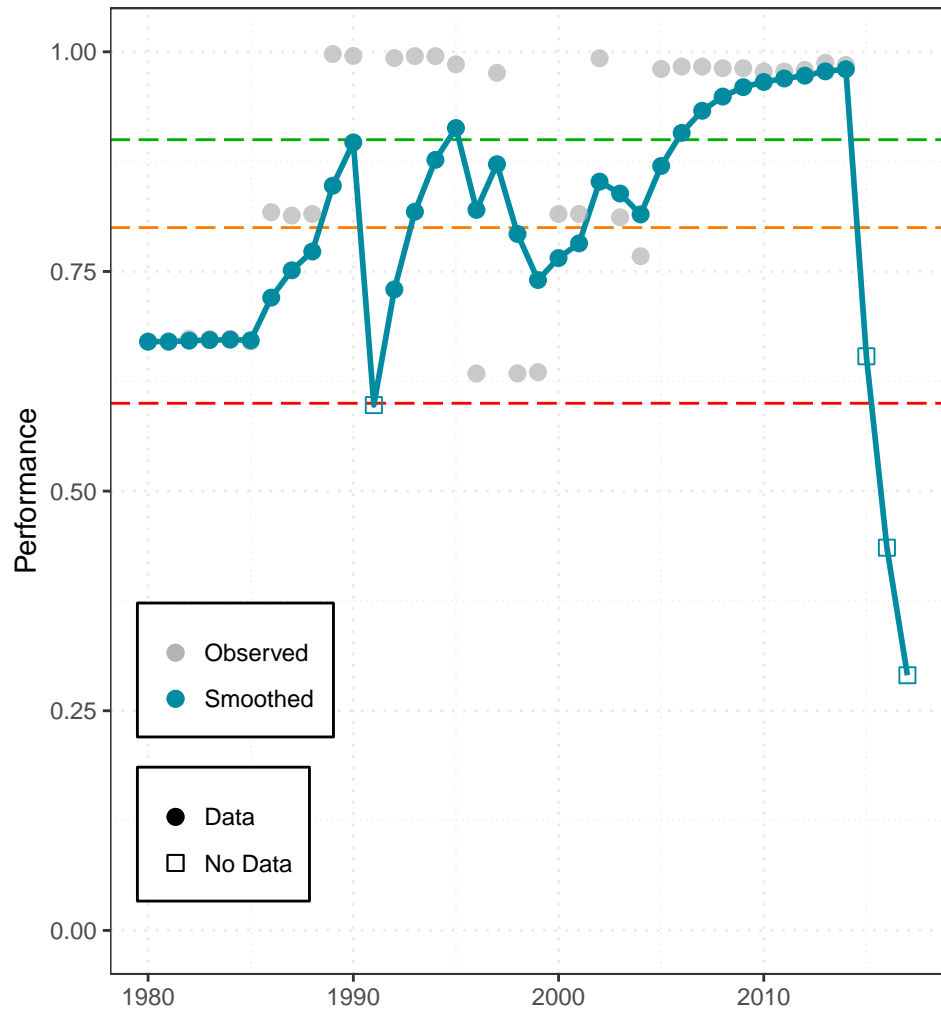

## Completeness

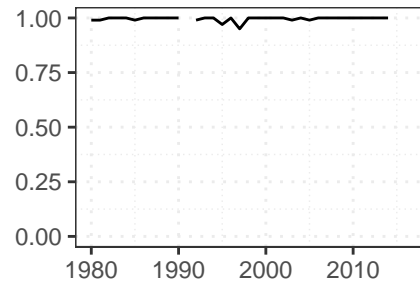

## Age Unspecified

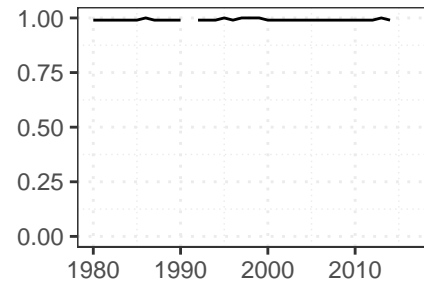

## Sex Unspecified

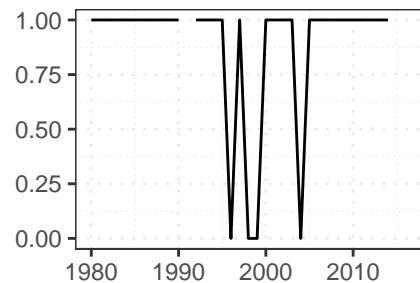

## Birth Order Unspecified

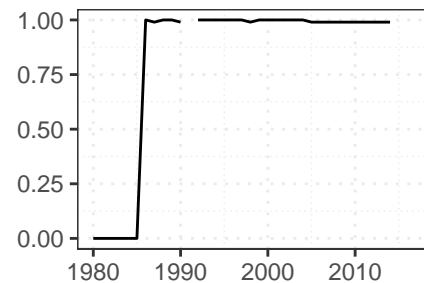

## Birth Weight Unspecified

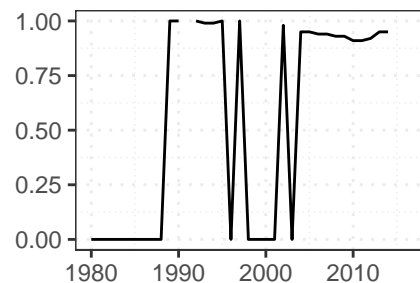

# Bahrain

VSPI-B

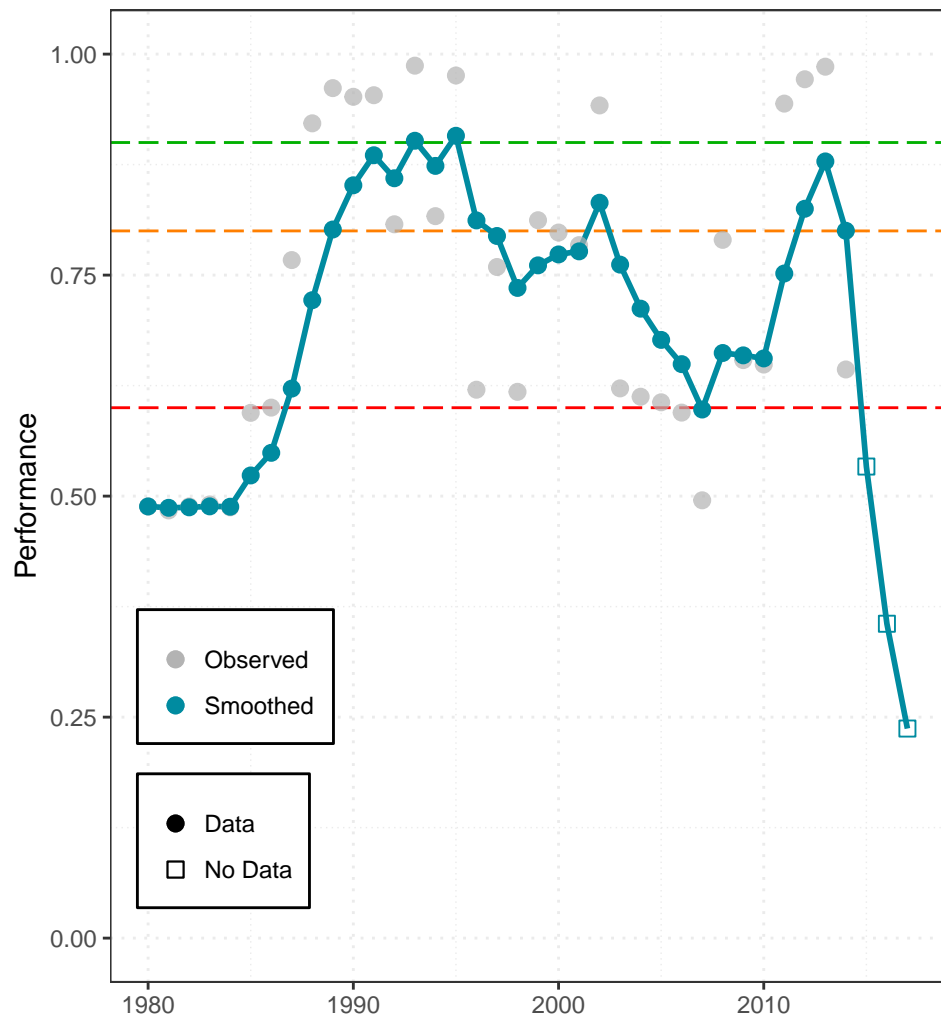

## Completeness

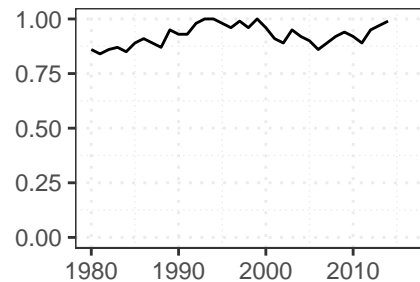

## Age Unspecified

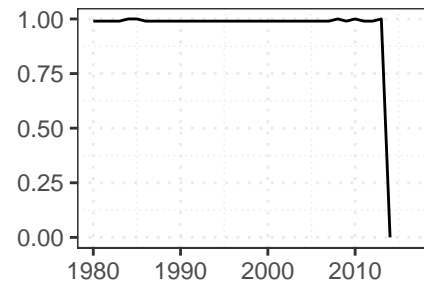

## Sex Unspecified

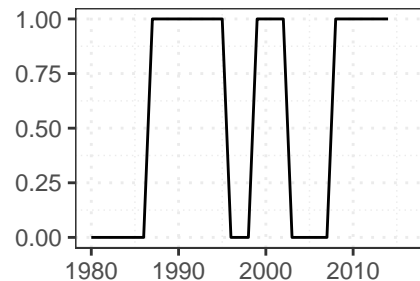

## Birth Order Unspecified

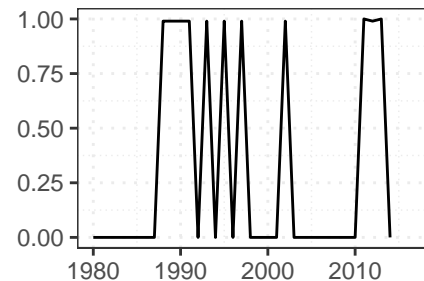

## Birth Weight Unspecified

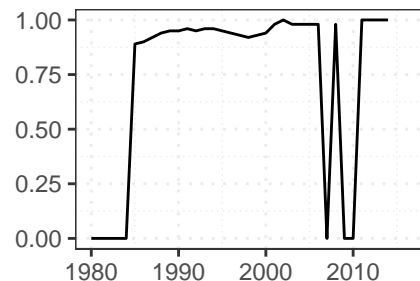

# Bahamas

VSPI-B

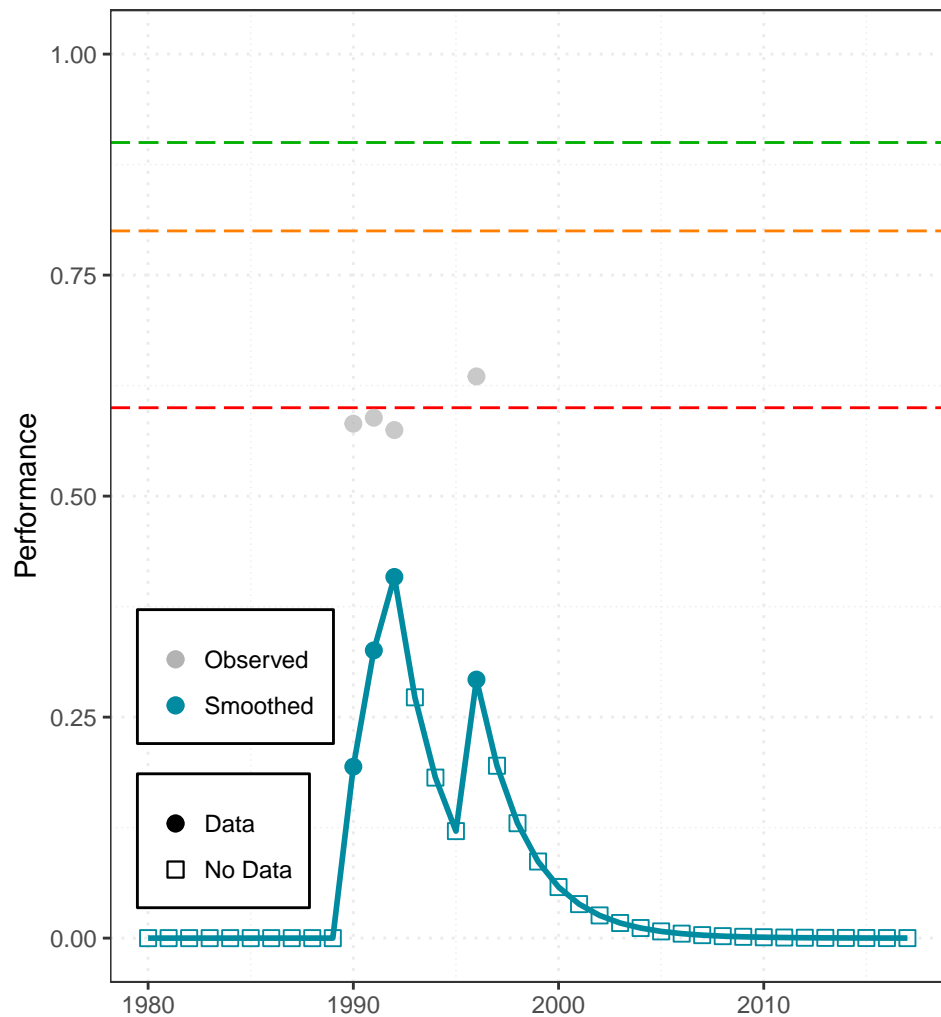

## Completeness

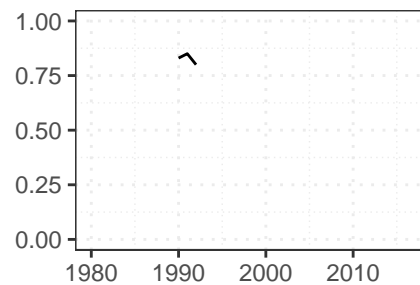

## Age Unspecified

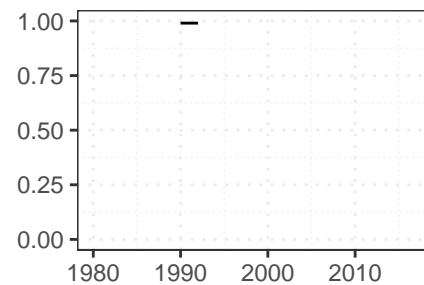

## Sex Unspecified

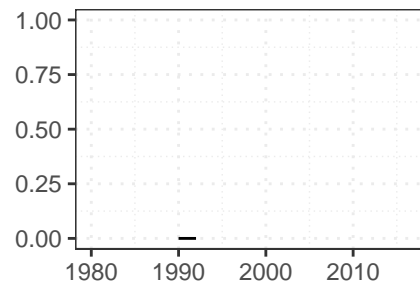

## Birth Order Unspecified

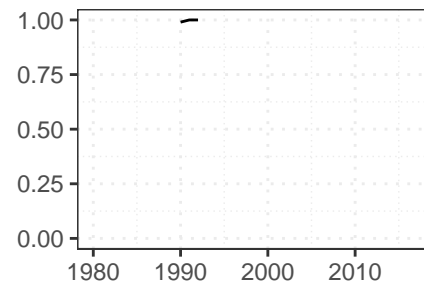

## Birth Weight Unspecified

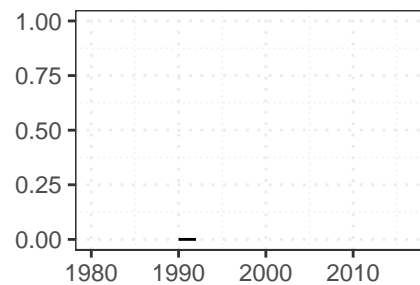

# Bosnia and Herzegovina

VSPI-B

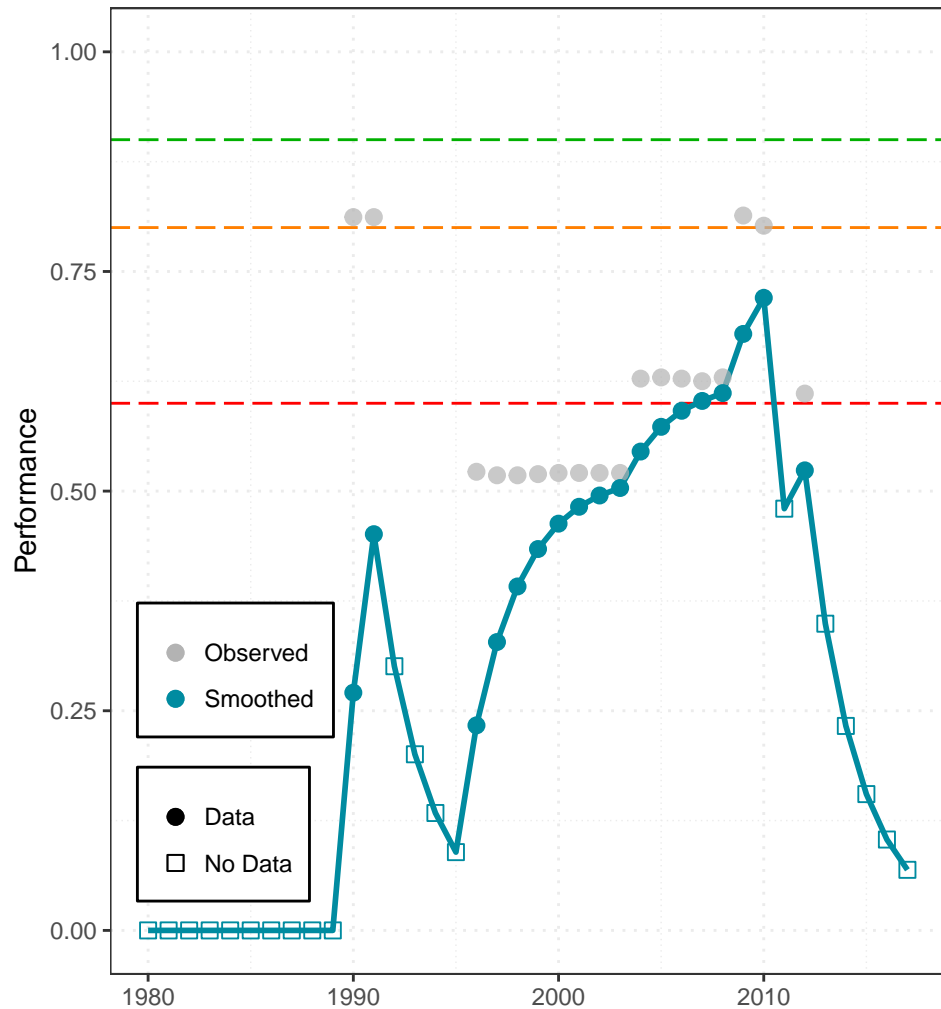

Completeness

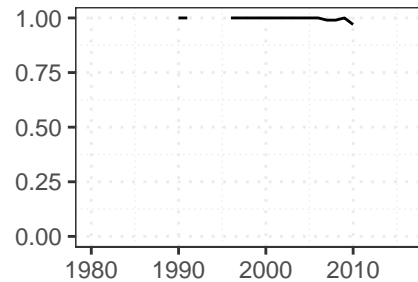

Age Unspecified

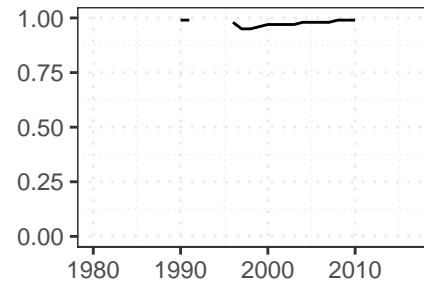

Sex Unspecified

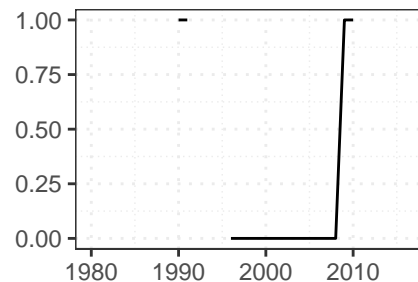

Birth Order Unspecified

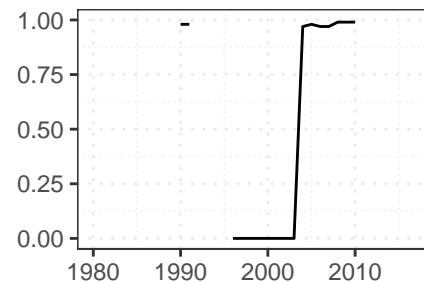

Birth Weight Unspecified

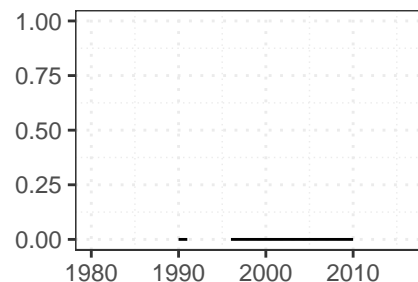

# Belarus

## VSPI-B

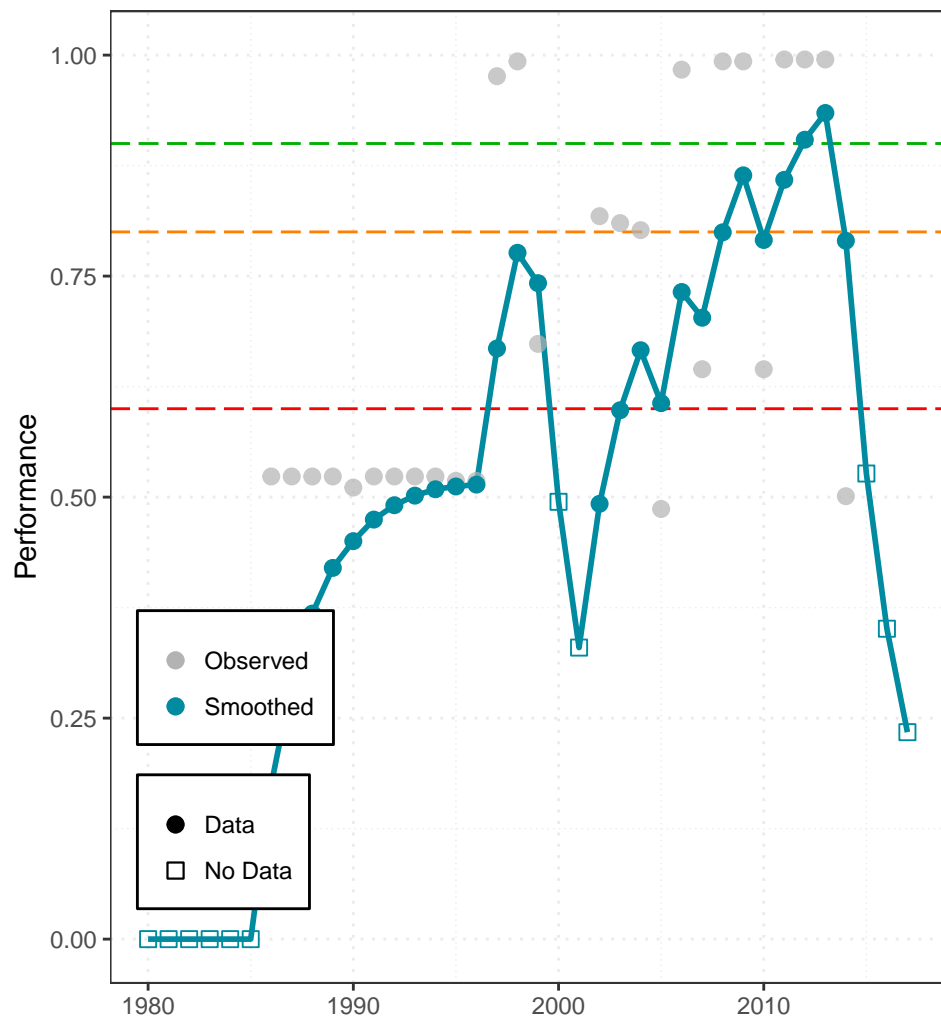

# Completeness

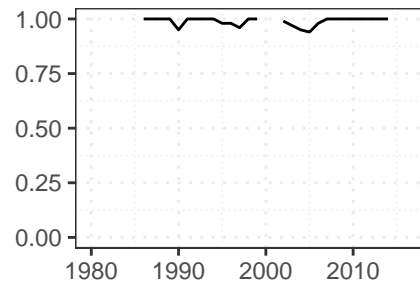

# Age Unspecified

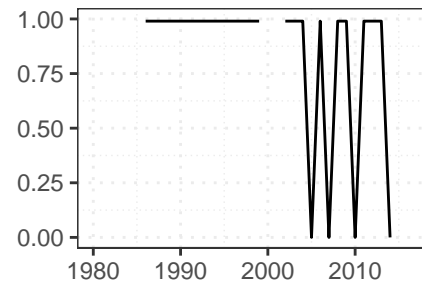

# Sex Unspecified

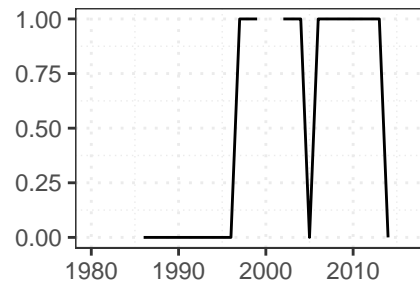

# Birth Order Unspecified

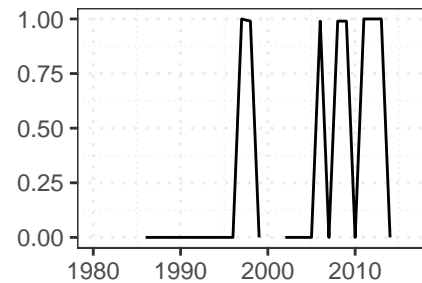

# Birth Weight Unspecified

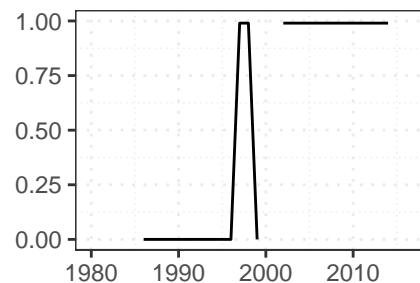

# Brazil

## VSPI-B

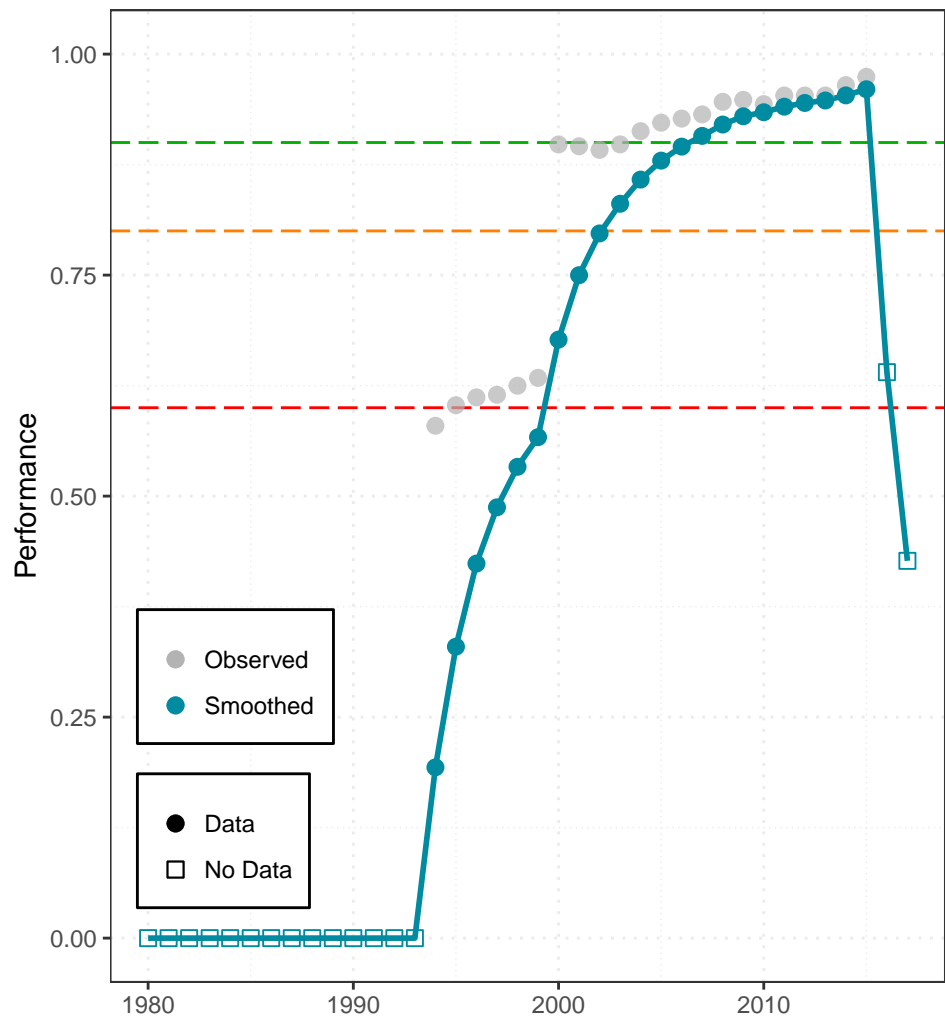

# Completeness

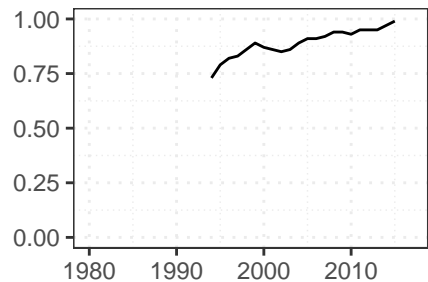

# Age Unspecified

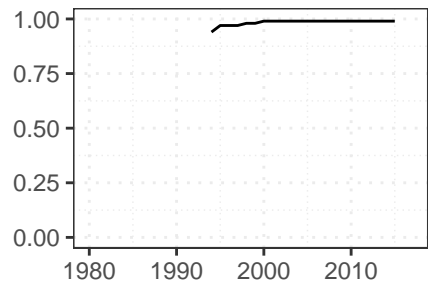

# Sex Unspecified

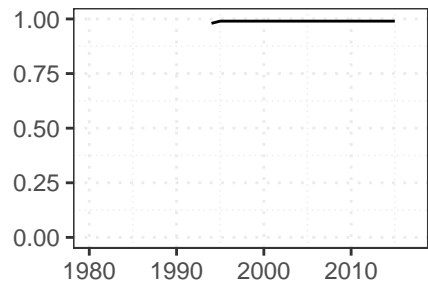

# Birth Order Unspecified

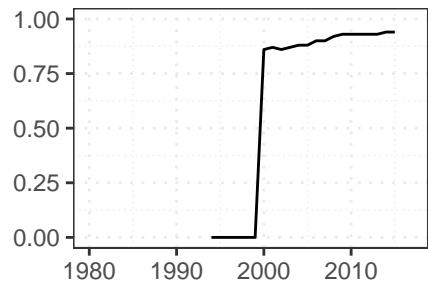

# Birth Weight Unspecified

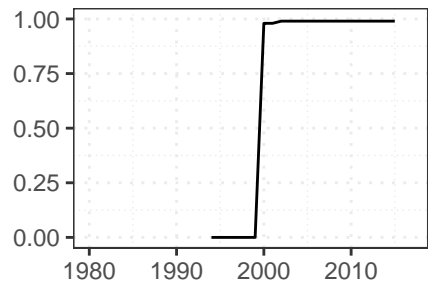

# Barbados

VSPI-B

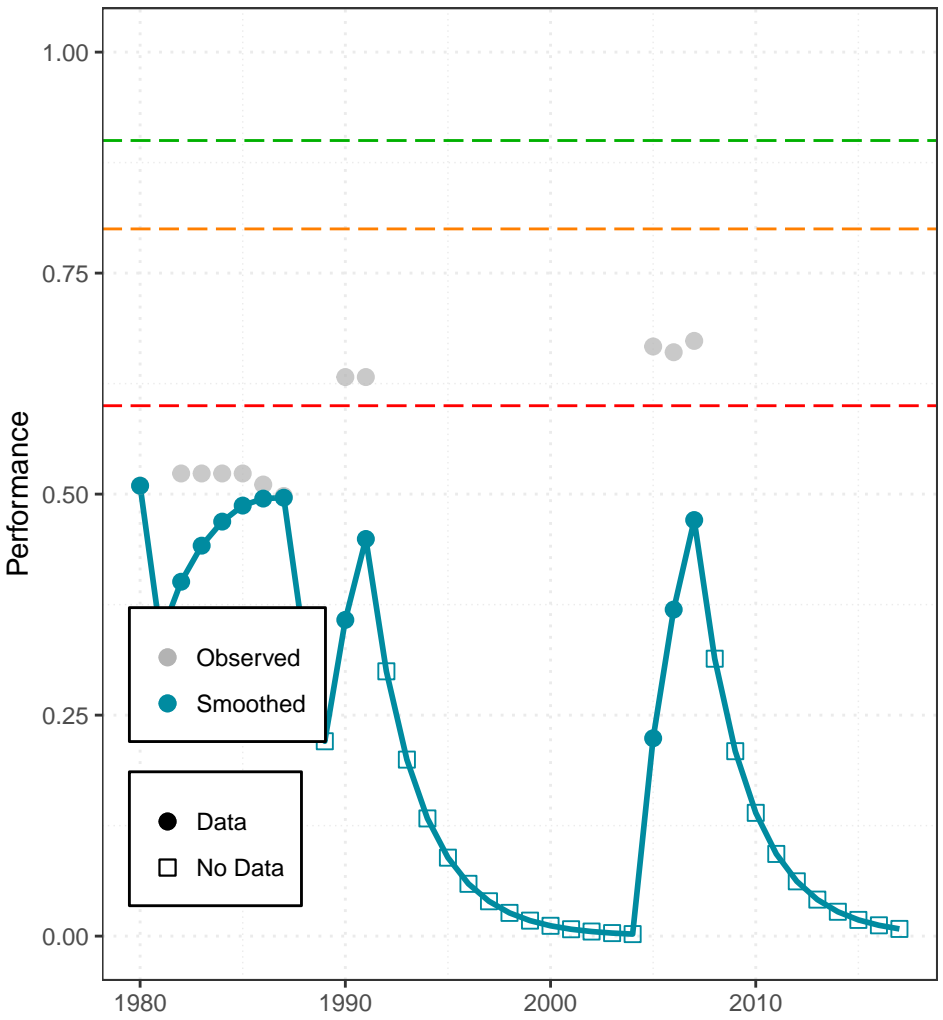

## Completeness

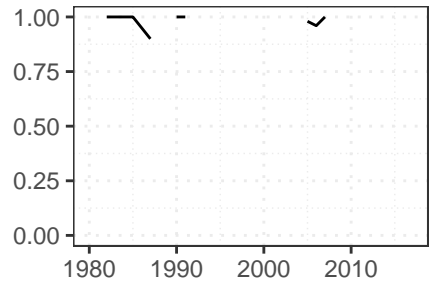

## Age Unspecified

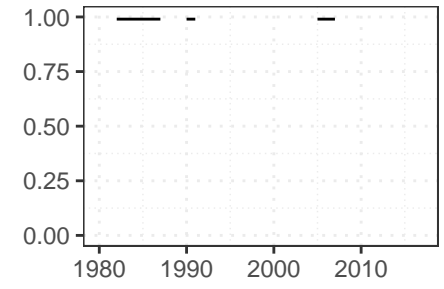

## Sex Unspecified

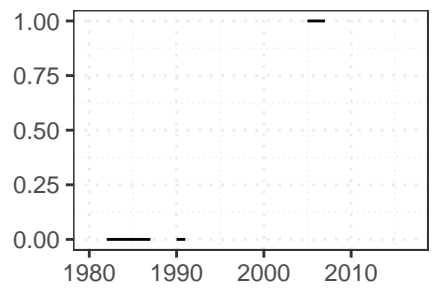

## Birth Order Unspecified

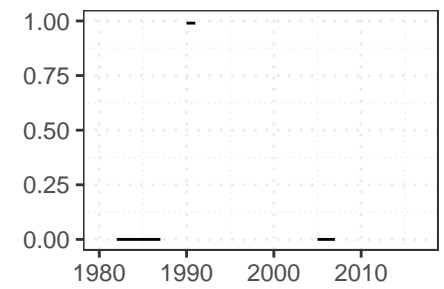

## Birth Weight Unspecified

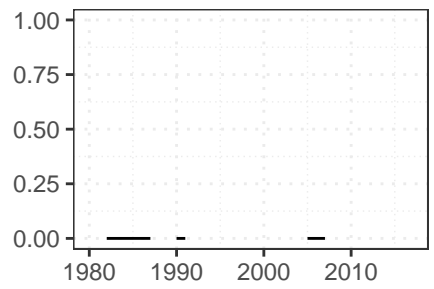

# Brunei Darussalam

VSPI-B

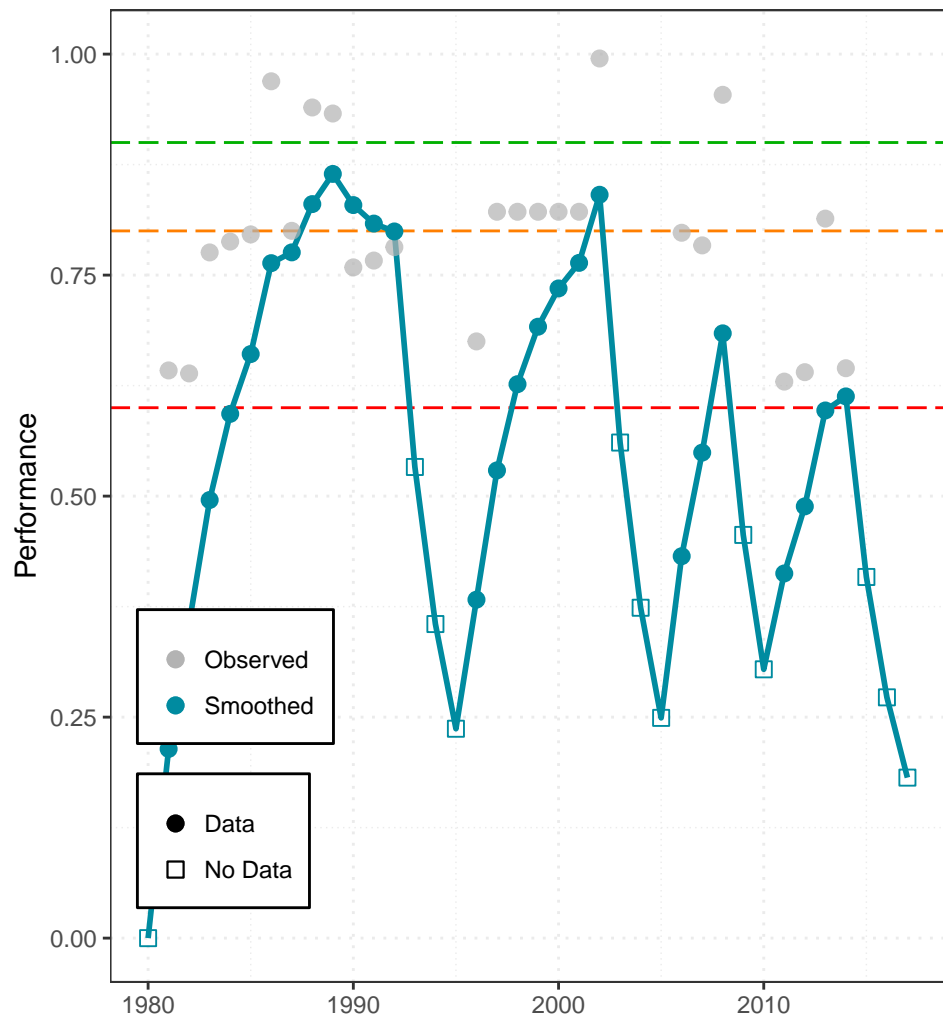

## Completeness

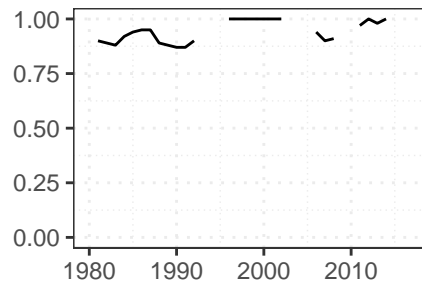

## Age Unspecified

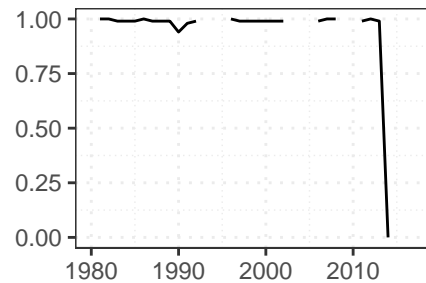

## Sex Unspecified

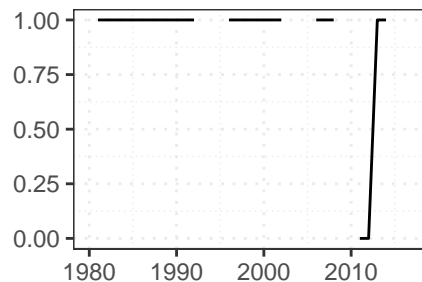

## Birth Order Unspecified

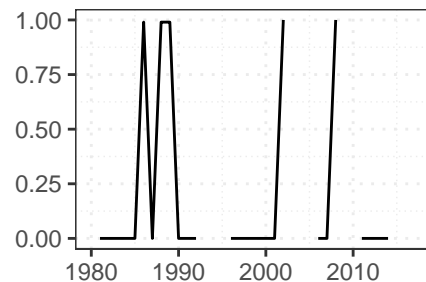

## Birth Weight Unspecified

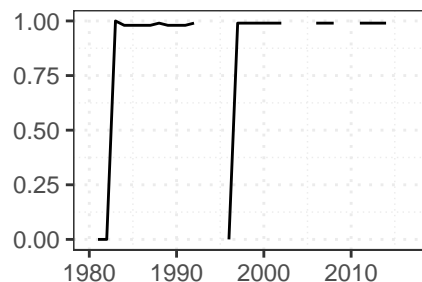



# Canada VSPI-B

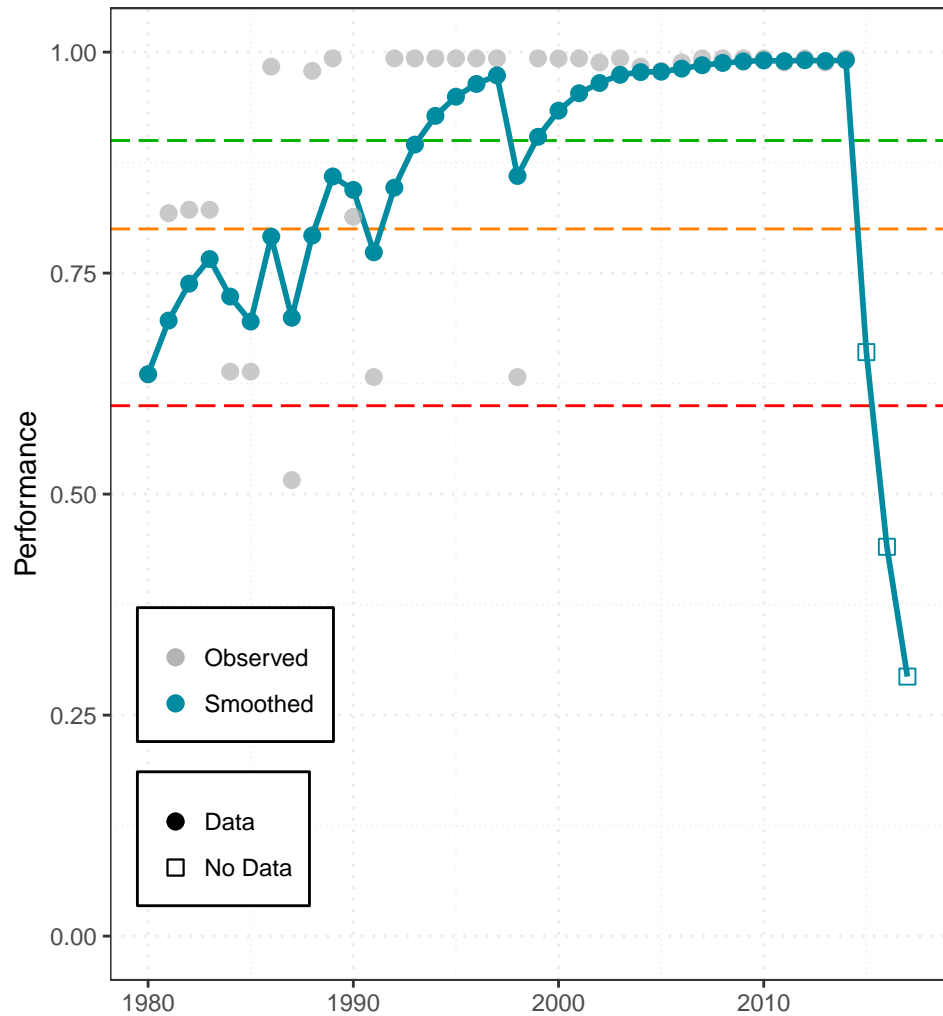

## Completeness

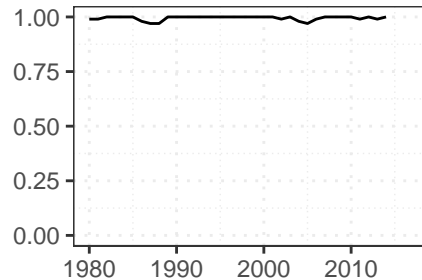

## Age Unspecified

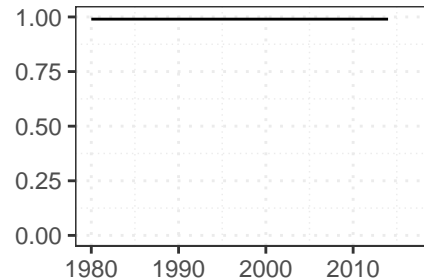

## Sex Unspecified

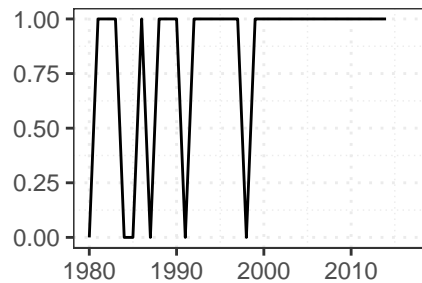

## Birth Order Unspecified

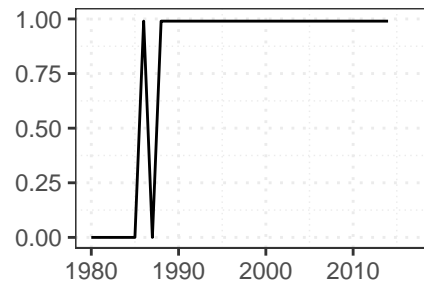

## Birth Weight Unspecified

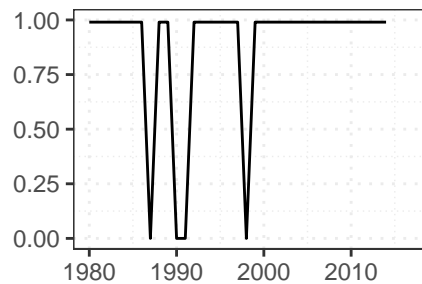

# Switzerland

VSPI-B

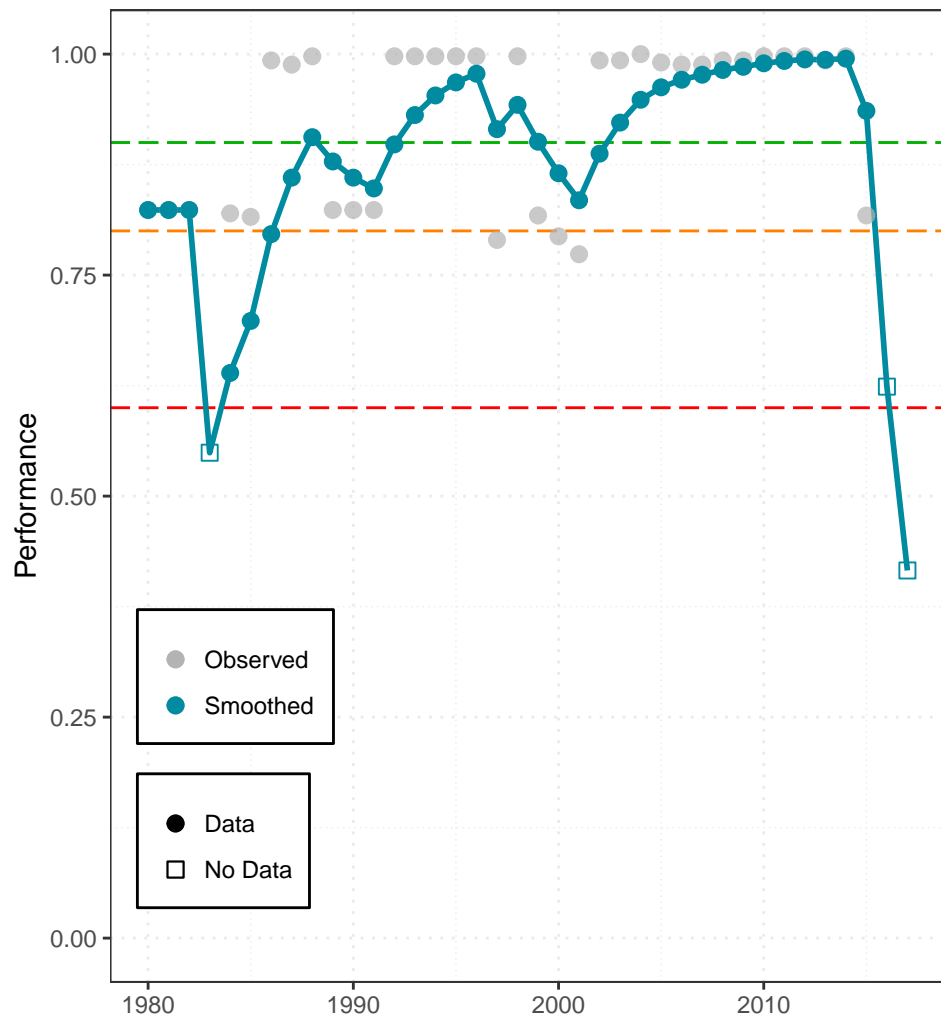

## Completeness

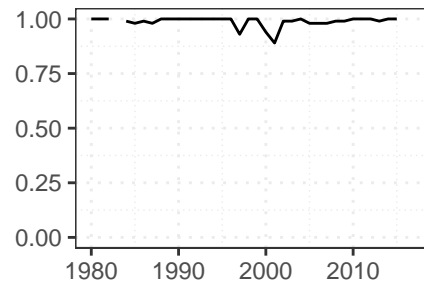

## Age Unspecified

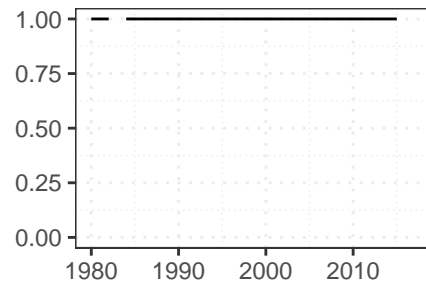

## Sex Unspecified

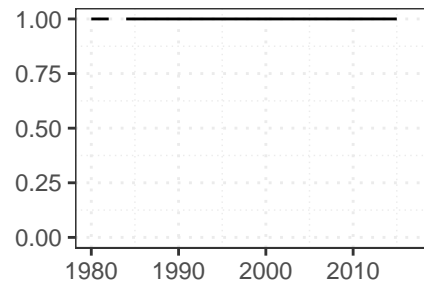

## Birth Order Unspecified

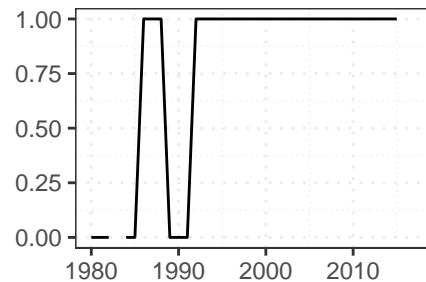

## Birth Weight Unspecified

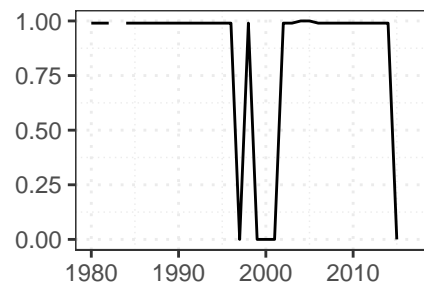

# Chile VSPI-B

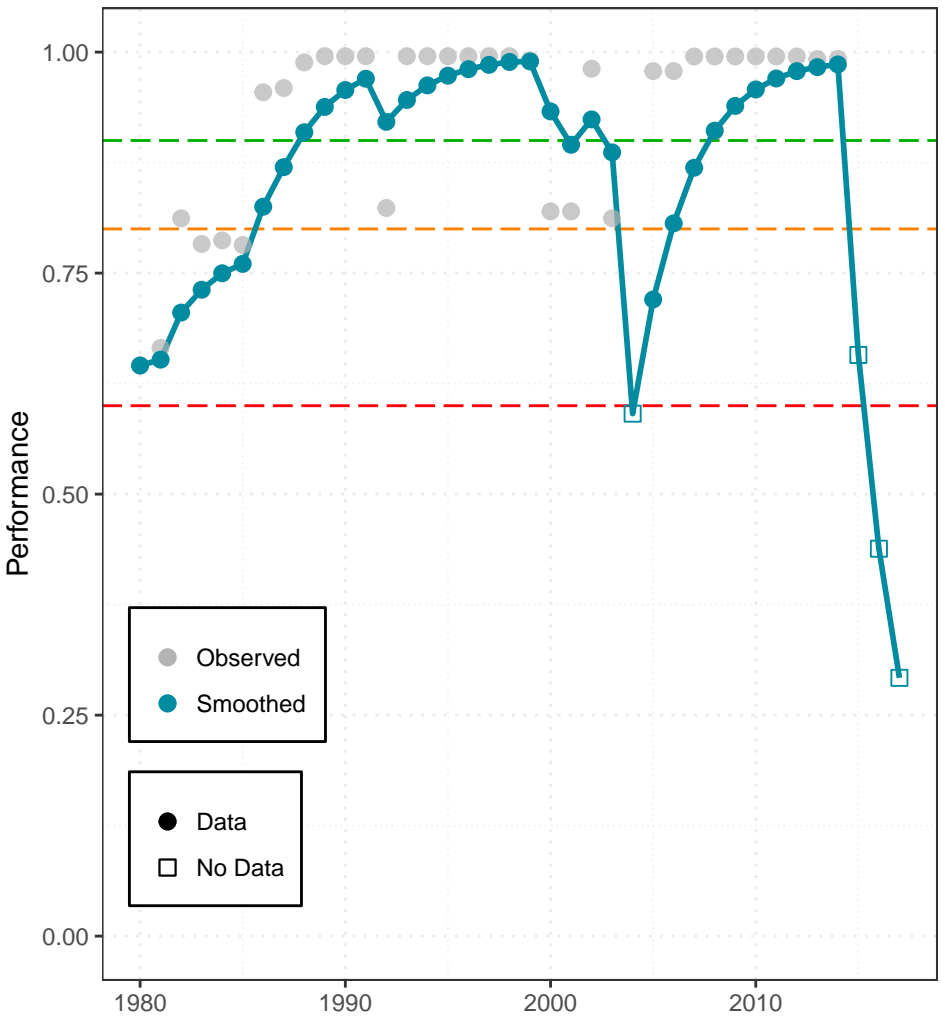

## Completeness

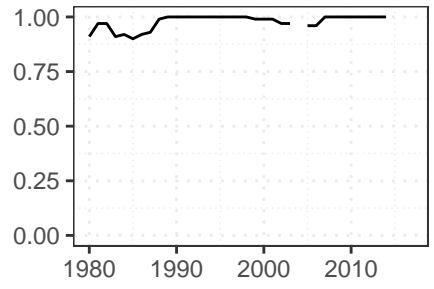

## Age Unspecified

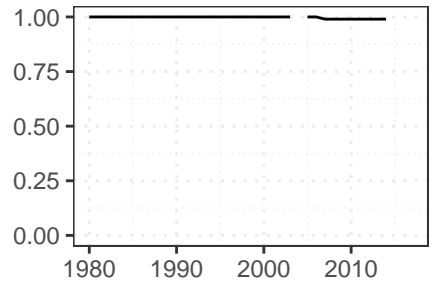

## Sex Unspecified

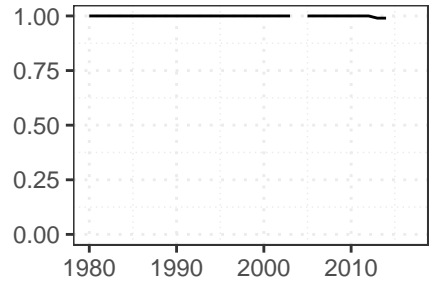

## Birth Order Unspecified

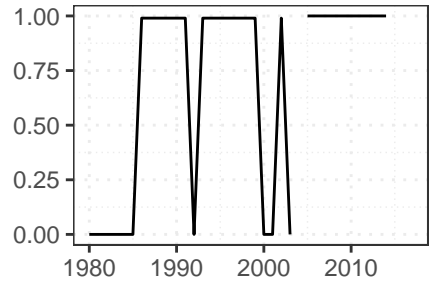

## Birth Weight Unspecified

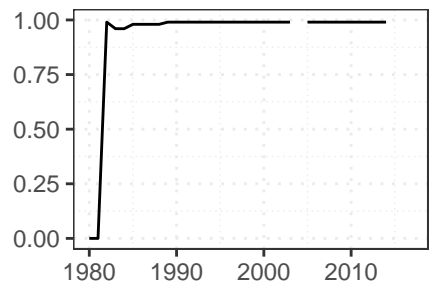

# Colombia

VSPI-B

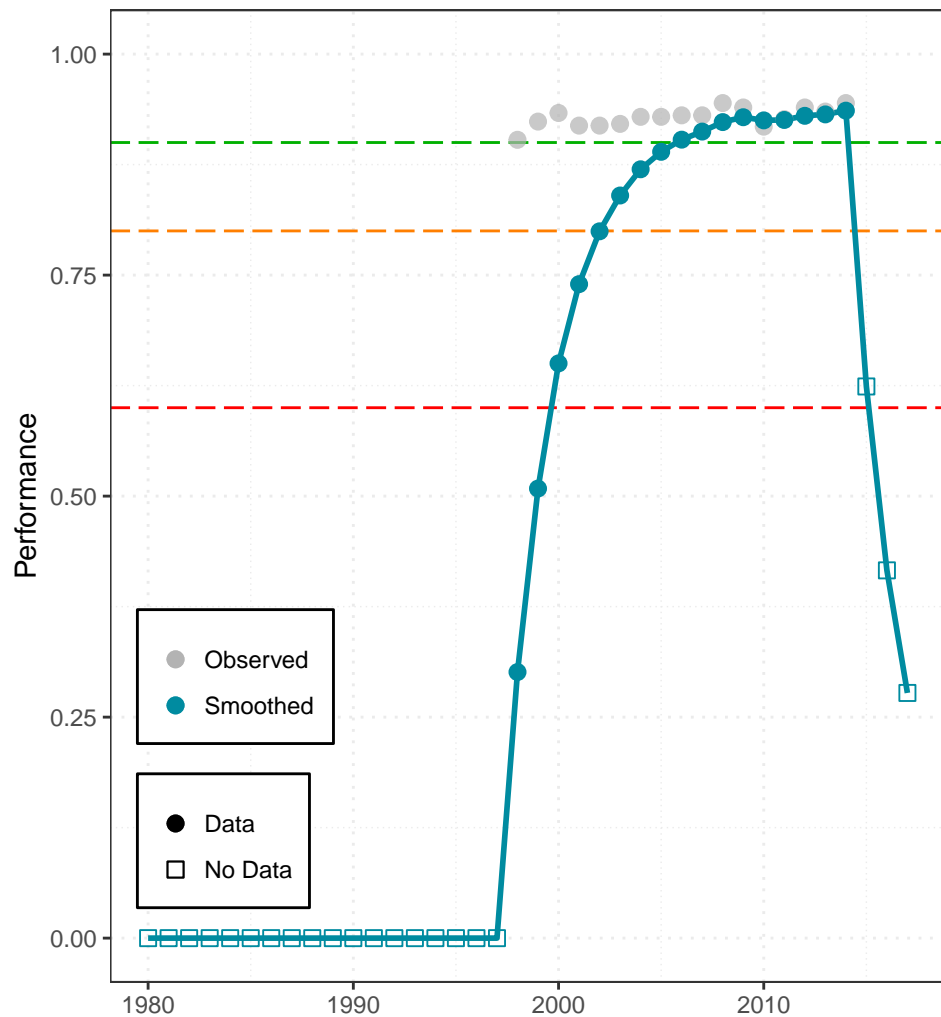

## Completeness

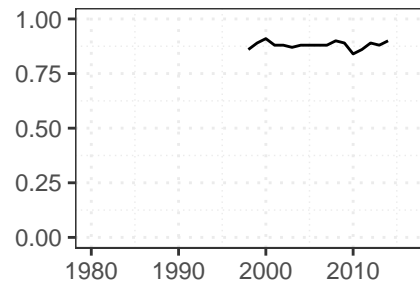

## Age Unspecified

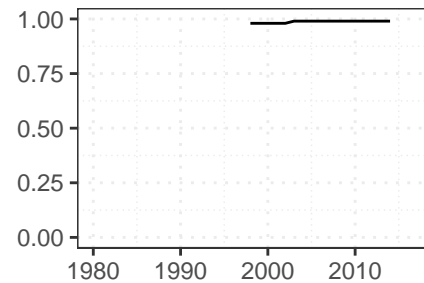

## Sex Unspecified

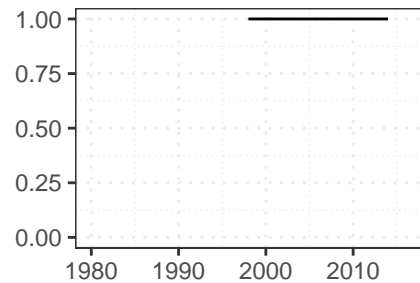

## Birth Order Unspecified

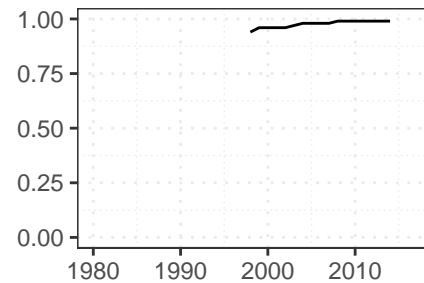

## Birth Weight Unspecified

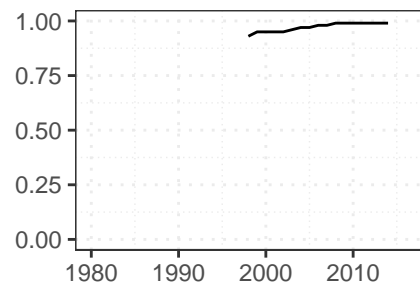

# Costa Rica

VSPI-B

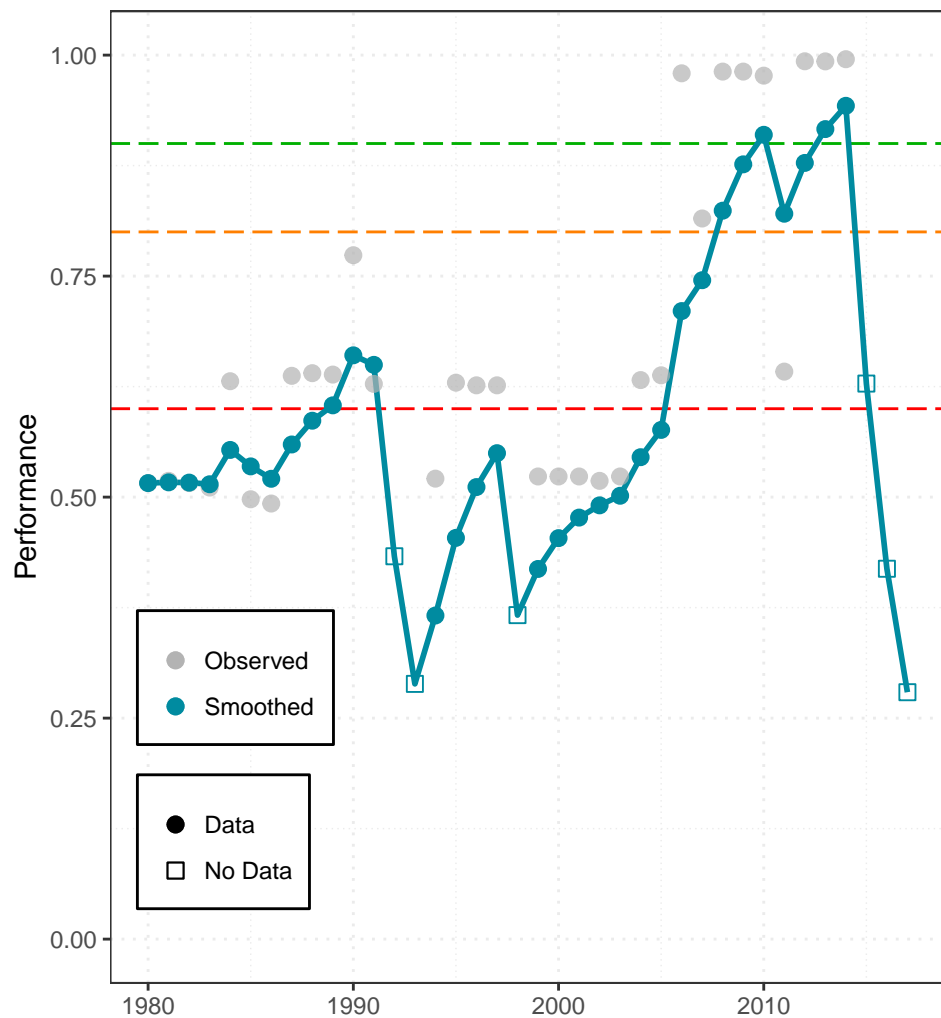

## Completeness

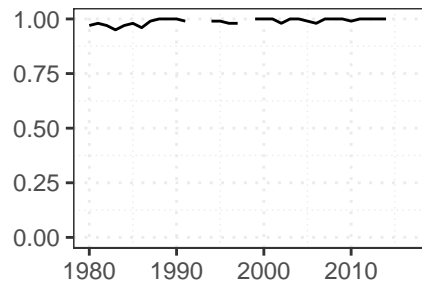

## Age Unspecified

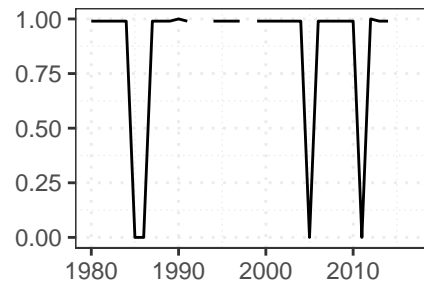

## Sex Unspecified

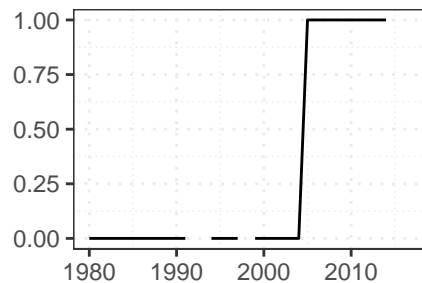

## Birth Order Unspecified

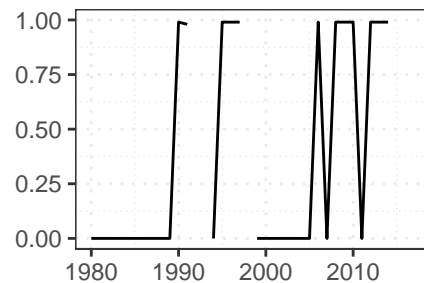

## Birth Weight Unspecified

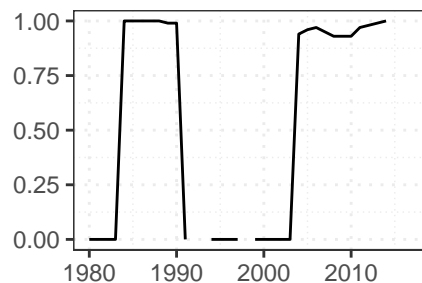

# Cuba VSPI-B

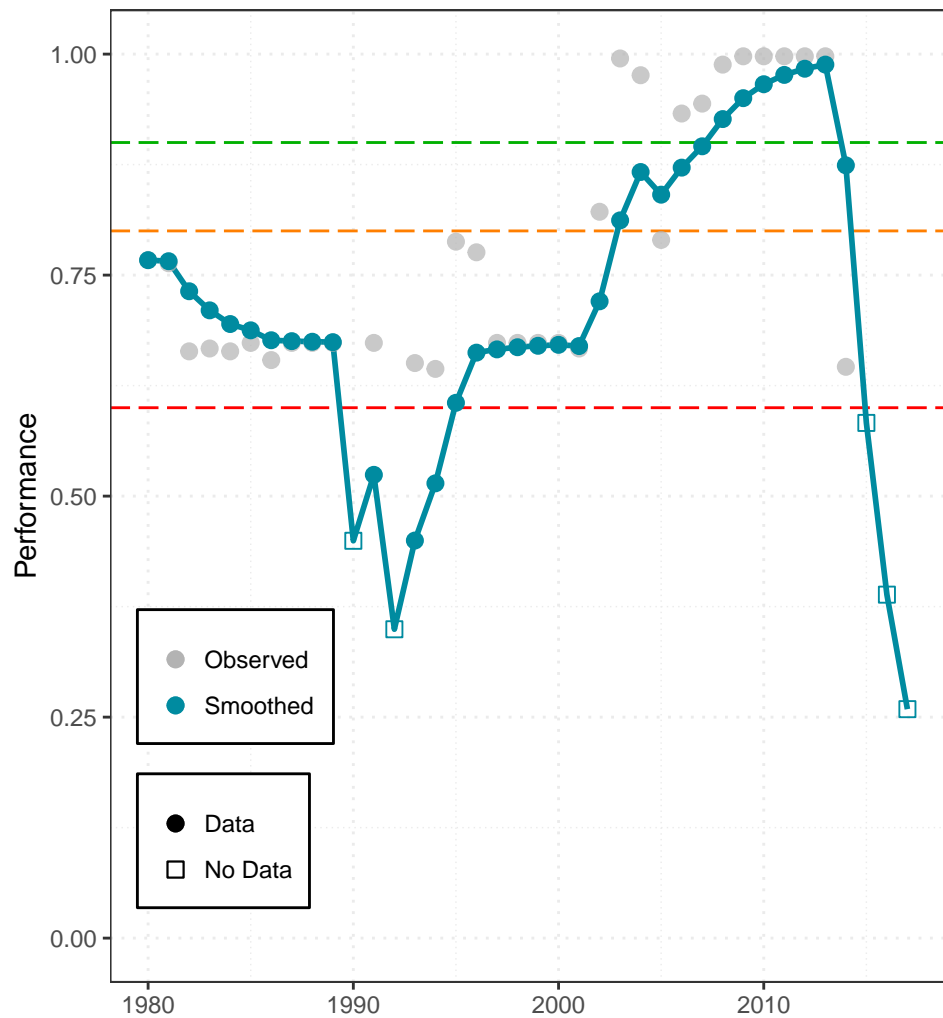

## Completeness

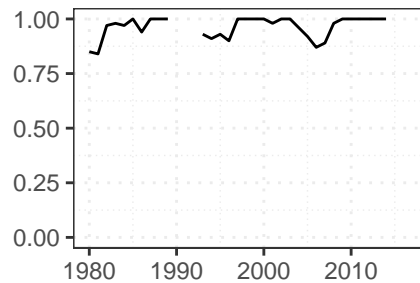

## Age Unspecified

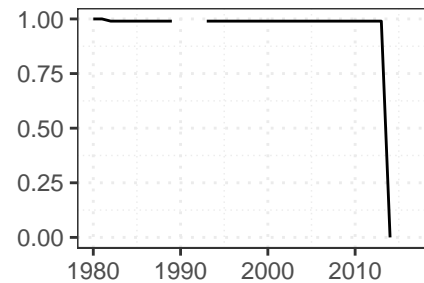

## Sex Unspecified

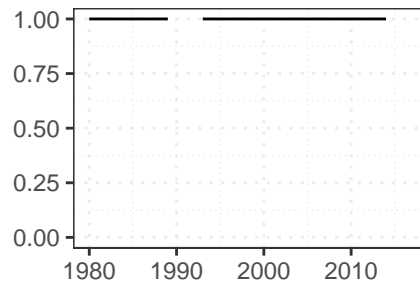

## Birth Order Unspecified

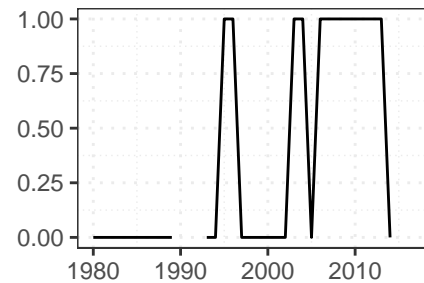

## Birth Weight Unspecified

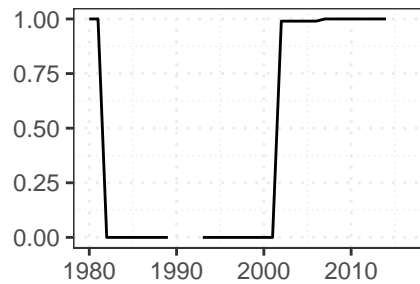

# Cyprus

VSPI-B

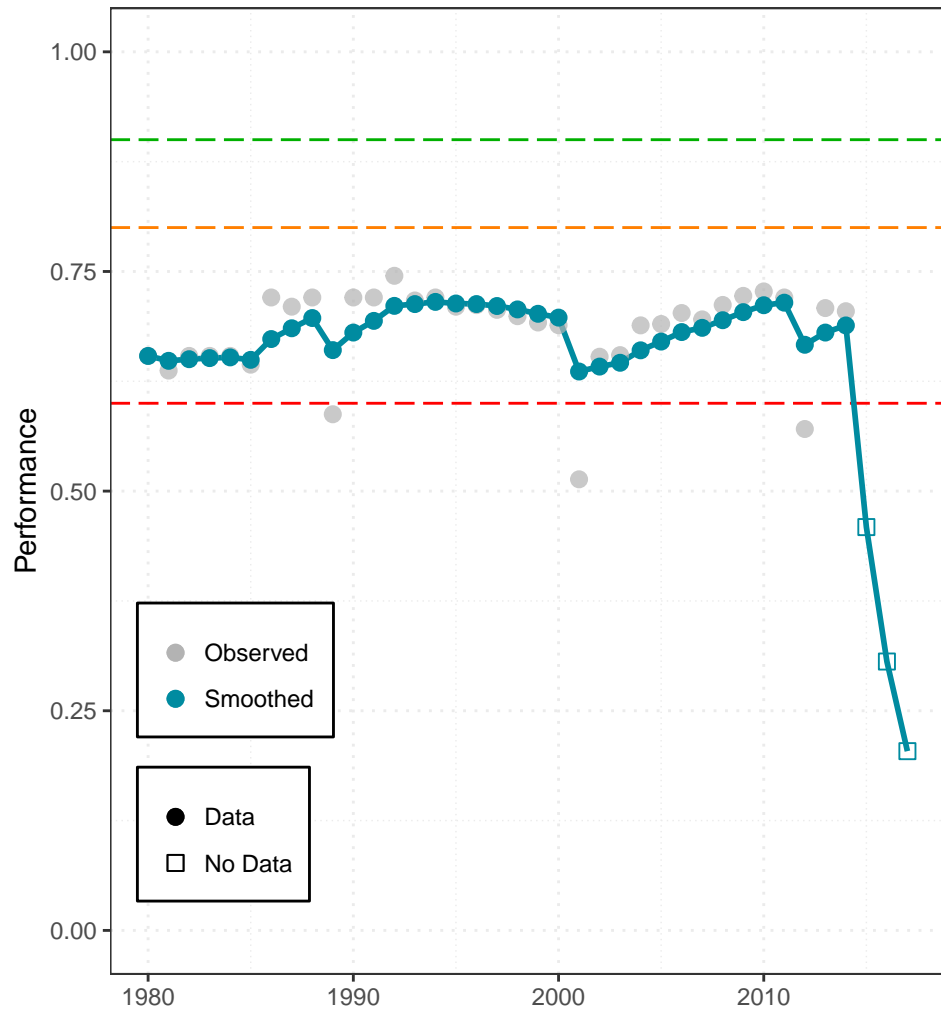

## Completeness

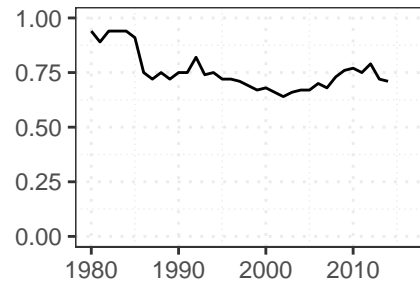

## Age Unspecified

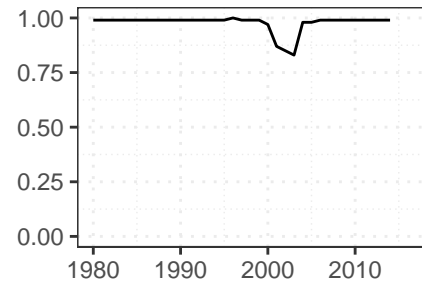

## Sex Unspecified

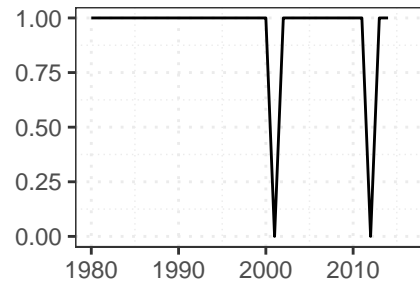

## Birth Order Unspecified

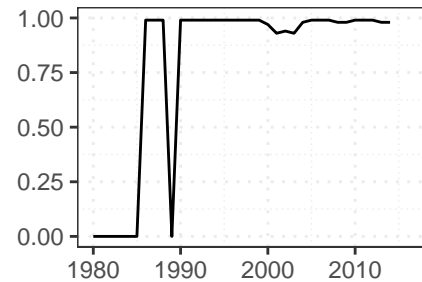

## Birth Weight Unspecified

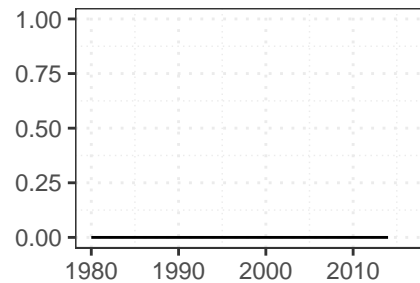

# Czech Republic

VSPI-B

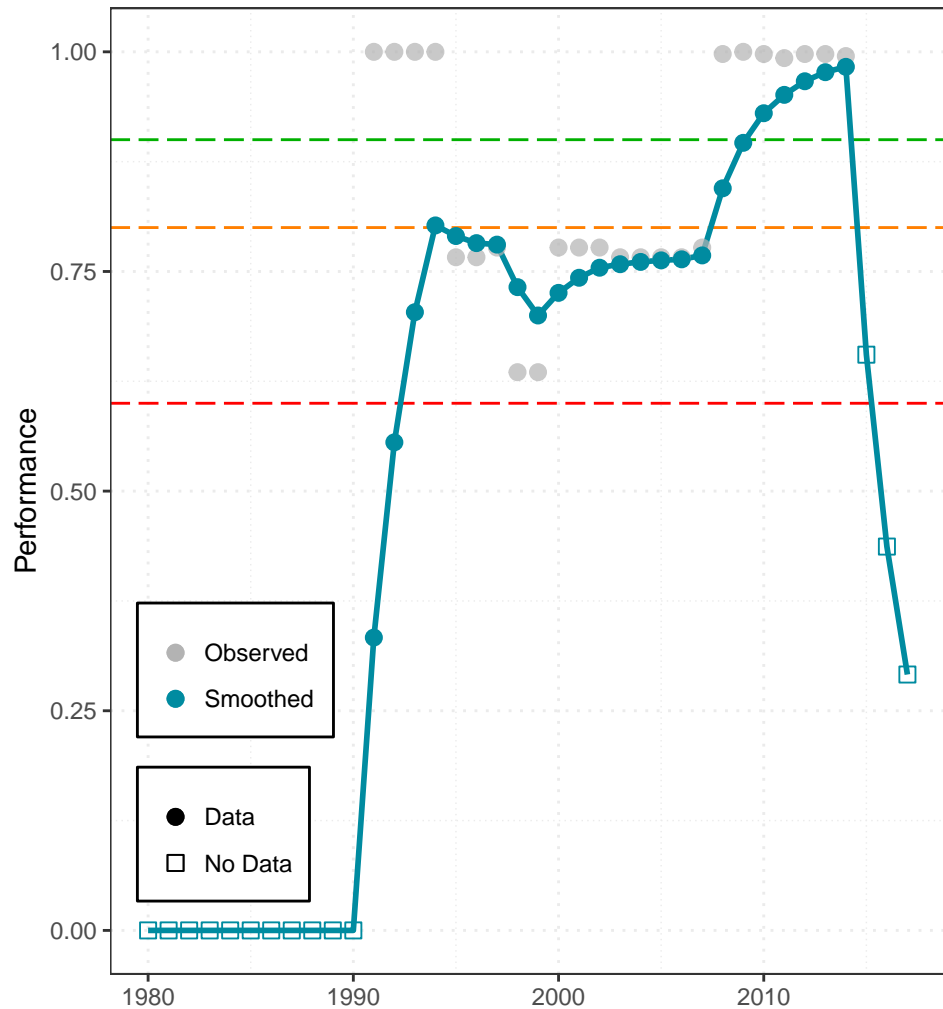

## Completeness

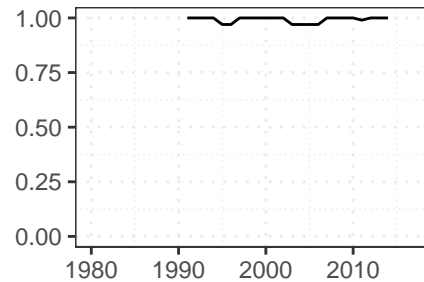

## Age Unspecified

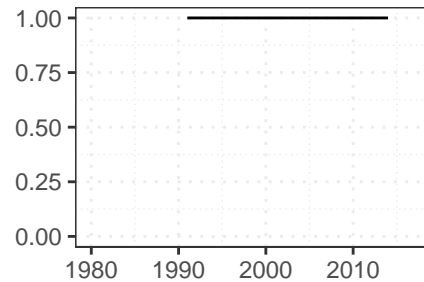

## Sex Unspecified

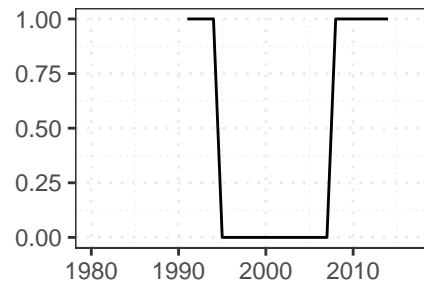

## Birth Order Unspecified

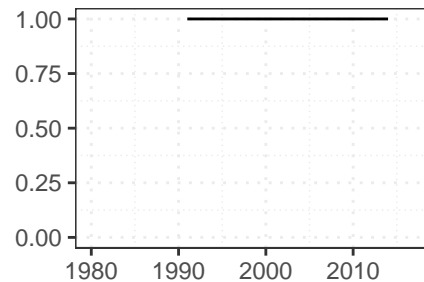

## Birth Weight Unspecified

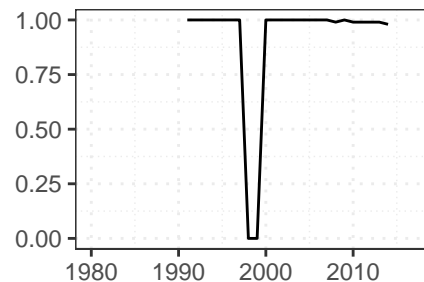



# Germany

## VSPI-B

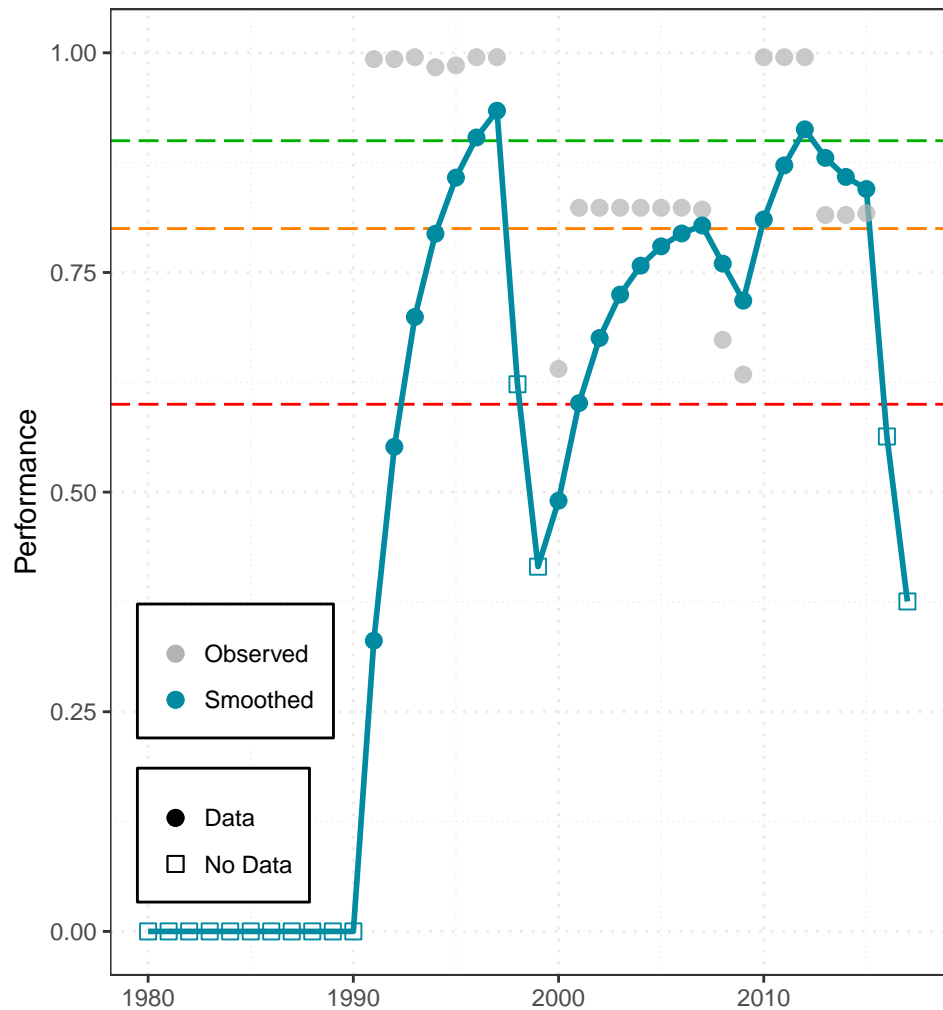

## Completeness

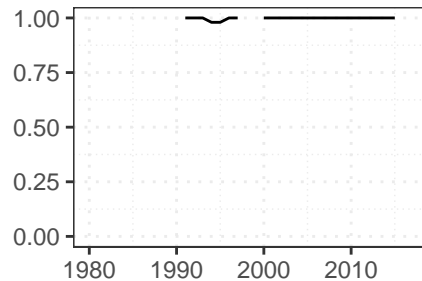

## Age Unspecified

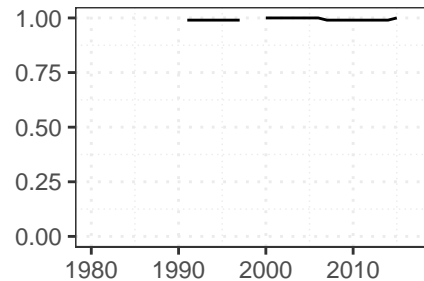

## Sex Unspecified

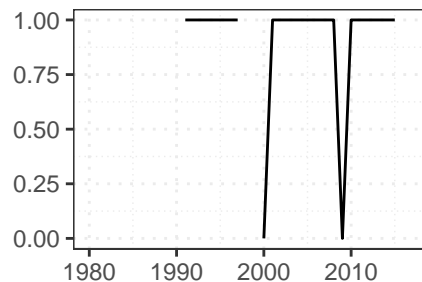

## Birth Order Unspecified

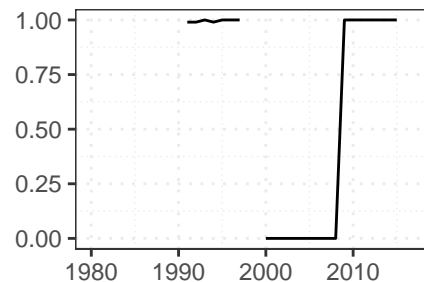

## Birth Weight Unspecified

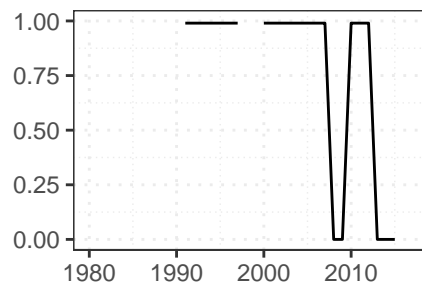

# Denmark

## VSPI-B

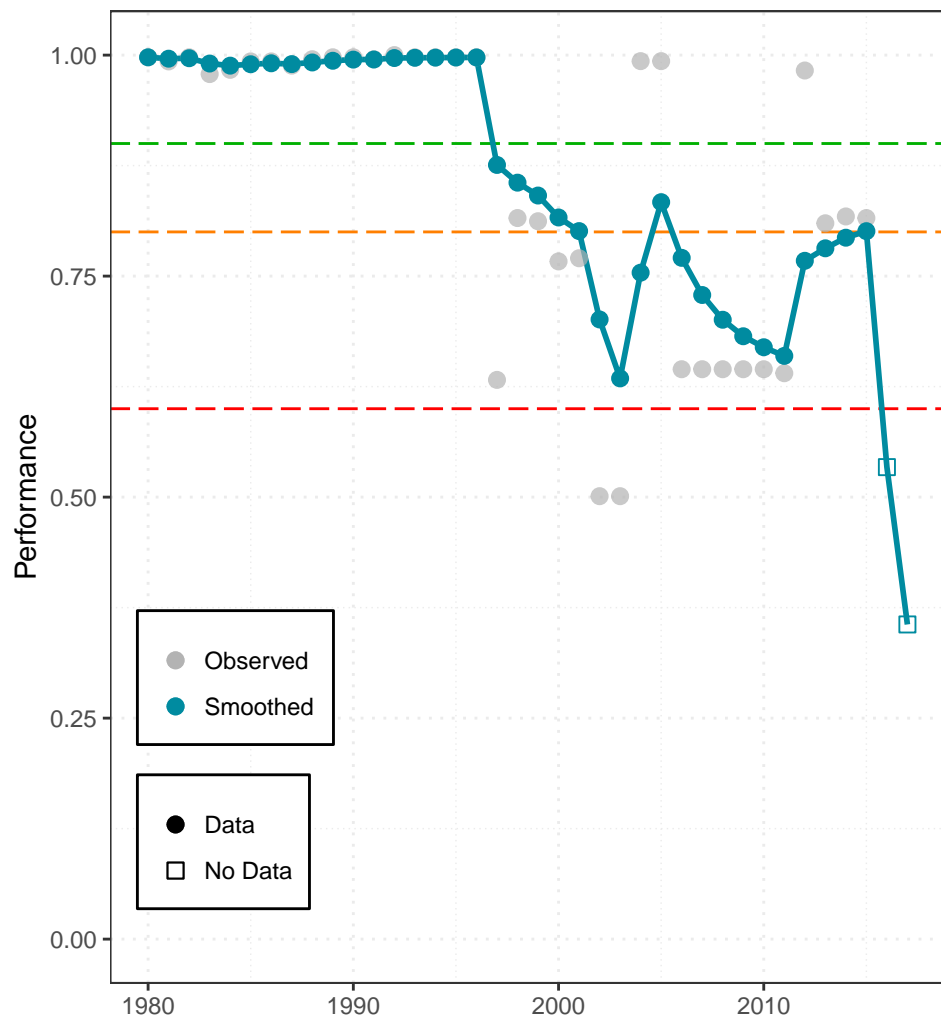

## Completeness

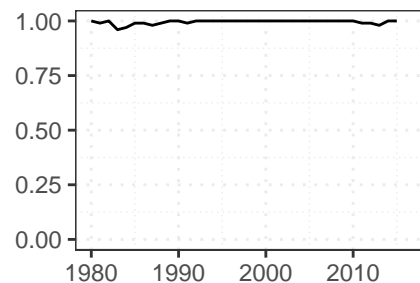

## Age Unspecified

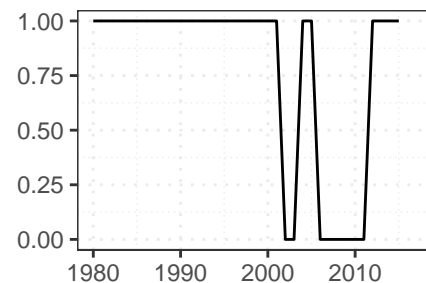

## Sex Unspecified

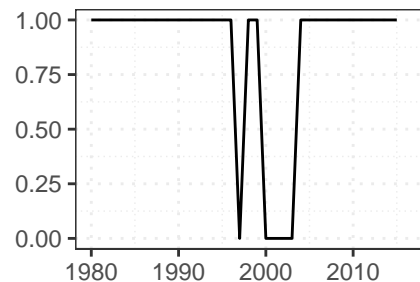

## Birth Order Unspecified

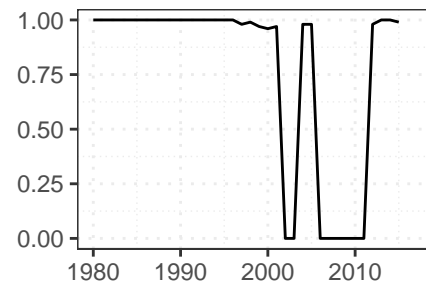

## Birth Weight Unspecified

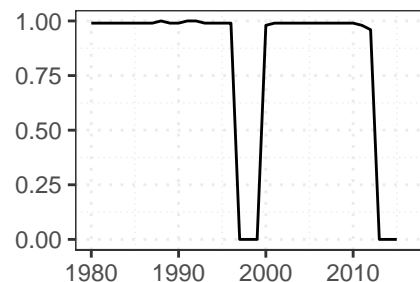

# Algeria

VSPI-B

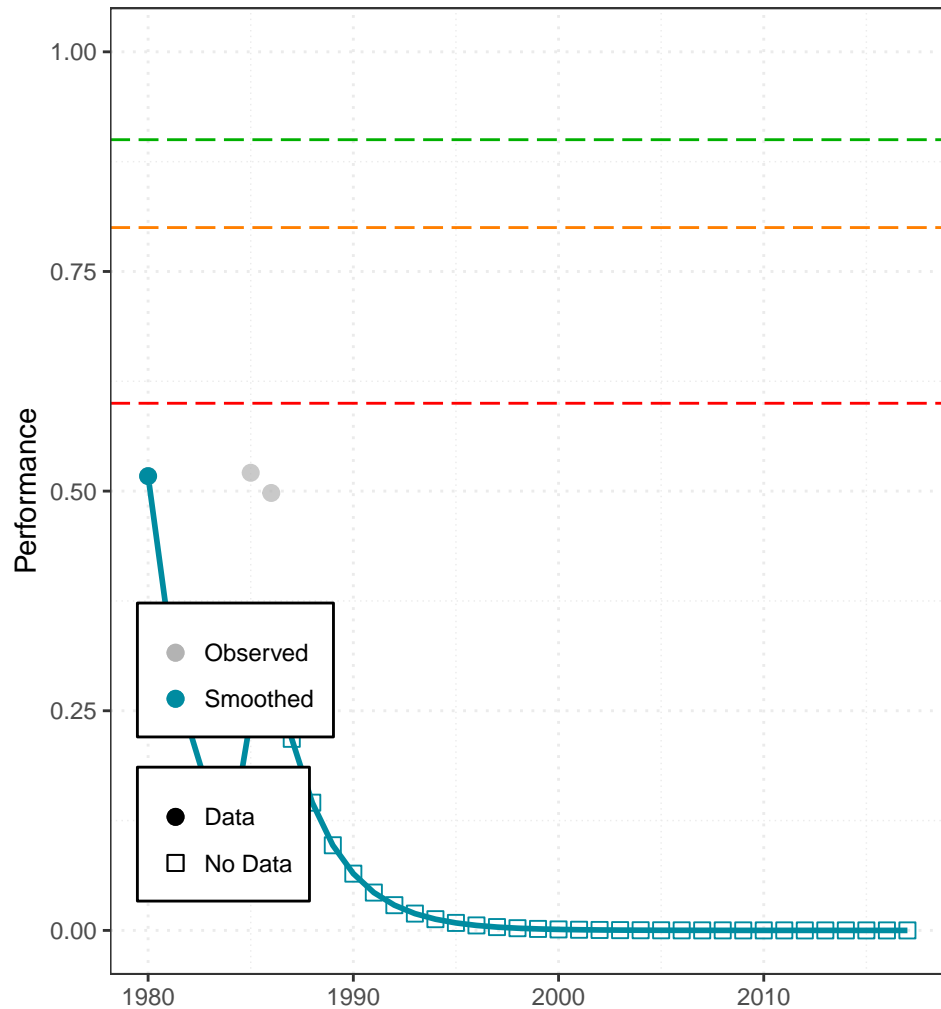

## Completeness

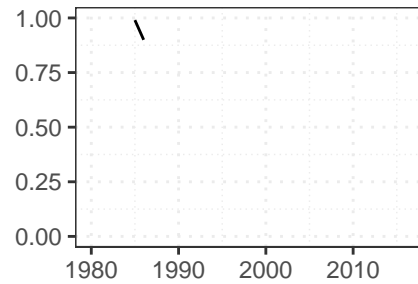

## Age Unspecified

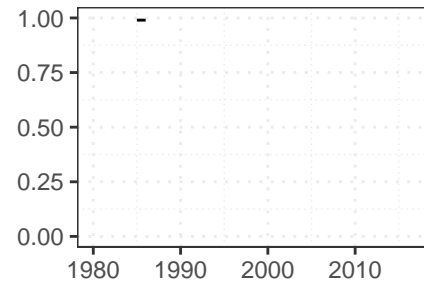

## Sex Unspecified

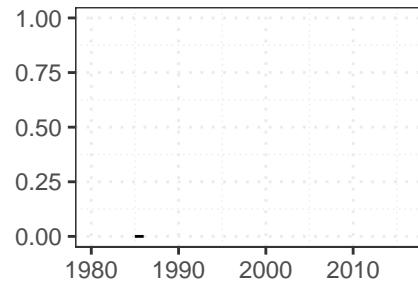

## Birth Order Unspecified

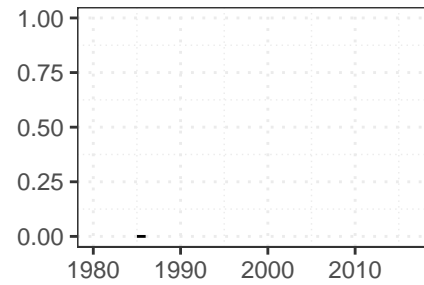

## Birth Weight Unspecified

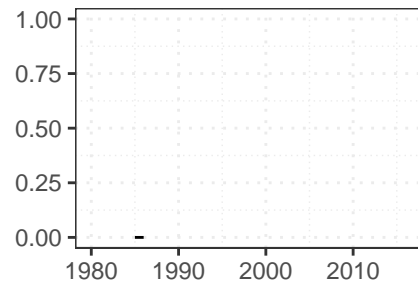

# Ecuador

VSPI-B

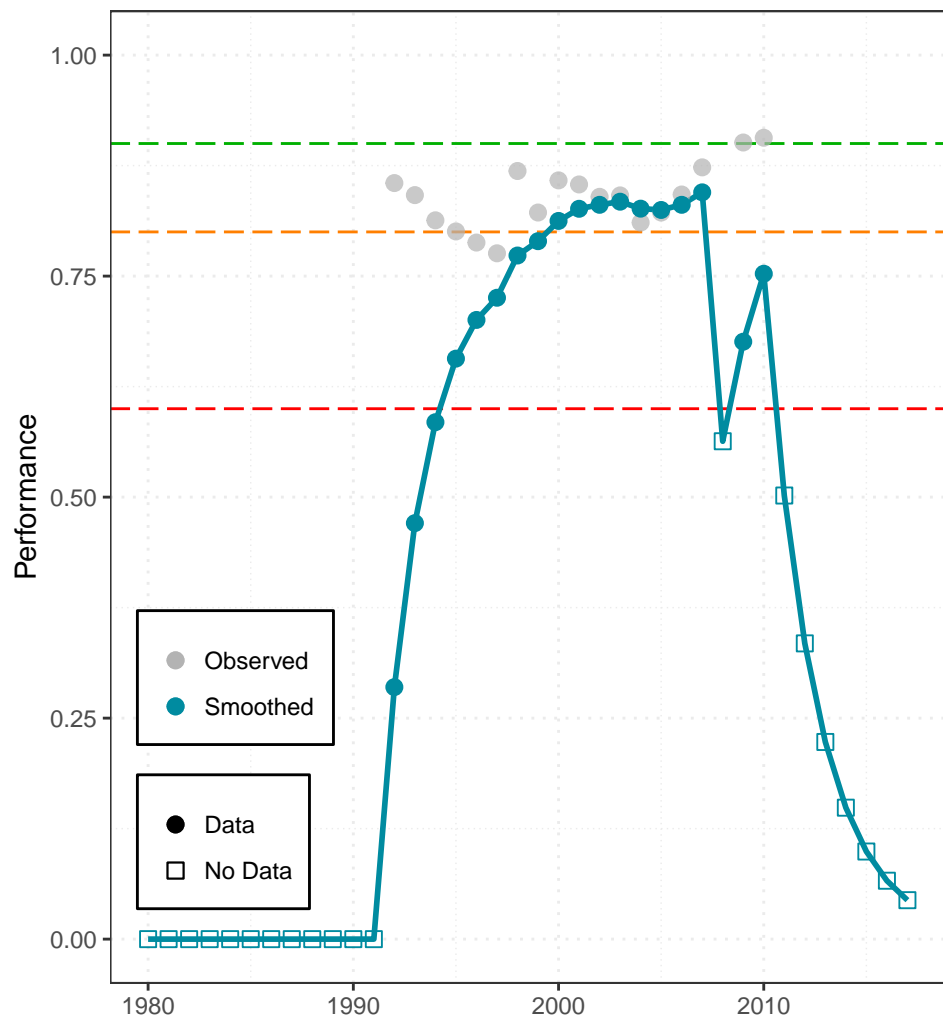

## Completeness

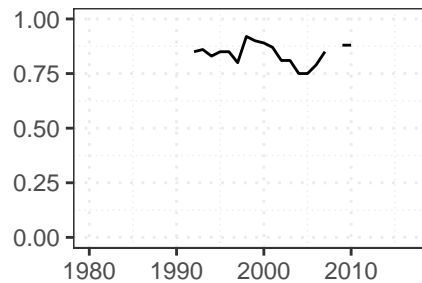

## Age Unspecified

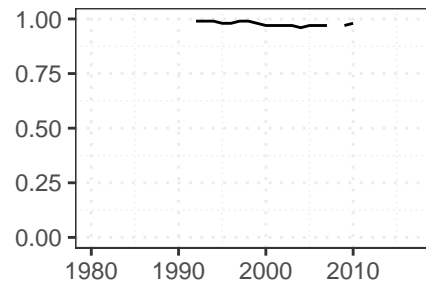

## Sex Unspecified

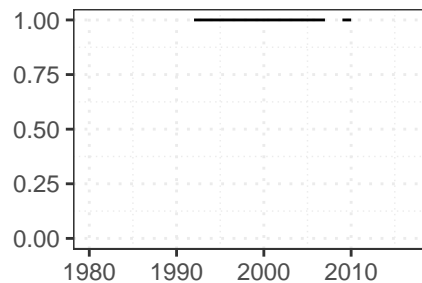

## Birth Order Unspecified

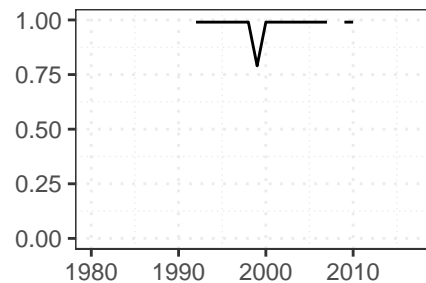

## Birth Weight Unspecified

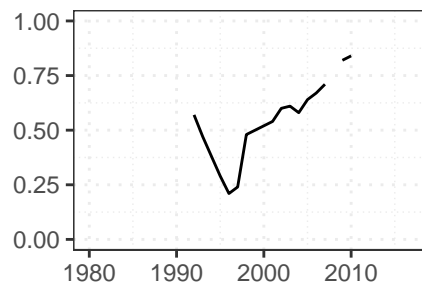

# Egypt

## VSPI-B

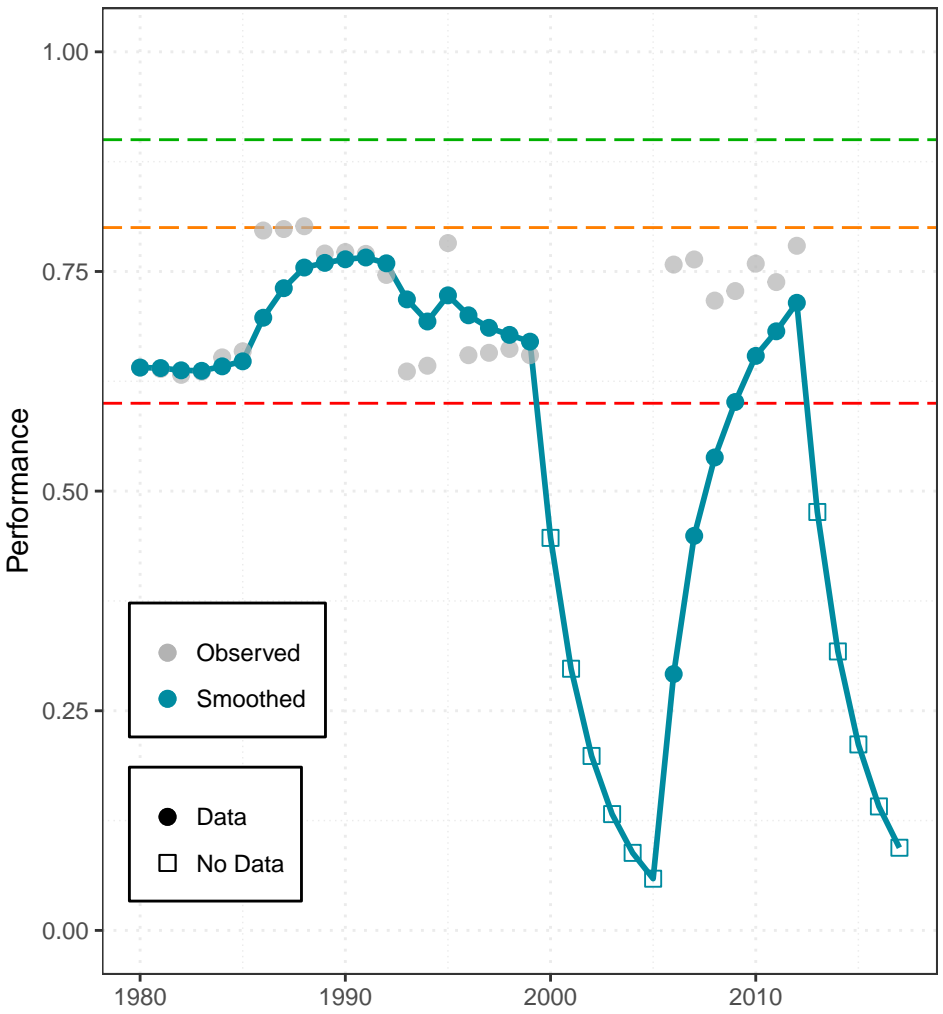

## Completeness

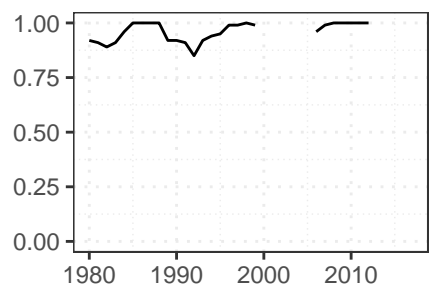

## Age Unspecified

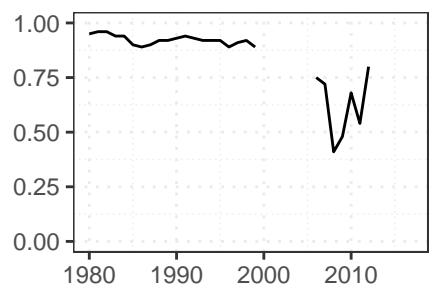

## Sex Unspecified

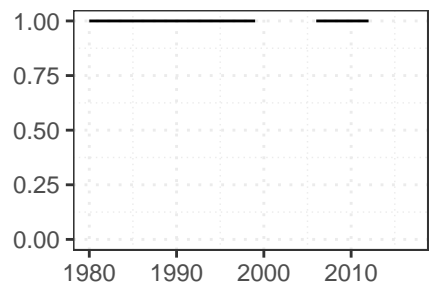

## Birth Order Unspecified

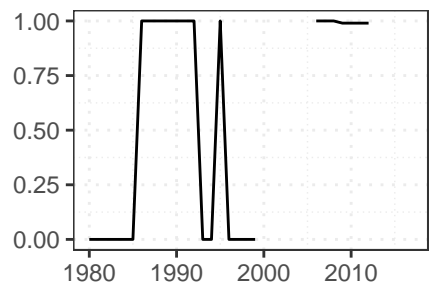

## Birth Weight Unspecified

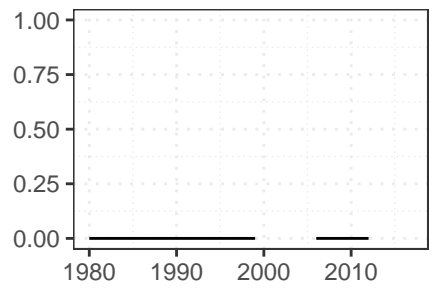

# Spain

VSPI-B

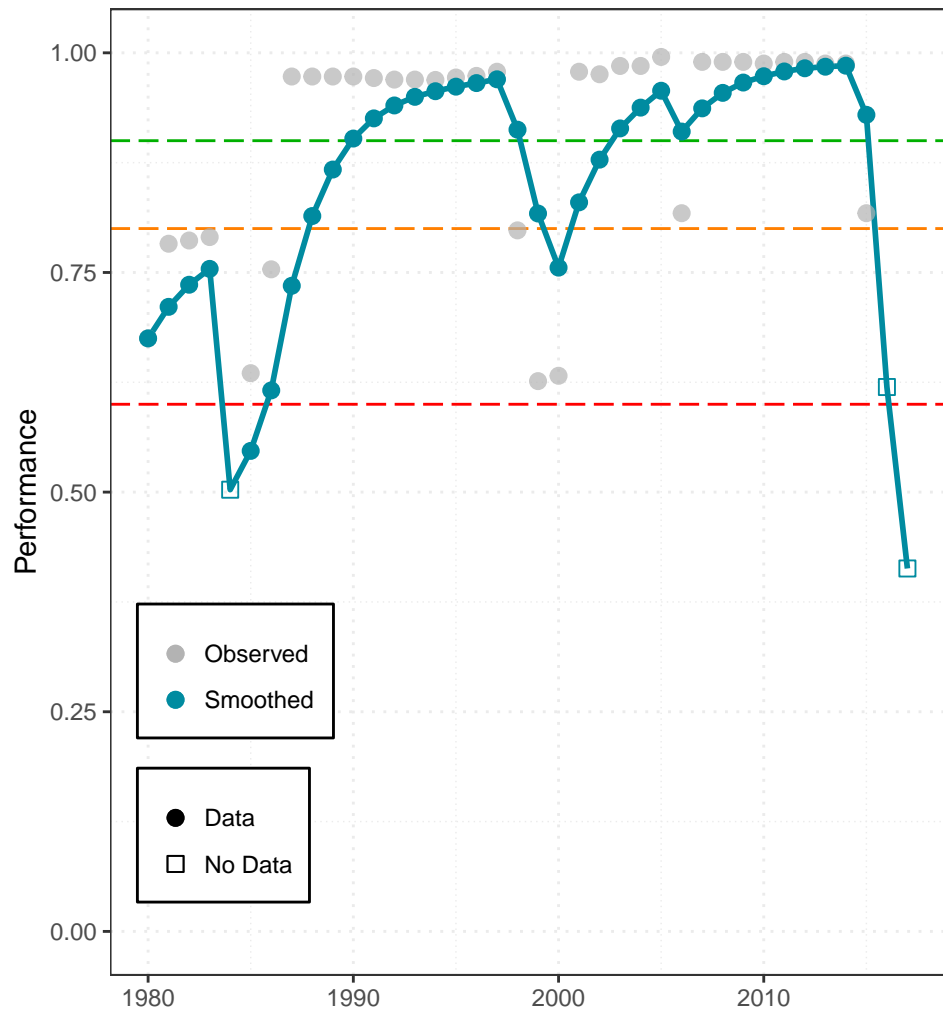

## Completeness

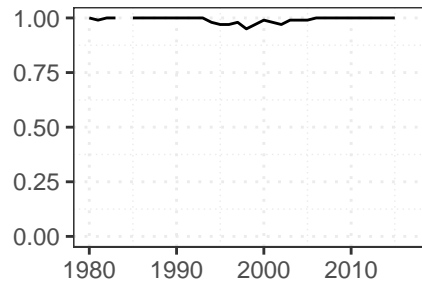

## Age Unspecified

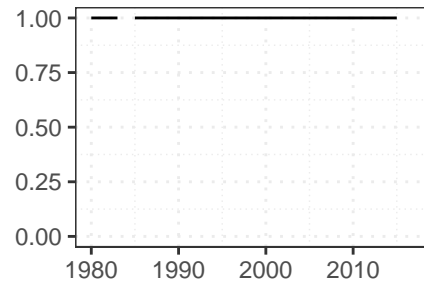

## Sex Unspecified

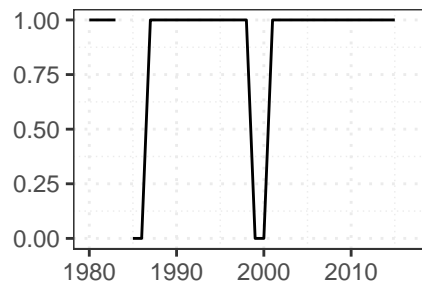

## Birth Order Unspecified

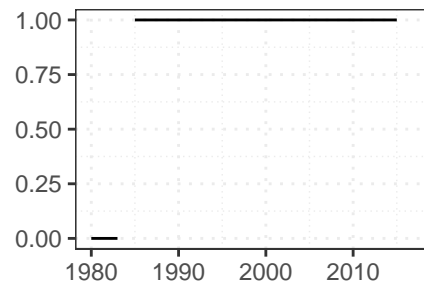

## Birth Weight Unspecified

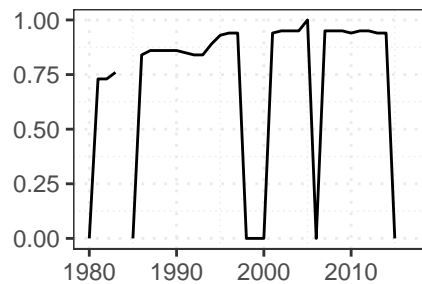

# Estonia

## VSPI-B

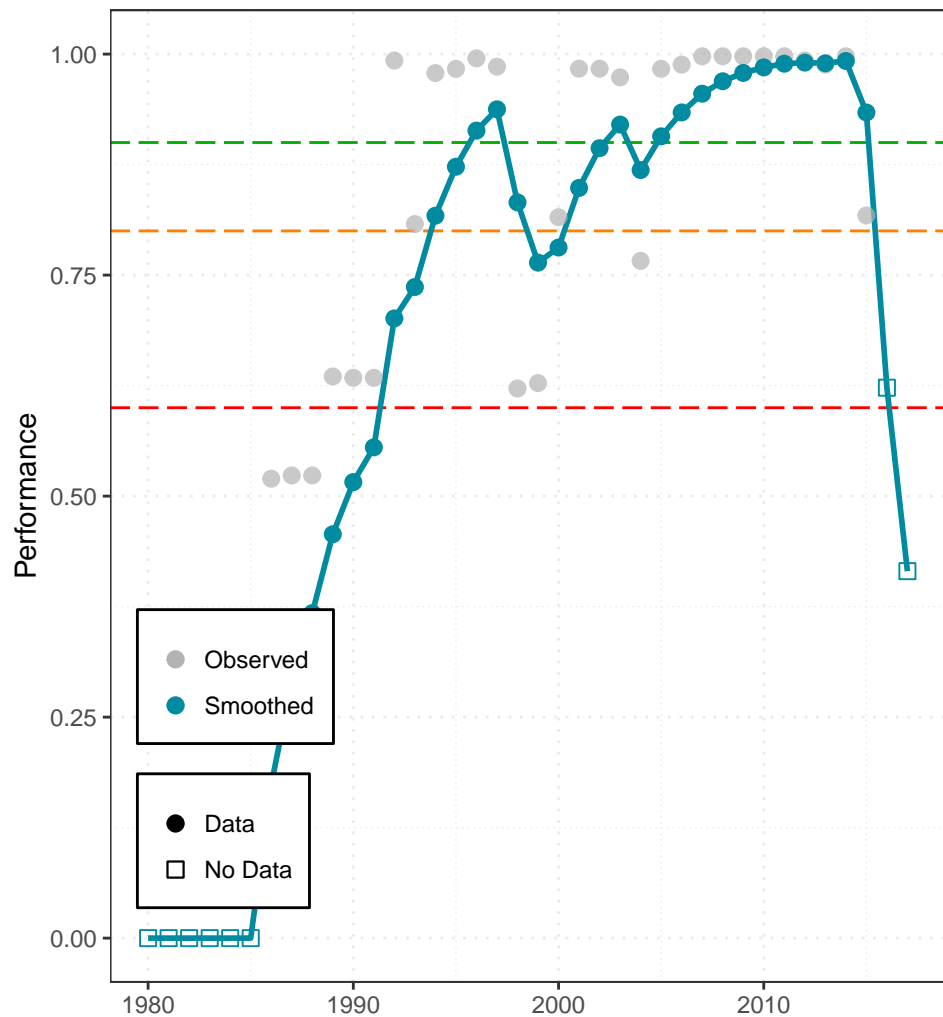

## Completeness

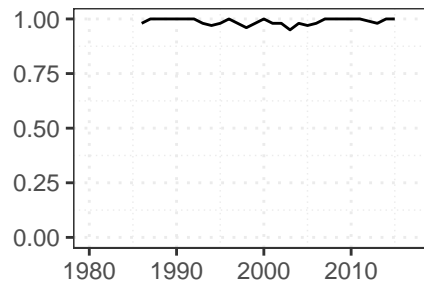

## Age Unspecified

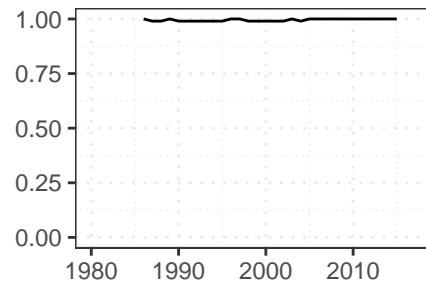

## Sex Unspecified

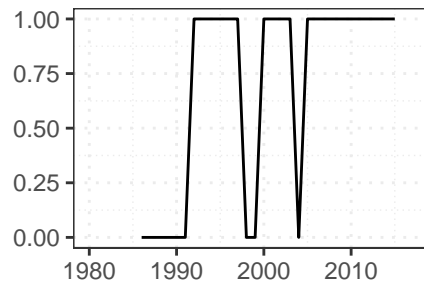

## Birth Order Unspecified

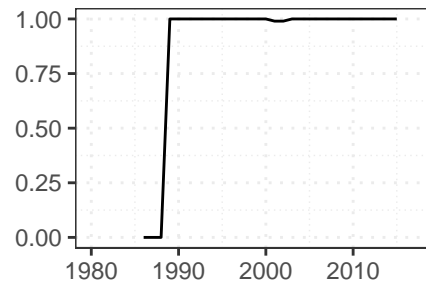

## Birth Weight Unspecified

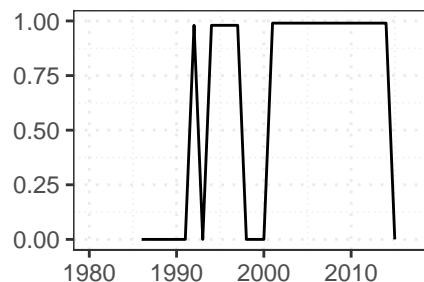

# Finland VSPI-B

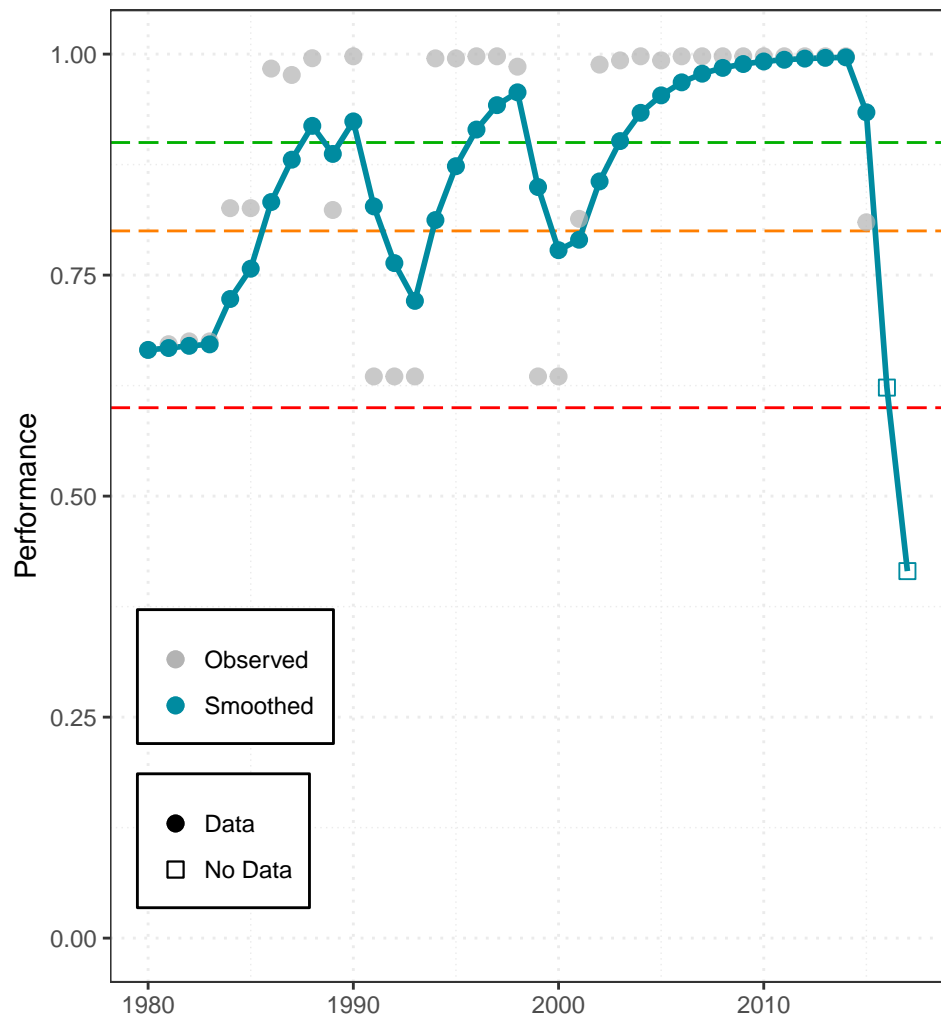

## Completeness

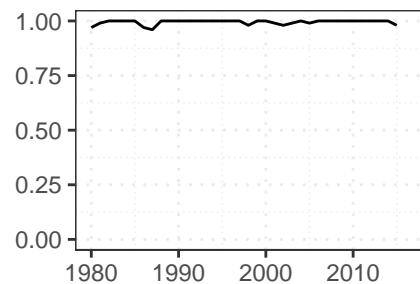

## Age Unspecified

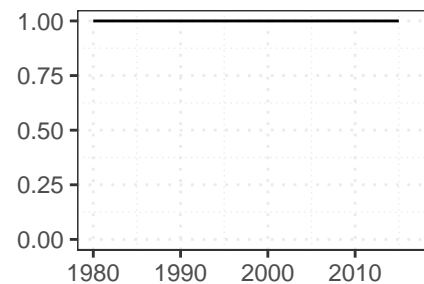

## Sex Unspecified

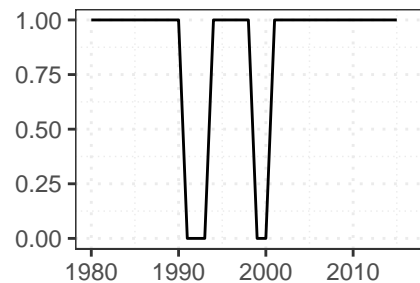

## Birth Order Unspecified

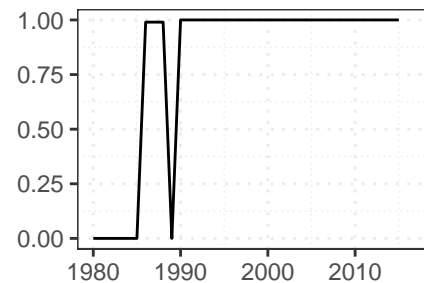

## Birth Weight Unspecified

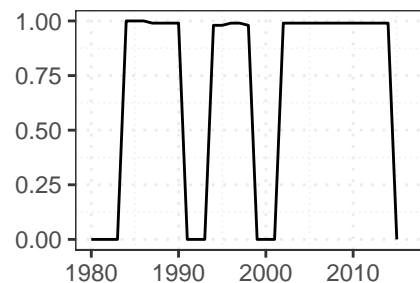



# Fiji

## VSPI-B

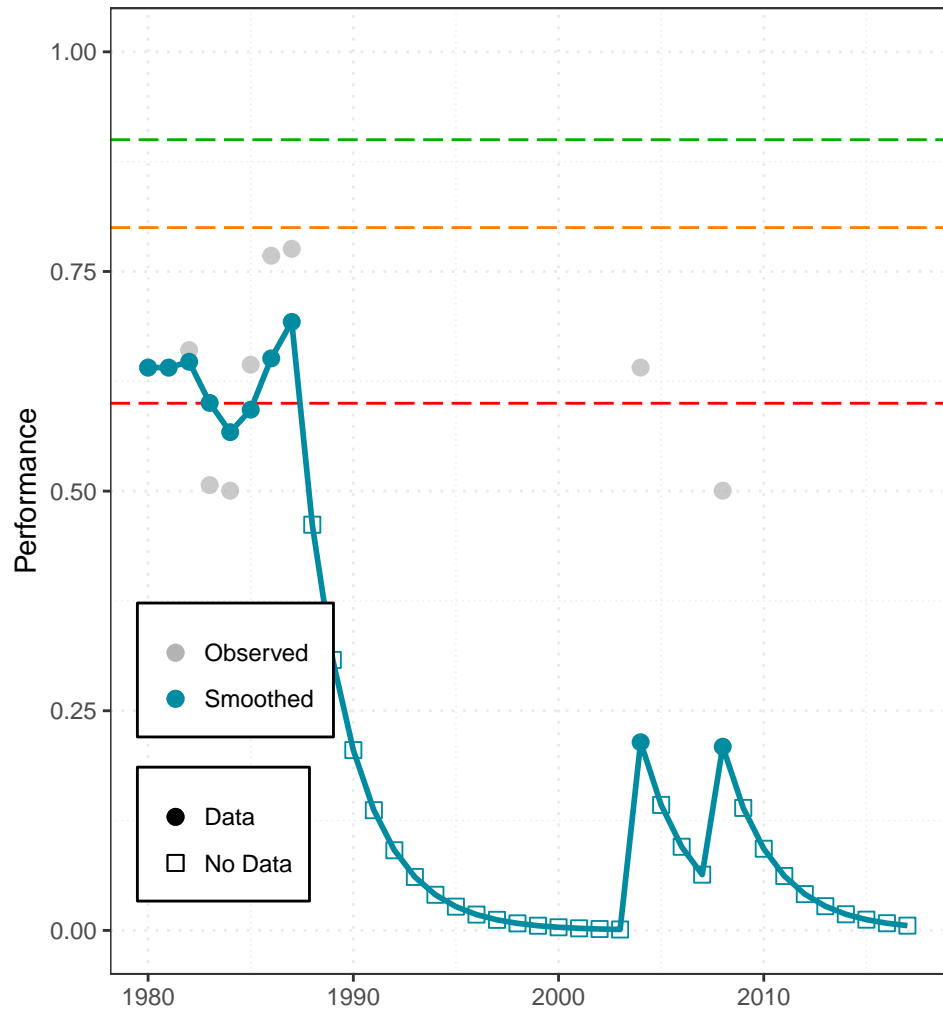

## Completeness

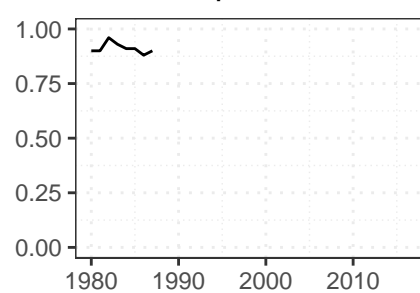

## Age Unspecified

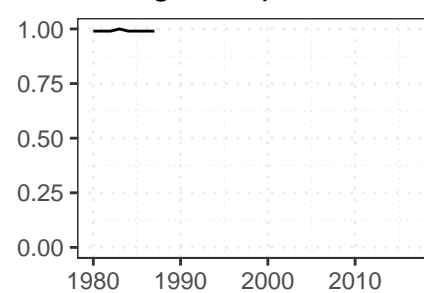

## Sex Unspecified

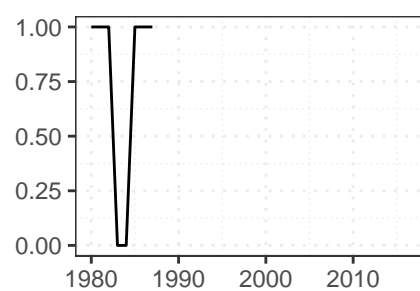

## Birth Order Unspecified

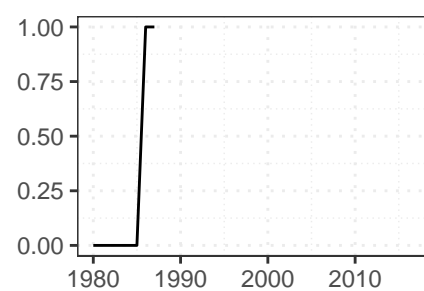

## Birth Weight Unspecified

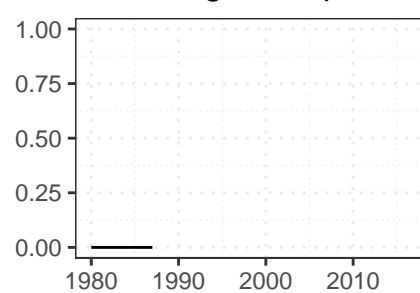

# France VSPI-B

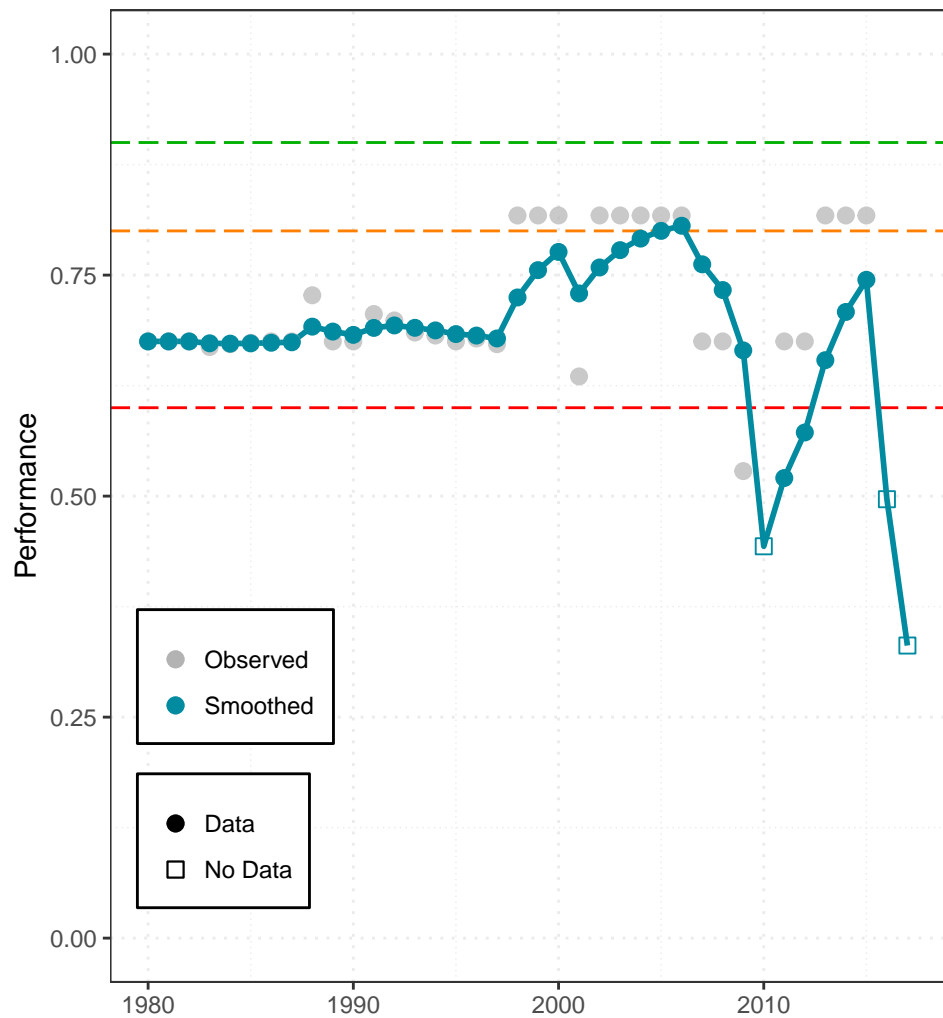

## Completeness

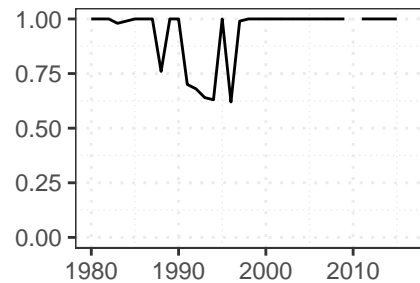

## Age Unspecified

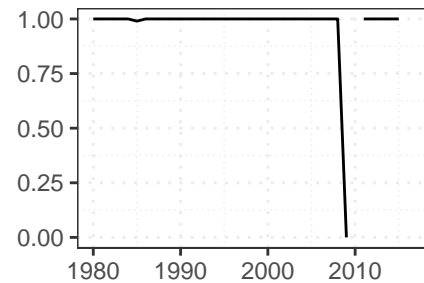

## Sex Unspecified

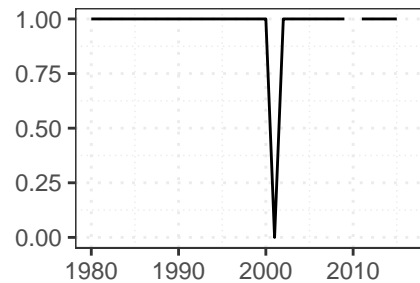

## Birth Order Unspecified

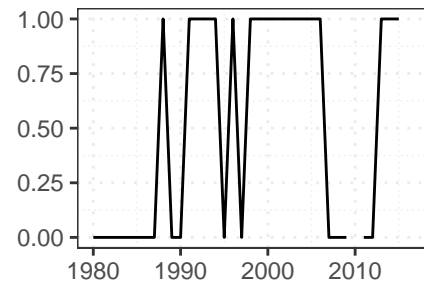

## Birth Weight Unspecified

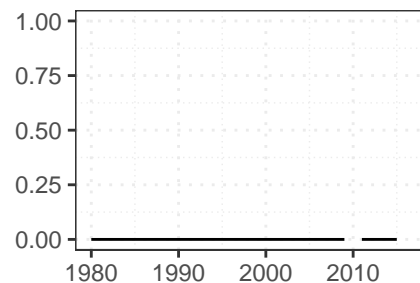

# United Kingdom

VSPI-B

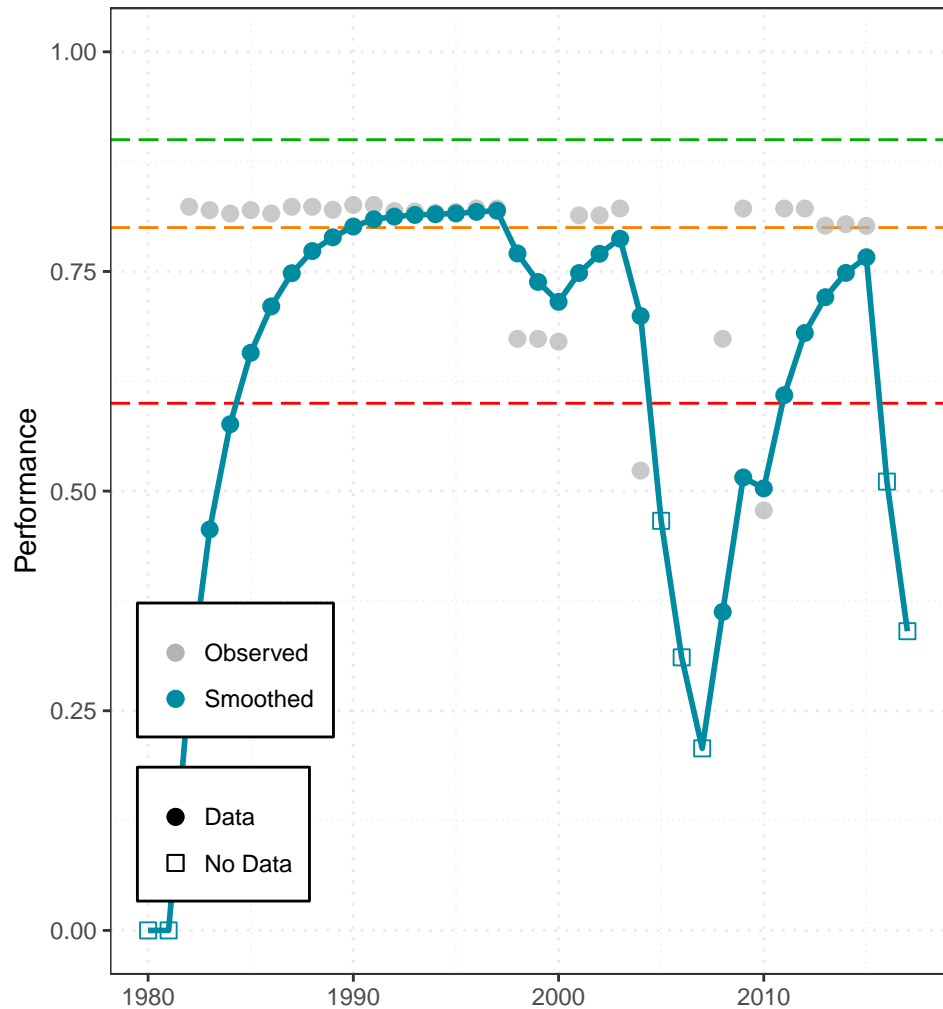

## Completeness

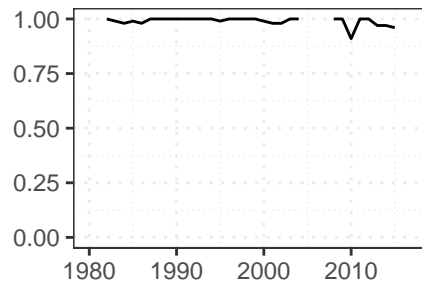

## Age Unspecified

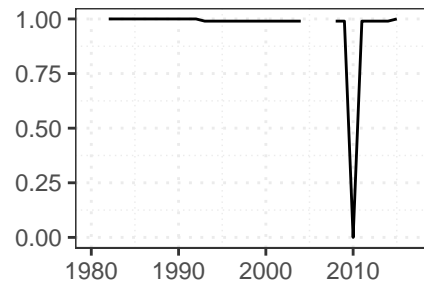

## Sex Unspecified

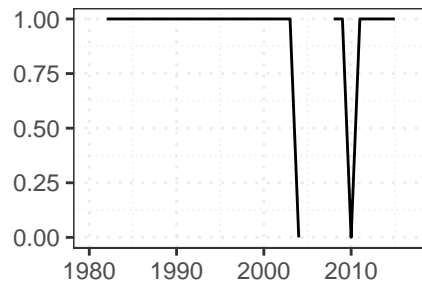

## Birth Order Unspecified

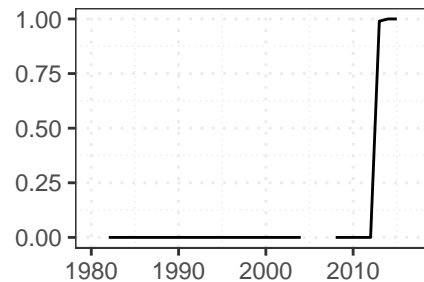

## Birth Weight Unspecified

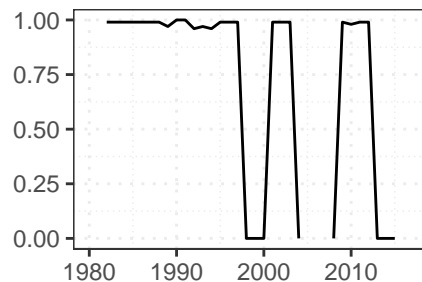

# Georgia

VSPI-B

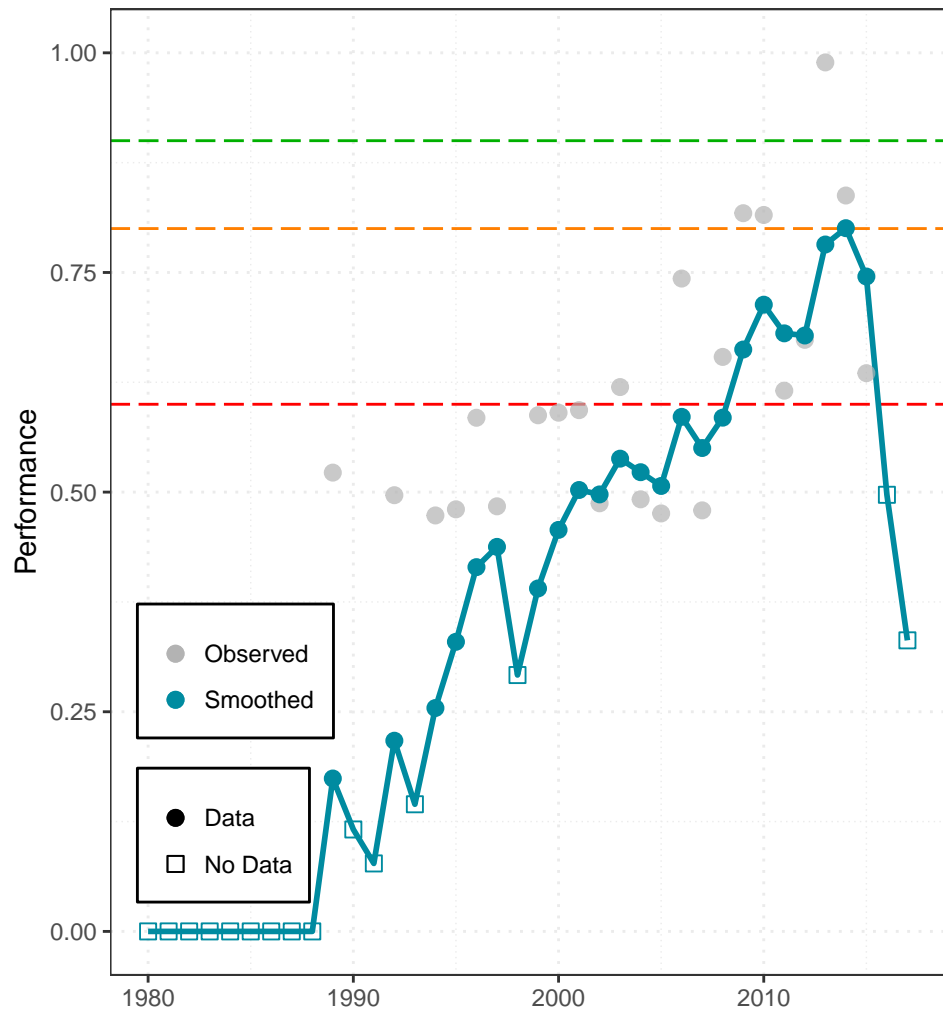

## Completeness

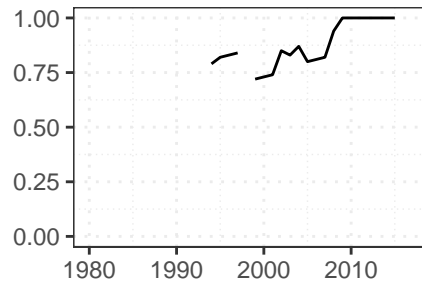

## Age Unspecified

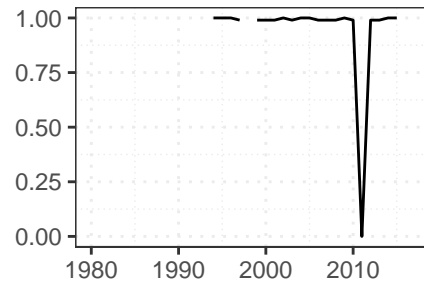

## Sex Unspecified

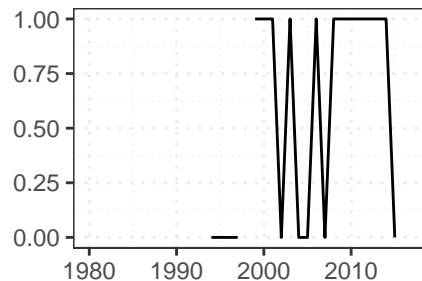

## Birth Order Unspecified

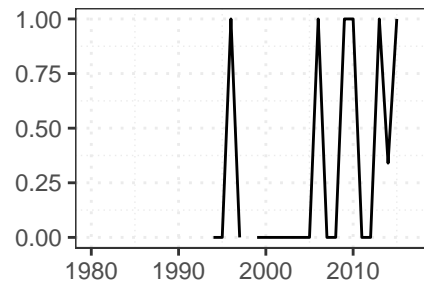

## Birth Weight Unspecified

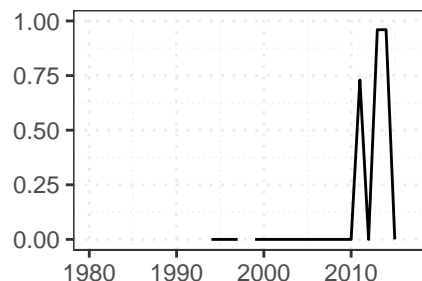

# Greece

VSPI-B

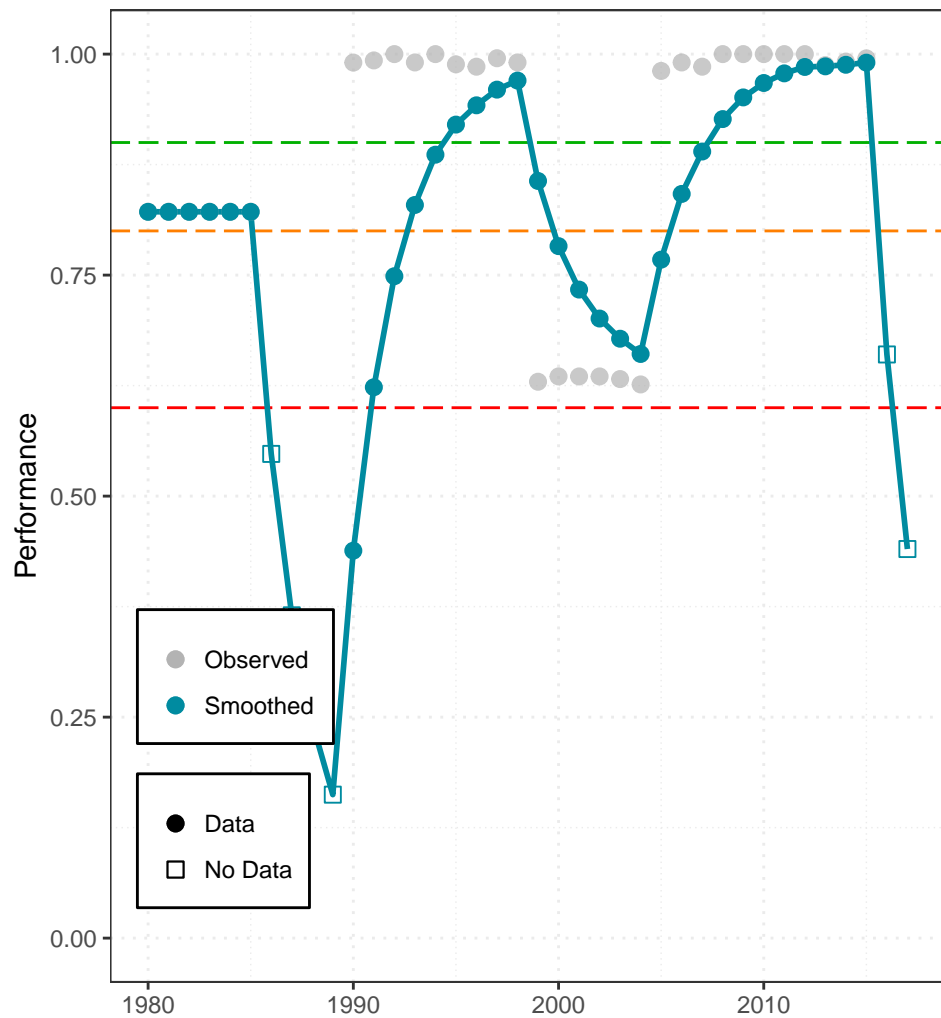

# Completeness

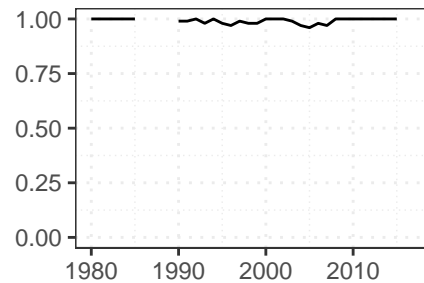

# Age Unspecified

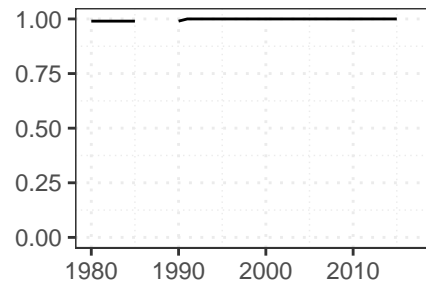

# Sex Unspecified

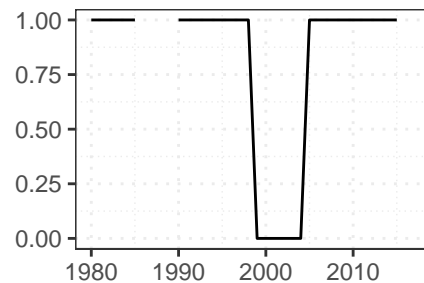

# Birth Order Unspecified

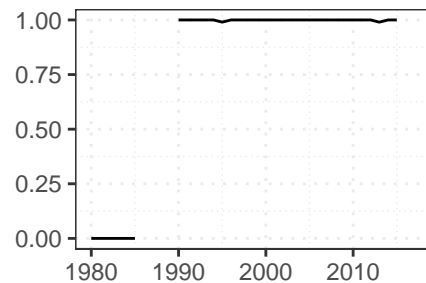

# Birth Weight Unspecified

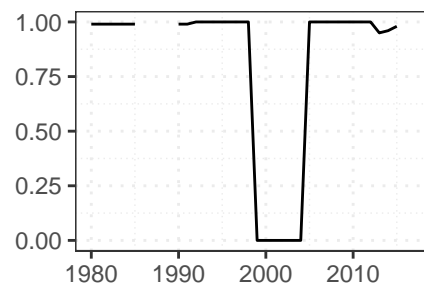

# Grenada

VSPI-B

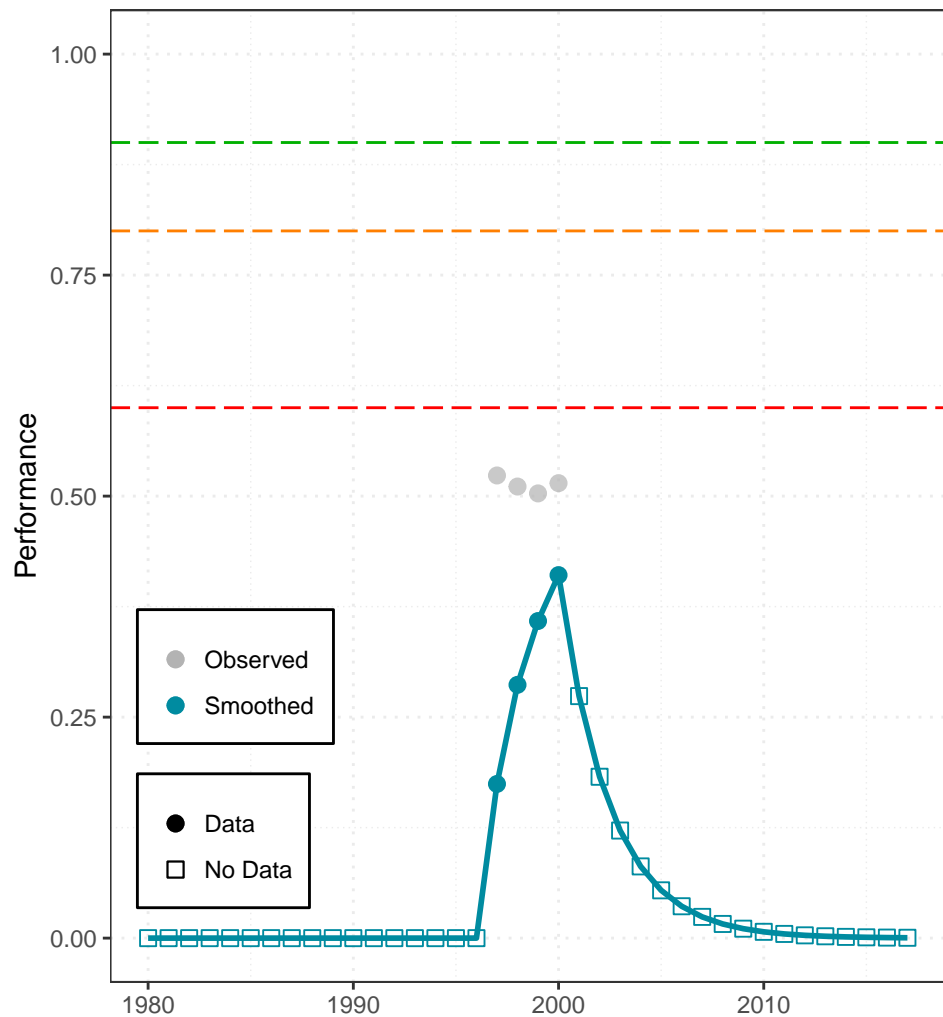

# Completeness

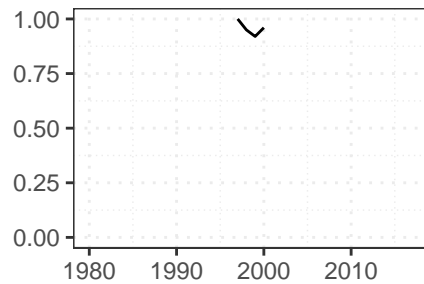

# Age Unspecified

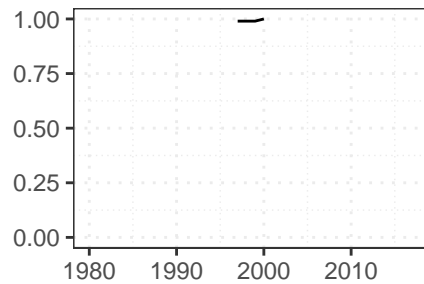

# Sex Unspecified

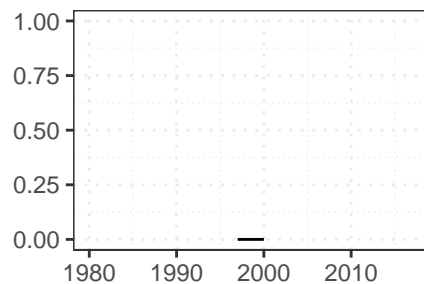

# Birth Order Unspecified



# Birth Weight Unspecified

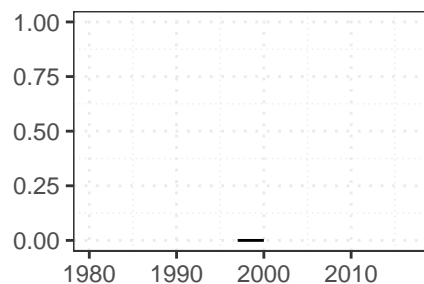

# Guatemala

VSPI-B

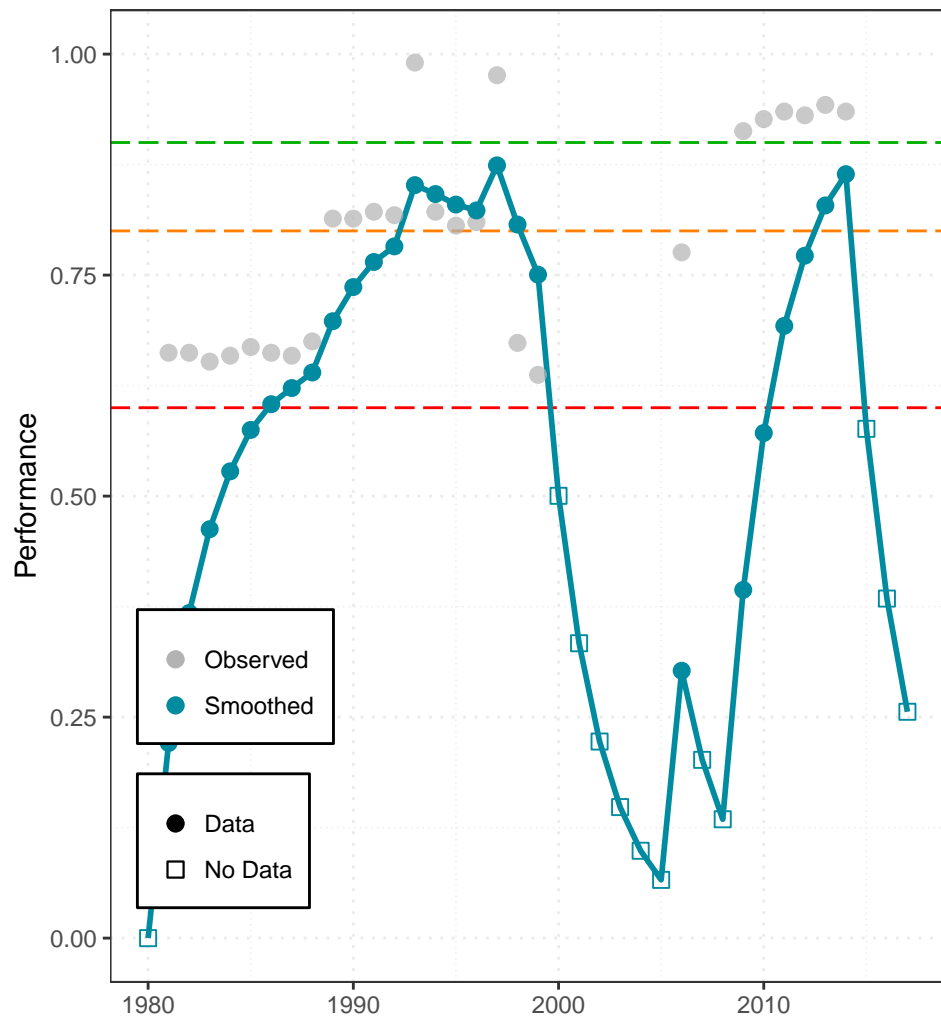

## Completeness

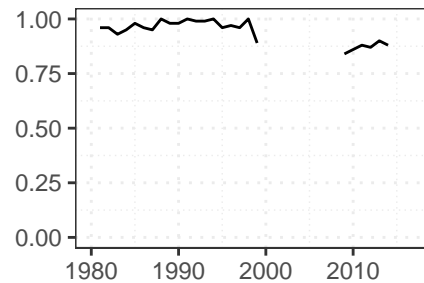

## Age Unspecified

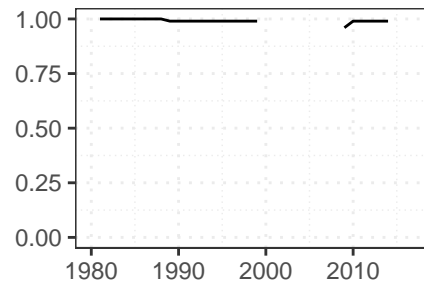

## Sex Unspecified

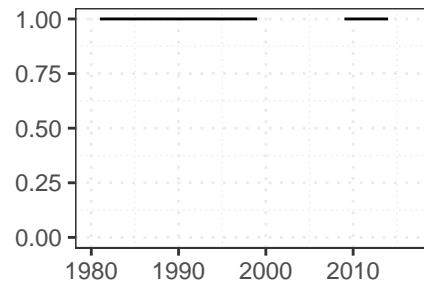

## Birth Order Unspecified

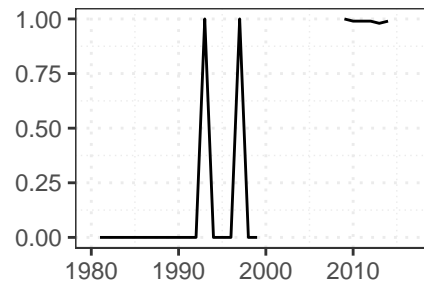

## Birth Weight Unspecified

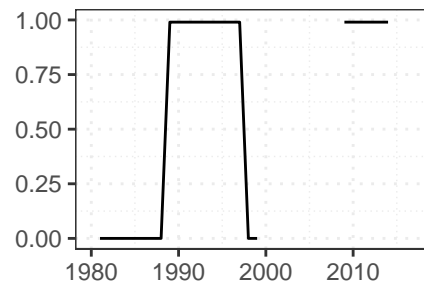

# Hong Kong

## VSPI-B

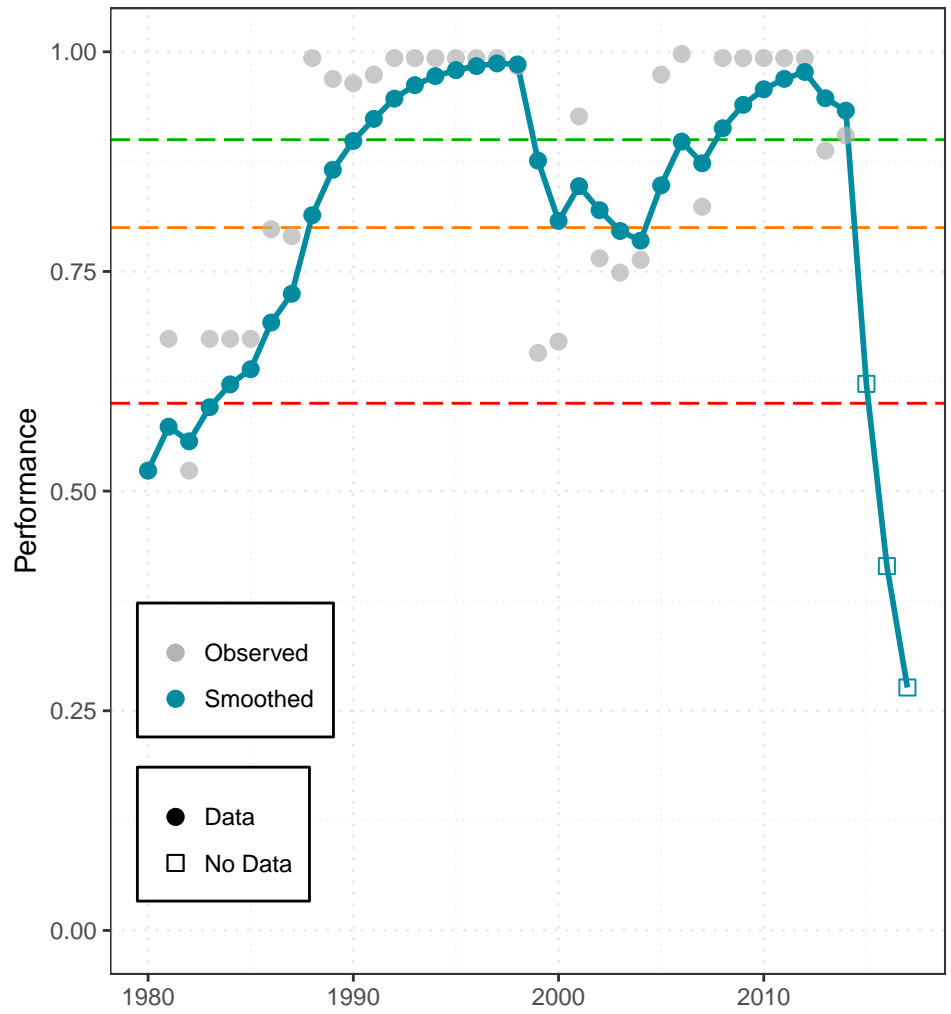

## Completeness

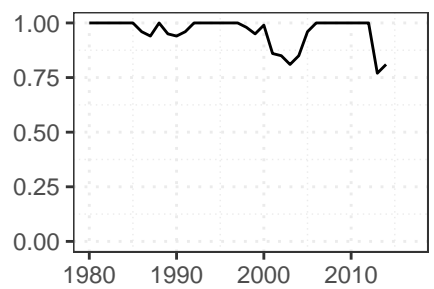

## Age Unspecified

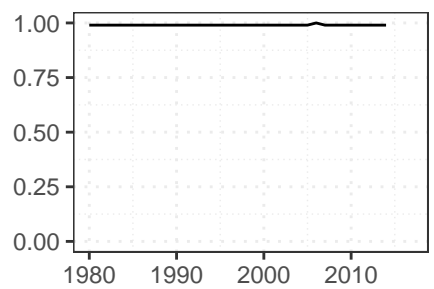

## Sex Unspecified

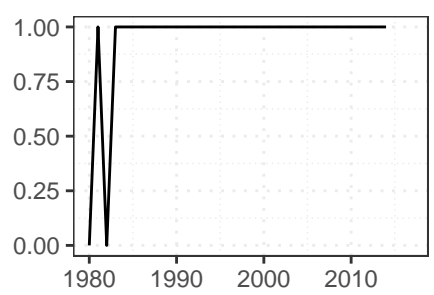

## Birth Order Unspecified

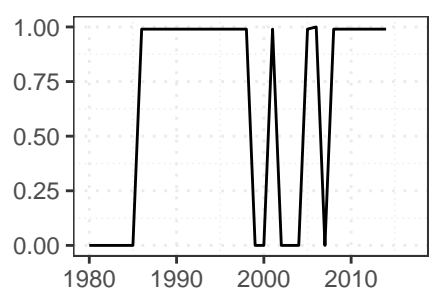

## Birth Weight Unspecified

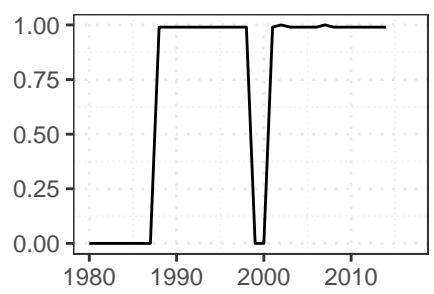



# Croatia

VSPI-B

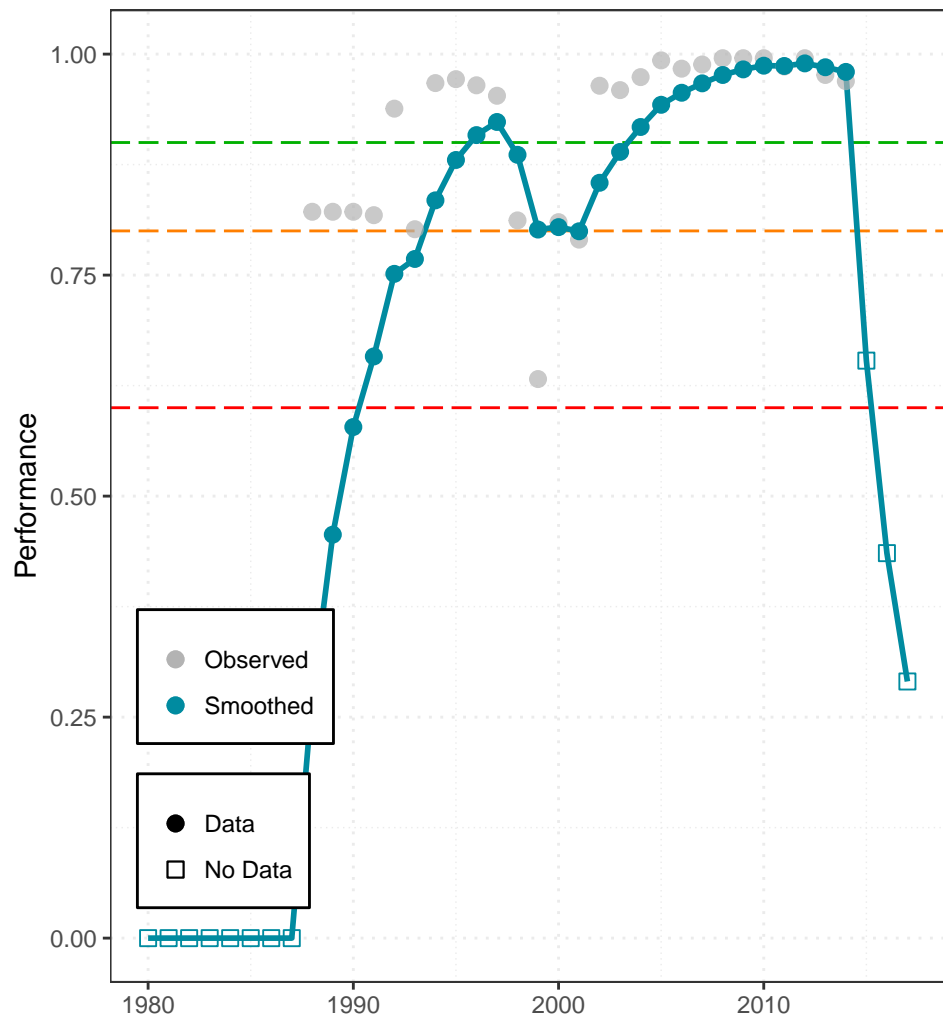

# Completeness

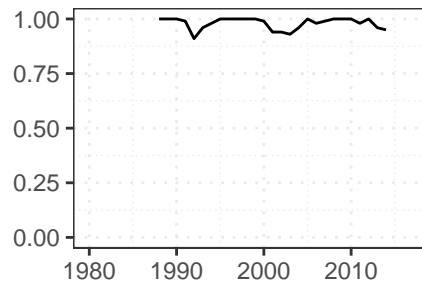

# Age Unspecified

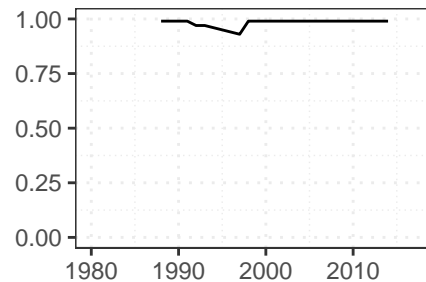

# Sex Unspecified

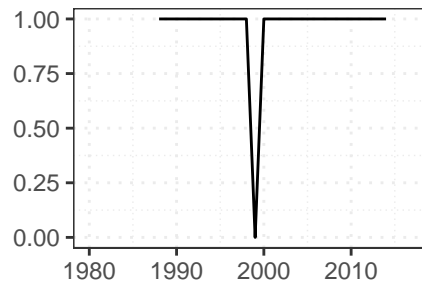

# Birth Order Unspecified

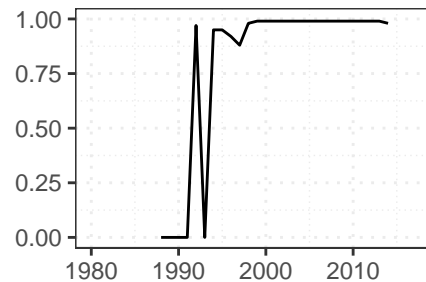

# Birth Weight Unspecified

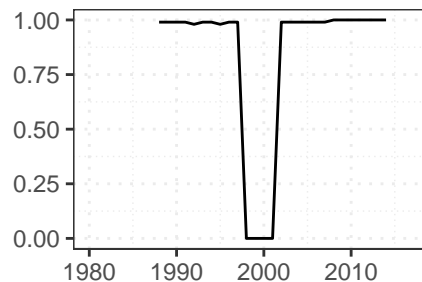

# Hungary

VSPI-B

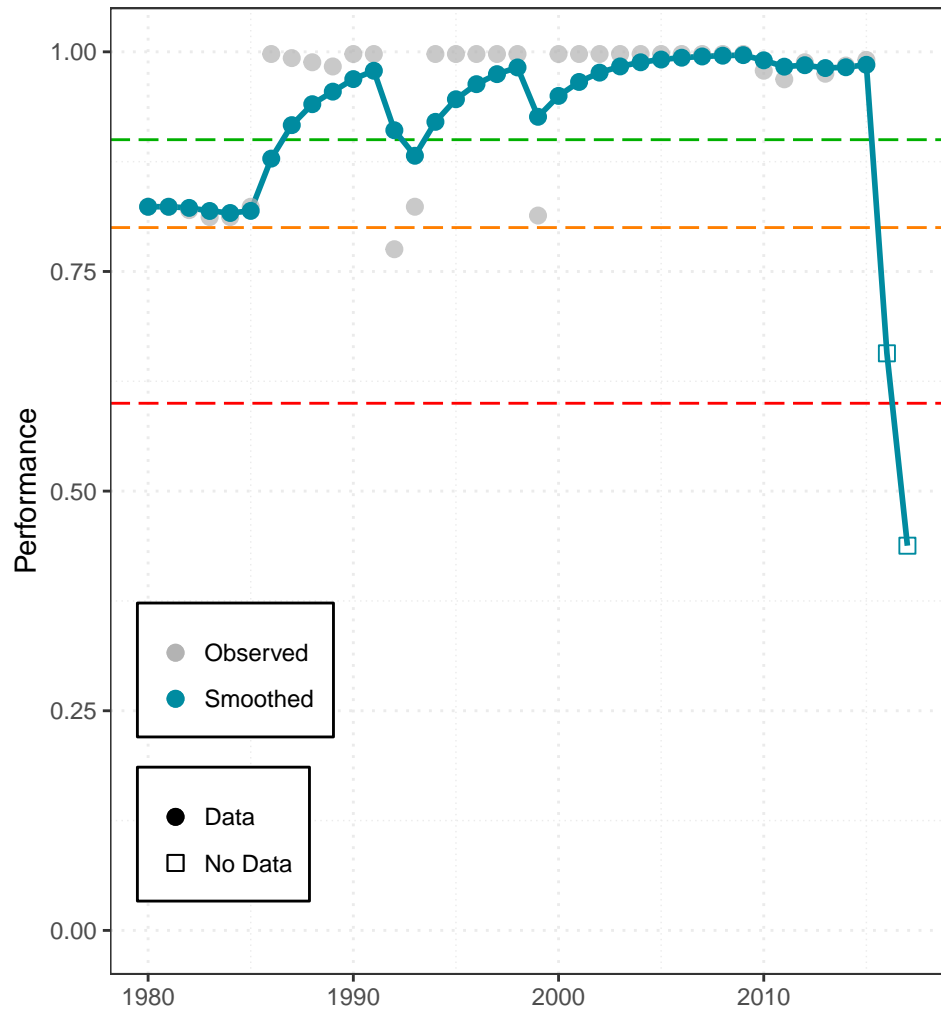

## Completeness

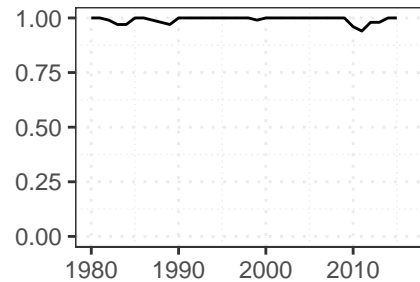

## Age Unspecified

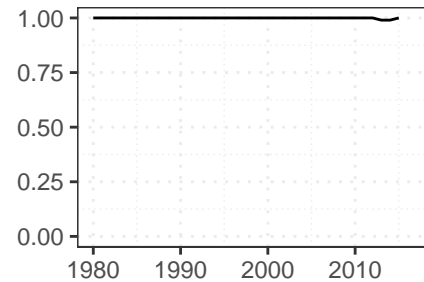

## Sex Unspecified

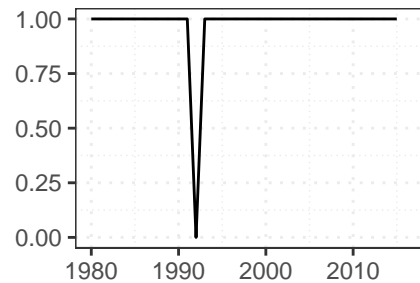

## Birth Order Unspecified

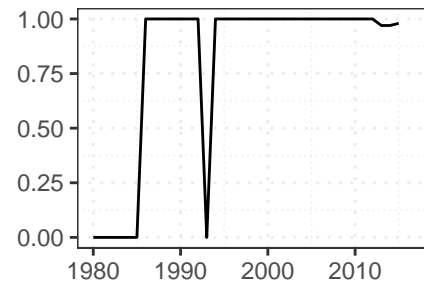

## Birth Weight Unspecified

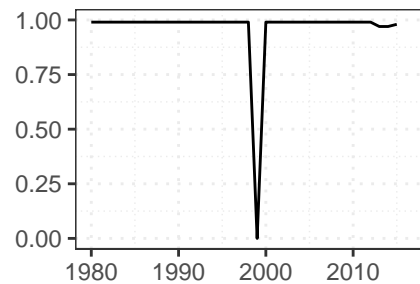

# India VSPI-B

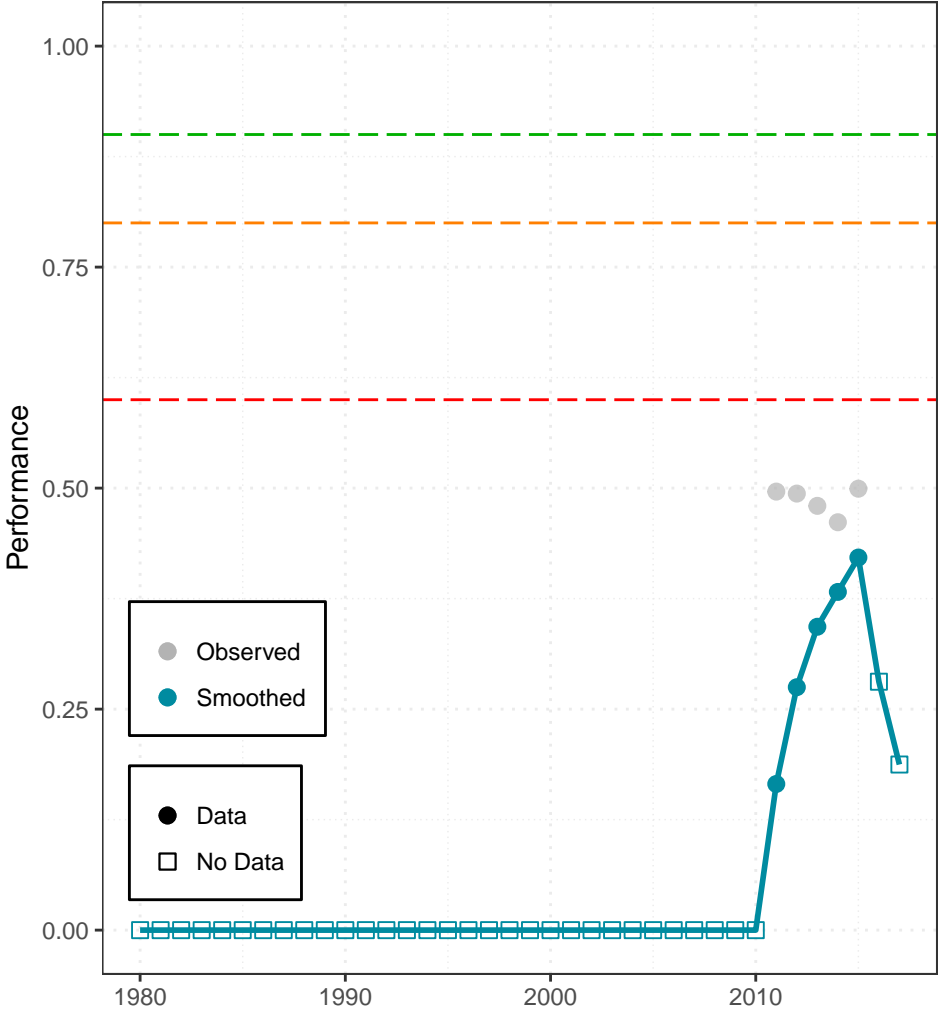

## Completeness

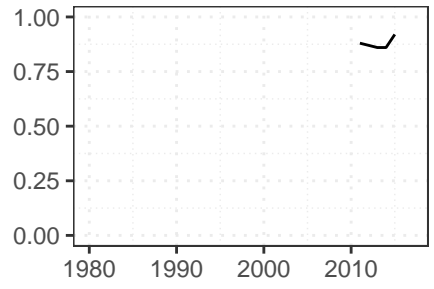

## Age Unspecified

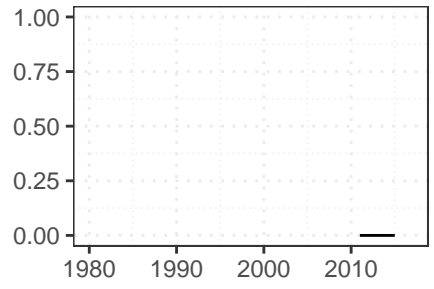

## Sex Unspecified

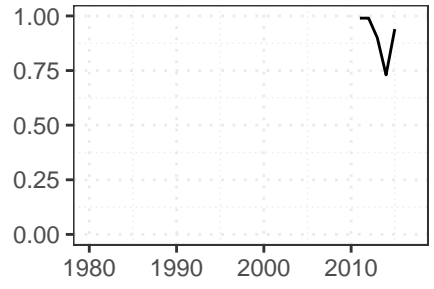

## Birth Order Unspecified

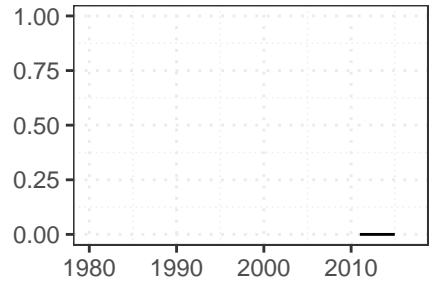

## Birth Weight Unspecified

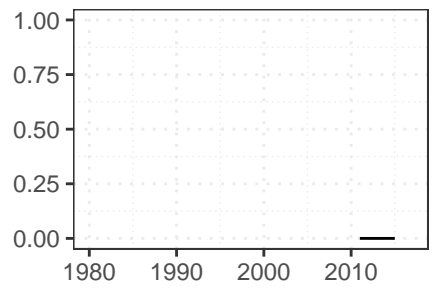

# Ireland

## VSPI-B

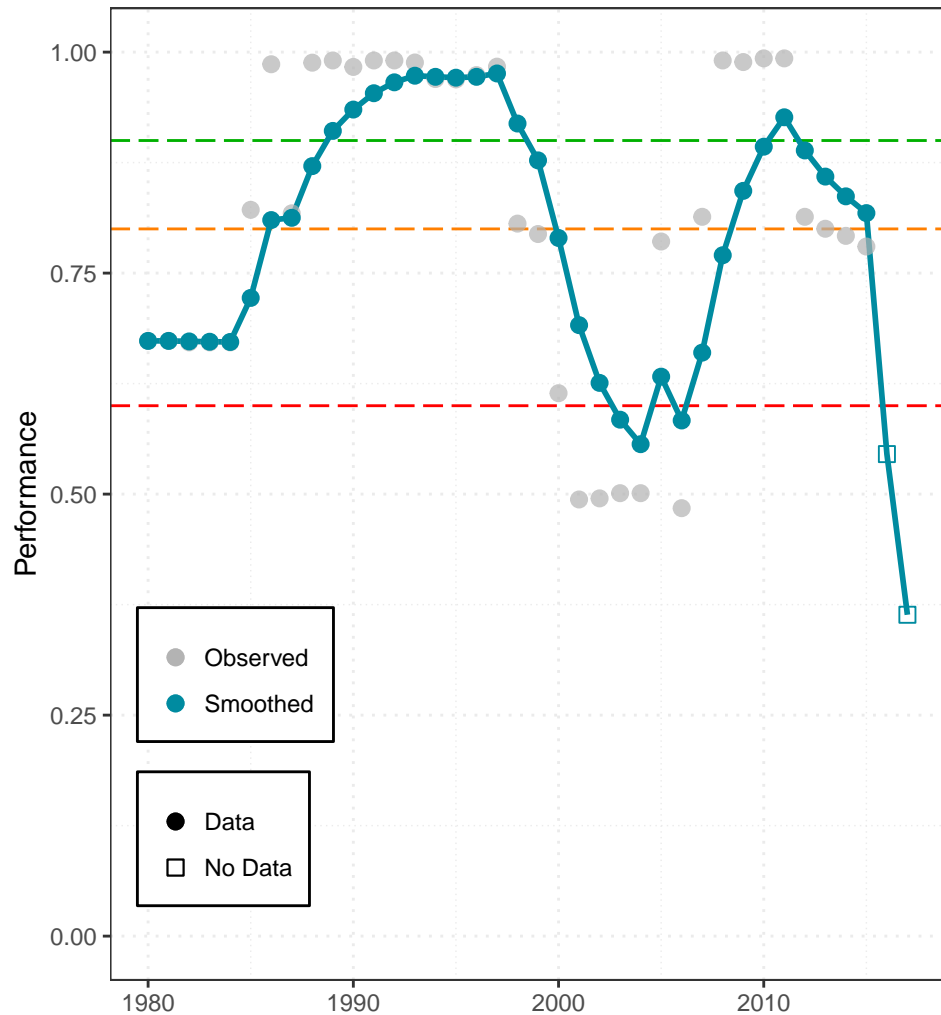

## Completeness

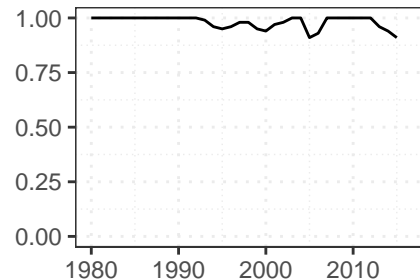

## Age Unspecified

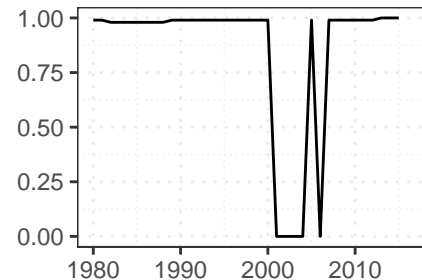

## Sex Unspecified

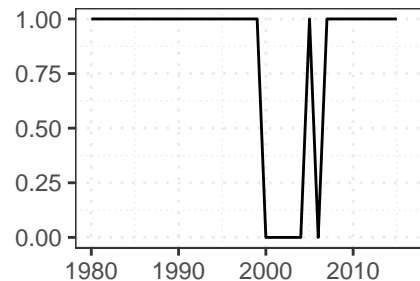

## Birth Order Unspecified

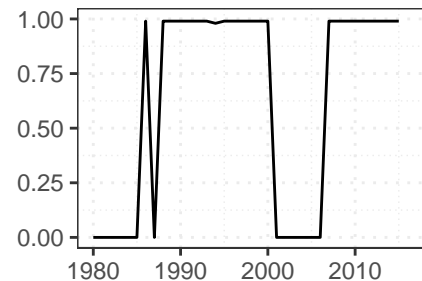

## Birth Weight Unspecified

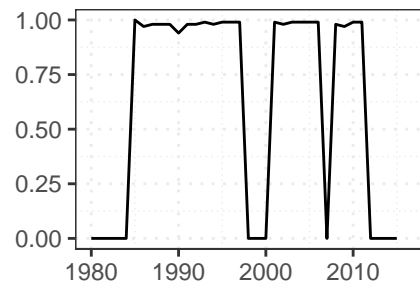

# Iran VSPI-B

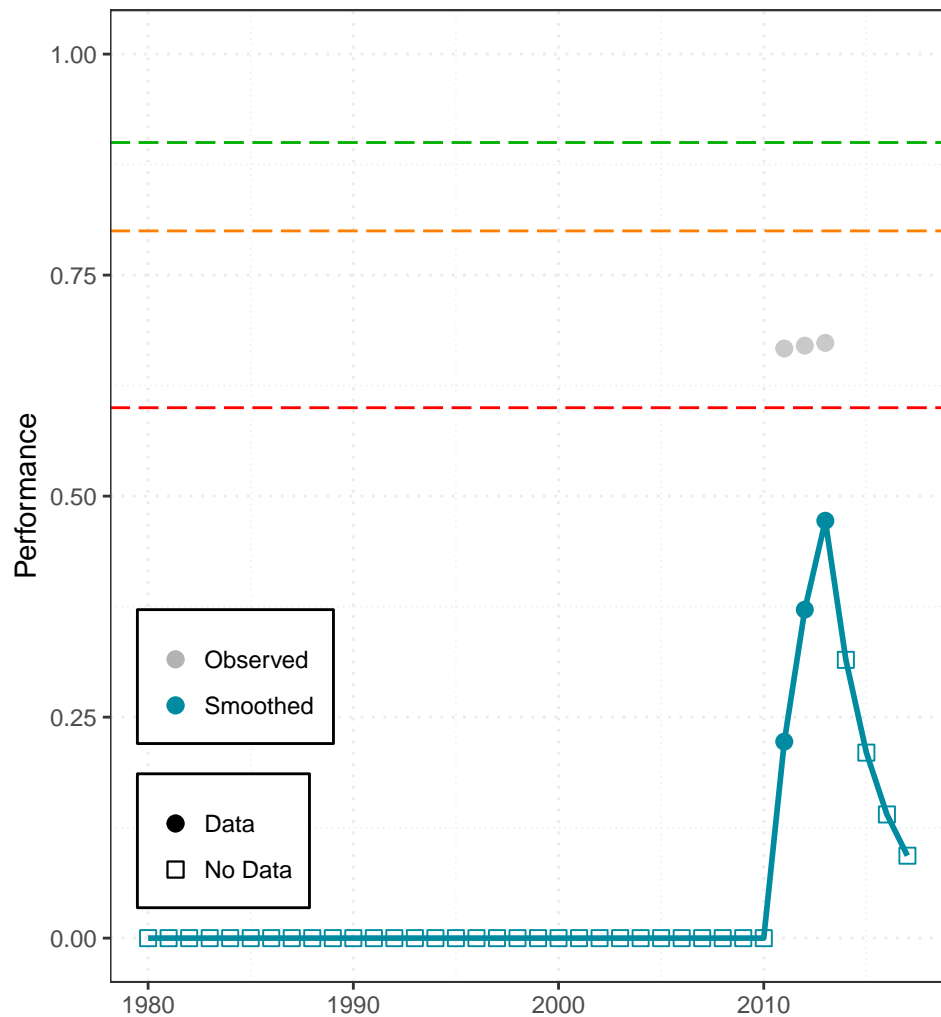

## Completeness

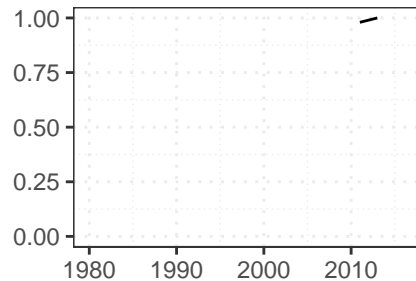

## Age Unspecified

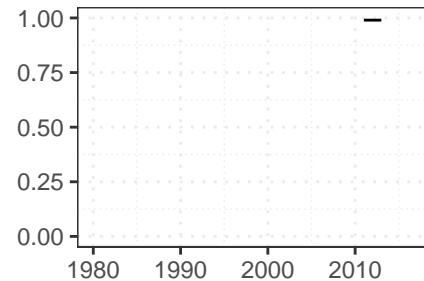

## Sex Unspecified

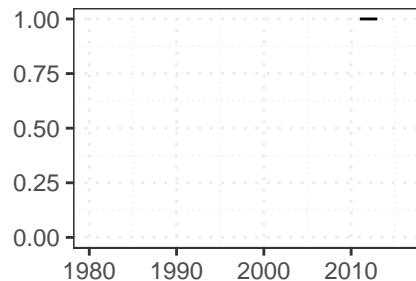

## Birth Order Unspecified

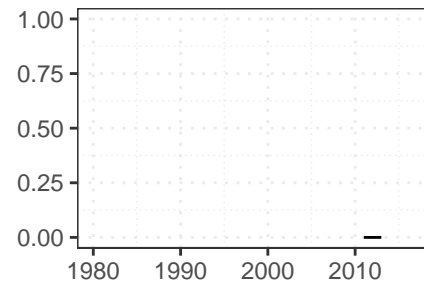

## Birth Weight Unspecified

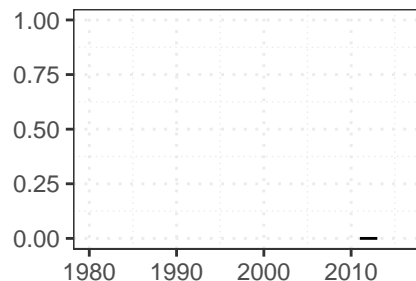

# Iceland VSPI-B

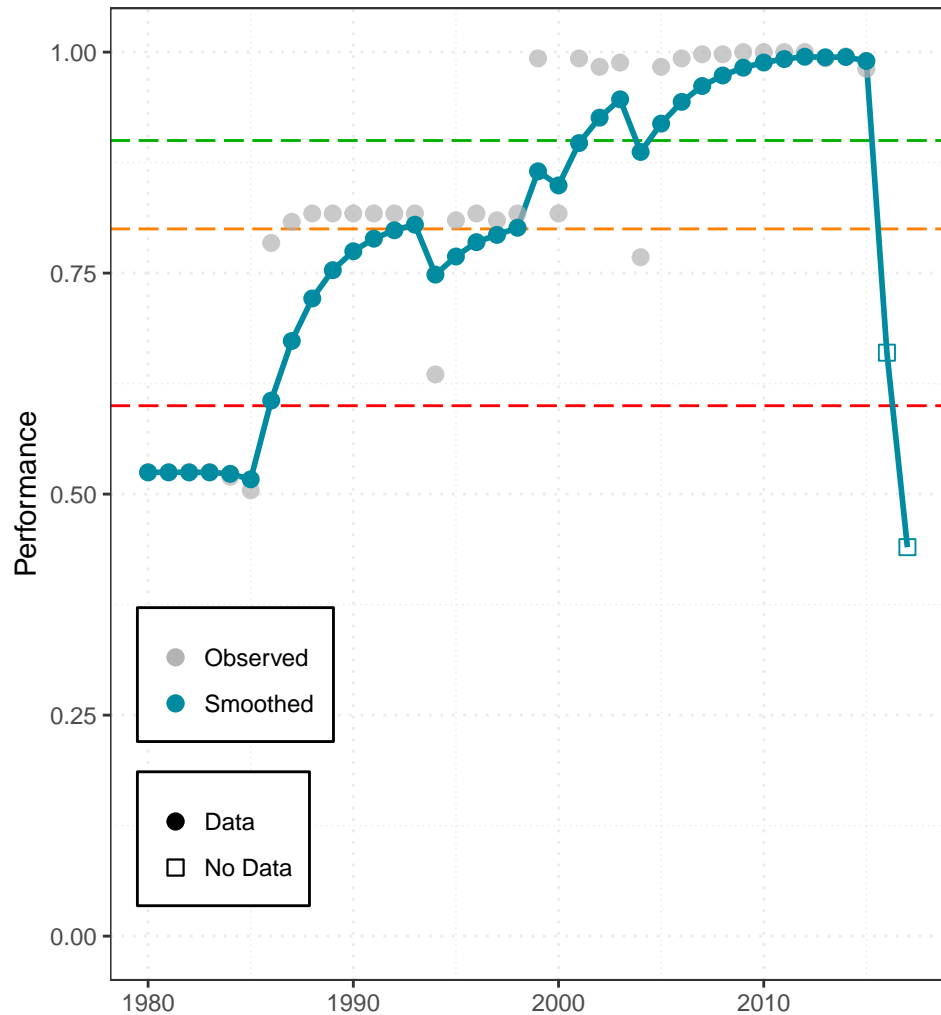

## Completeness

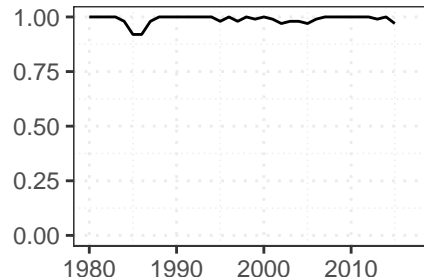

## Age Unspecified

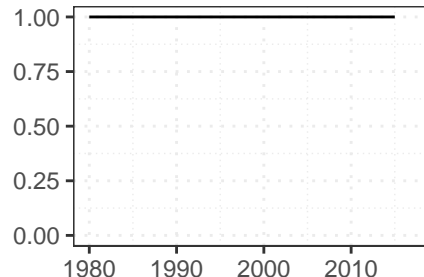

## Sex Unspecified

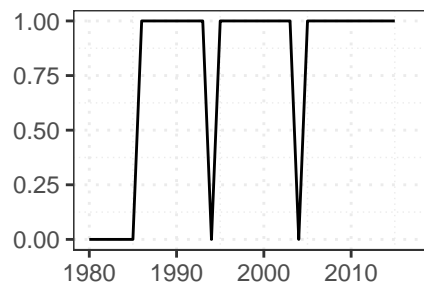

## Birth Order Unspecified

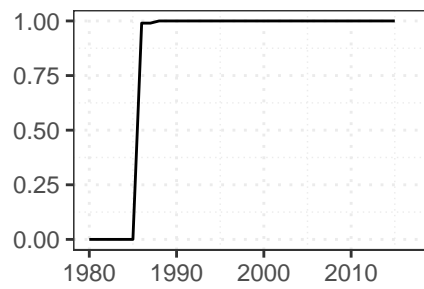

## Birth Weight Unspecified

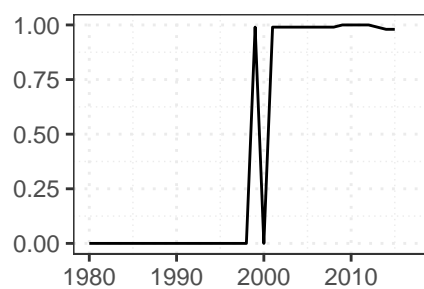

# Israel VSPI-B

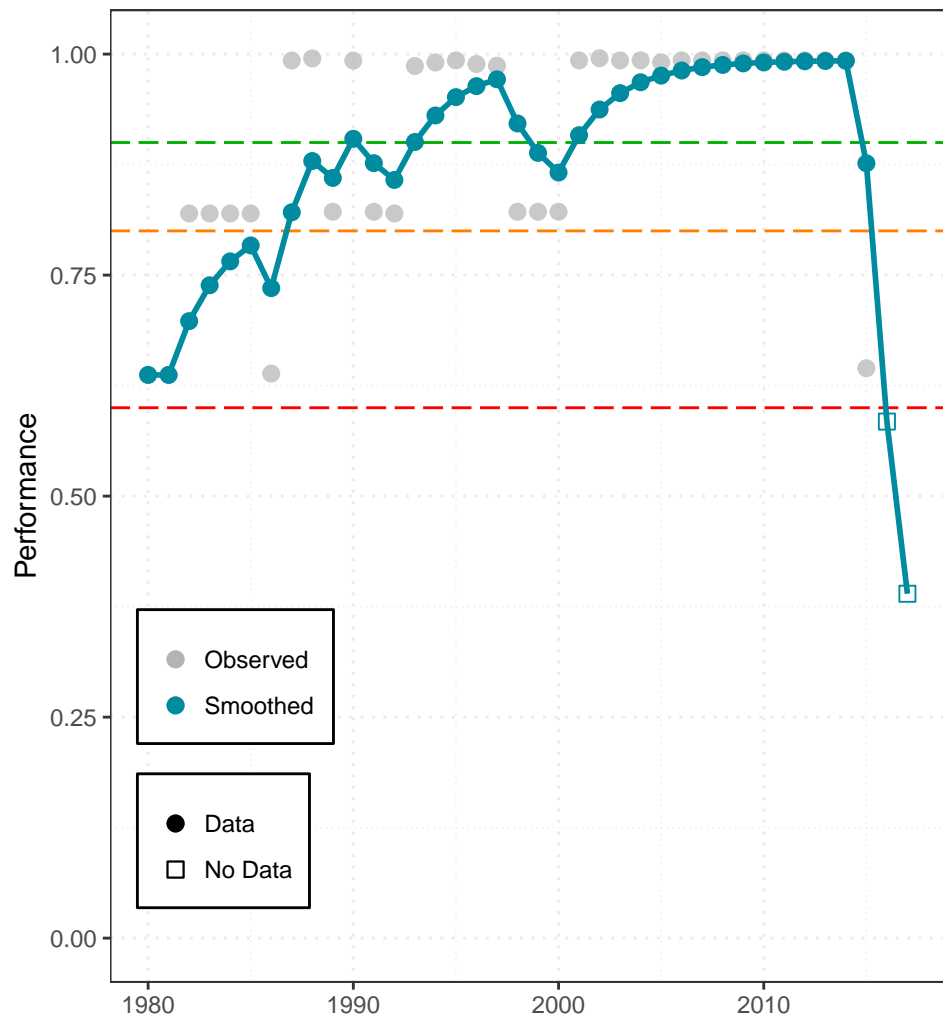

## Completeness

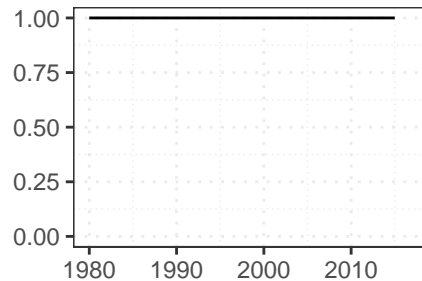

## Age Unspecified

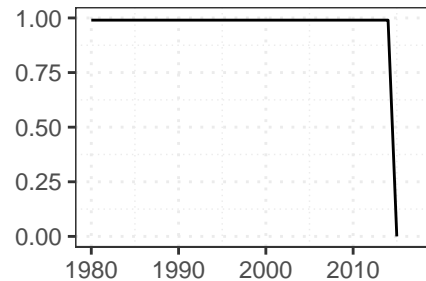

## Sex Unspecified

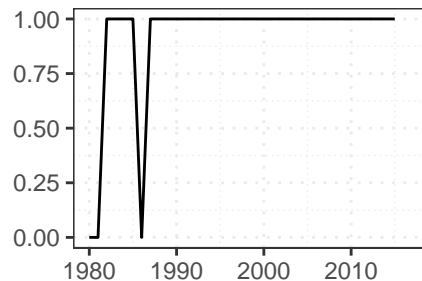

## Birth Order Unspecified

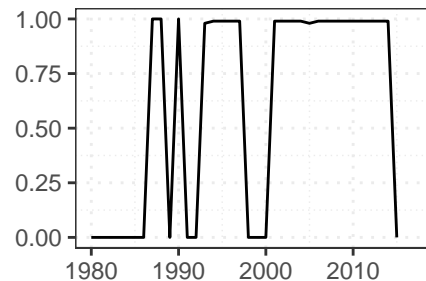

## Birth Weight Unspecified

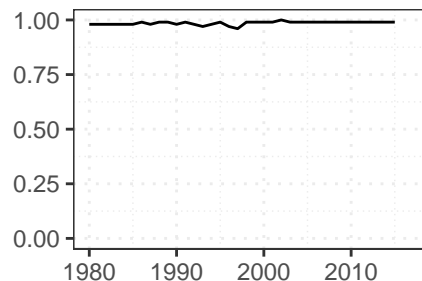

# Italy

## VSPI-B

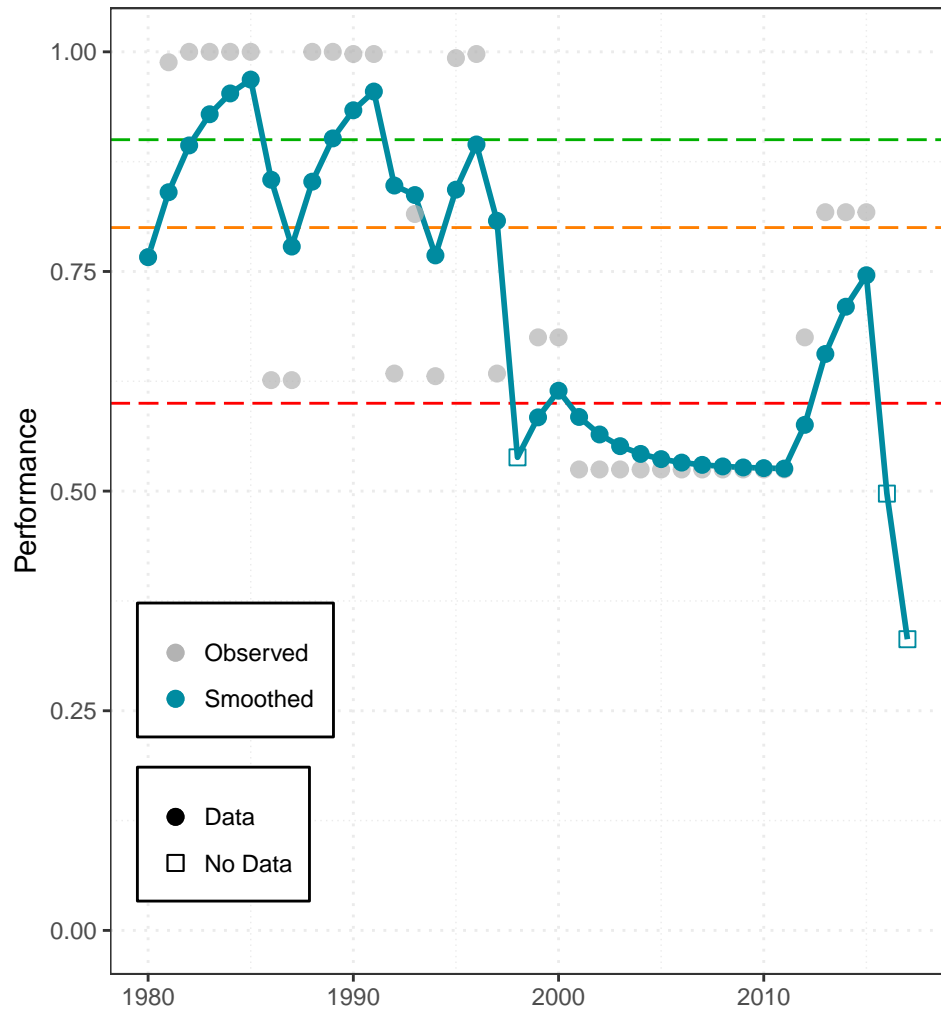

## Completeness

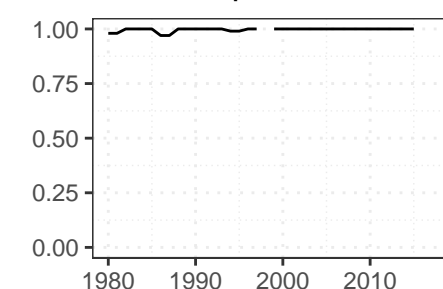

## Age Unspecified

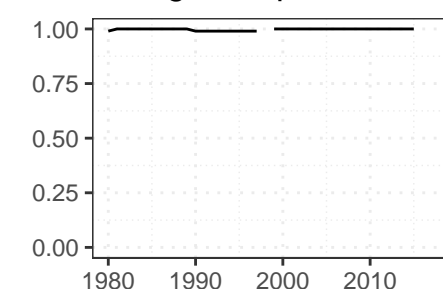

## Sex Unspecified

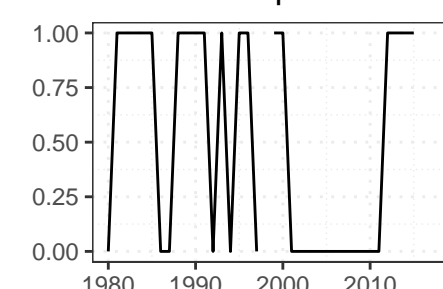

## Birth Order Unspecified

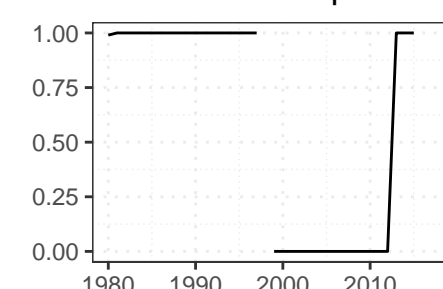

## Birth Weight Unspecified

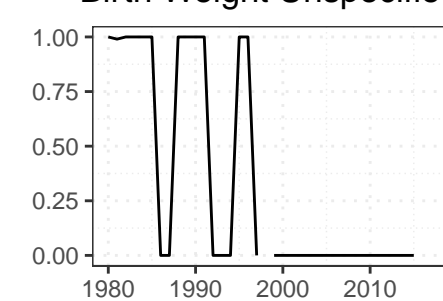



# Jamaica

VSPI-B

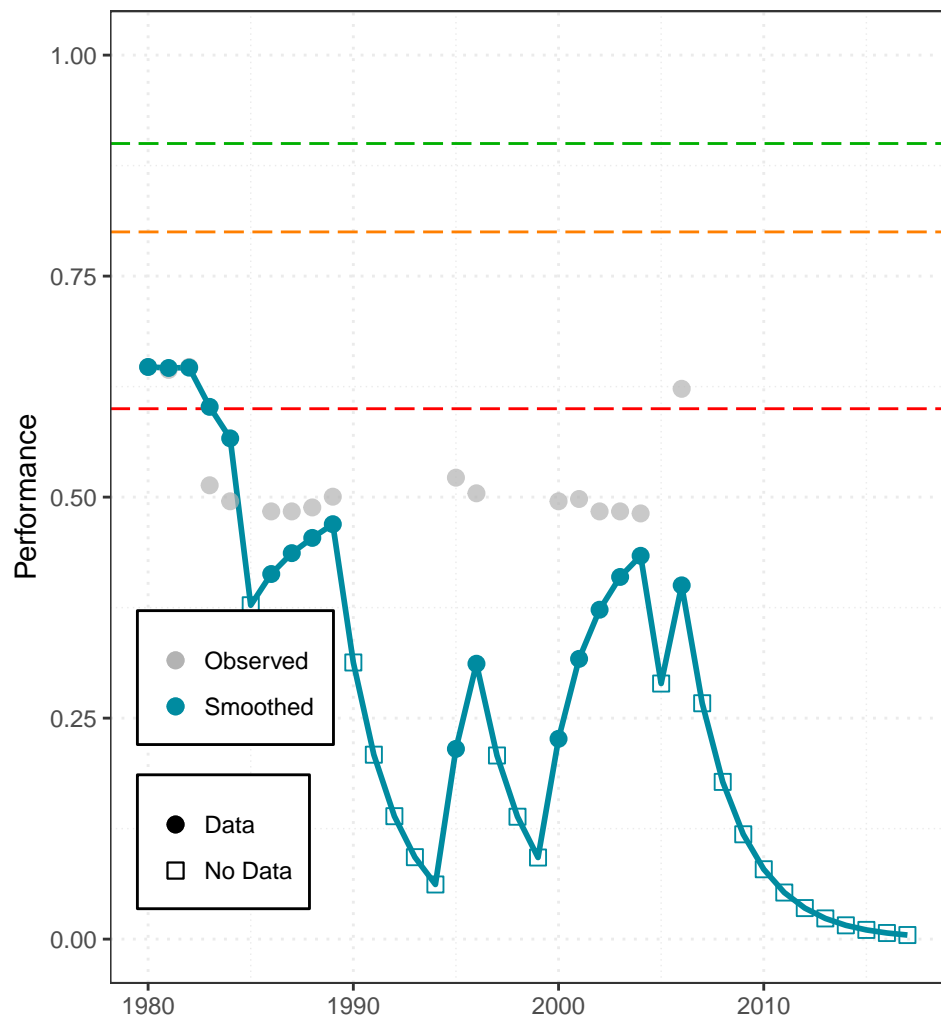

# Completeness

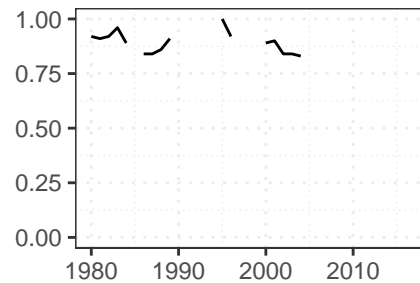

# Age Unspecified

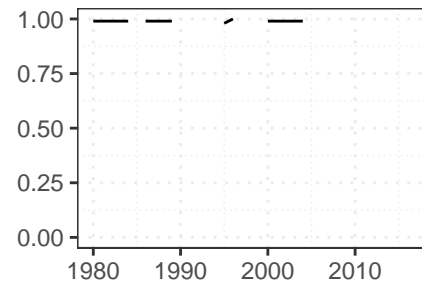

# Sex Unspecified

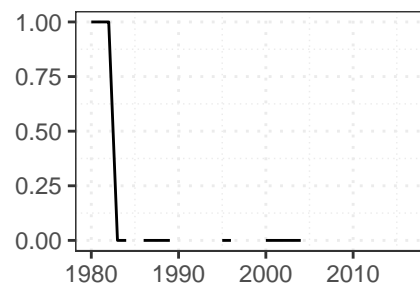

# Birth Order Unspecified

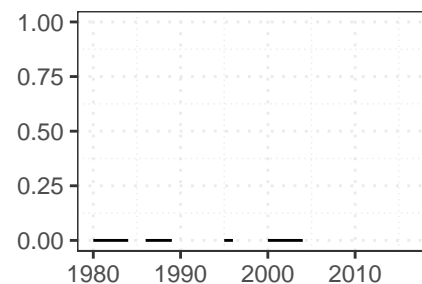

# Birth Weight Unspecified

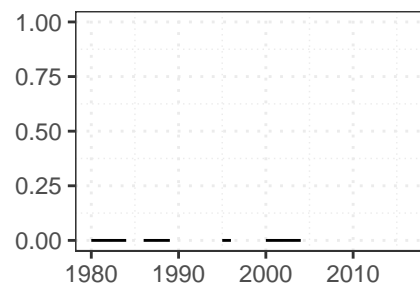

# Jordan VSPI-B

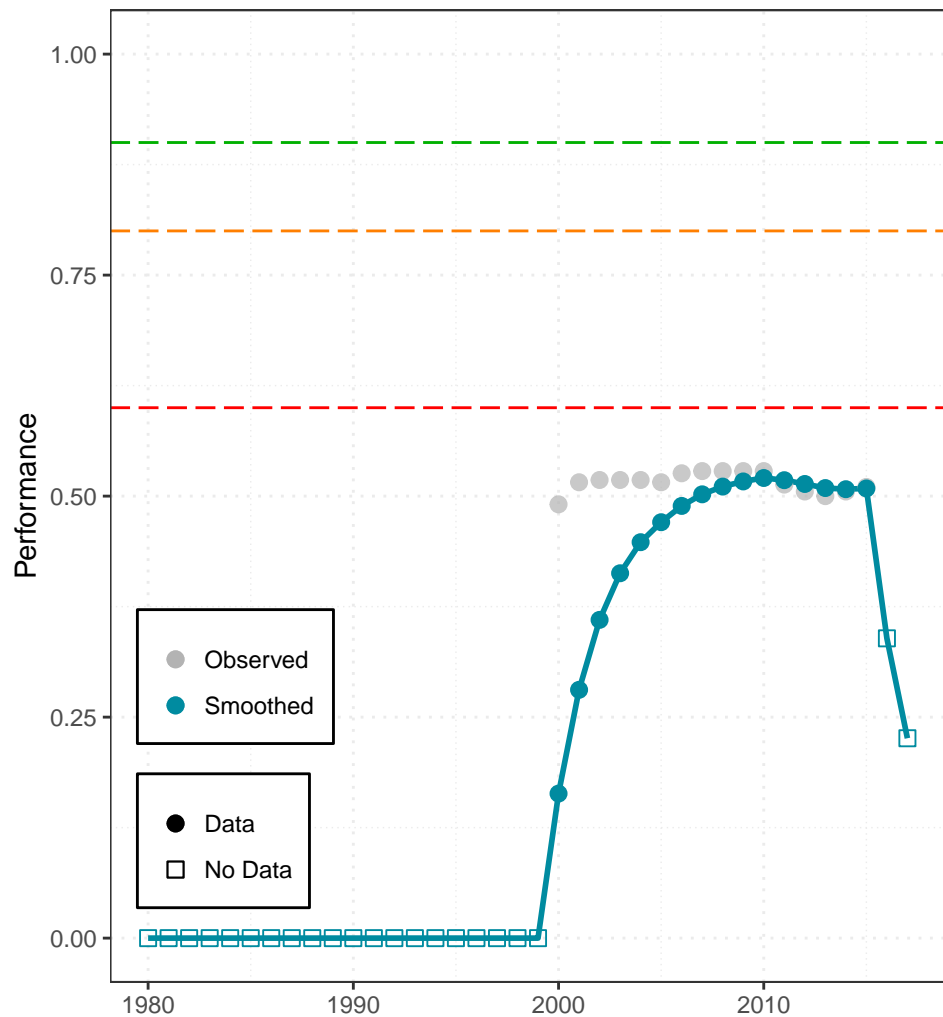

# Completeness

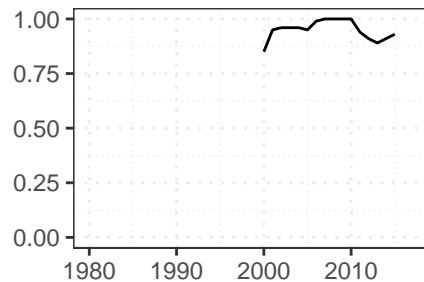

# Age Unspecified

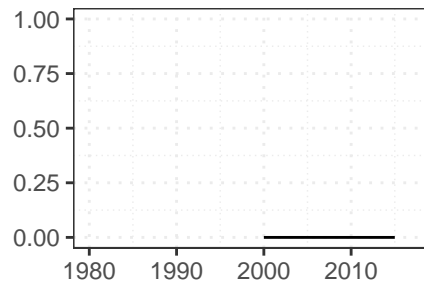

# Sex Unspecified

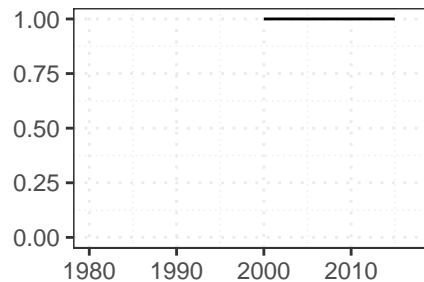

# Birth Order Unspecified



# Birth Weight Unspecified

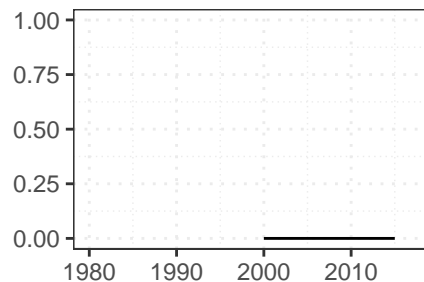

# Japan

## VSPI-B

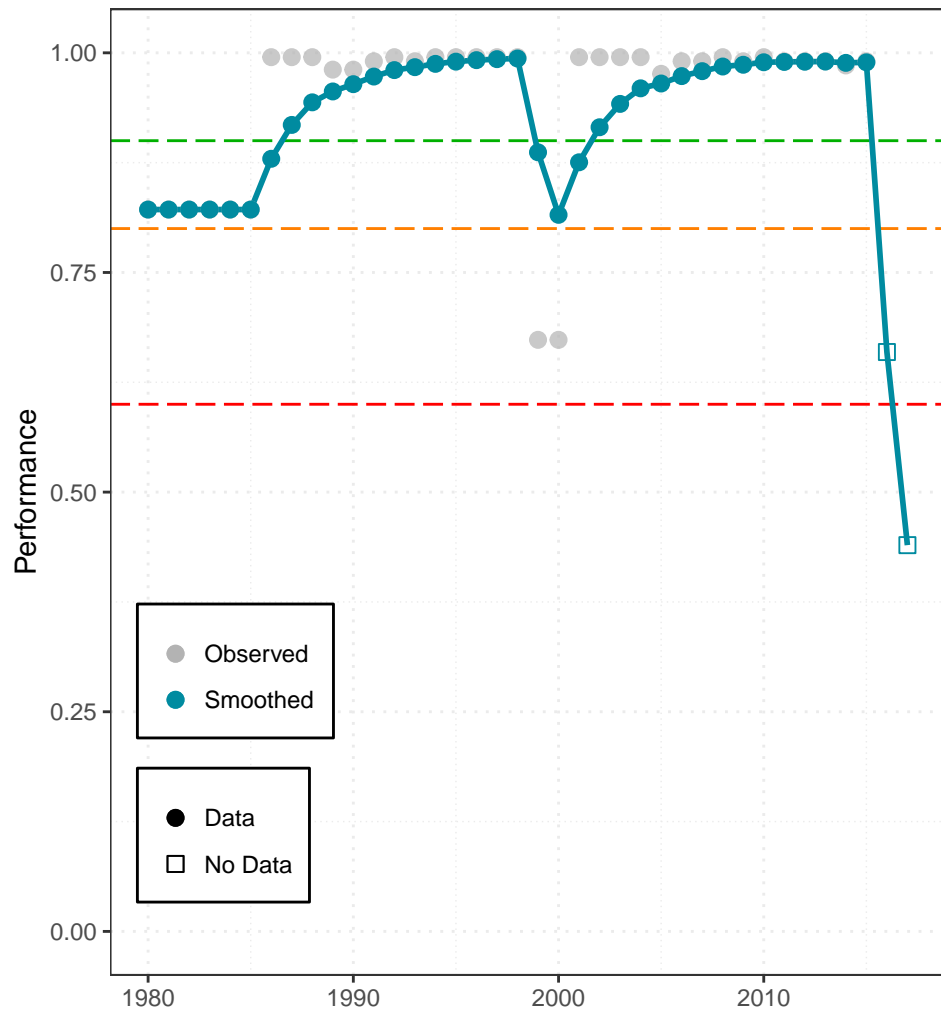

## Completeness

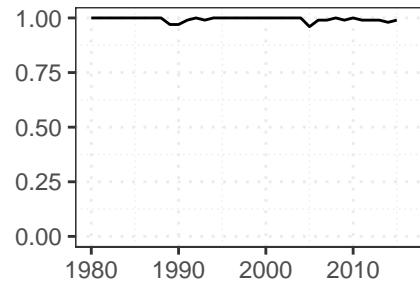

## Age Unspecified

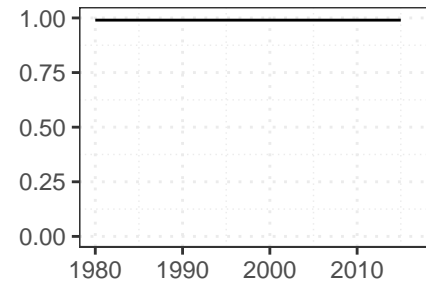

## Sex Unspecified

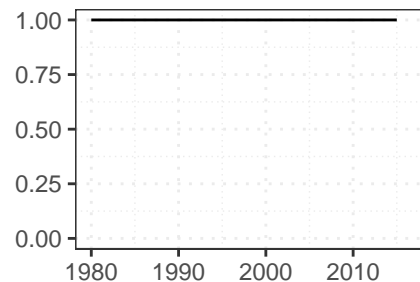

## Birth Order Unspecified

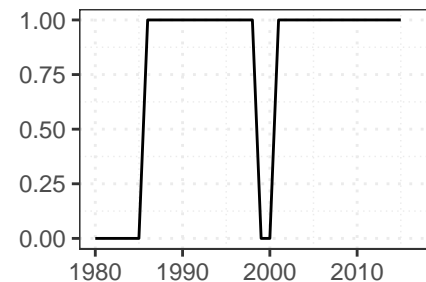

## Birth Weight Unspecified

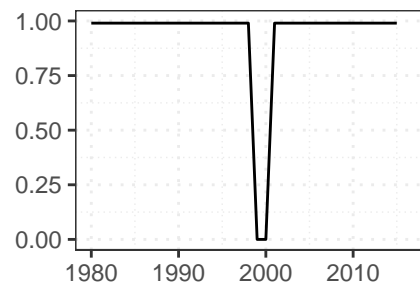

# Kazakhstan

VSPI-B

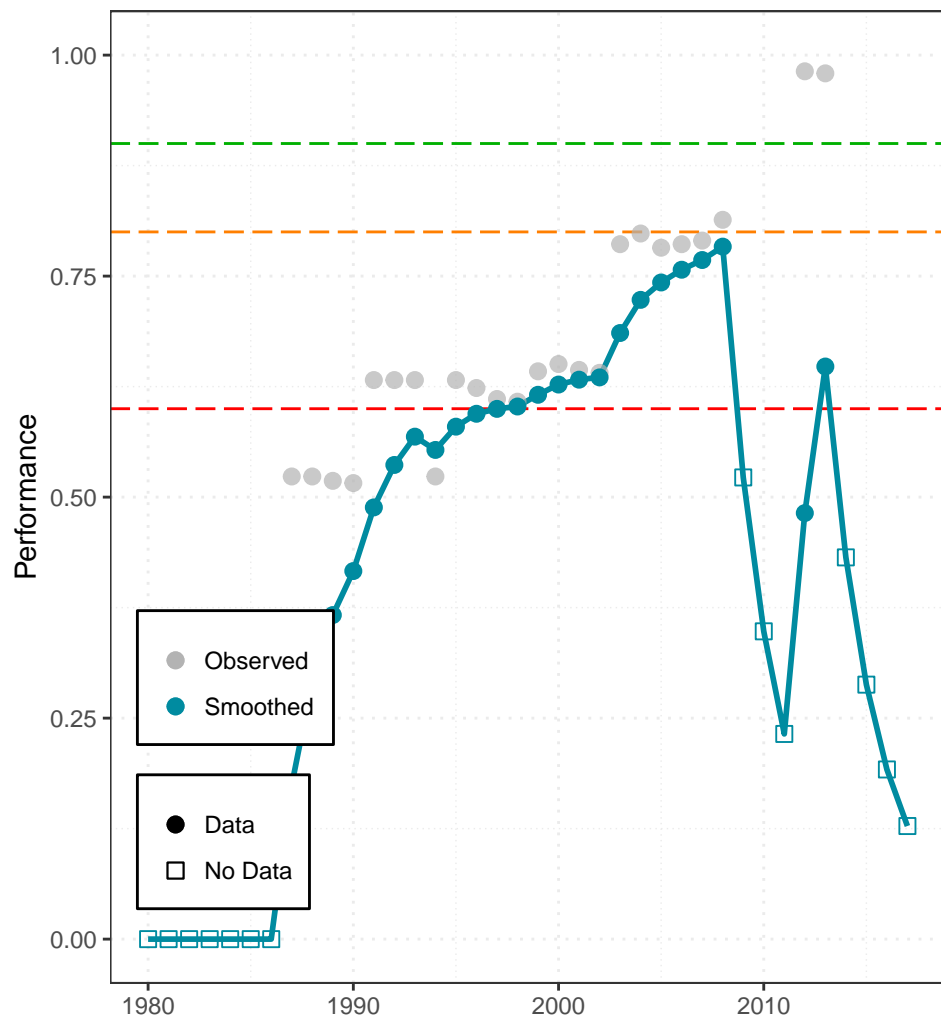

## Completeness

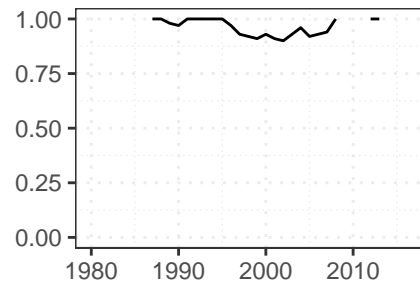

## Age Unspecified

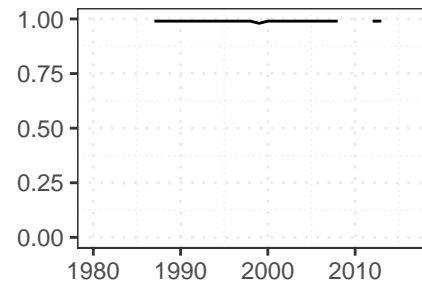

## Sex Unspecified

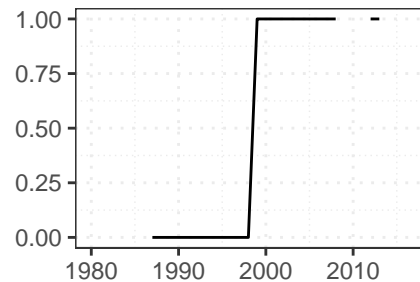

## Birth Order Unspecified

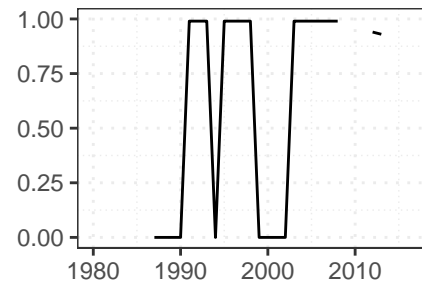

## Birth Weight Unspecified

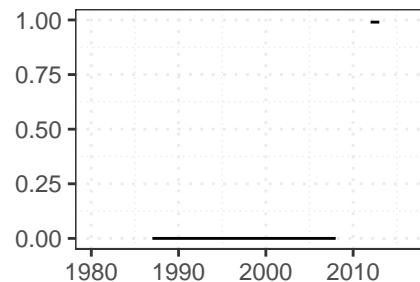

# Kyrgyzstan

VSPI-B

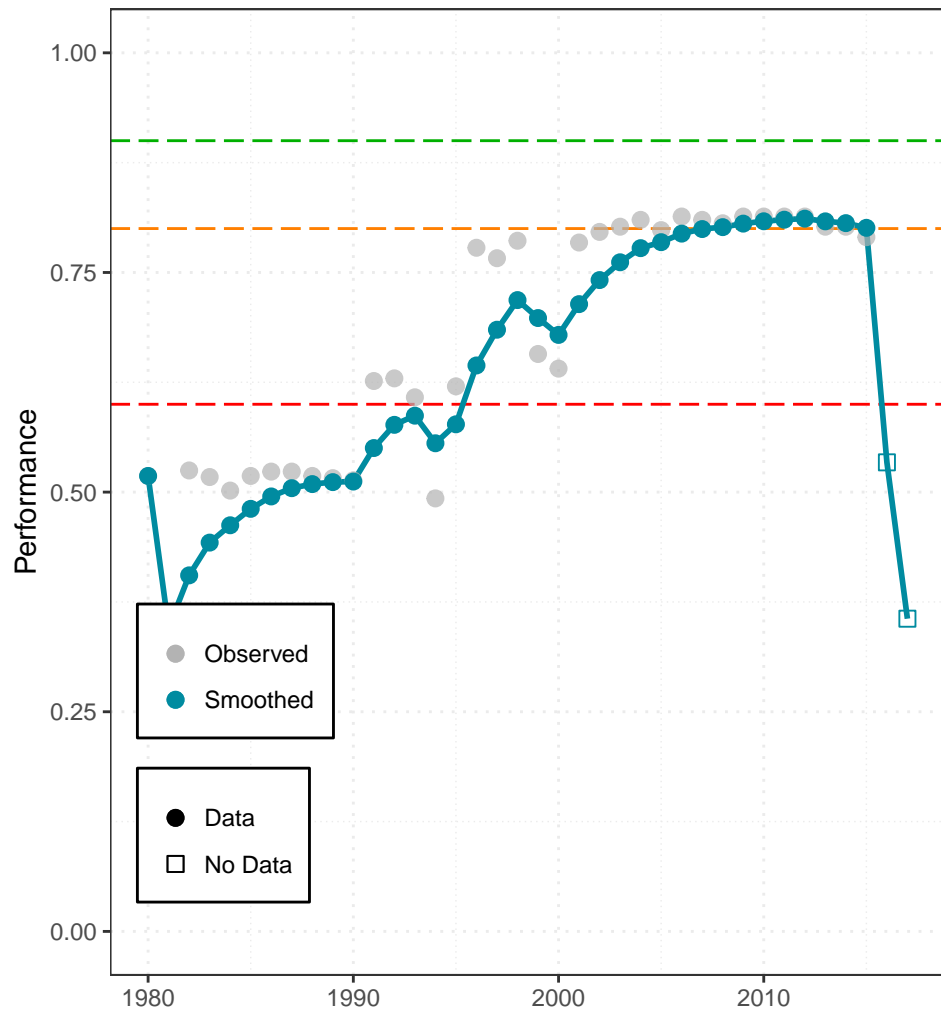

## Completeness

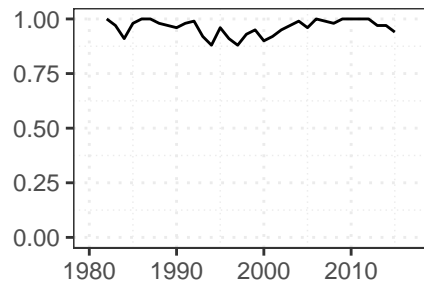

## Age Unspecified

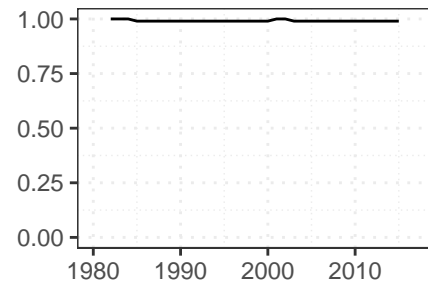

## Sex Unspecified

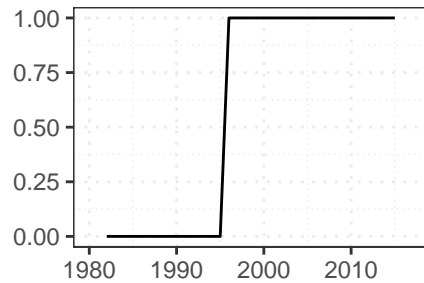

## Birth Order Unspecified

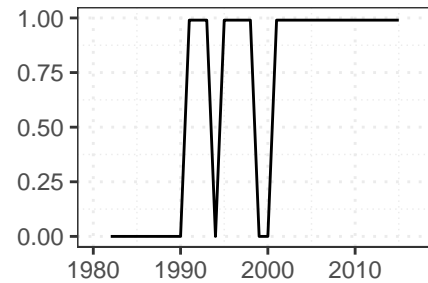

## Birth Weight Unspecified

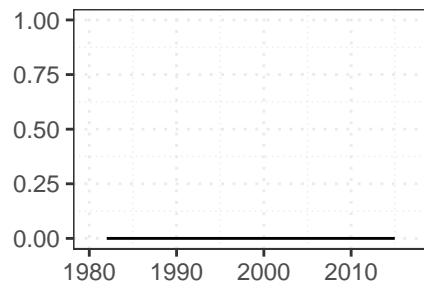

# South Korea

VSPI-B

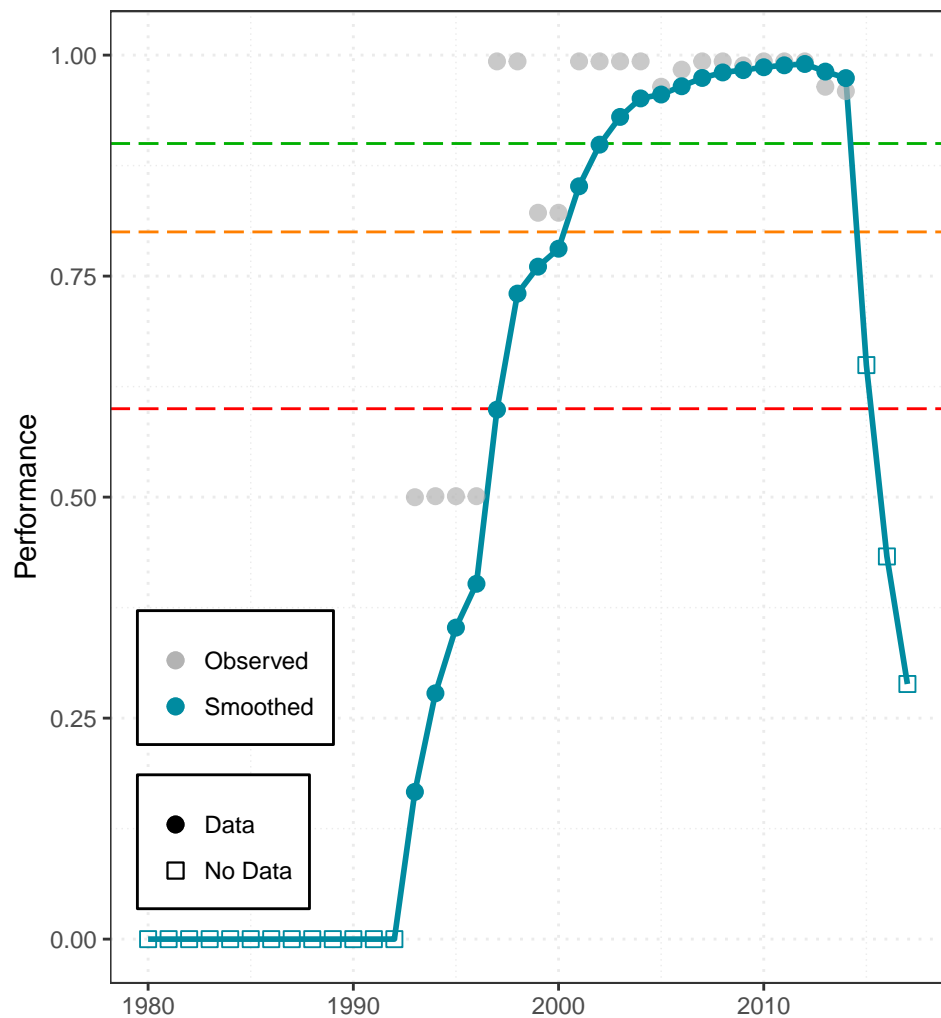

## Completeness

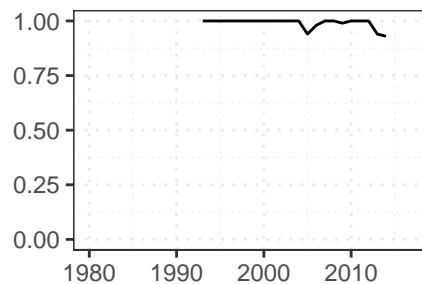

## Age Unspecified

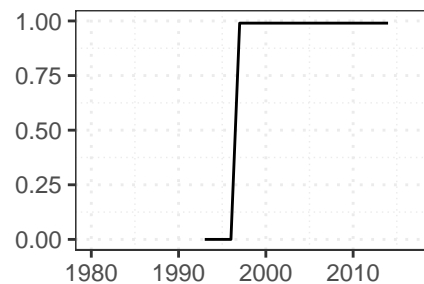

## Sex Unspecified

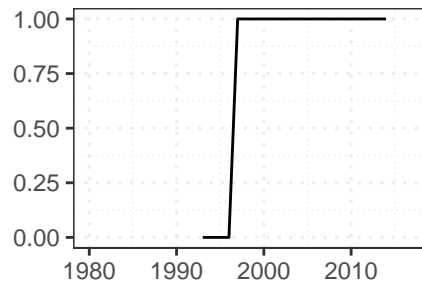

## Birth Order Unspecified

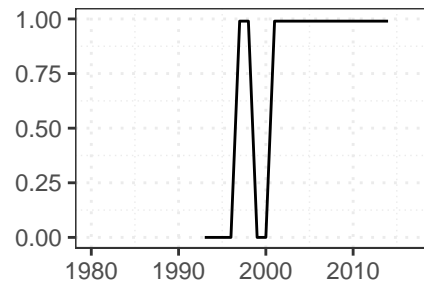

## Birth Weight Unspecified

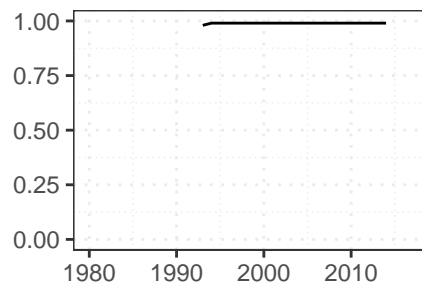

# Kuwait VSPI-B

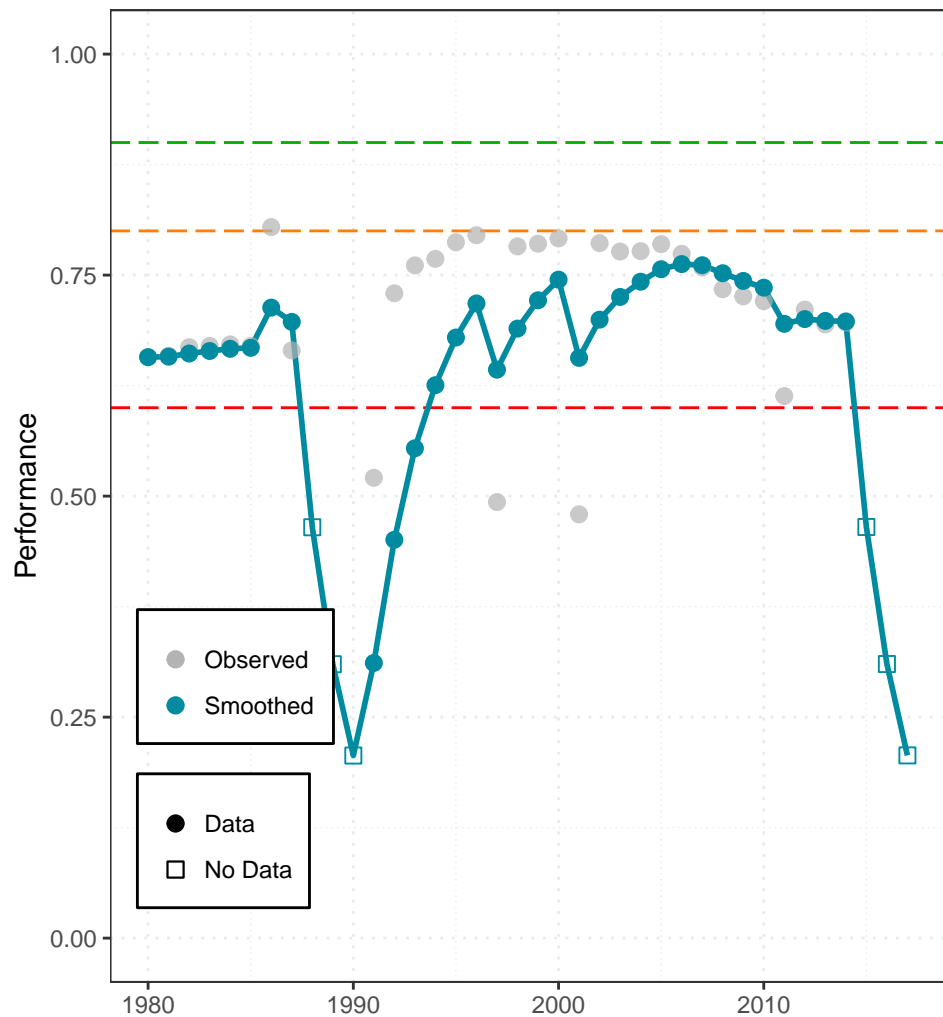

## Completeness

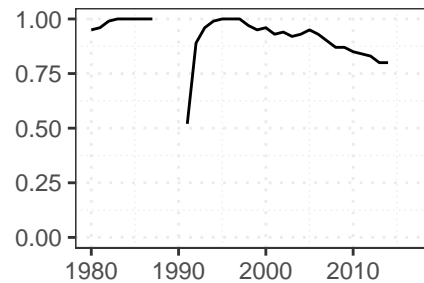

## Age Unspecified

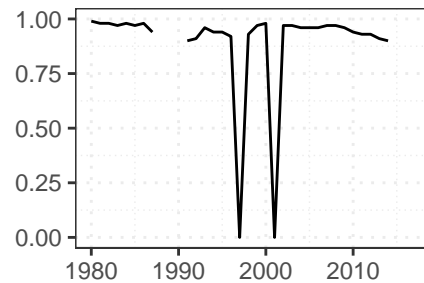

## Sex Unspecified

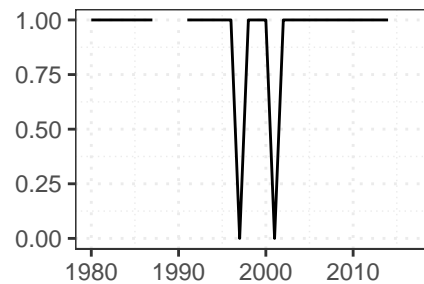

## Birth Order Unspecified

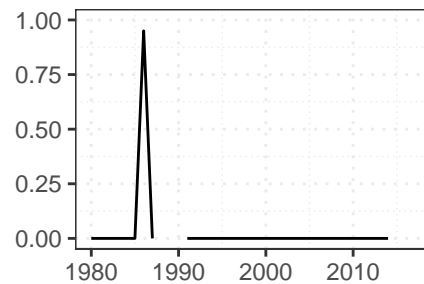

## Birth Weight Unspecified

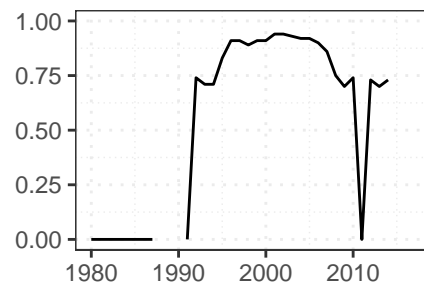

# Libya

VSPI-B

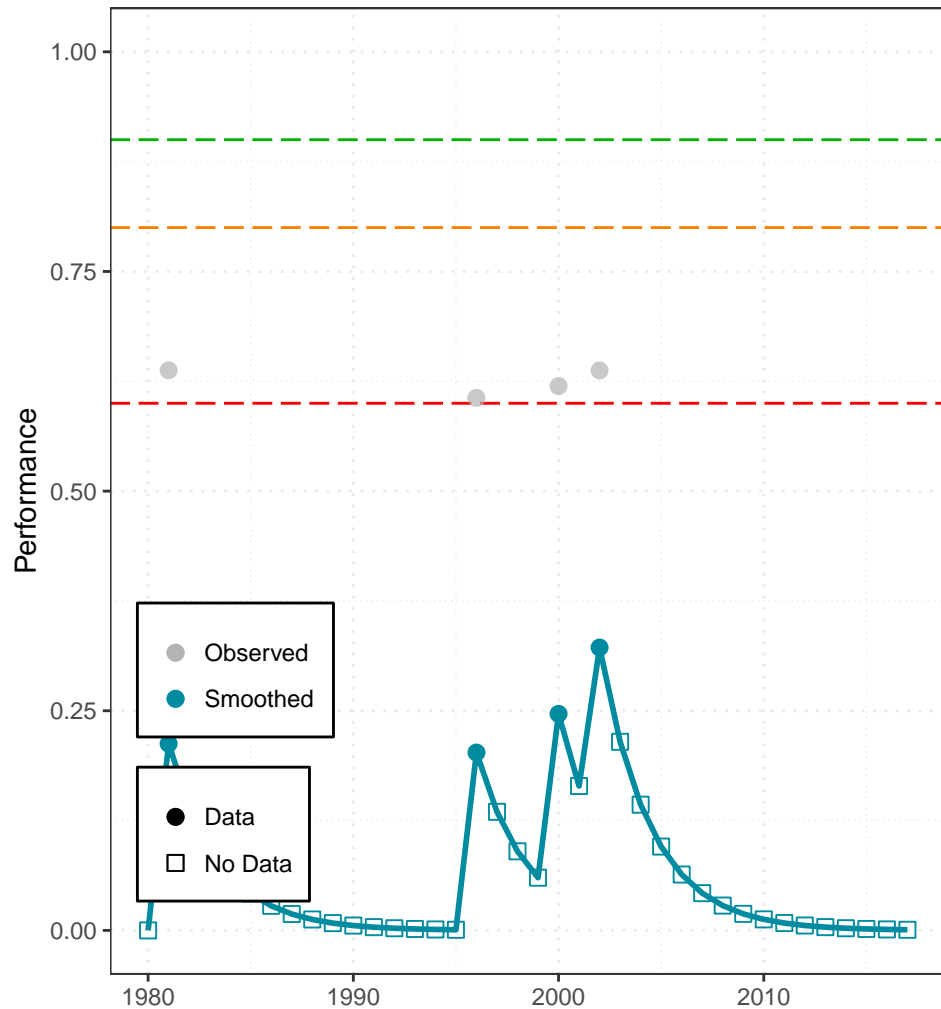

## Completeness

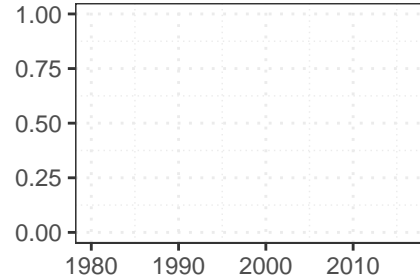

## Age Unspecified

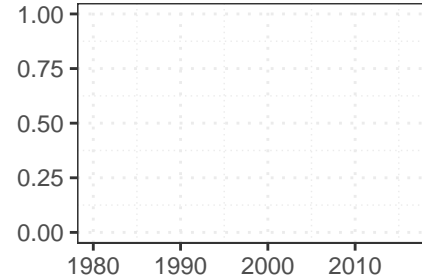

## Sex Unspecified

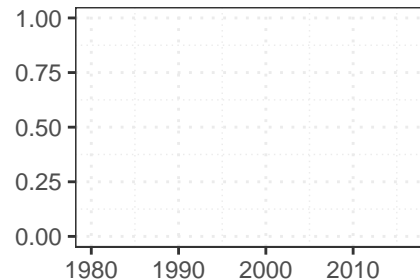

## Birth Order Unspecified

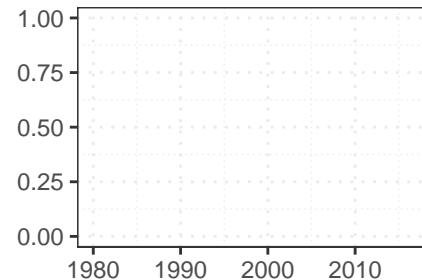

## Birth Weight Unspecified

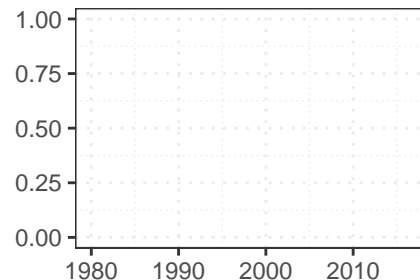



# Sri Lanka

VSPI-B

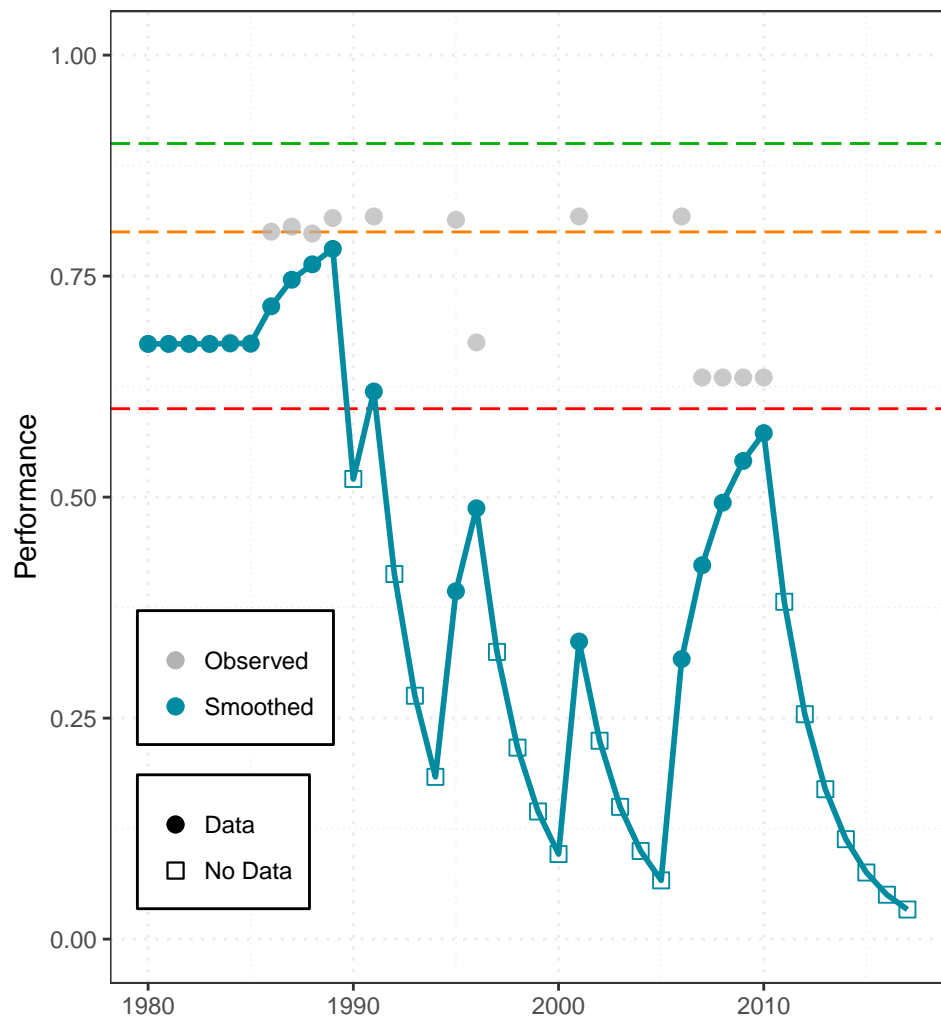

## Completeness

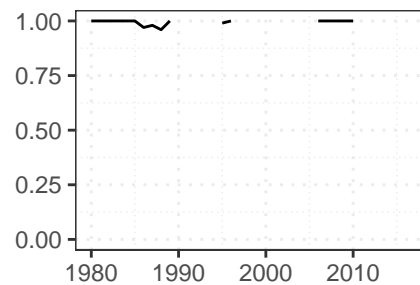

## Age Unspecified

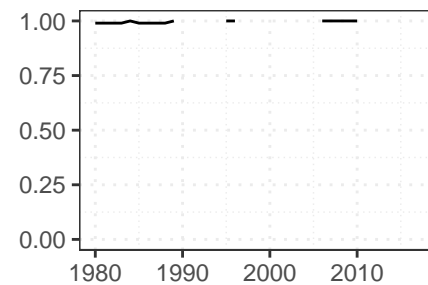

## Sex Unspecified

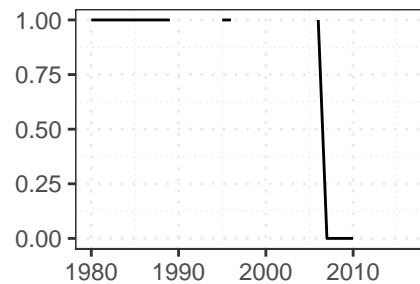

## Birth Order Unspecified

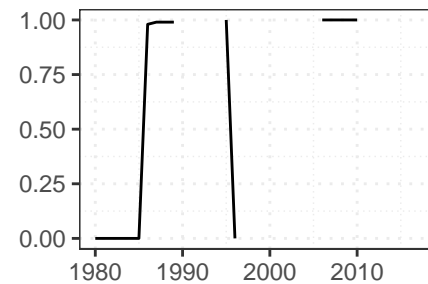

## Birth Weight Unspecified

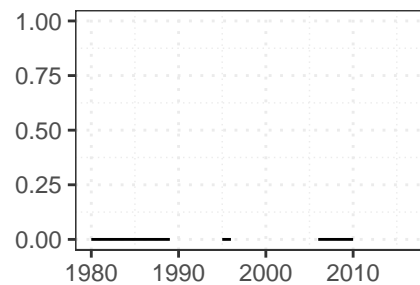

# Lithuania

VSPI-B

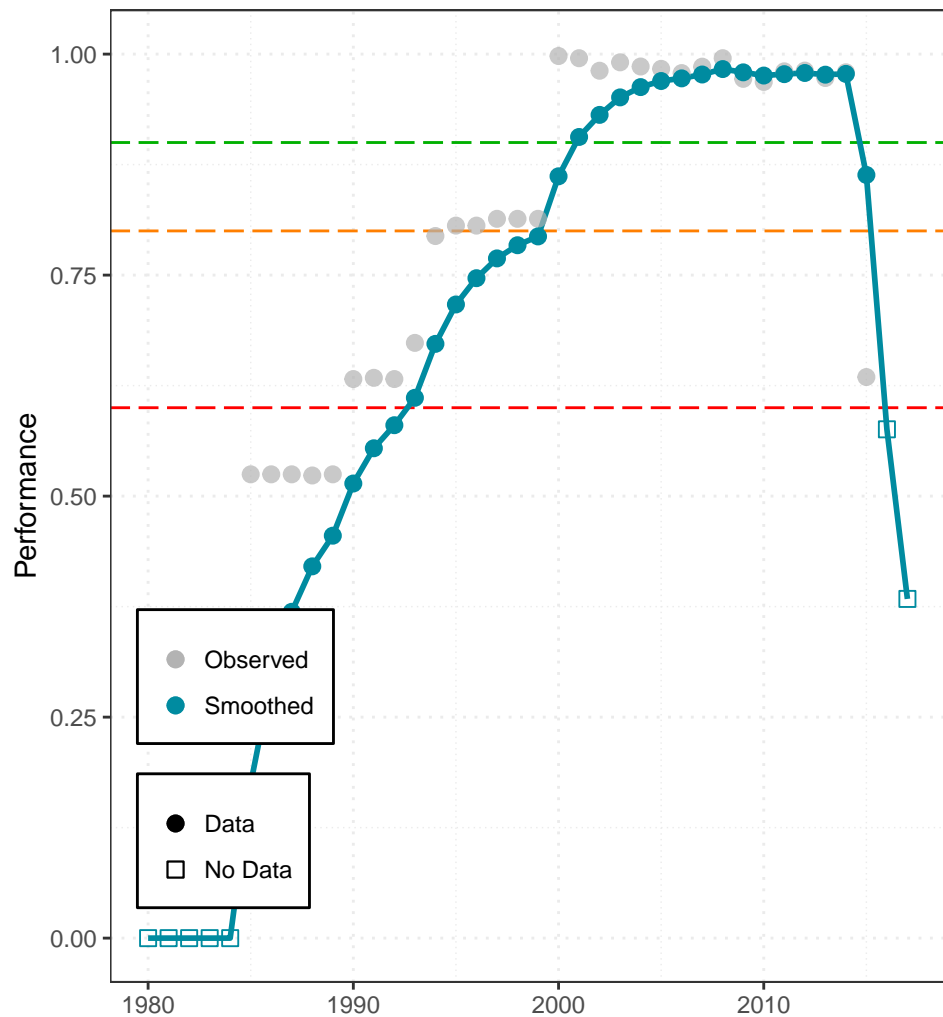

## Completeness

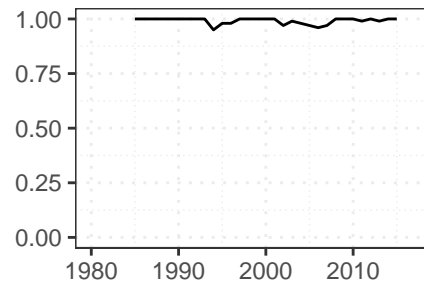

## Age Unspecified

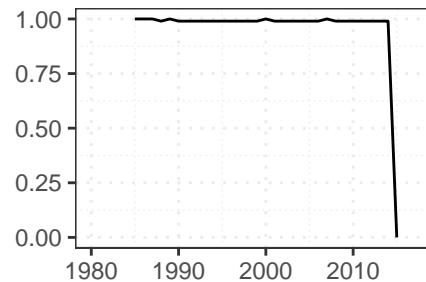

## Sex Unspecified

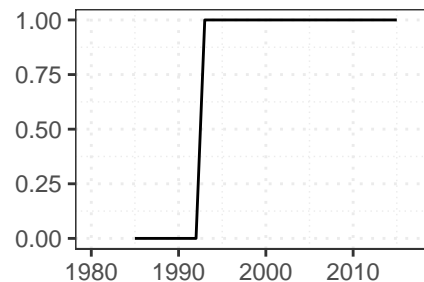

## Birth Order Unspecified

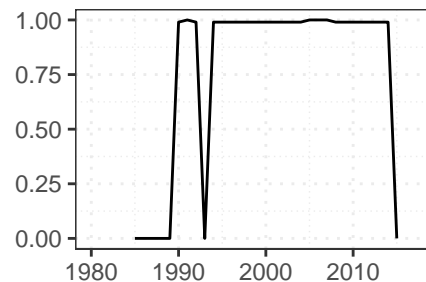

## Birth Weight Unspecified

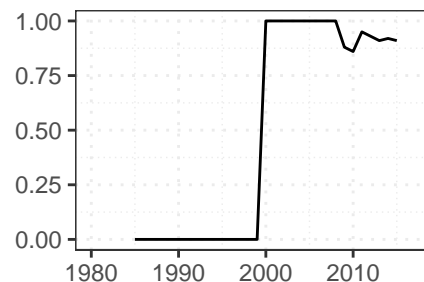

# Luxembourg

VSPI-B

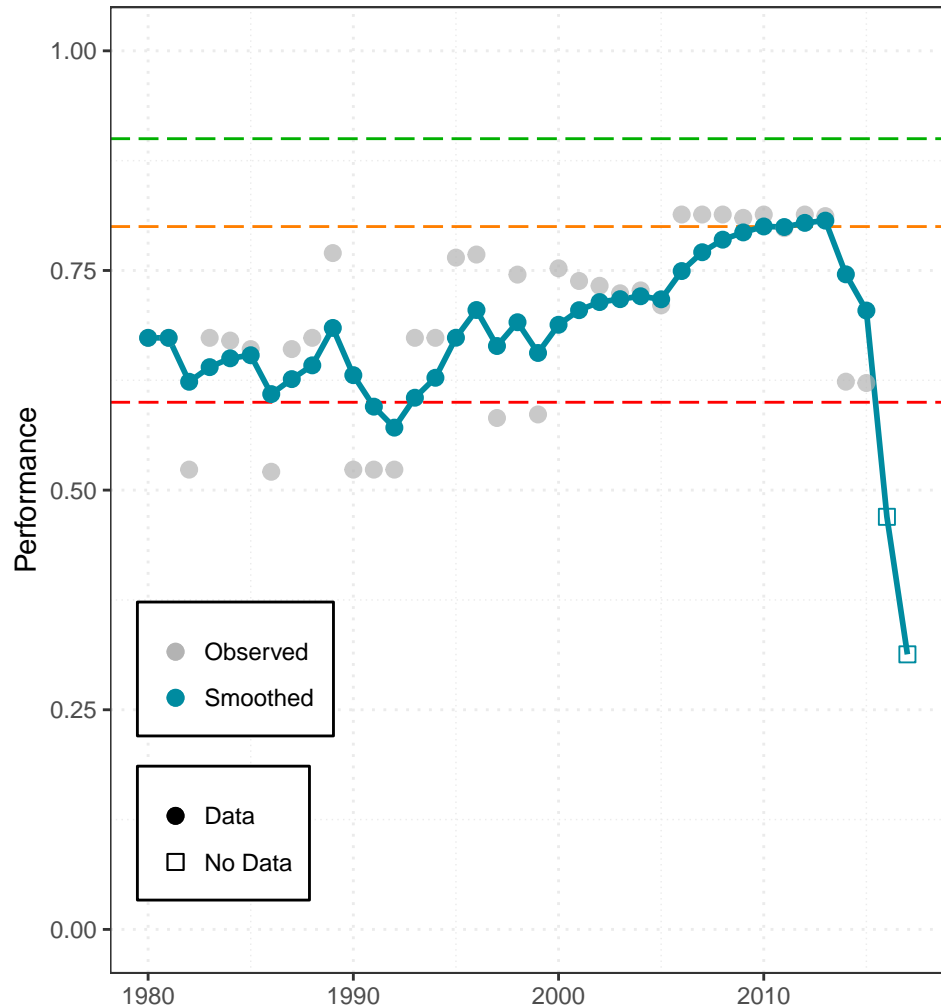

## Completeness

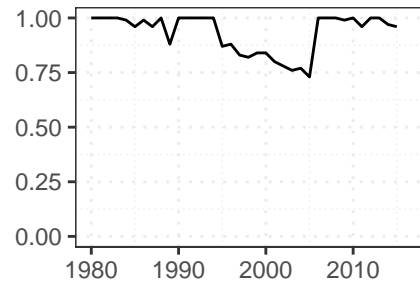

## Age Unspecified

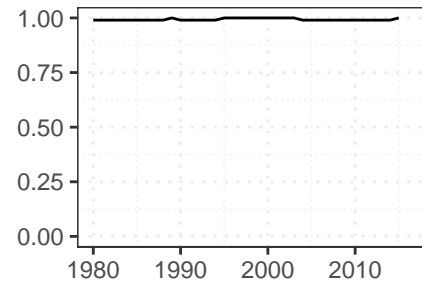

## Sex Unspecified

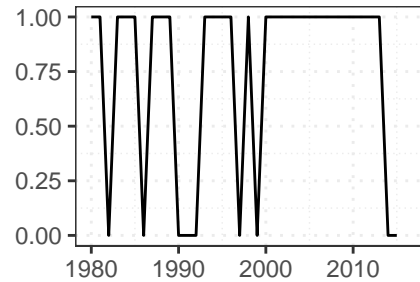

## Birth Order Unspecified

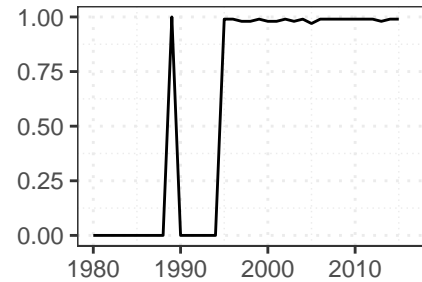

## Birth Weight Unspecified

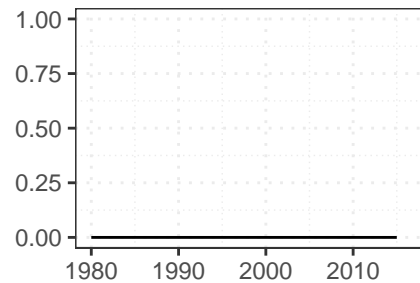

# Latvia VSPI-B

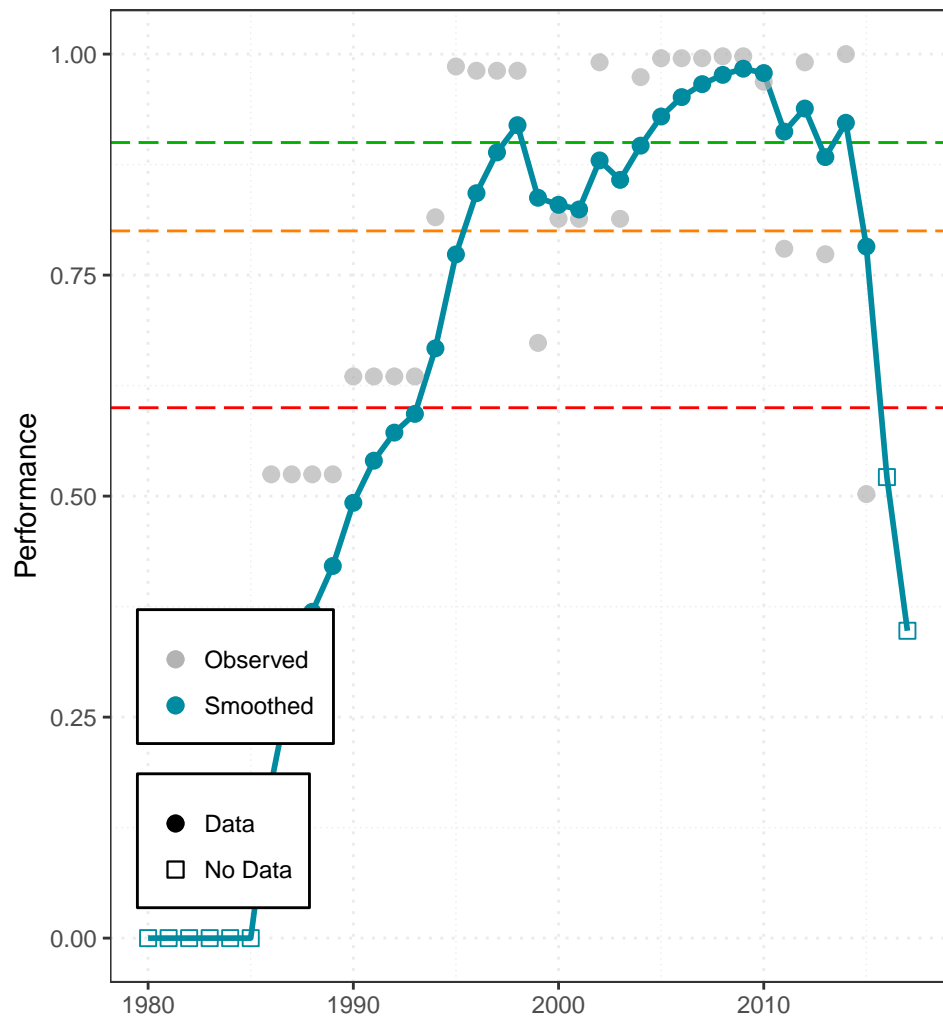

## Completeness

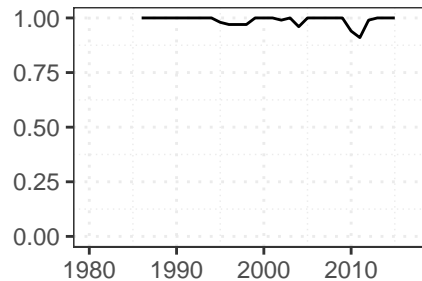

## Age Unspecified

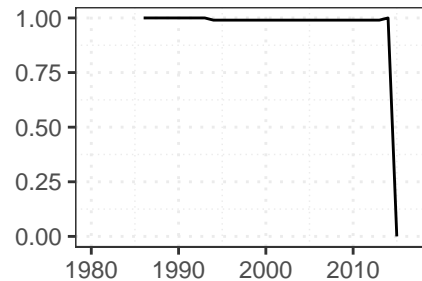

## Sex Unspecified

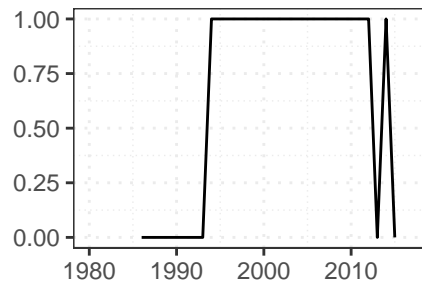

## Birth Order Unspecified

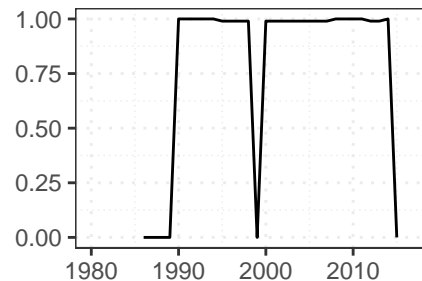

## Birth Weight Unspecified

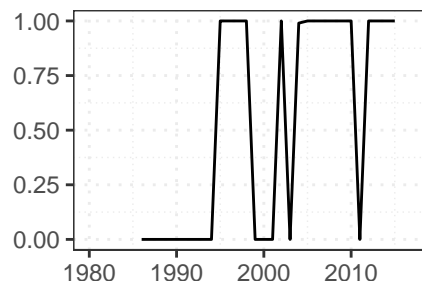

# Macao

## VSPI-B

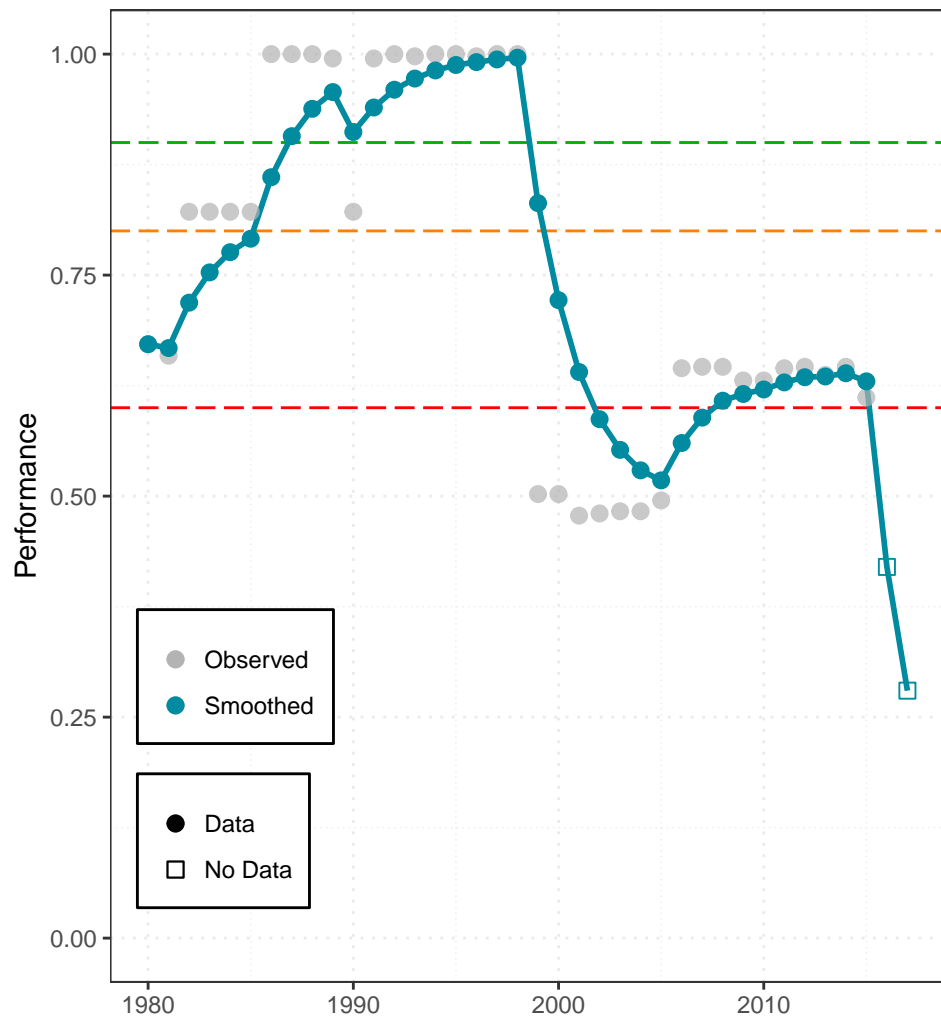

## Completeness

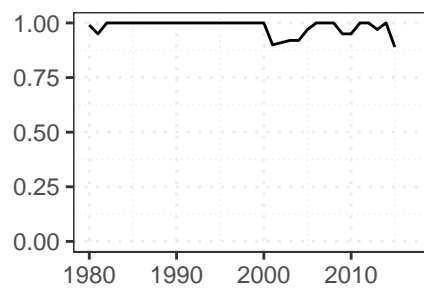

## Age Unspecified

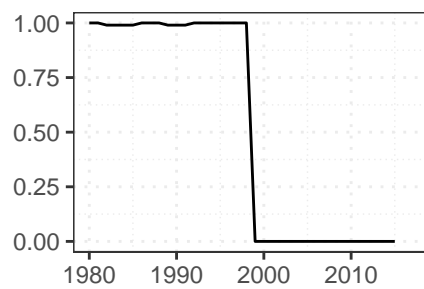

## Sex Unspecified

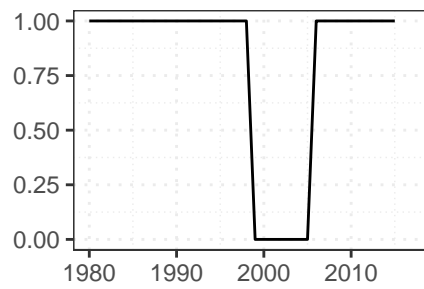

## Birth Order Unspecified

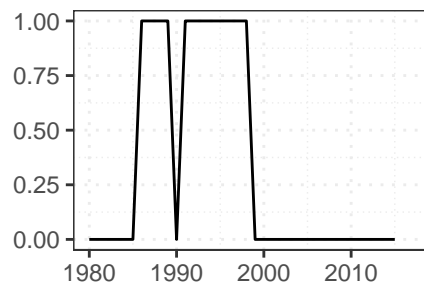

## Birth Weight Unspecified

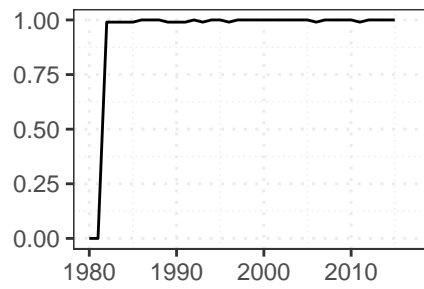

# Morocco

VSPI-B

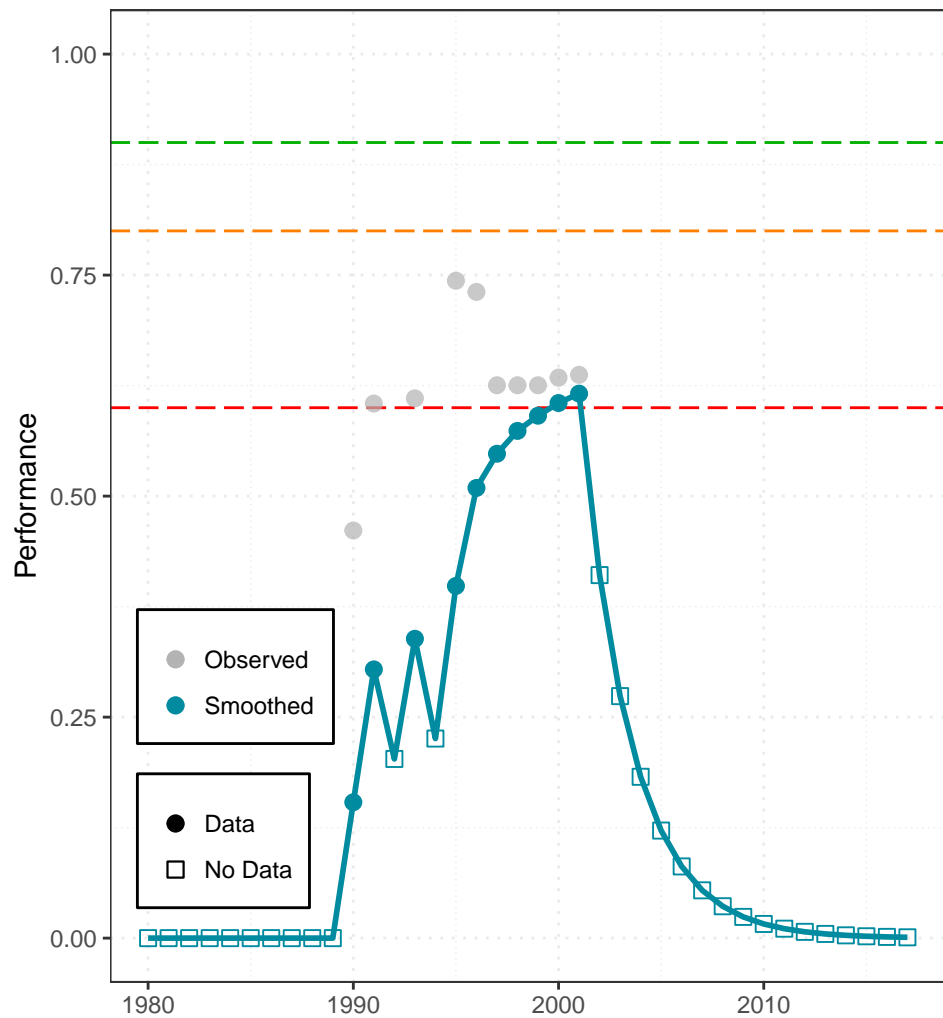

# Completeness

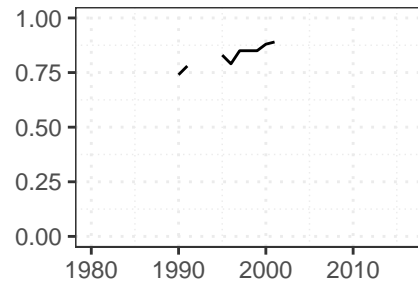

# Age Unspecified

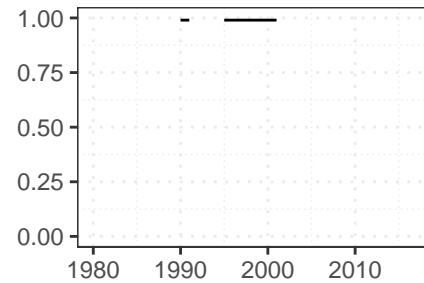

# Sex Unspecified

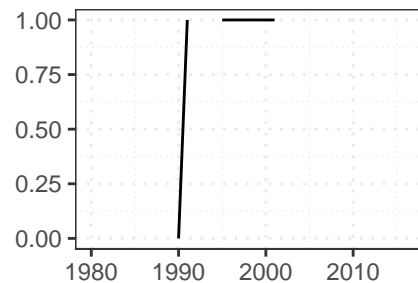

# Birth Order Unspecified

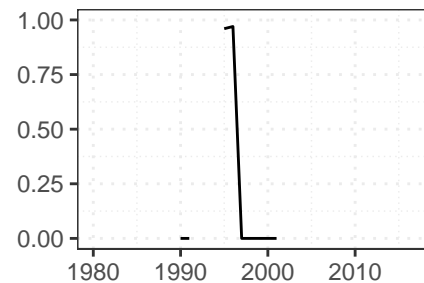

# Birth Weight Unspecified

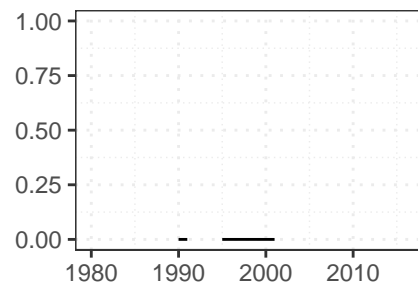

# Moldova

## VSPI-B

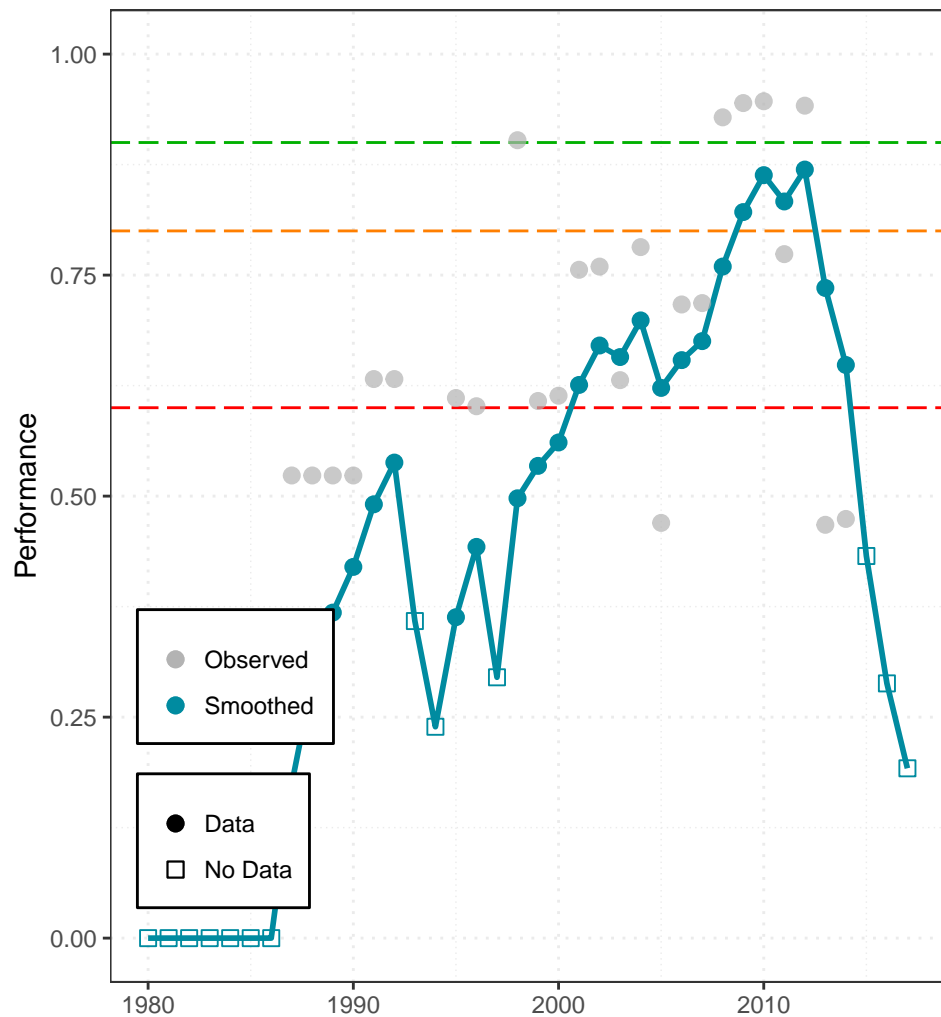

## Completeness

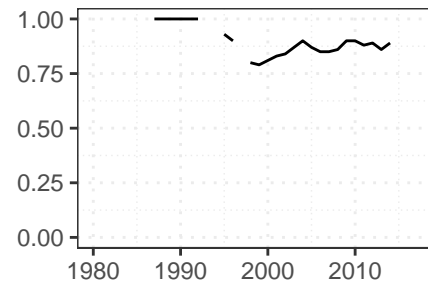

## Age Unspecified

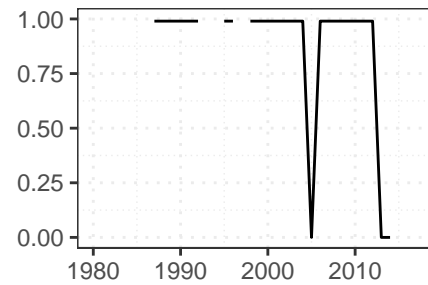

## Sex Unspecified

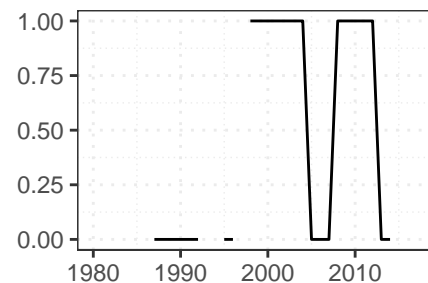

## Birth Order Unspecified

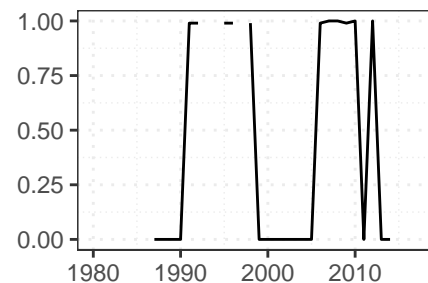

## Birth Weight Unspecified

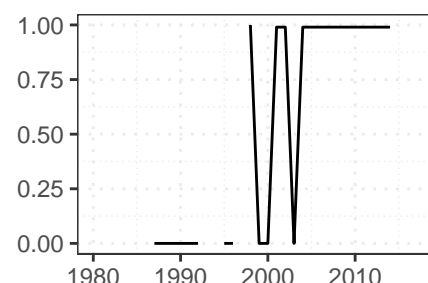

# Maldives

VSPI-B

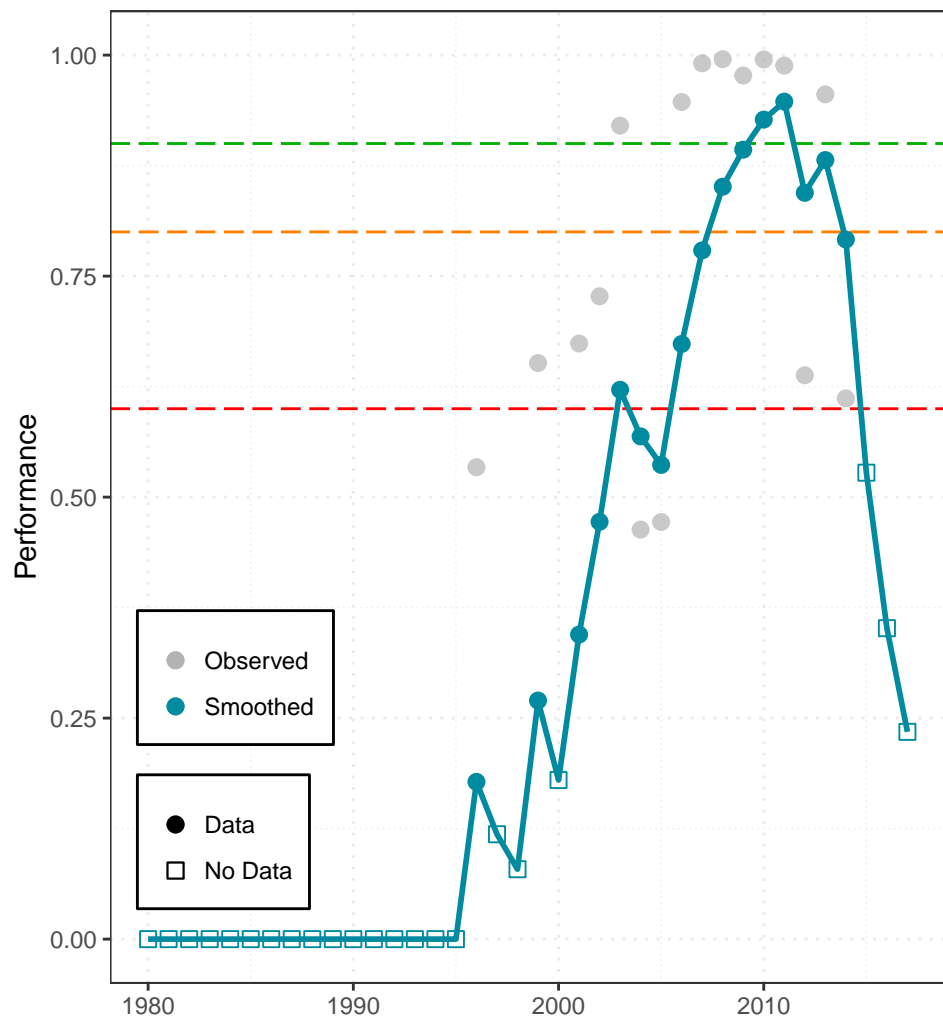

## Completeness

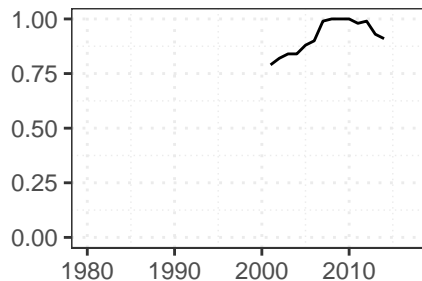

## Age Unspecified

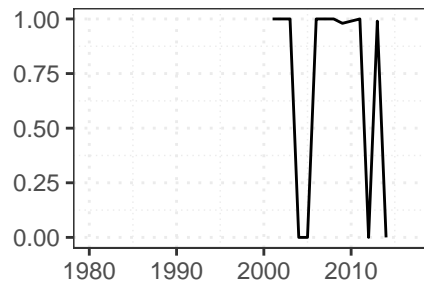

## Sex Unspecified

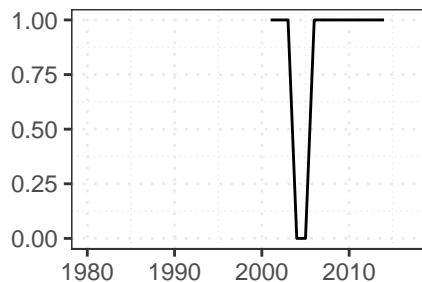

## Birth Order Unspecified

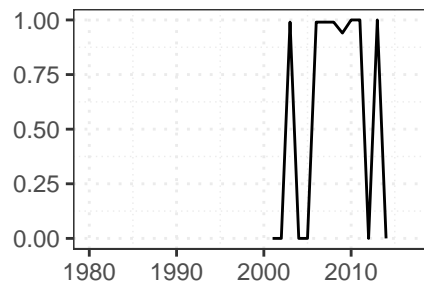

## Birth Weight Unspecified

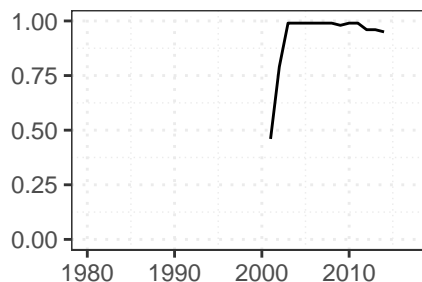



# Mexico VSPI-B

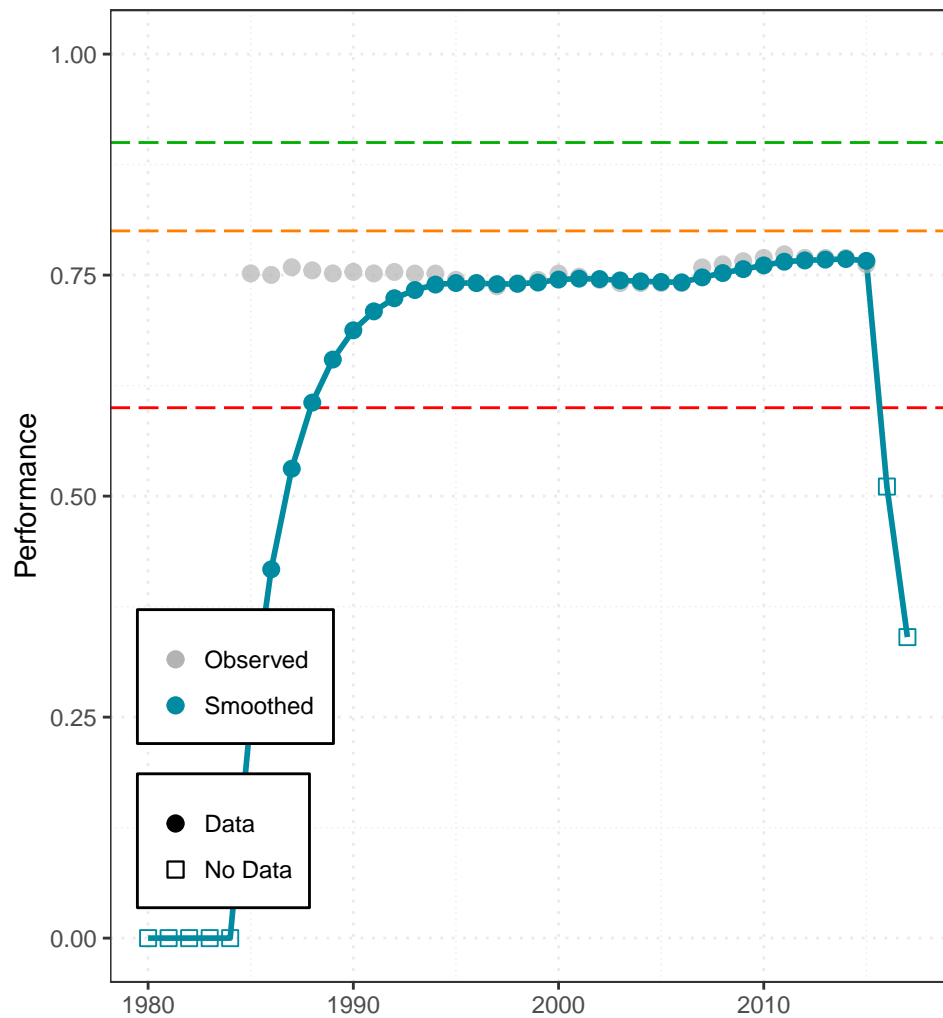

## Completeness

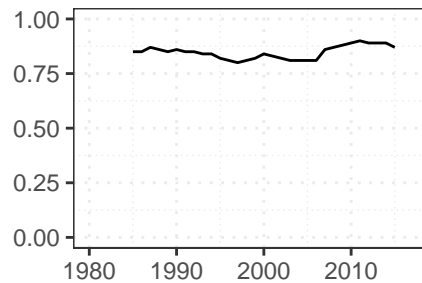

## Age Unspecified

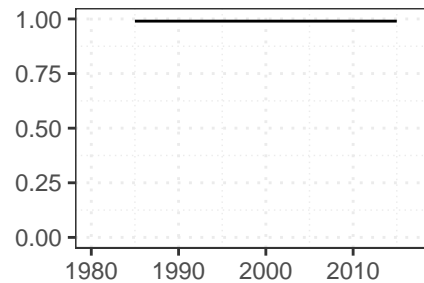

## Sex Unspecified

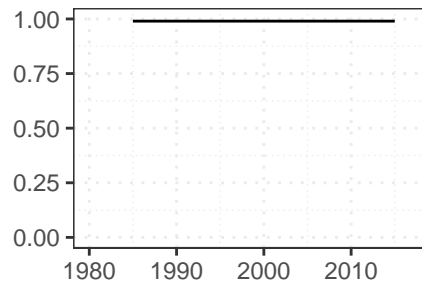

## Birth Order Unspecified

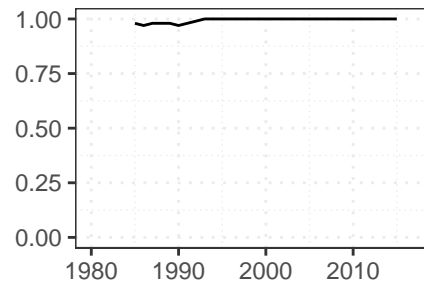

## Birth Weight Unspecified

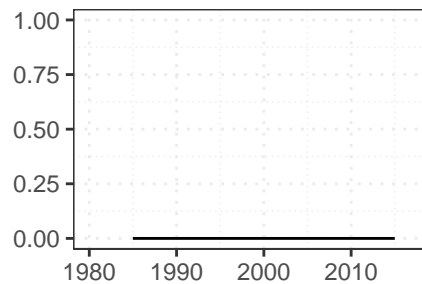

# Macedonia

VSPI-B

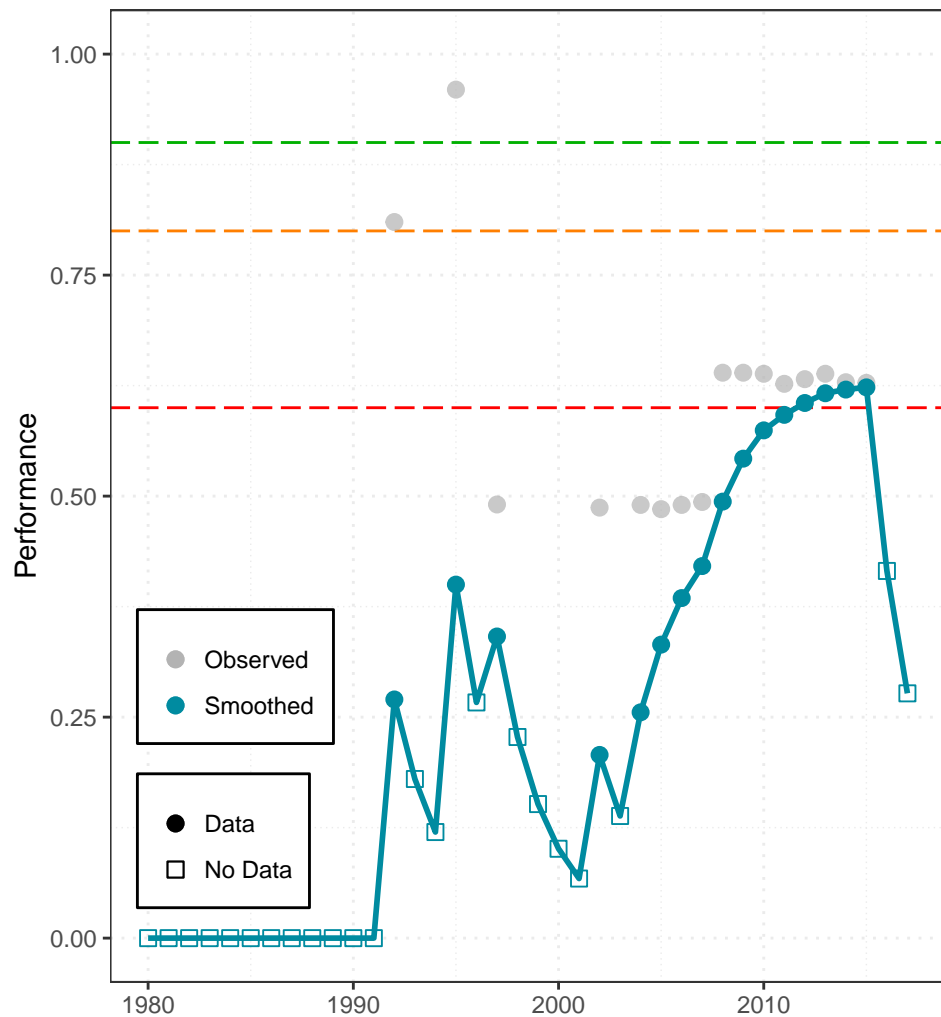

# Completeness

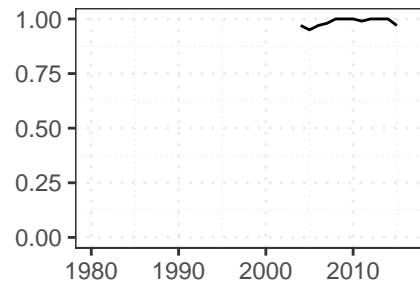

# Age Unspecified

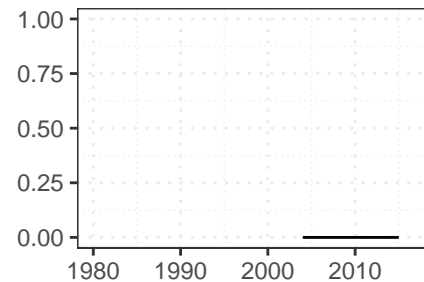

# Sex Unspecified

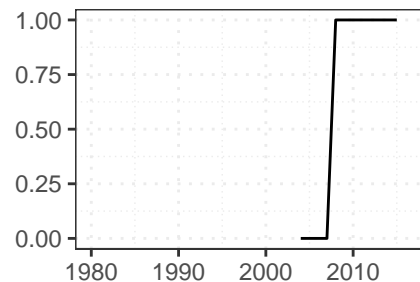

# Birth Order Unspecified

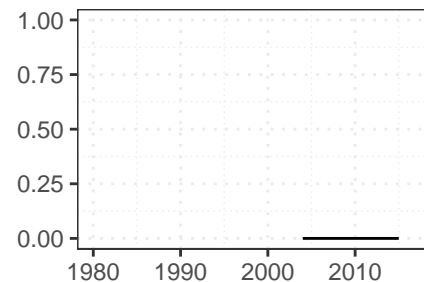

# Birth Weight Unspecified

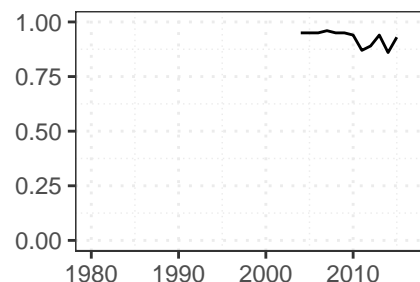

# Mali

## VSPI-B

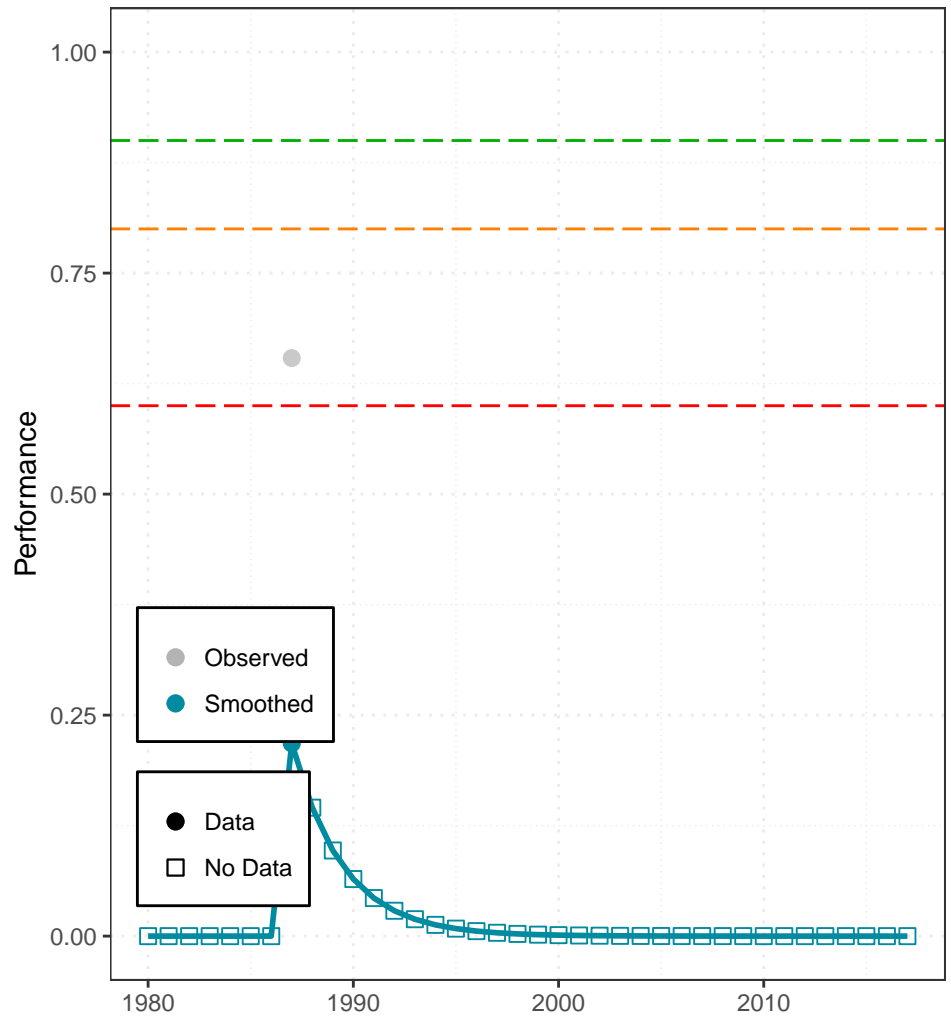

## Completeness

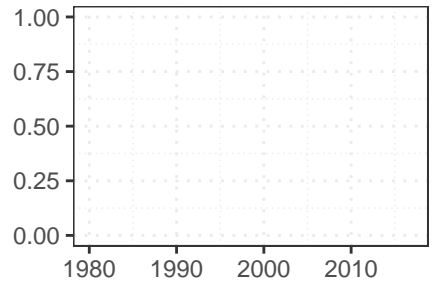

## Age Unspecified

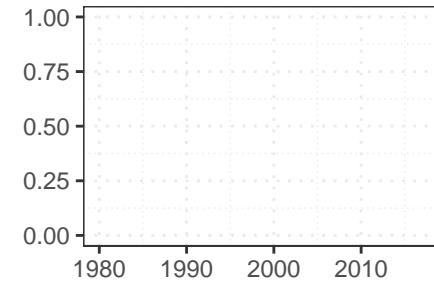

## Sex Unspecified

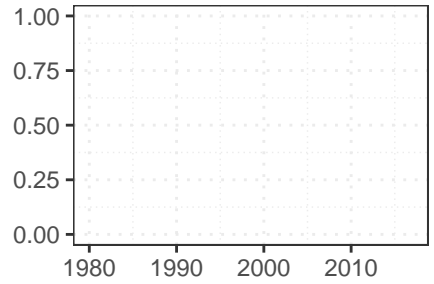

## Birth Order Unspecified

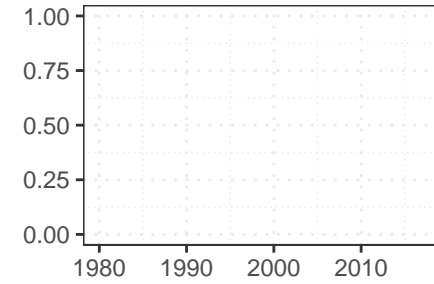

## Birth Weight Unspecified

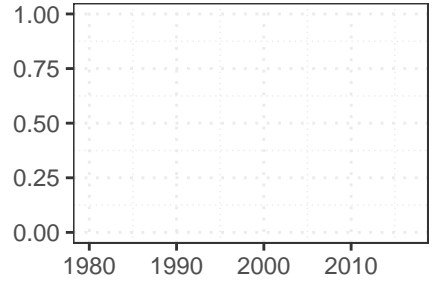

# Malta

## VSPI-B

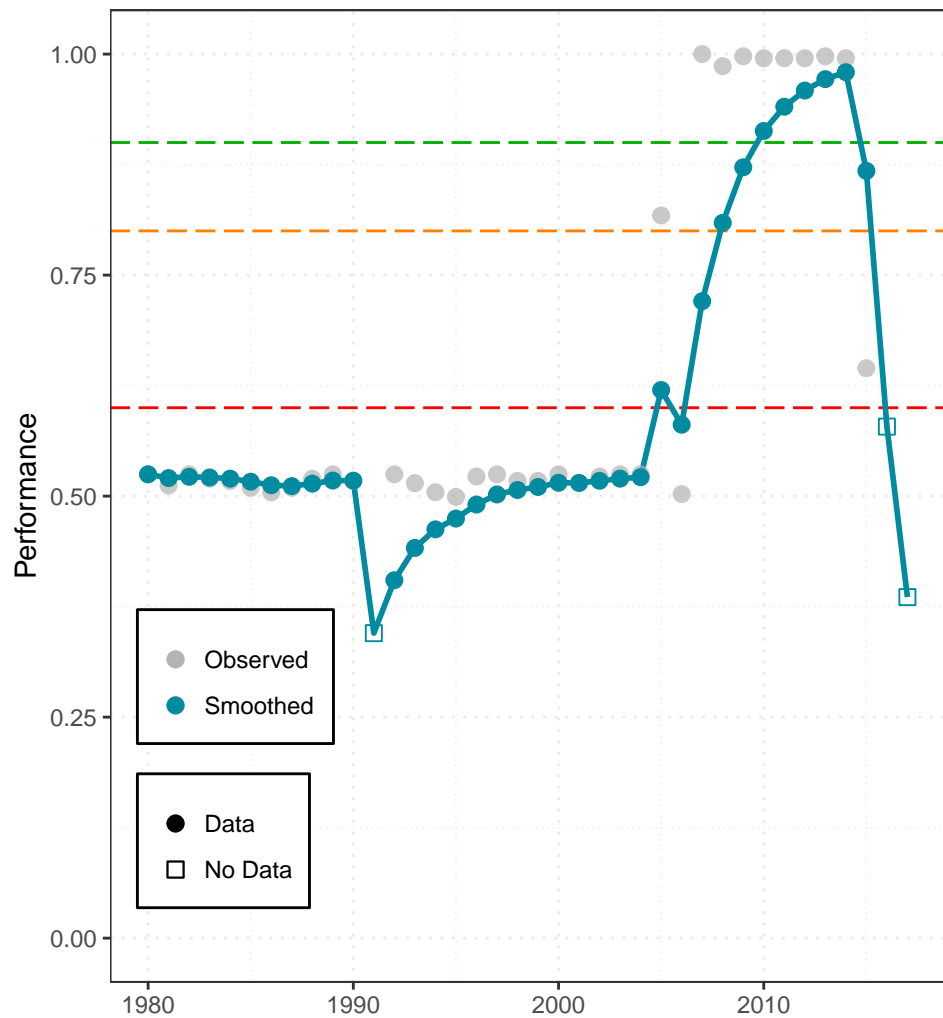

### Completeness

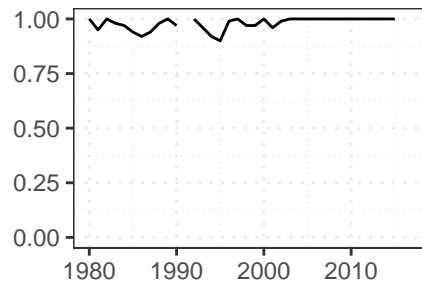

### Age Unspecified

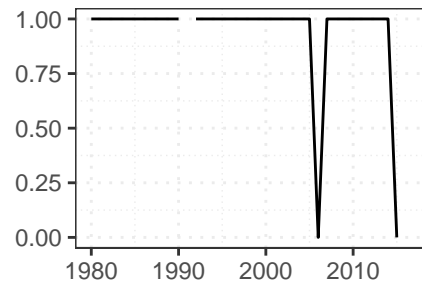

### Sex Unspecified

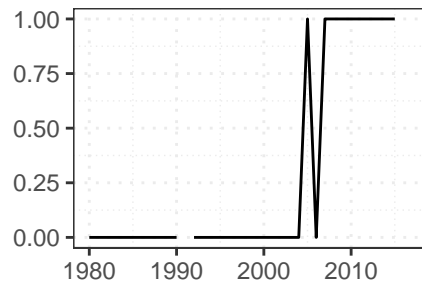

### Birth Order Unspecified

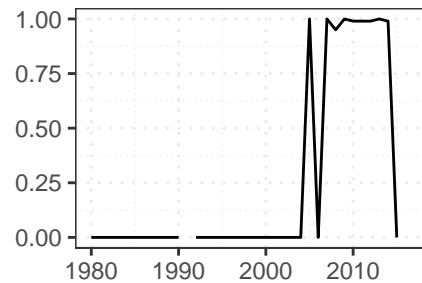

### Birth Weight Unspecified

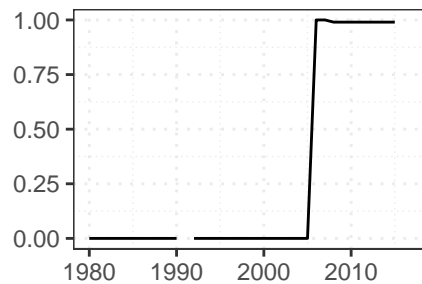

# Montenegro

VSPI-B

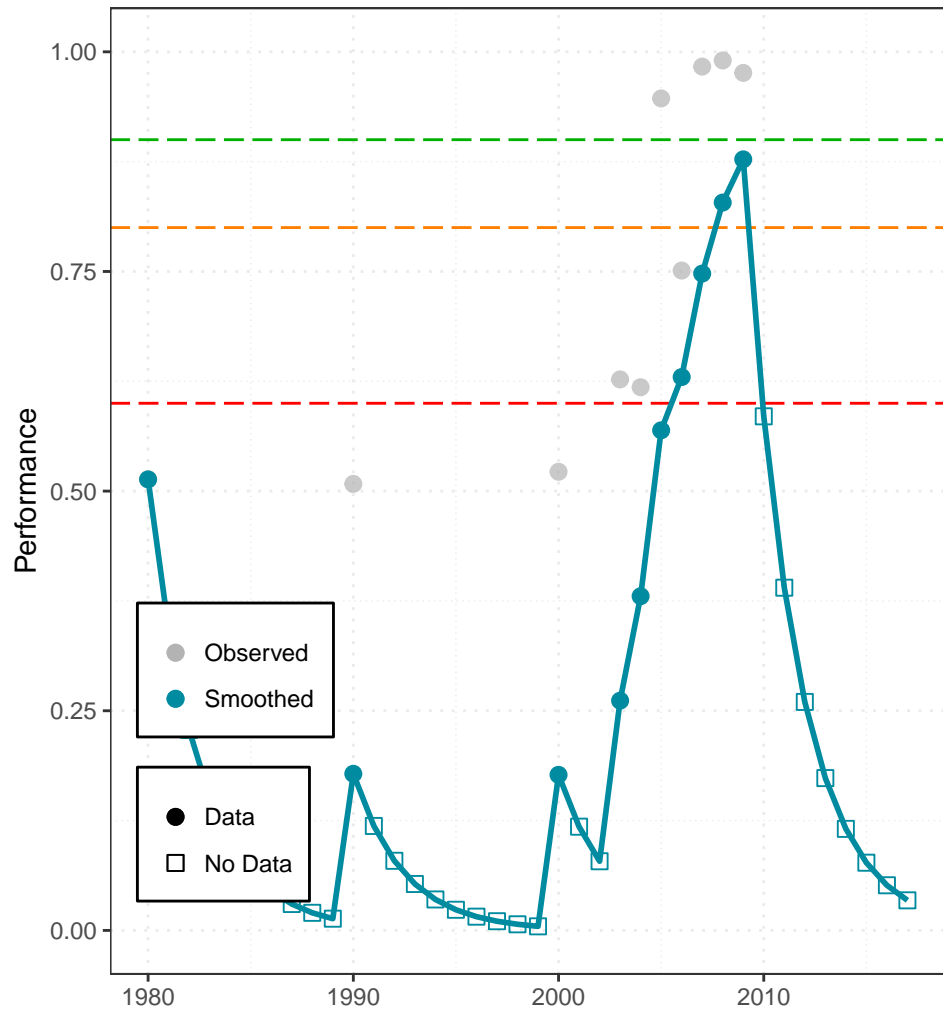

## Completeness

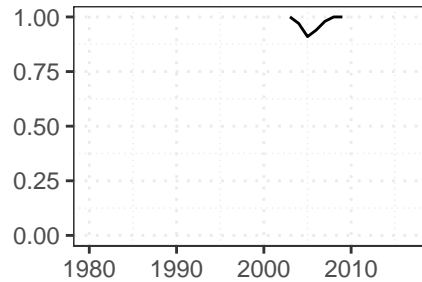

## Age Unspecified

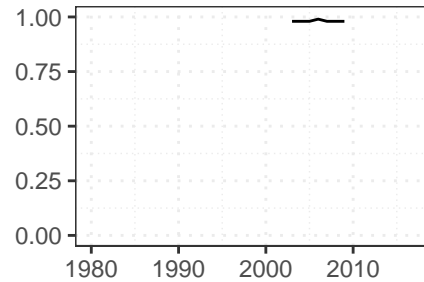

## Sex Unspecified

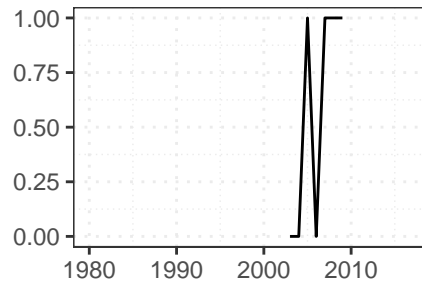

## Birth Order Unspecified

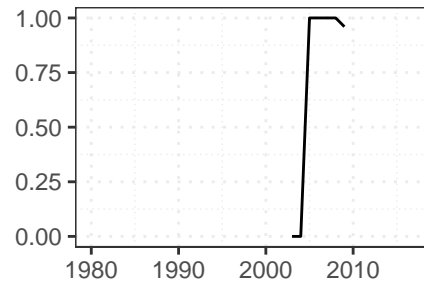

## Birth Weight Unspecified

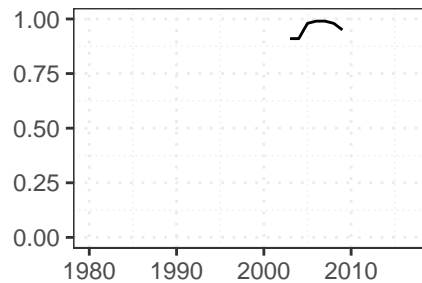

# Mongolia

VSPI-B

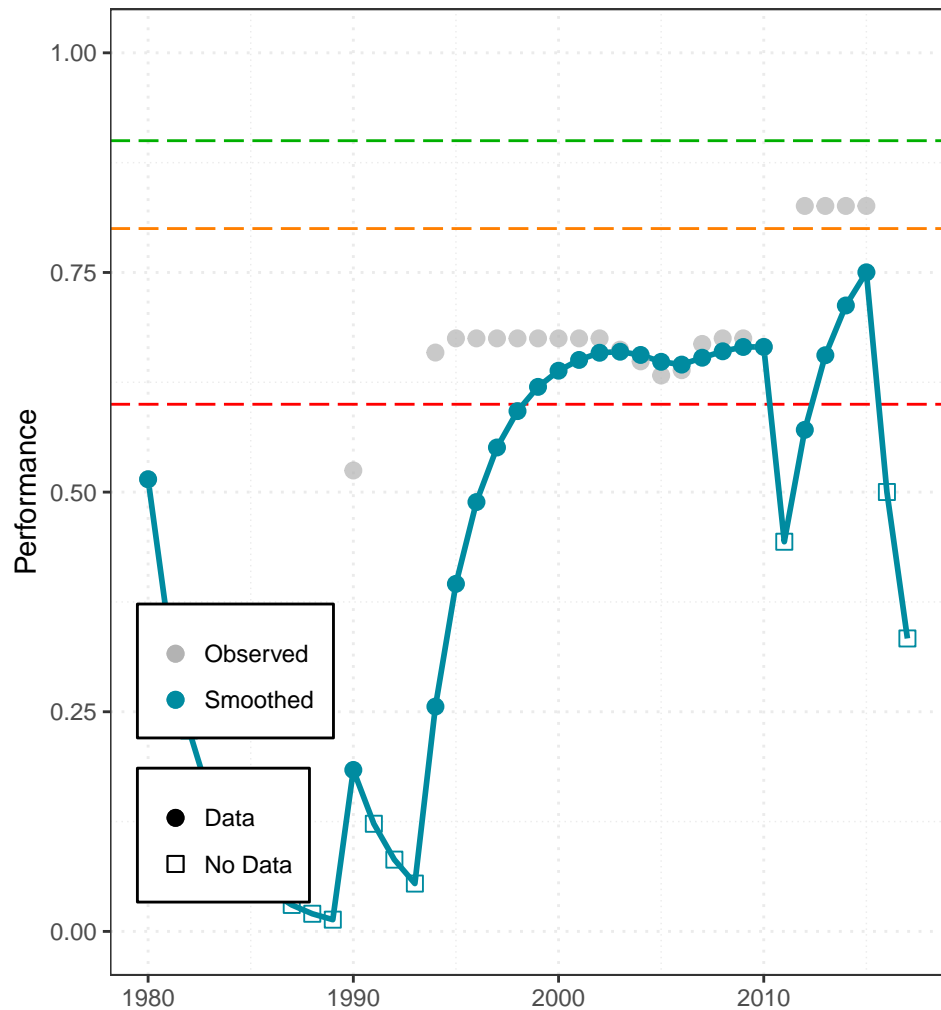

## Completeness

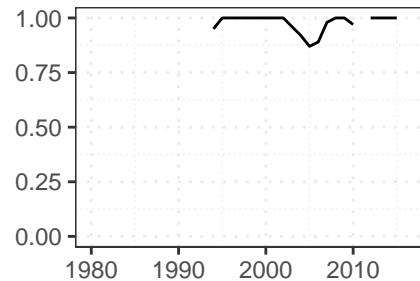

## Age Unspecified

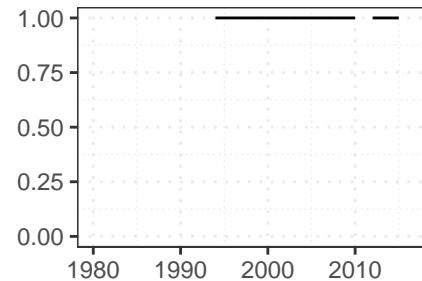

## Sex Unspecified

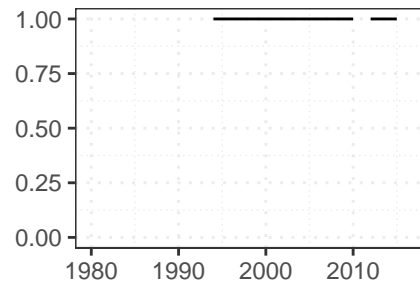

## Birth Order Unspecified

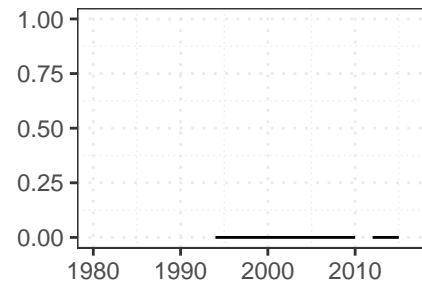

## Birth Weight Unspecified

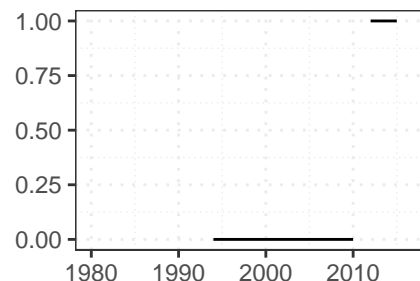

# Mauritius

VSPI-B

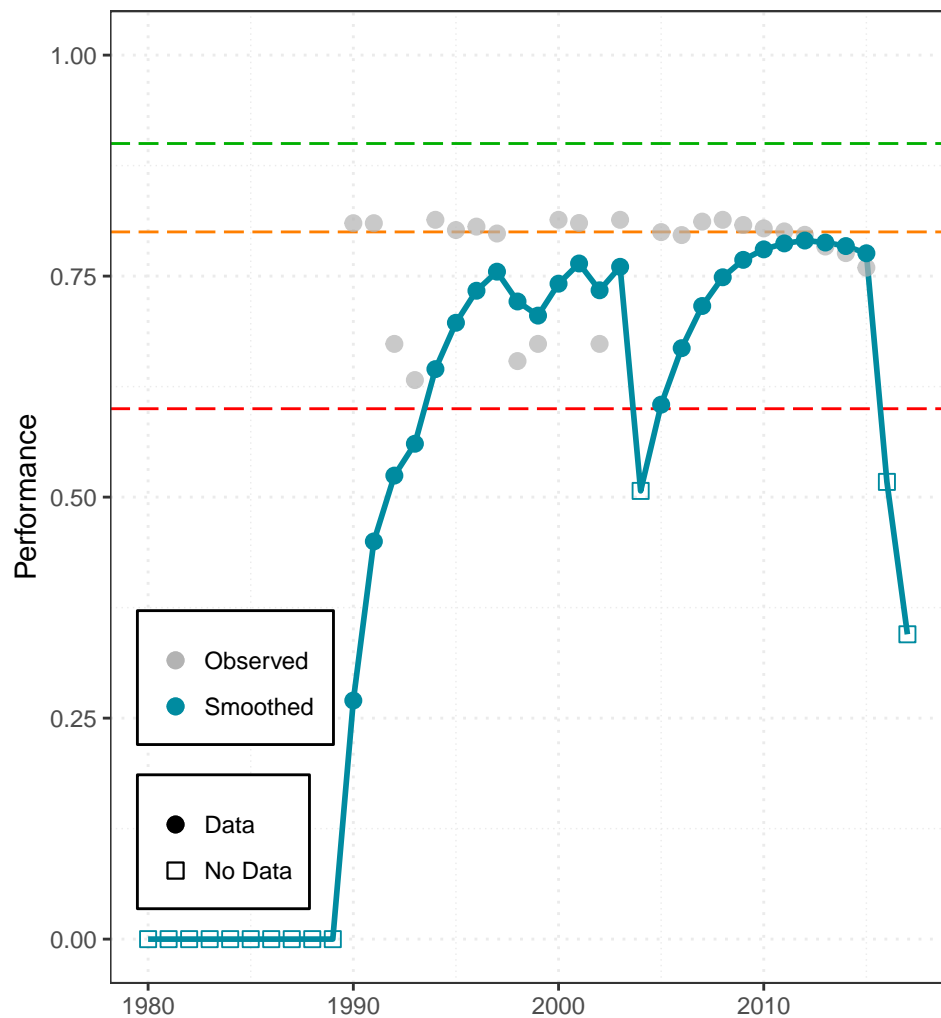

## Completeness

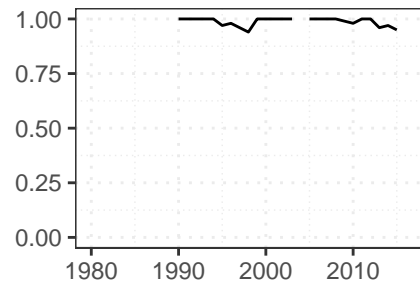

## Age Unspecified

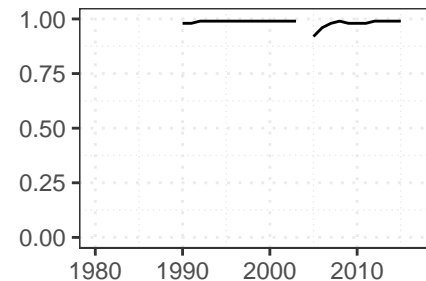

## Sex Unspecified

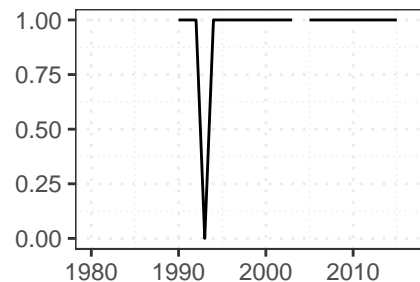

## Birth Order Unspecified

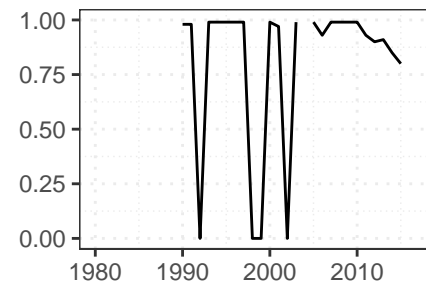

## Birth Weight Unspecified

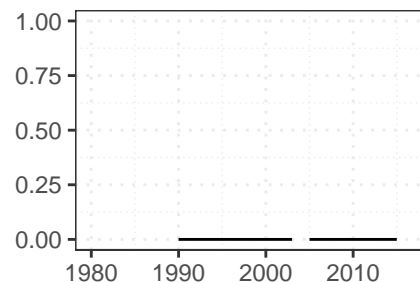

# Malaysia

## VSPI-B

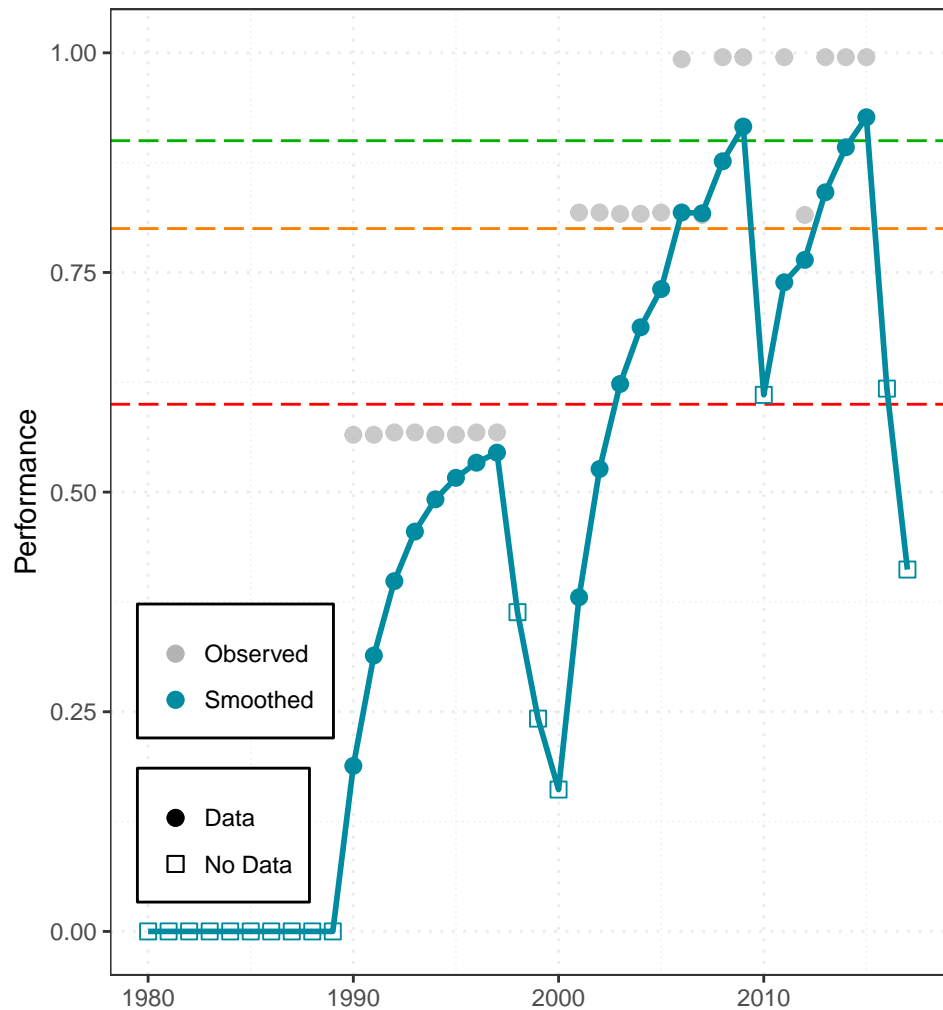

## Completeness

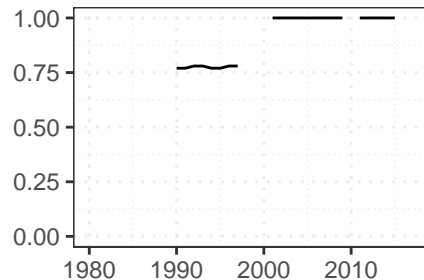

## Age Unspecified

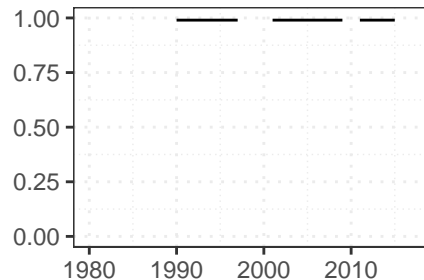

## Sex Unspecified

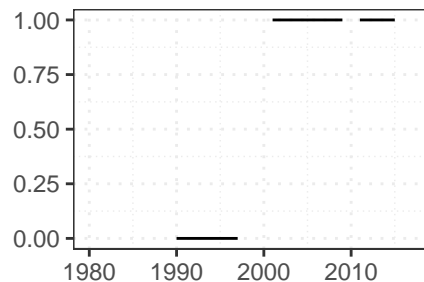

## Birth Order Unspecified

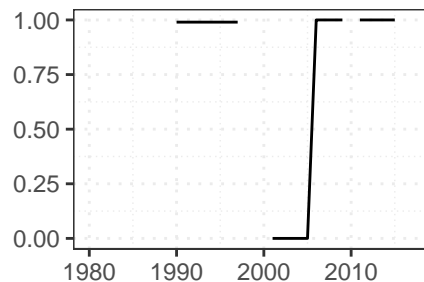

## Birth Weight Unspecified

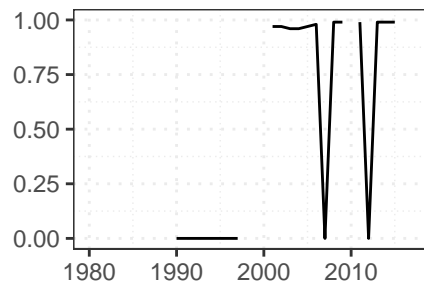





# Norway

VSPI-B

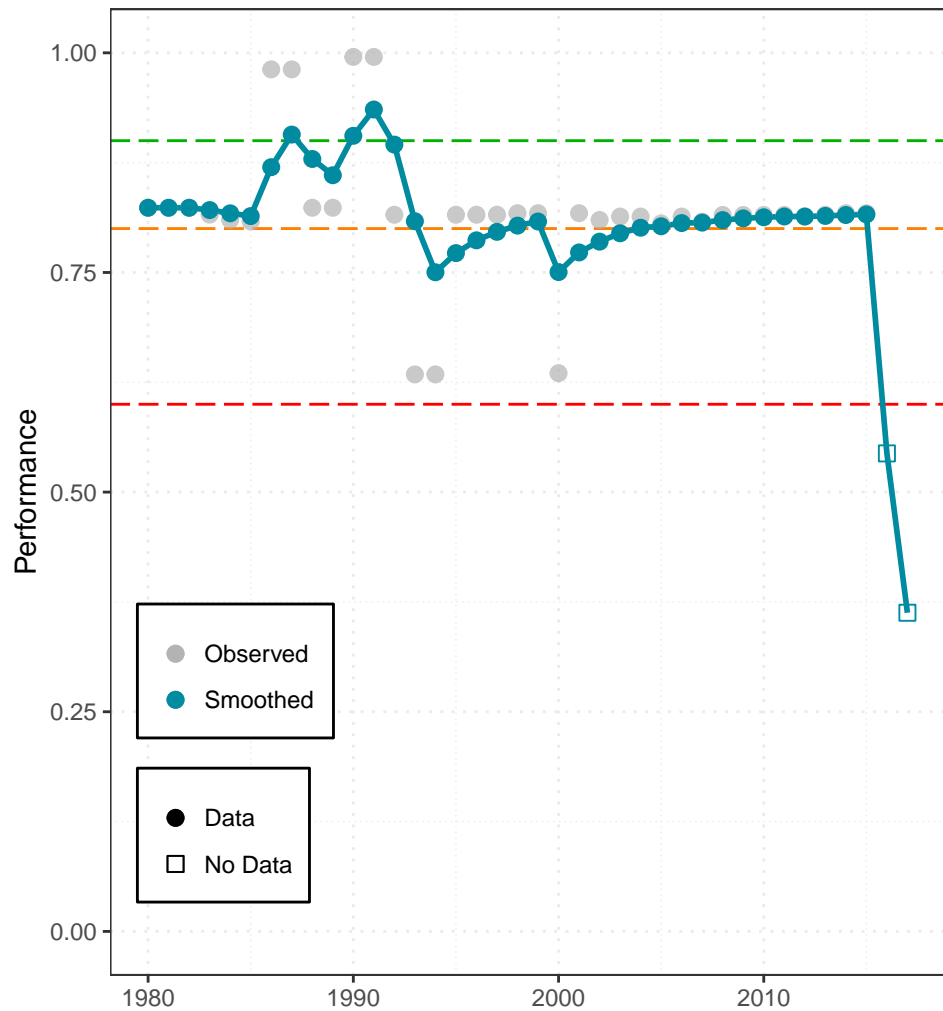

## Completeness

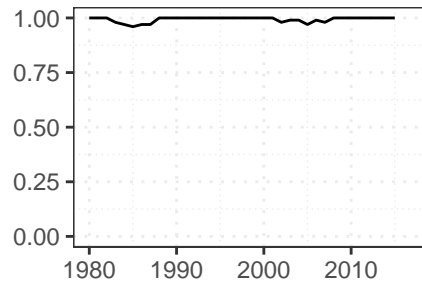

## Age Unspecified

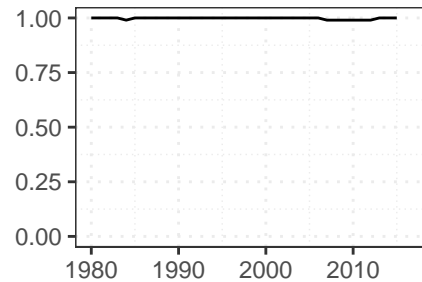

## Sex Unspecified

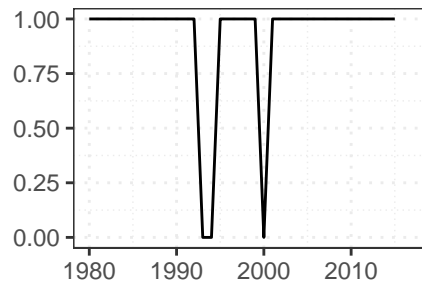

## Birth Order Unspecified

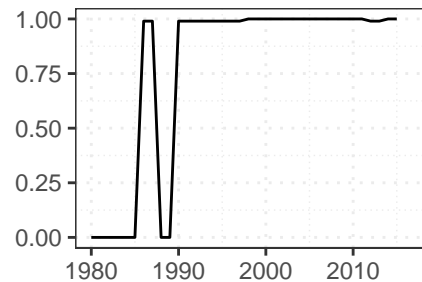

## Birth Weight Unspecified

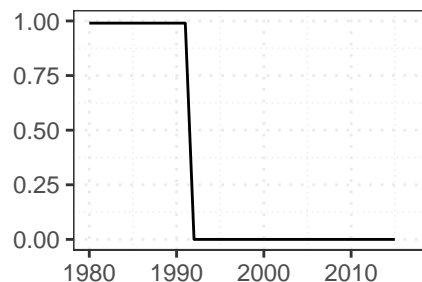

# New Zealand

## VSPI-B

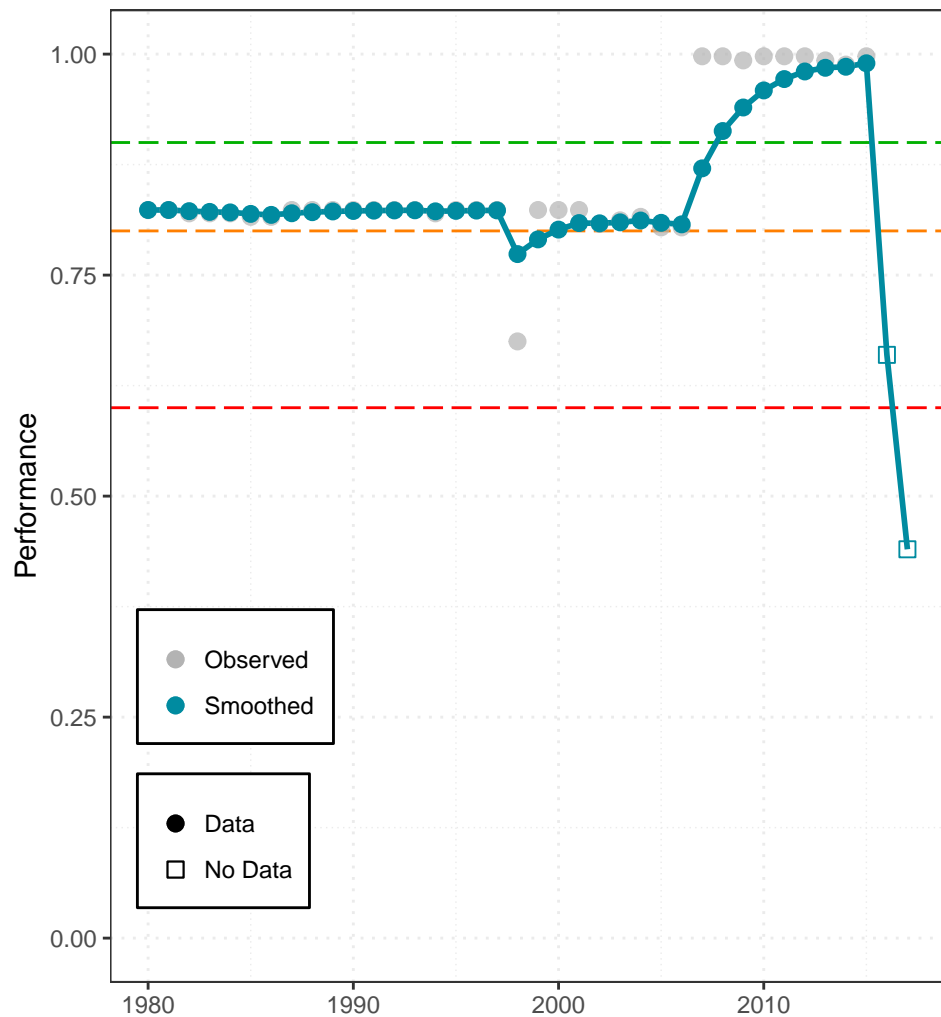

## Completeness

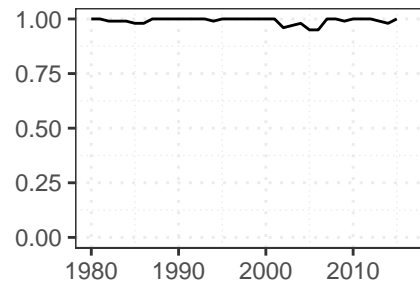

## Age Unspecified



## Sex Unspecified

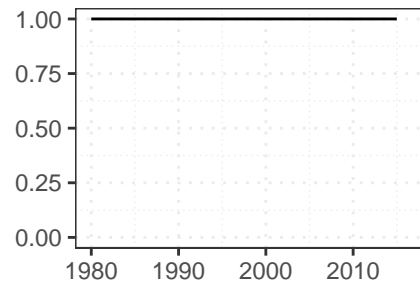

## Birth Order Unspecified

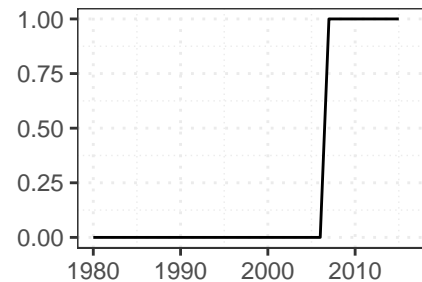

## Birth Weight Unspecified

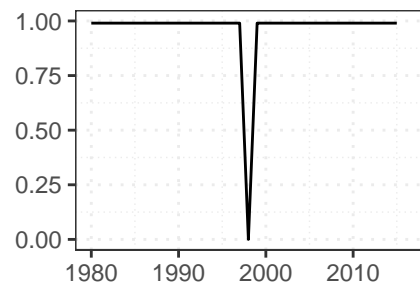

# Oman VSPI-B

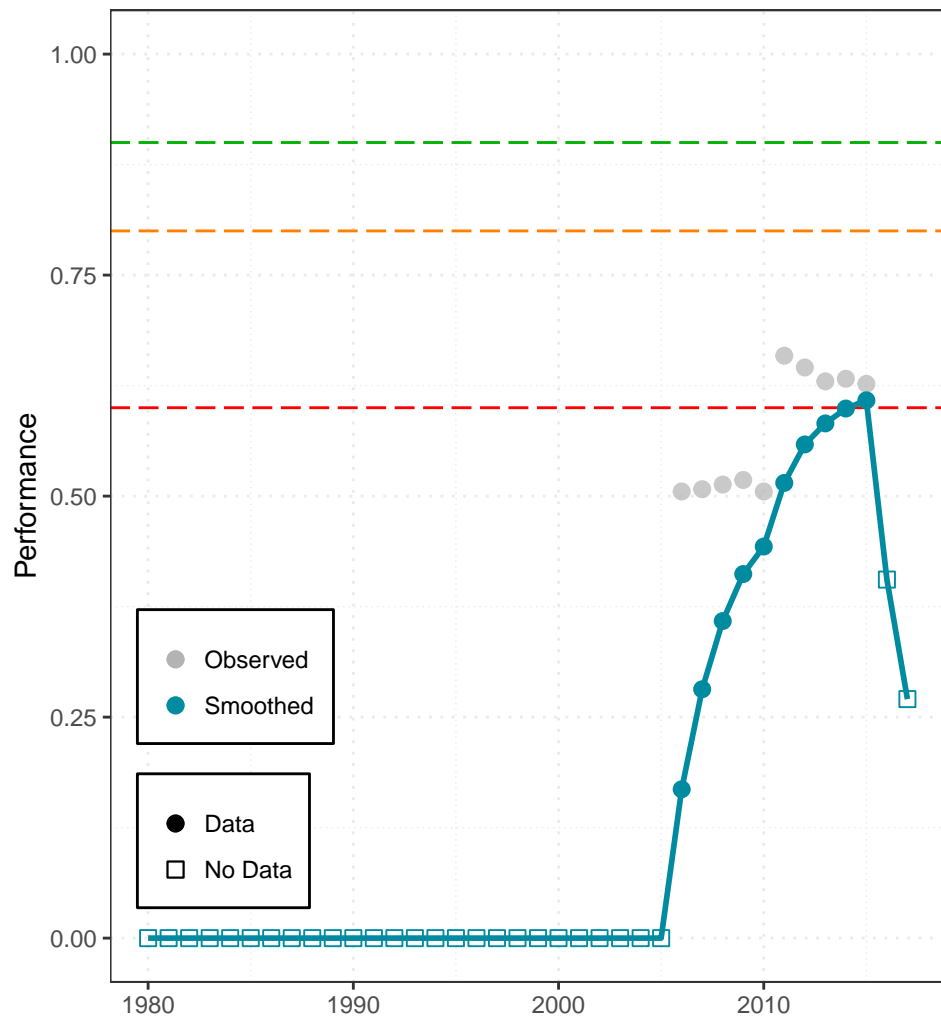

## Completeness

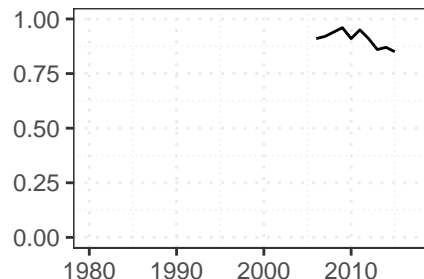

## Age Unspecified

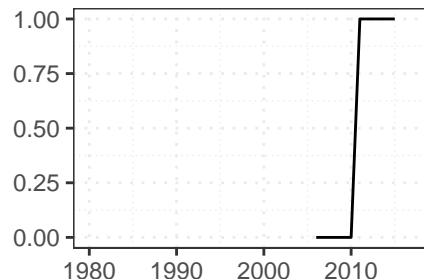

## Sex Unspecified

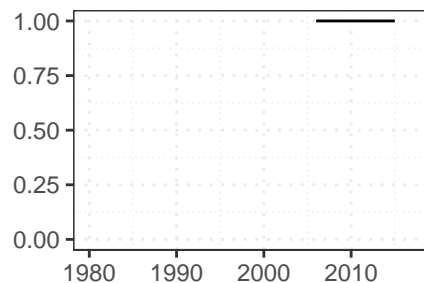

## Birth Order Unspecified

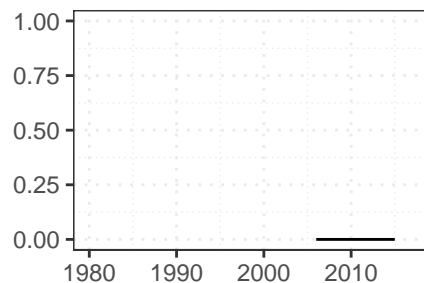

## Birth Weight Unspecified

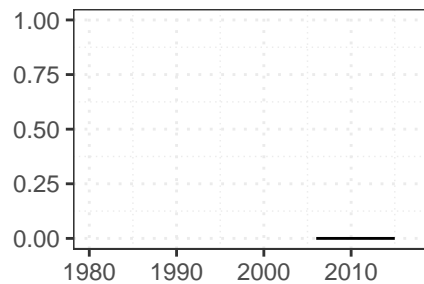

# Panama

## VSPI-B

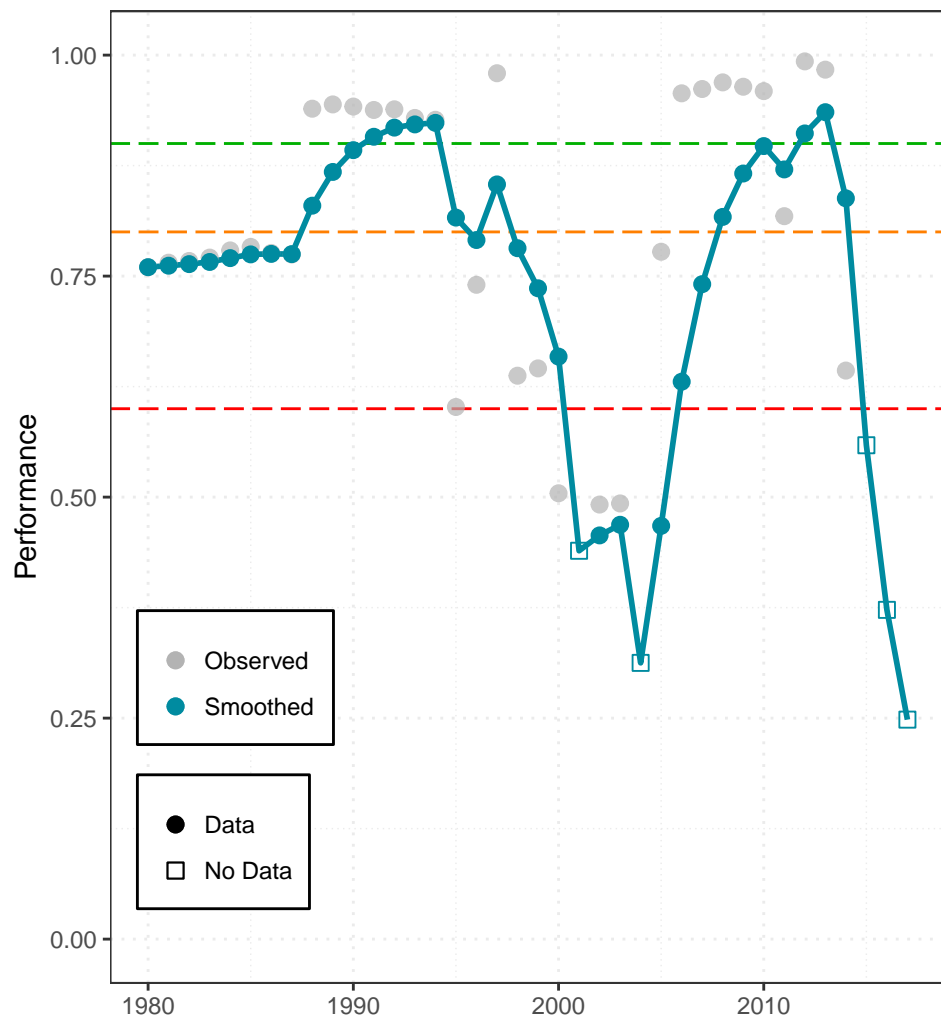

# Completeness

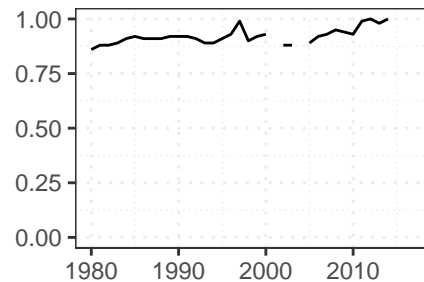

# Age Unspecified

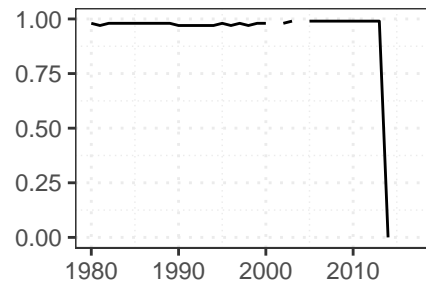

# Sex Unspecified

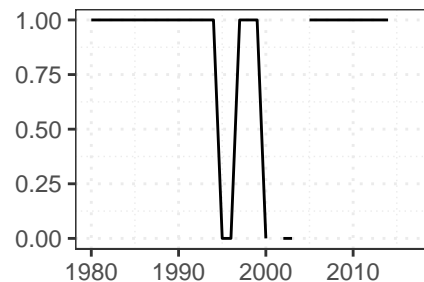

# Birth Order Unspecified

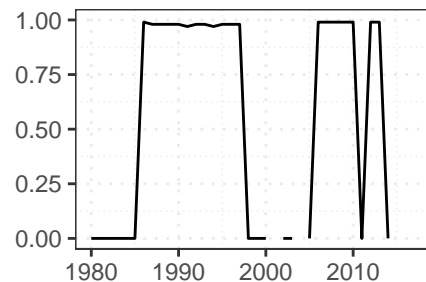

# Birth Weight Unspecified

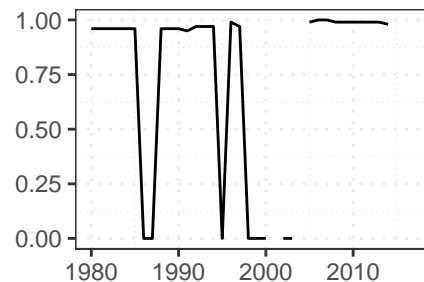

# Peru VSPI-B

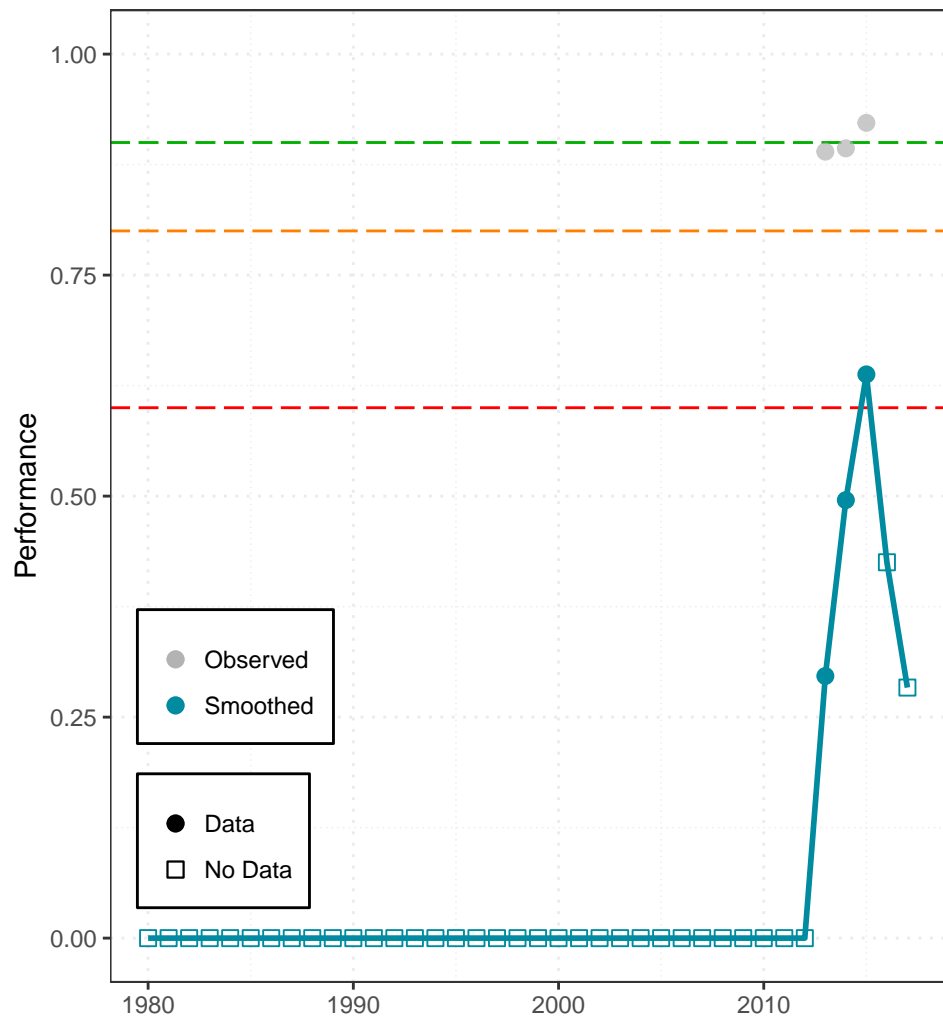

## Completeness

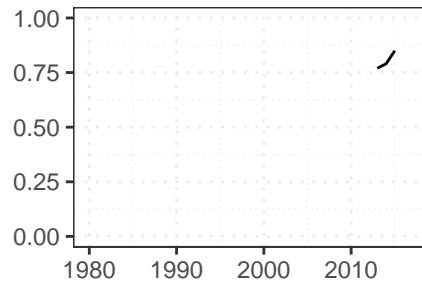

## Age Unspecified

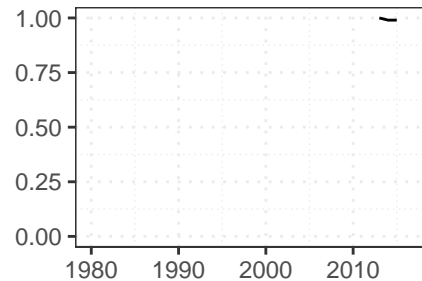

## Sex Unspecified

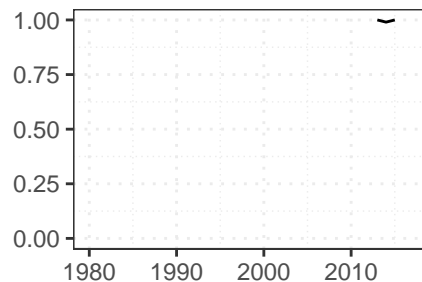

## Birth Order Unspecified

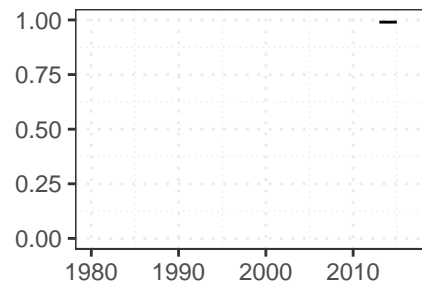

## Birth Weight Unspecified

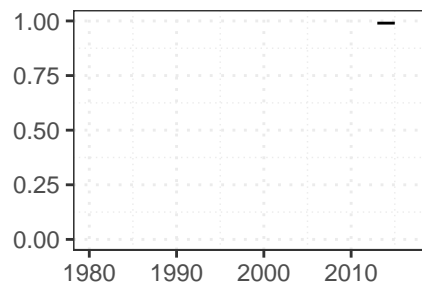

# Philippines

VSPI-B

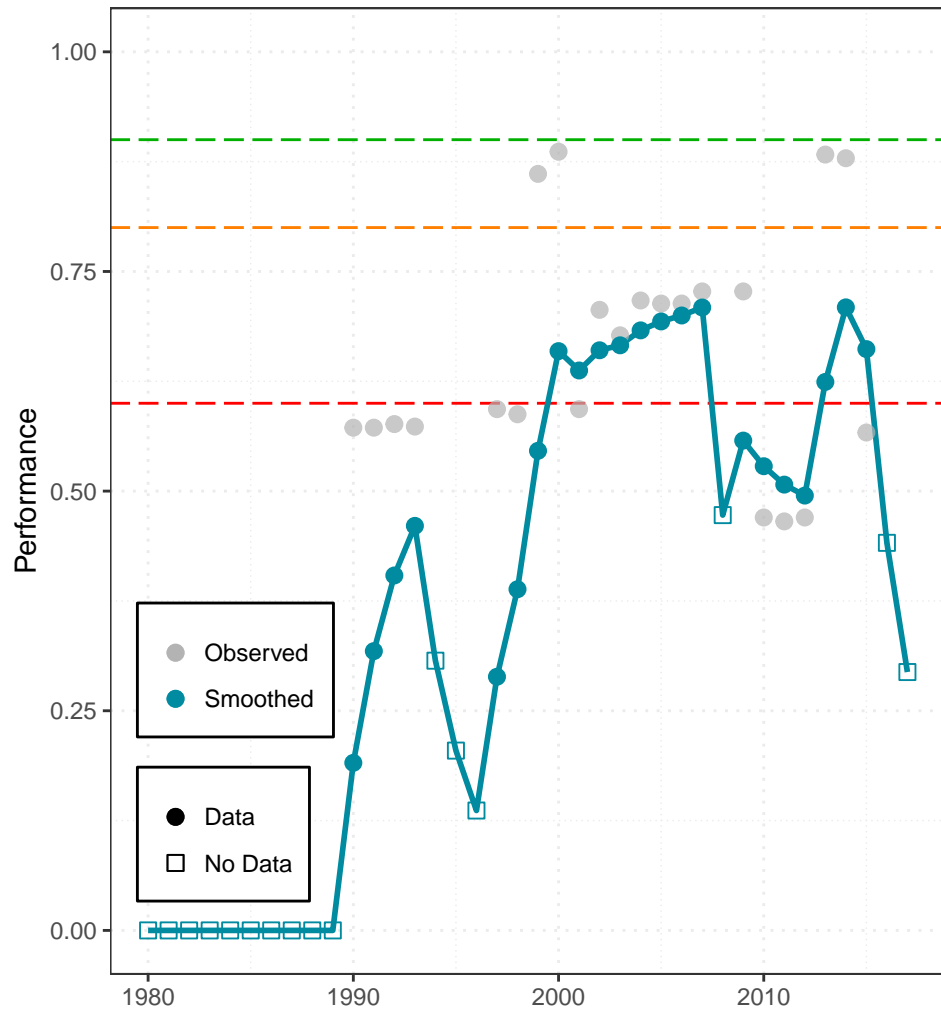

## Completeness

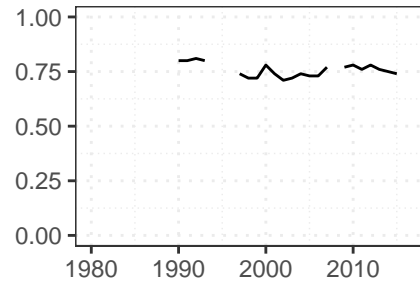

## Age Unspecified

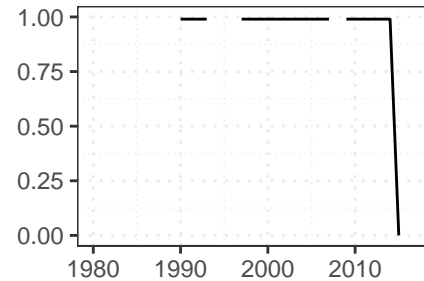

## Sex Unspecified

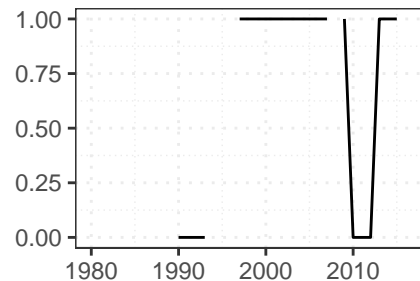

## Birth Order Unspecified

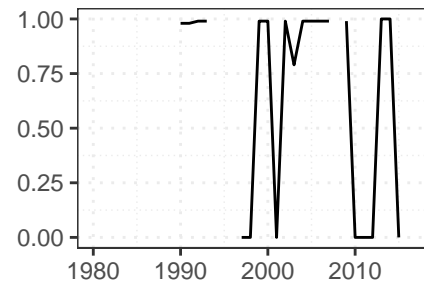

## Birth Weight Unspecified

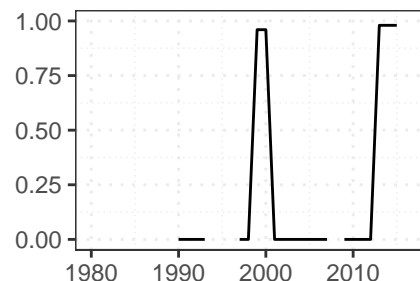

# Poland VSPI-B

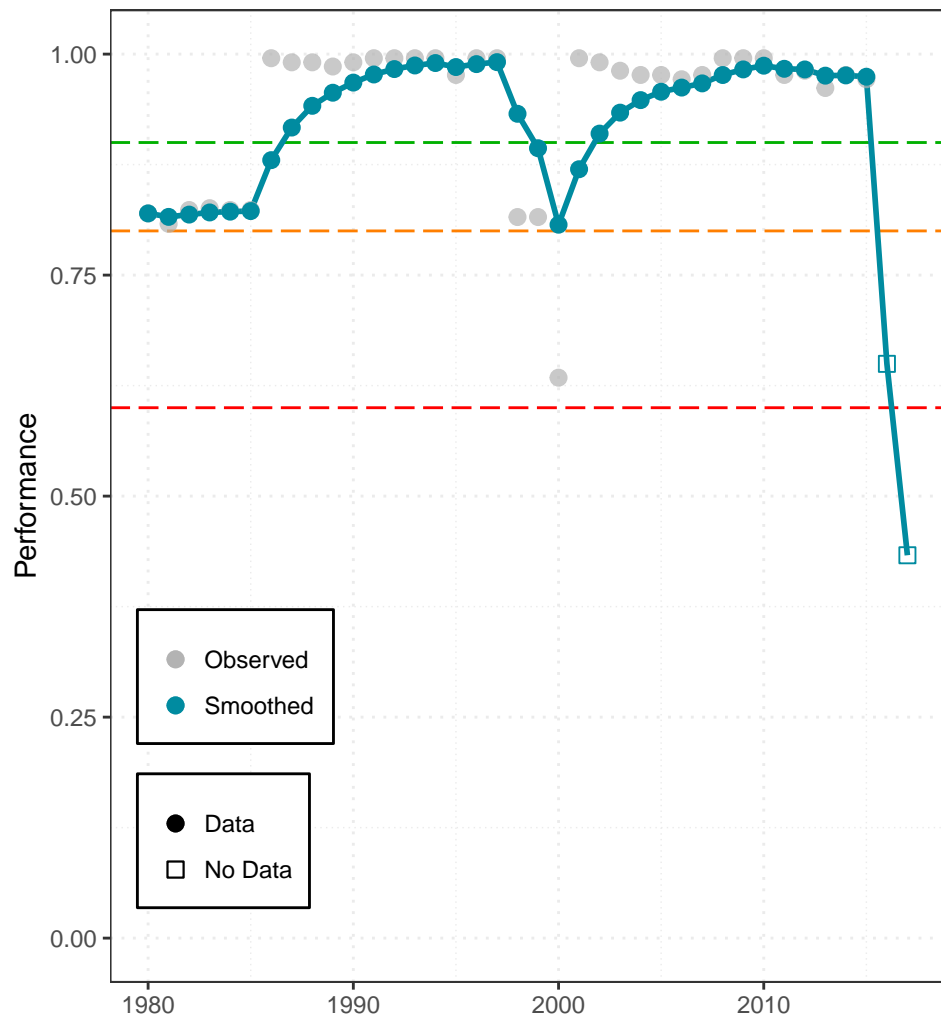

## Completeness

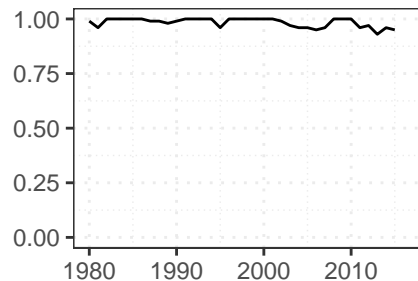

## Age Unspecified

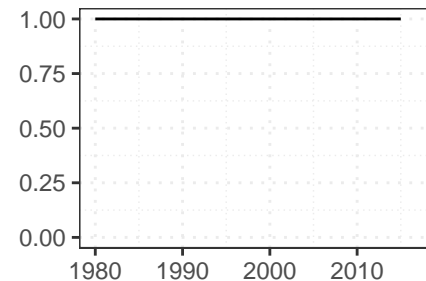

## Sex Unspecified

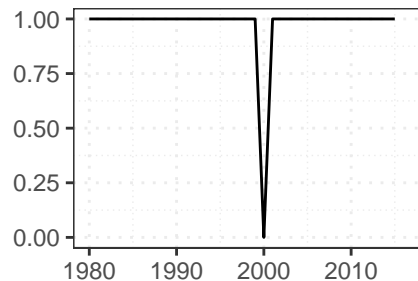

## Birth Order Unspecified

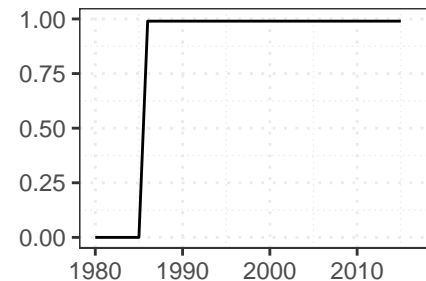

## Birth Weight Unspecified

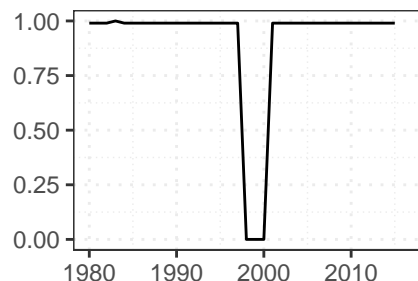



# Puerto Rico

## VSPI-B

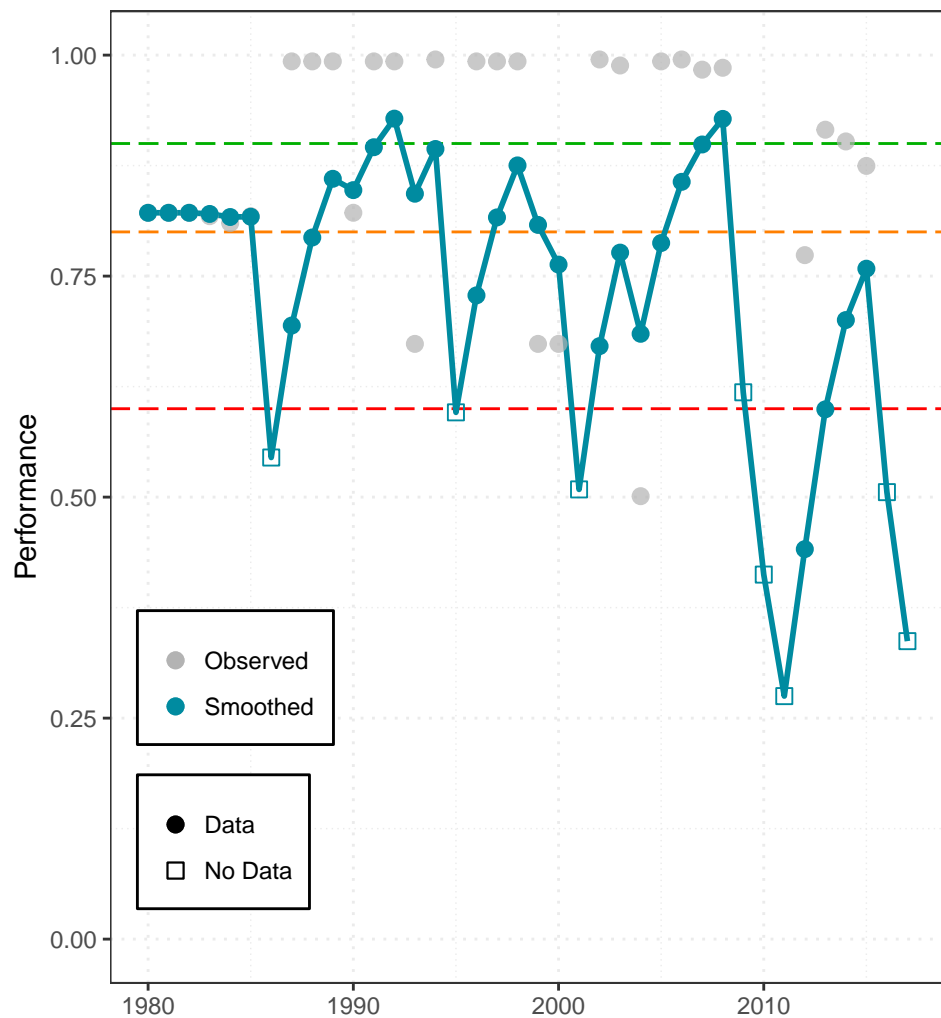

# Completeness

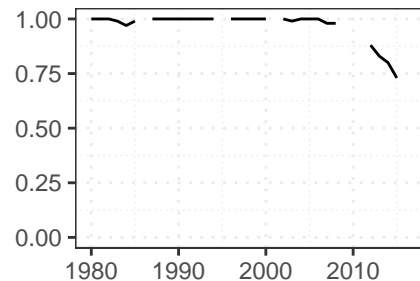

# Age Unspecified

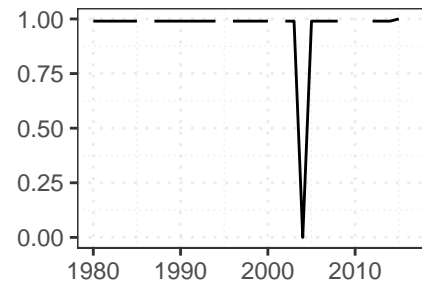

# Sex Unspecified

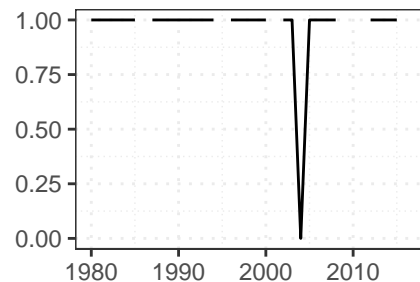

# Birth Order Unspecified

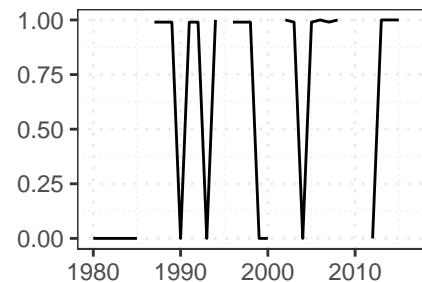

# Birth Weight Unspecified

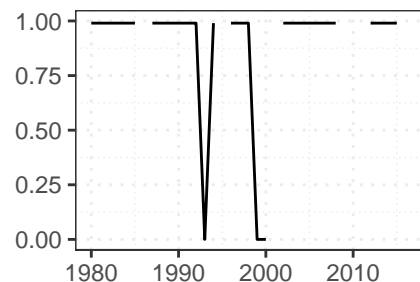

# Portugal

## VSPI-B

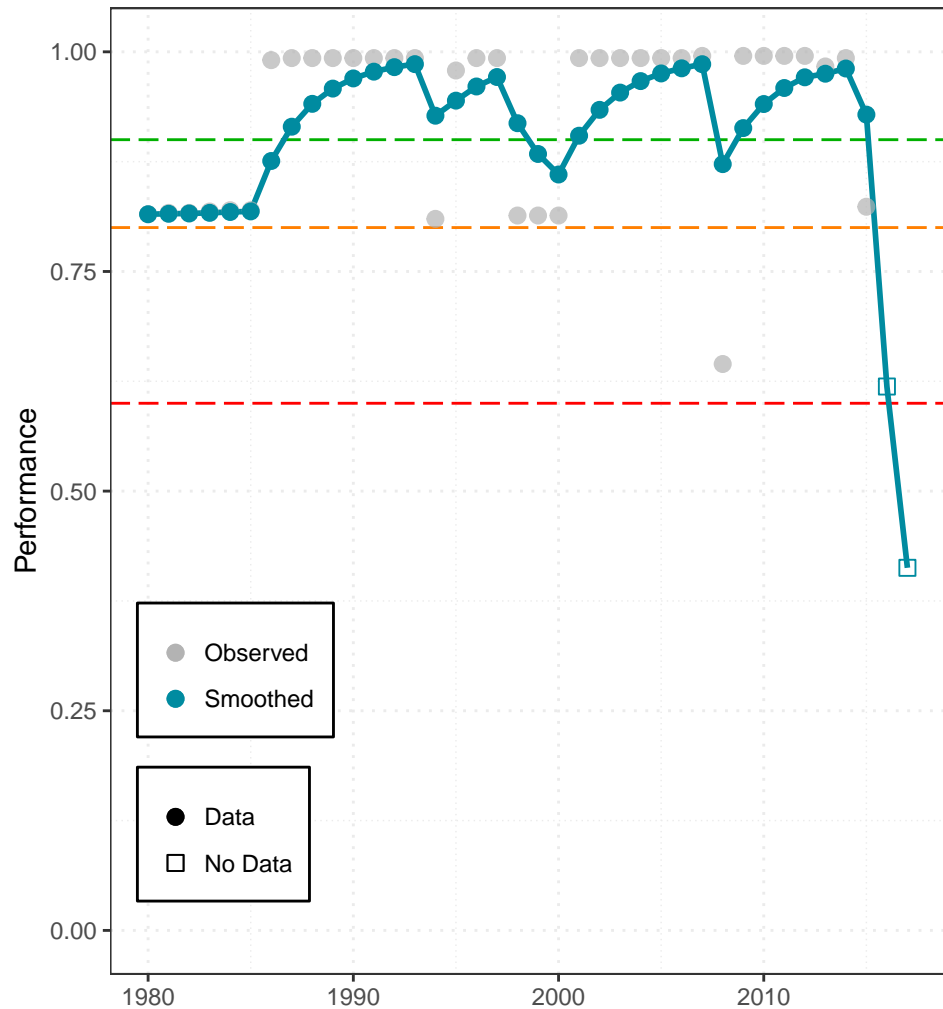

## Completeness

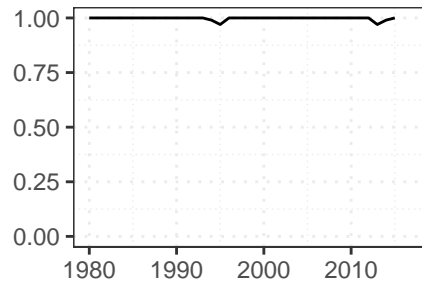

## Age Unspecified

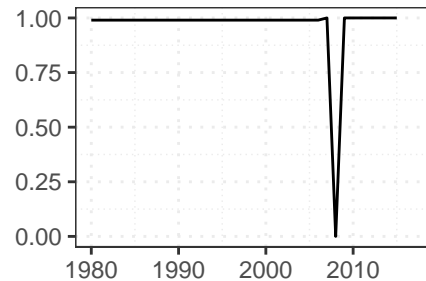

## Sex Unspecified

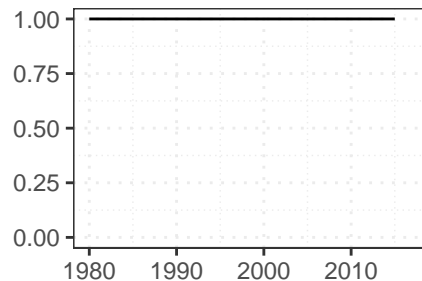

## Birth Order Unspecified

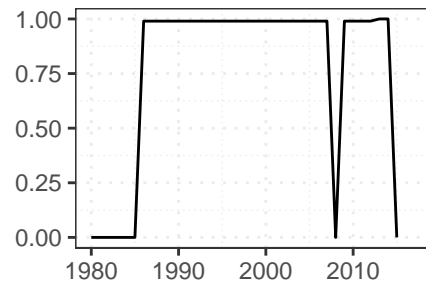

## Birth Weight Unspecified

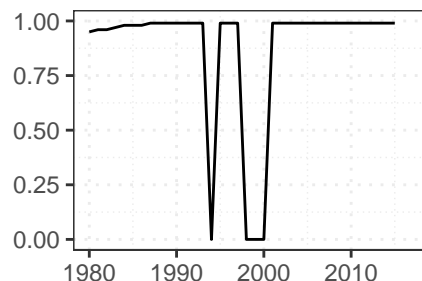

# Qatar

VSPI-B

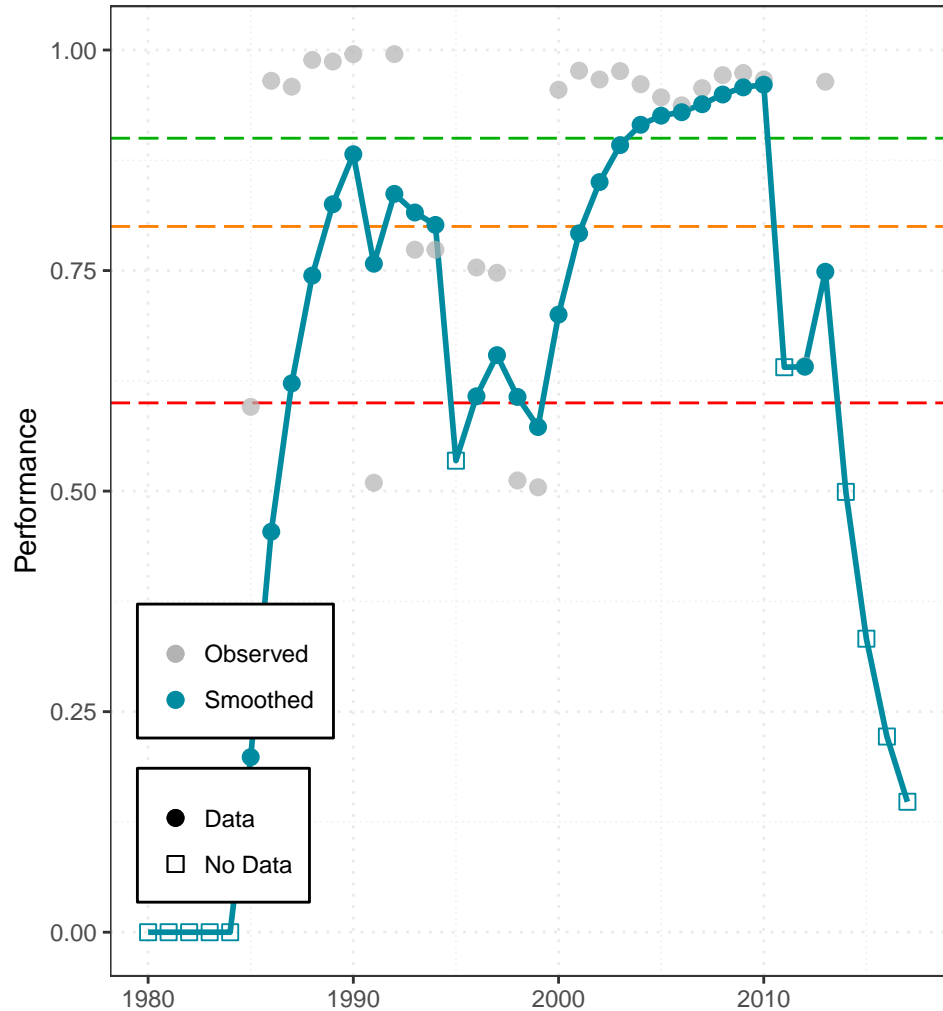

# Completeness

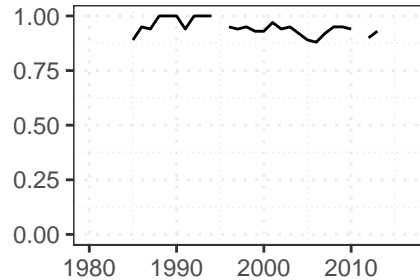

# Age Unspecified

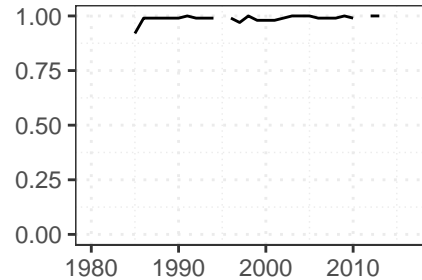

# Sex Unspecified

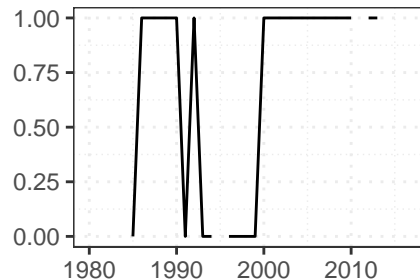

# Birth Order Unspecified

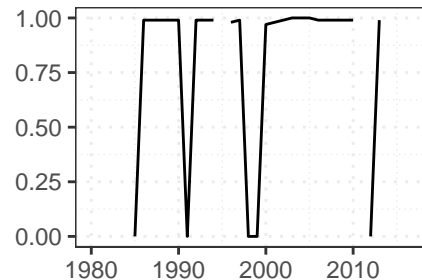

# Birth Weight Unspecified

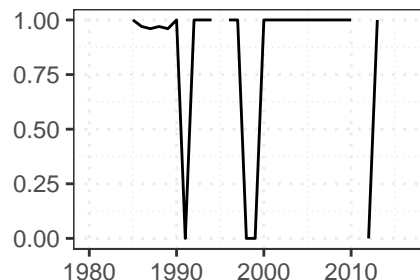

# Romania

VSPI-B

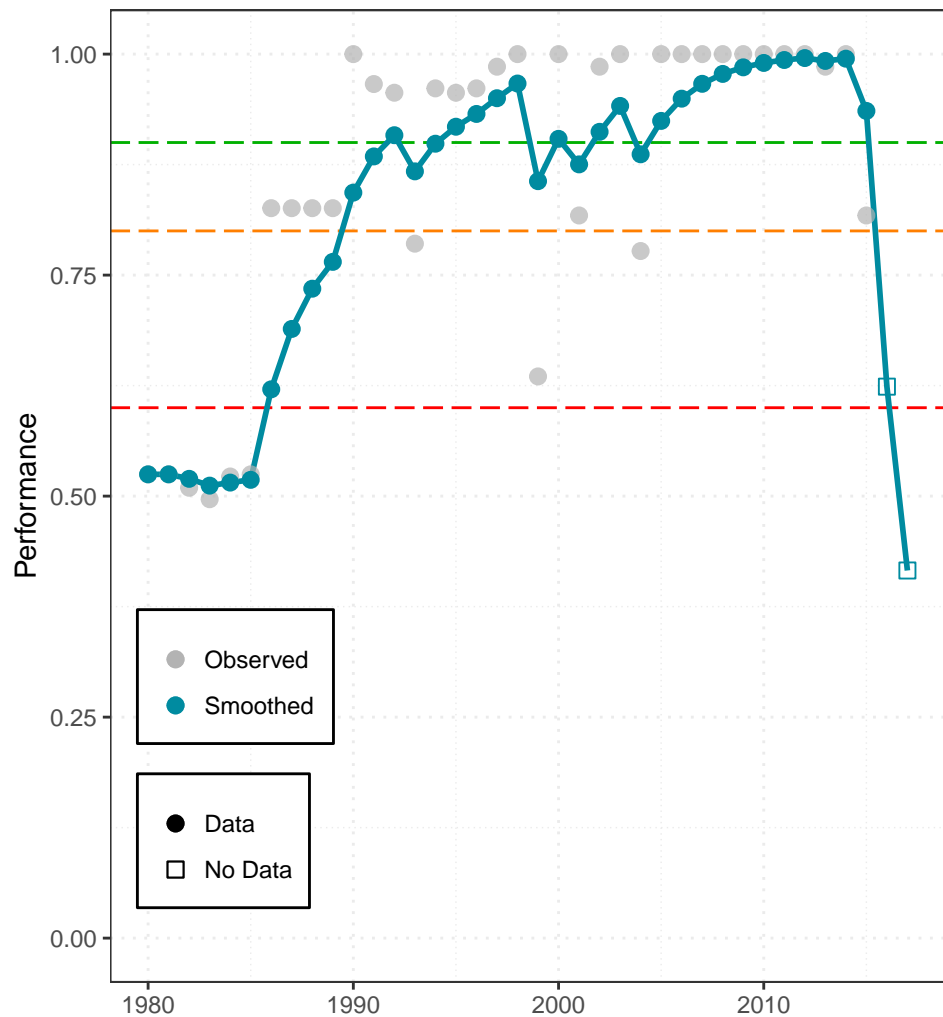

# Completeness

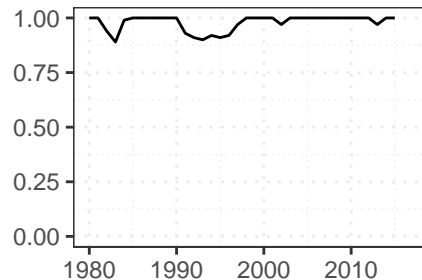

# Age Unspecified

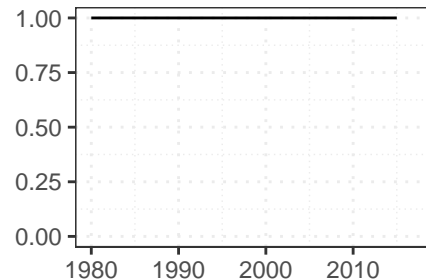

# Sex Unspecified

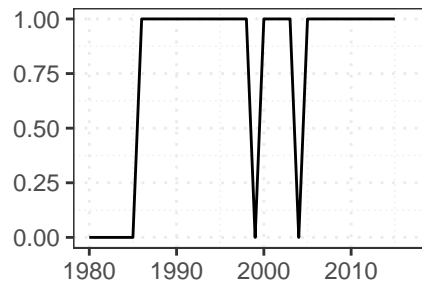

# Birth Order Unspecified

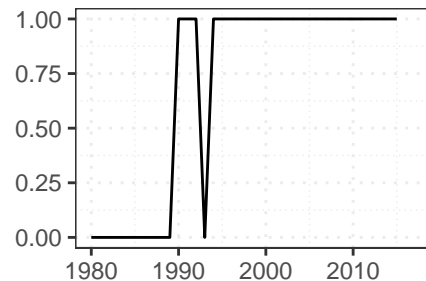

# Birth Weight Unspecified

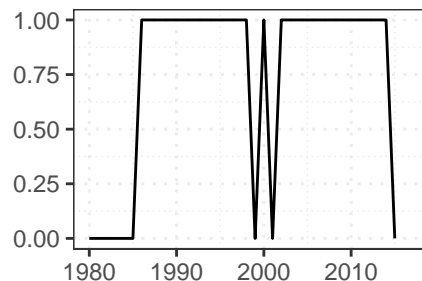

# Russia

## VSPI-B

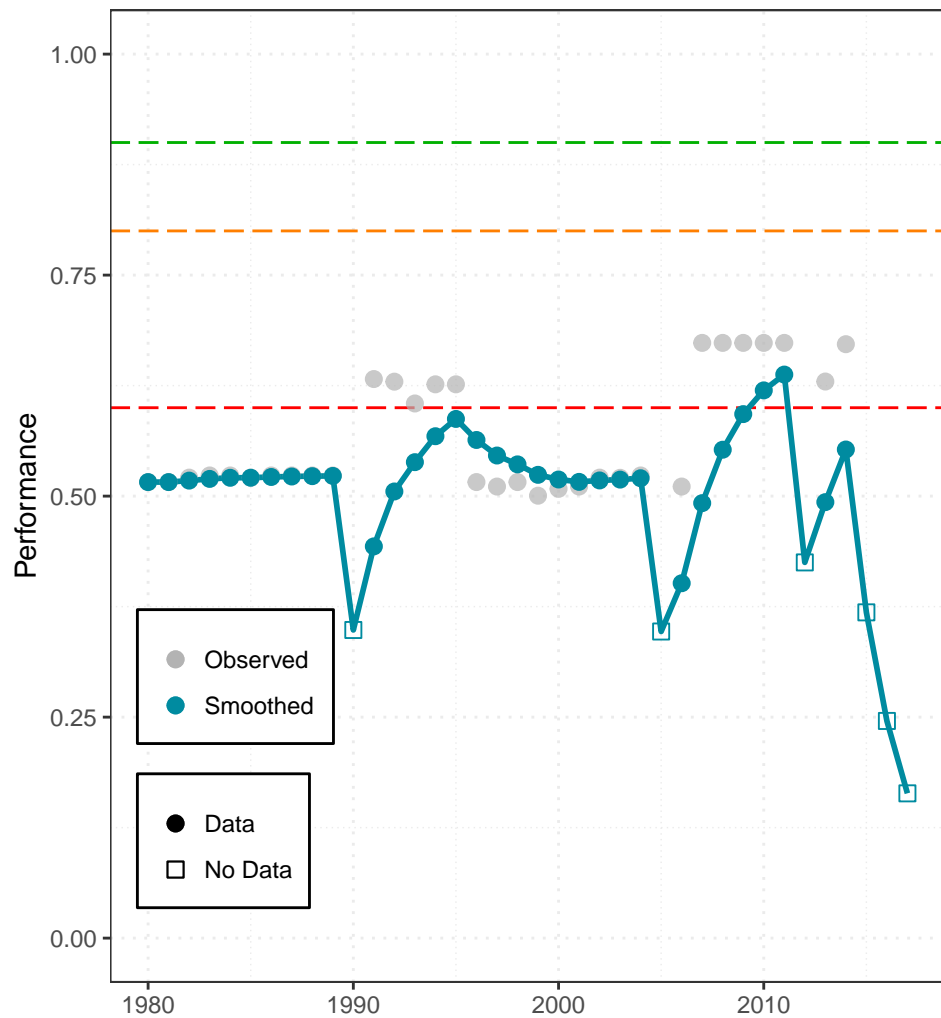

## Completeness

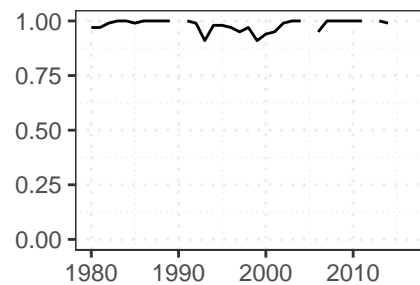

## Age Unspecified

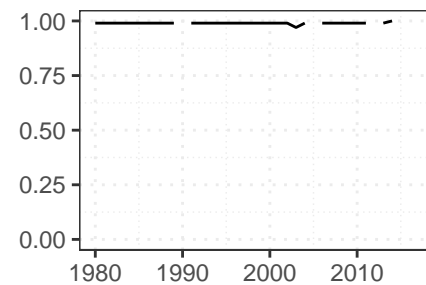

## Sex Unspecified

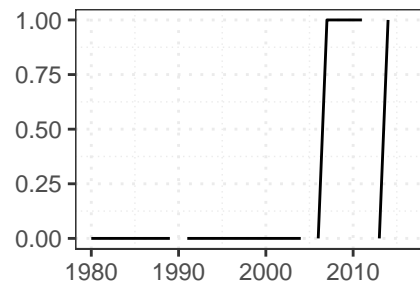

## Birth Order Unspecified

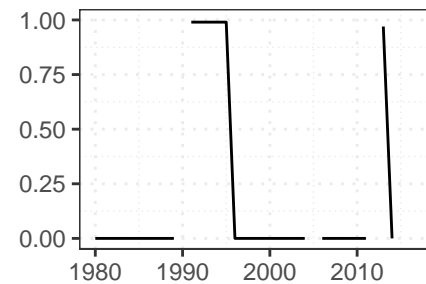

## Birth Weight Unspecified

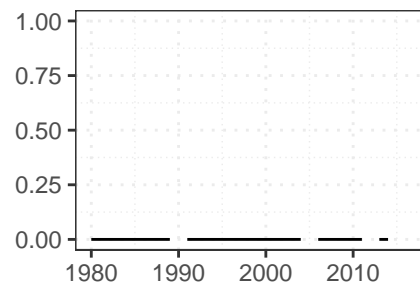

# Singapore

VSPI-B

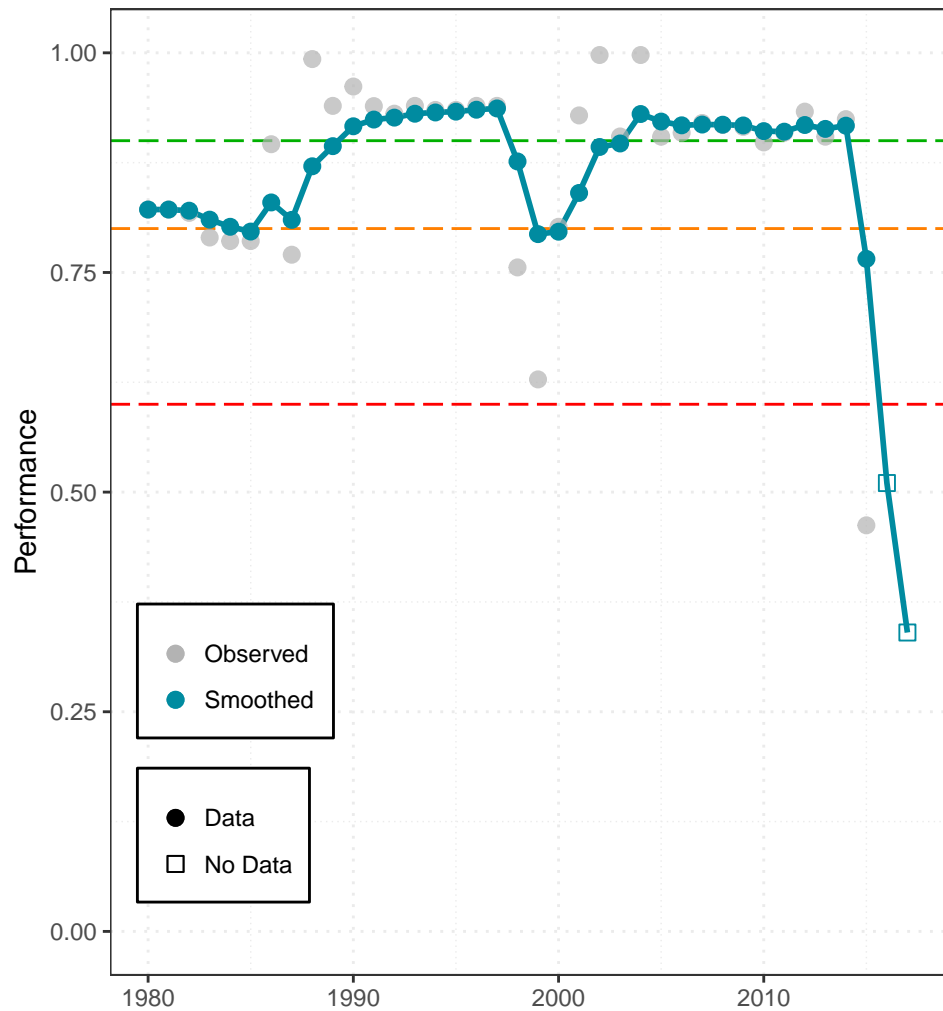

## Completeness

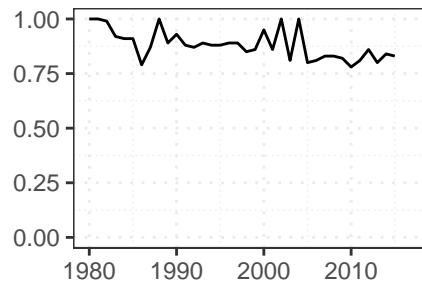

## Age Unspecified

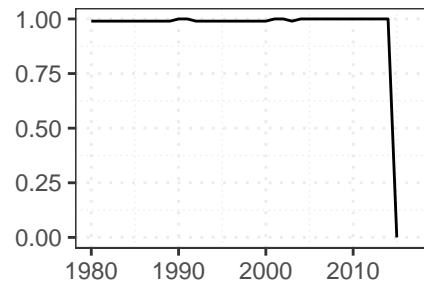

## Sex Unspecified

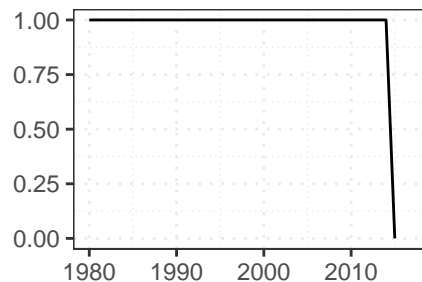

## Birth Order Unspecified

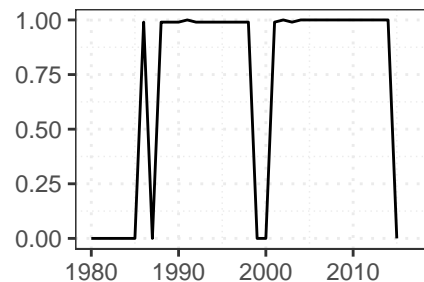

## Birth Weight Unspecified

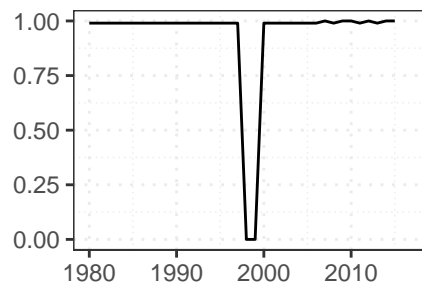

# El Salvador

VSPI-B

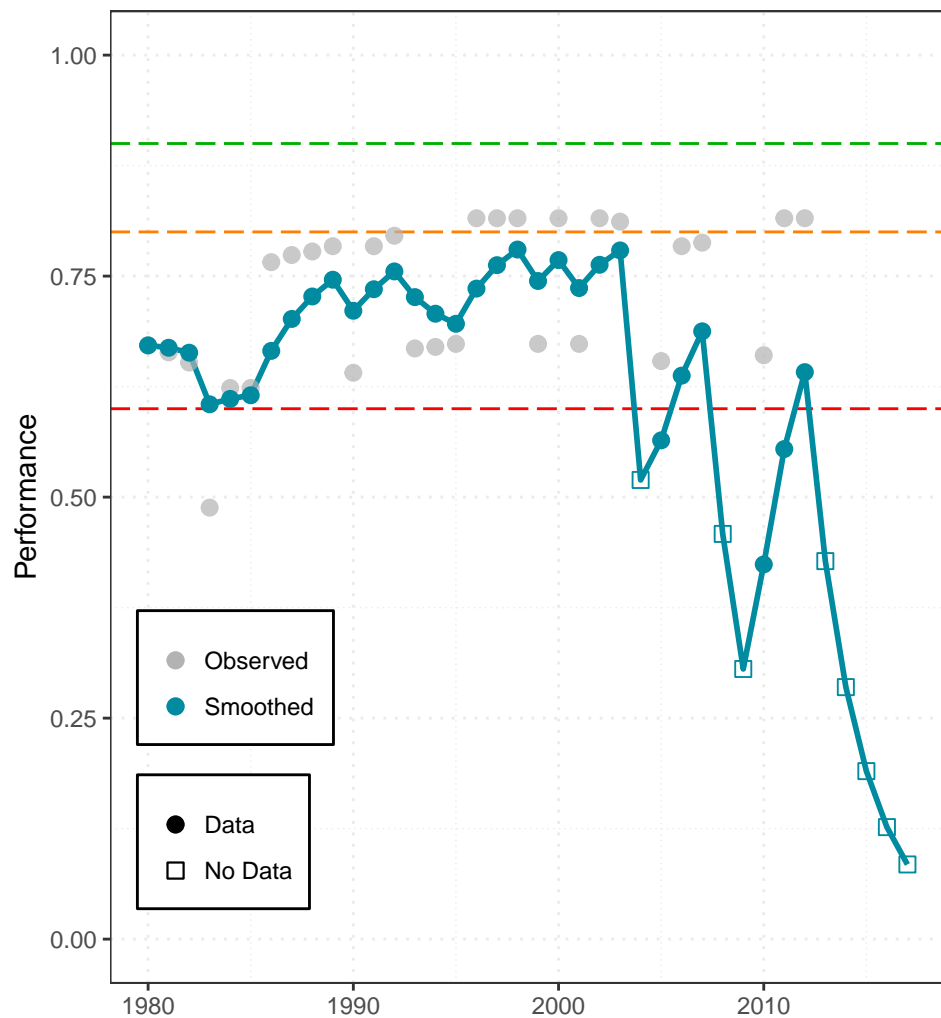

## Completeness

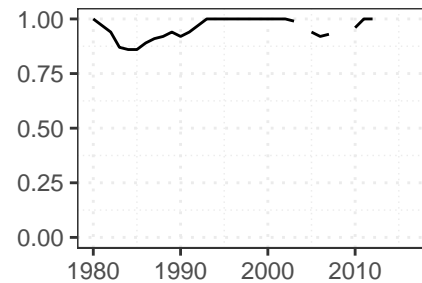

## Age Unspecified

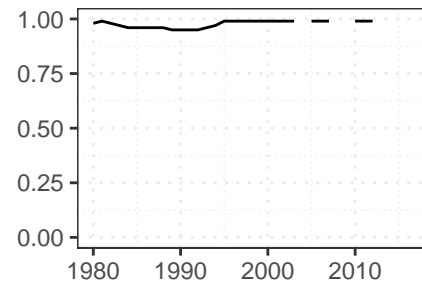

## Sex Unspecified

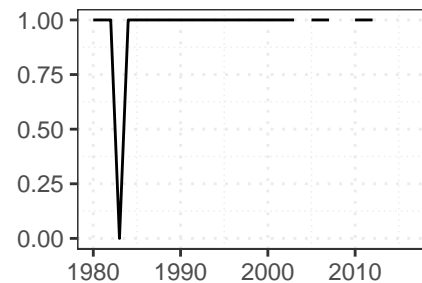

## Birth Order Unspecified

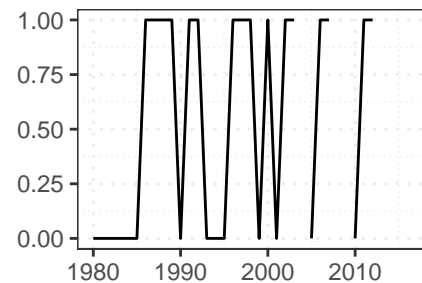

## Birth Weight Unspecified

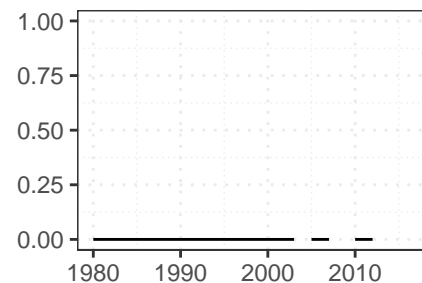

# Serbia VSPI-B

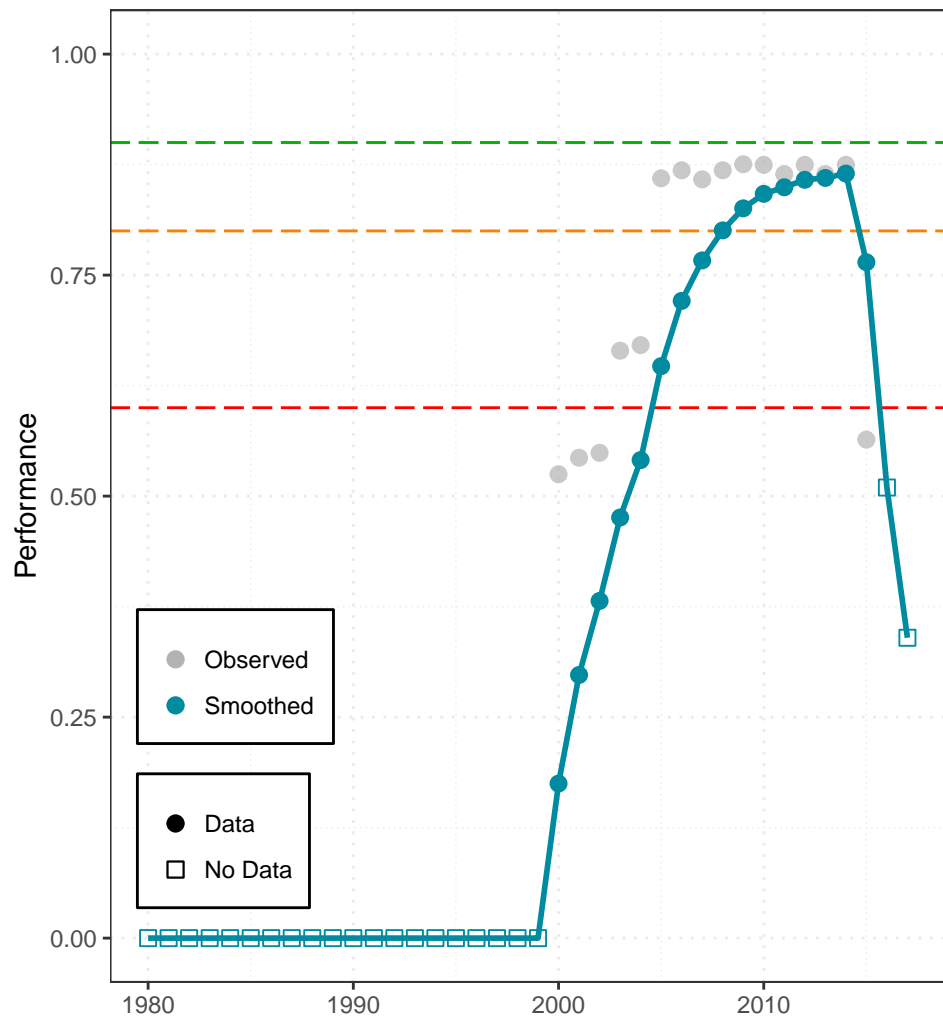

## Completeness

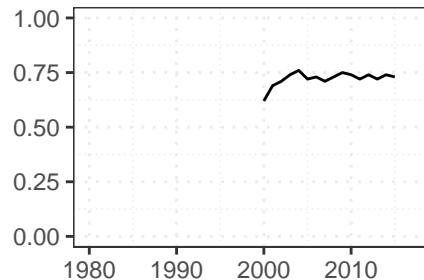

## Age Unspecified

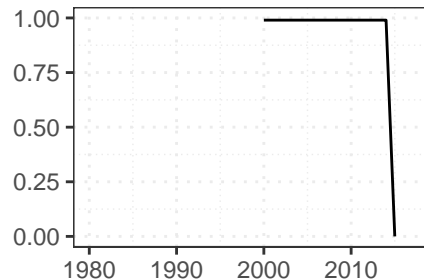

## Sex Unspecified

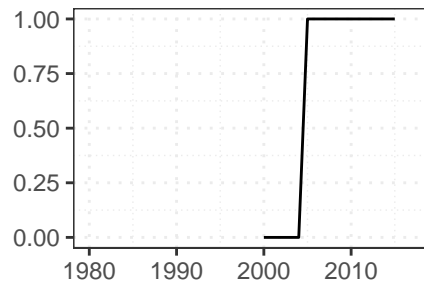

## Birth Order Unspecified

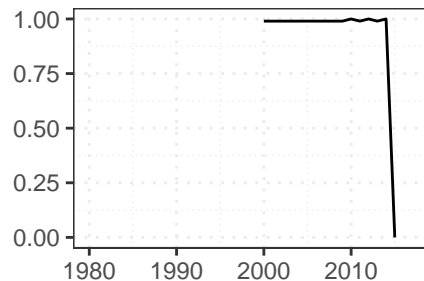

## Birth Weight Unspecified

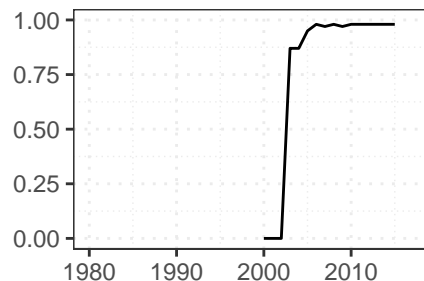



# Suriname

VSPI-B

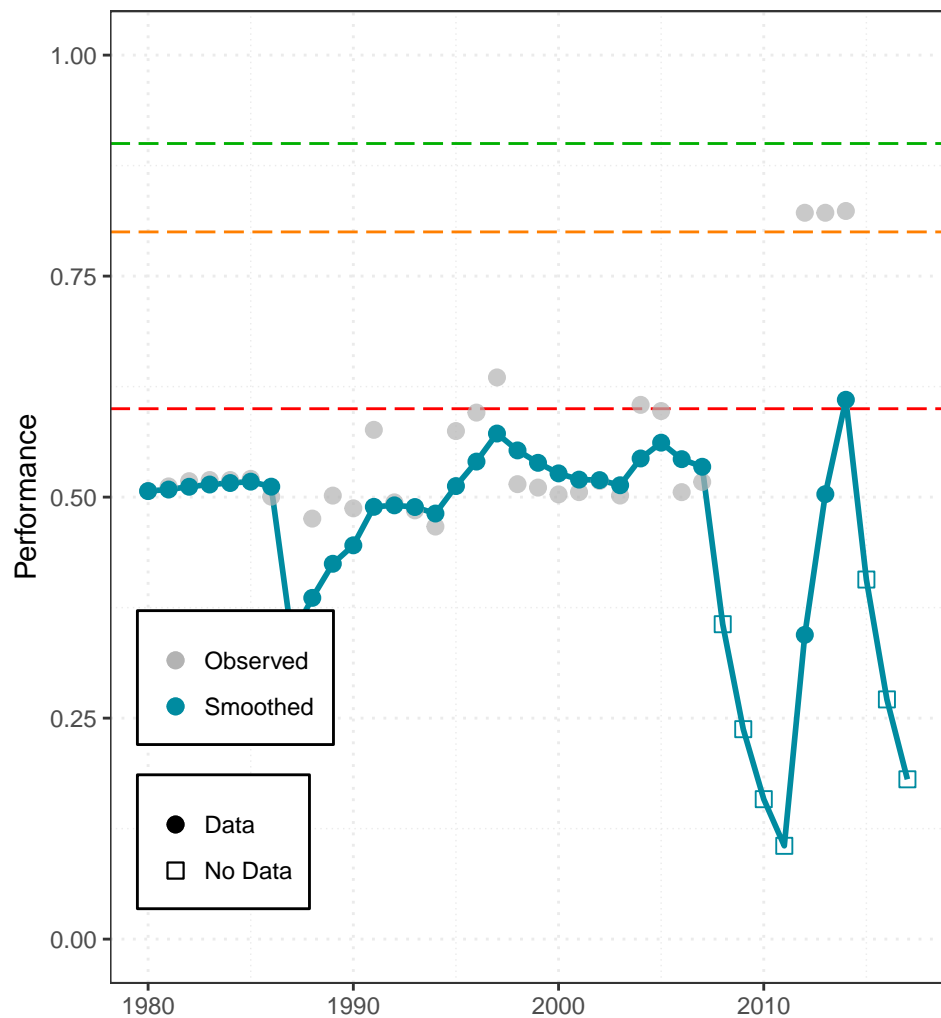

## Completeness

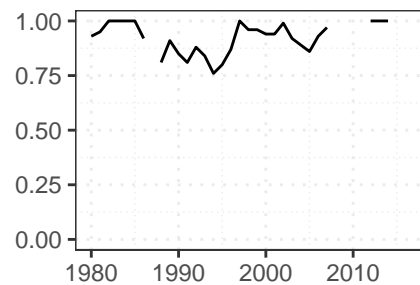

## Age Unspecified

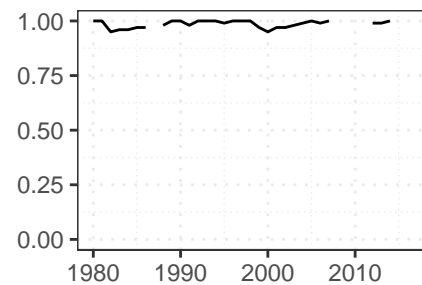

## Sex Unspecified

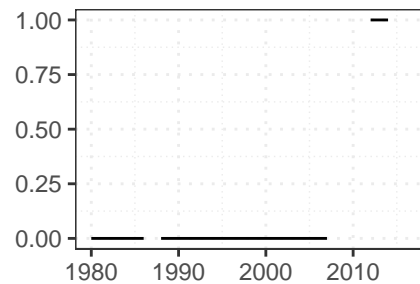

## Birth Order Unspecified

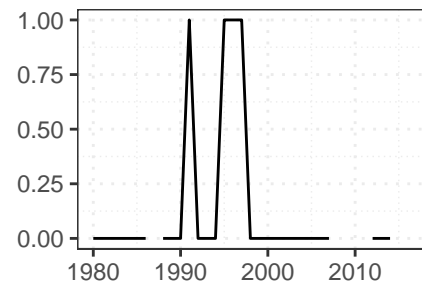

## Birth Weight Unspecified

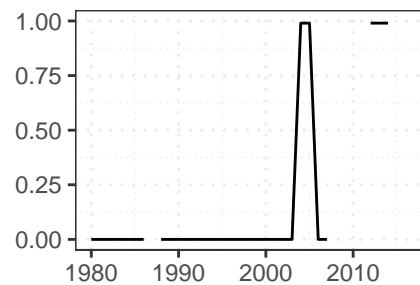

# Slovakia

VSPI-B

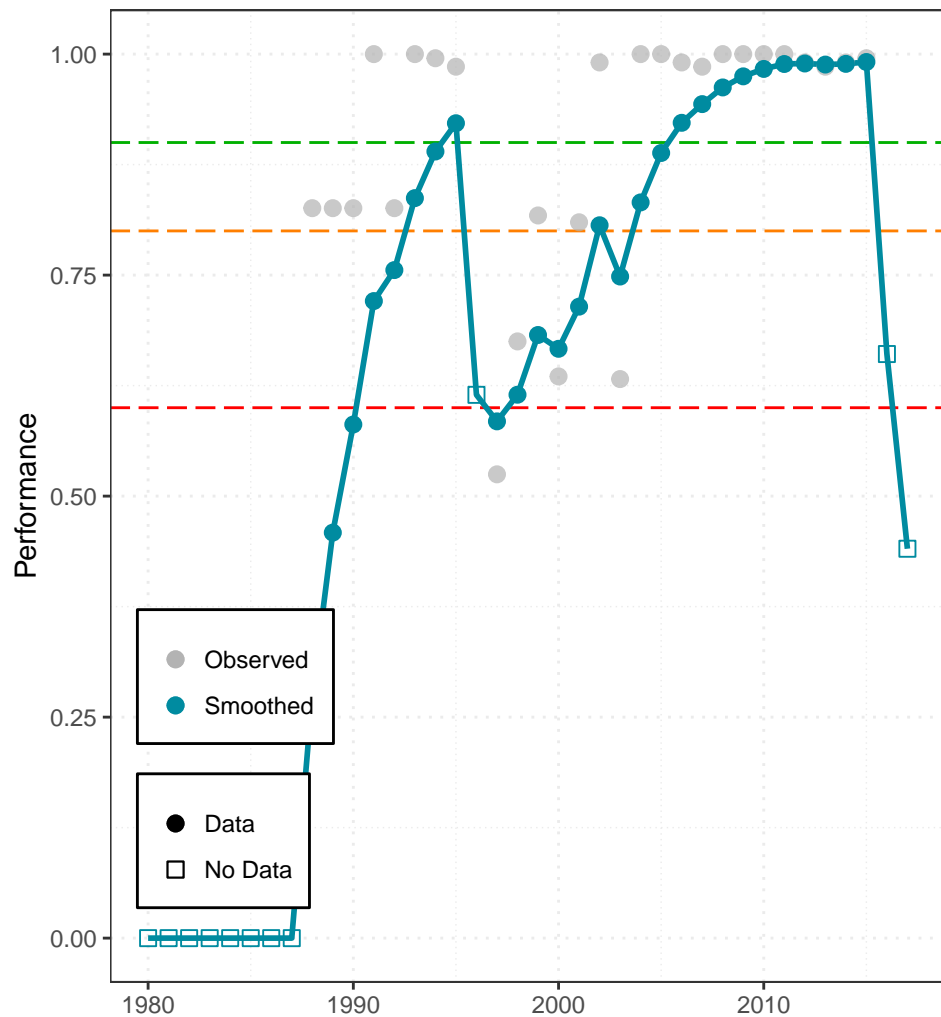

## Completeness

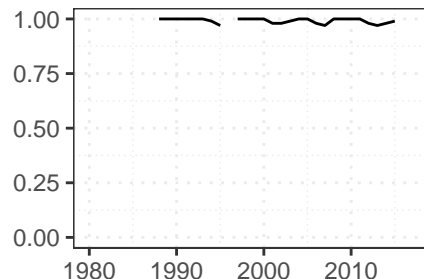

## Age Unspecified

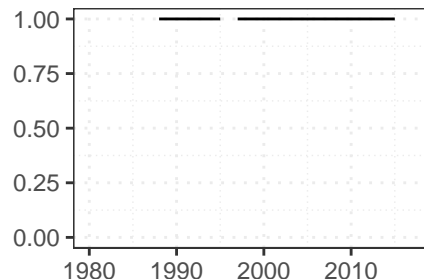

## Sex Unspecified

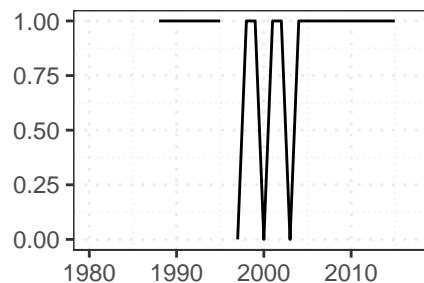

## Birth Order Unspecified

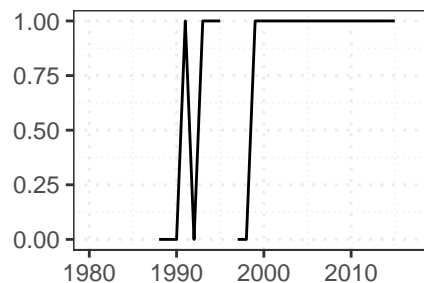

## Birth Weight Unspecified

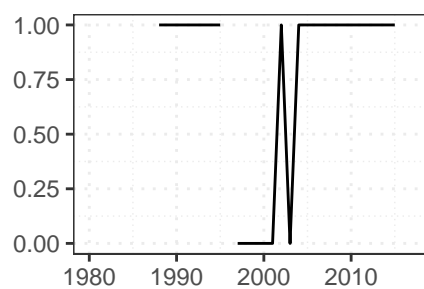

# Slovenia

VSPI-B

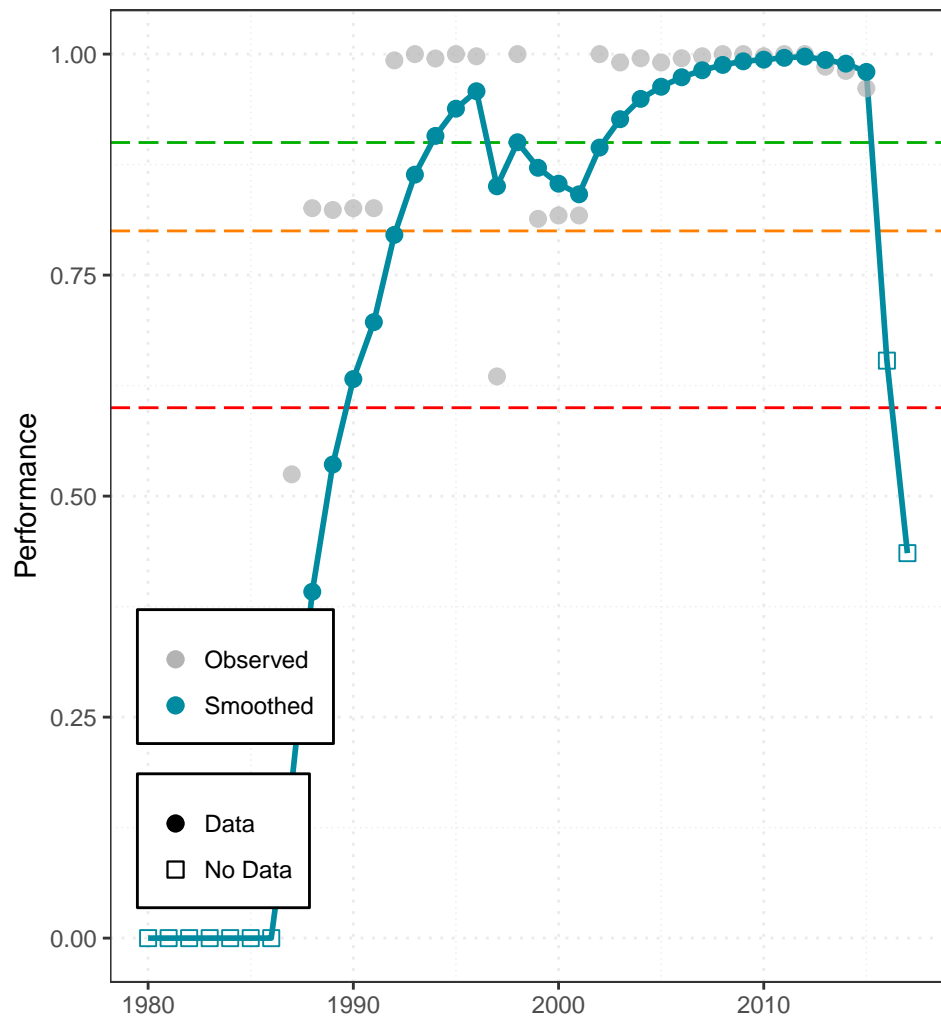

## Completeness

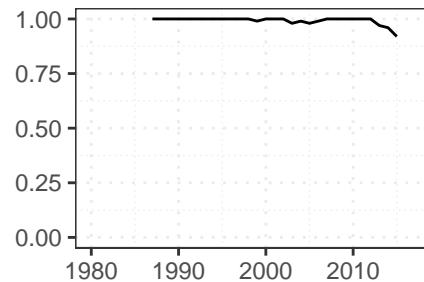

## Age Unspecified

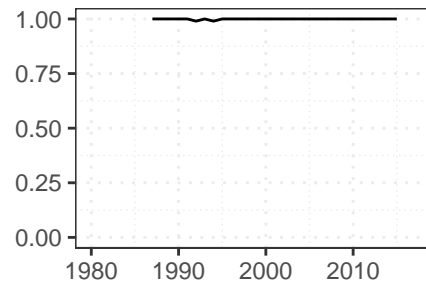

## Sex Unspecified

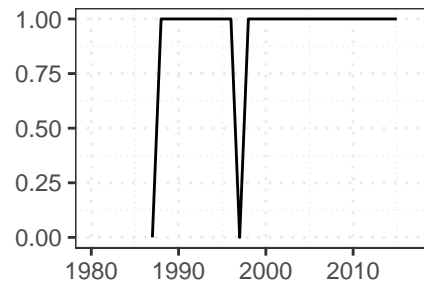

## Birth Order Unspecified

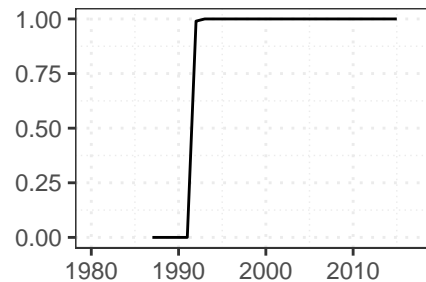

## Birth Weight Unspecified

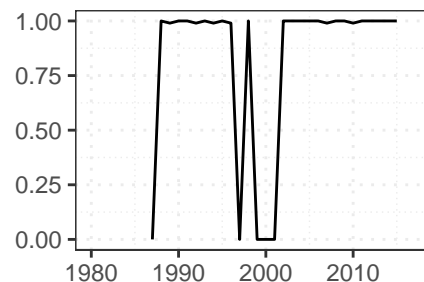

# Sweden

## VSPI-B

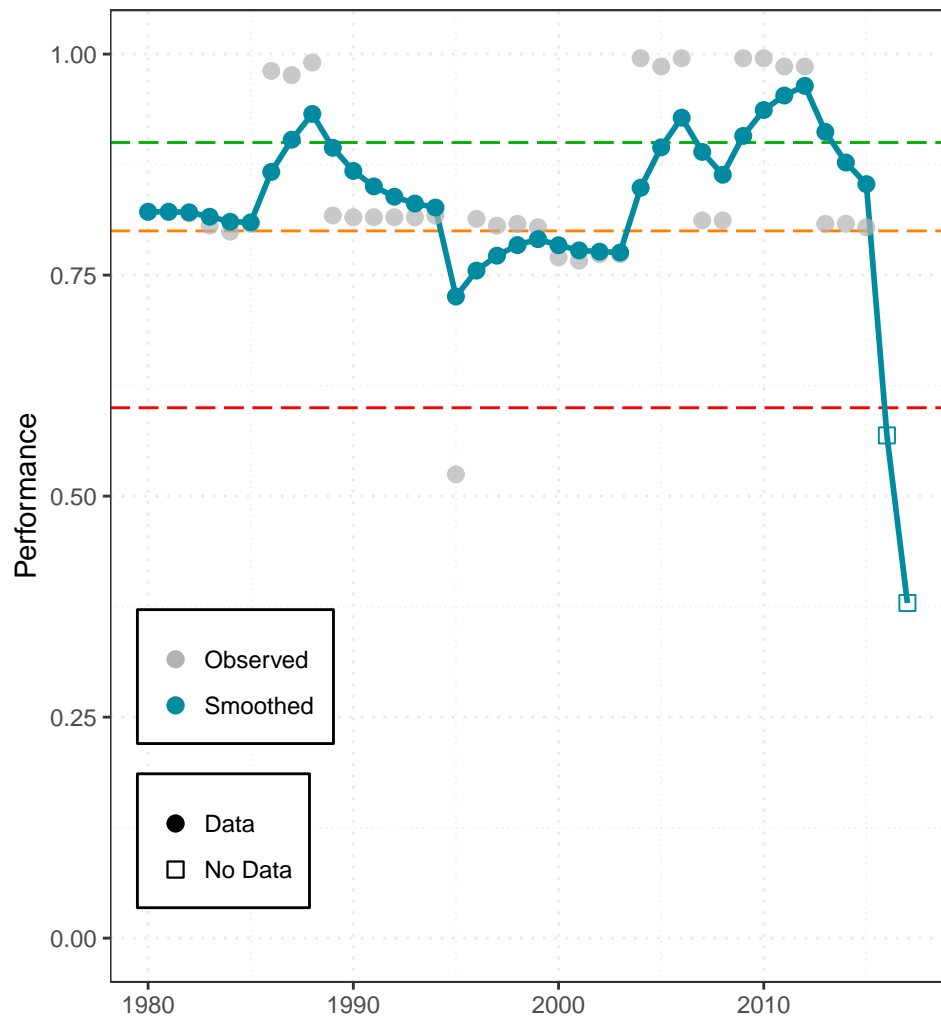

## Completeness

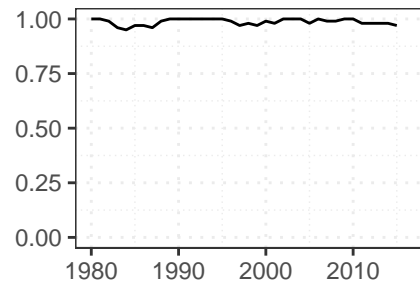

## Age Unspecified

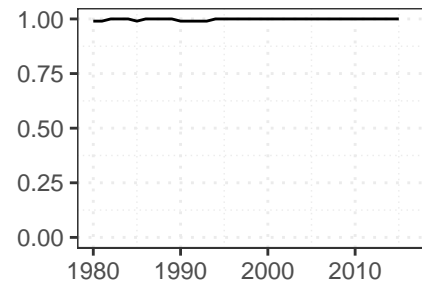

## Sex Unspecified

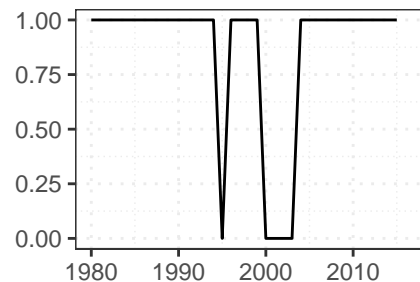

## Birth Order Unspecified

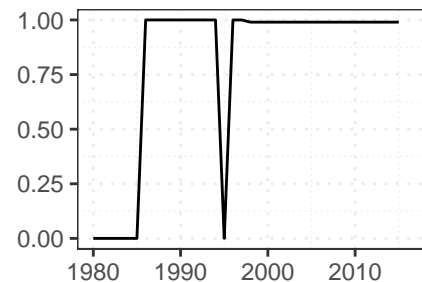

## Birth Weight Unspecified

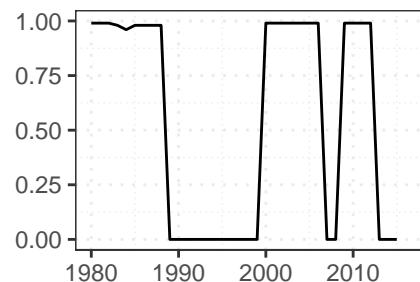

# Seychelles

VSPI-B

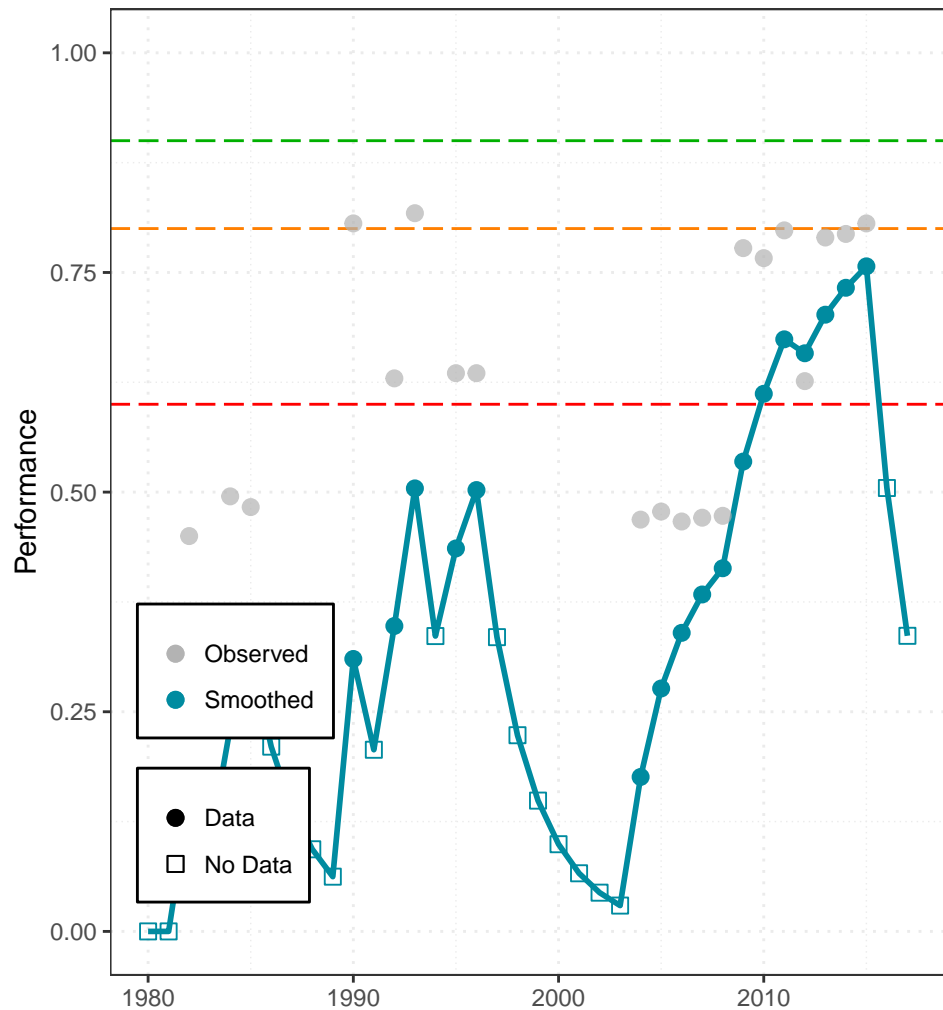

## Completeness

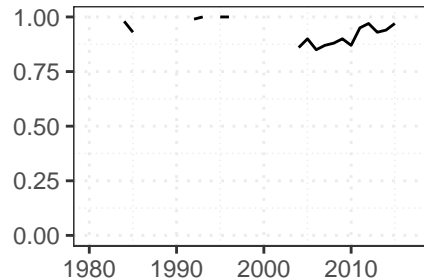

## Age Unspecified

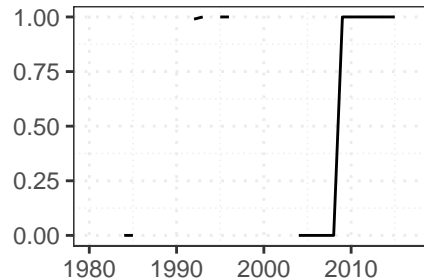

## Sex Unspecified

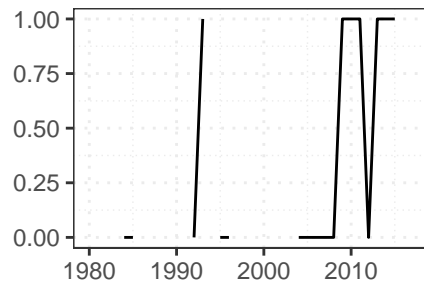

## Birth Order Unspecified

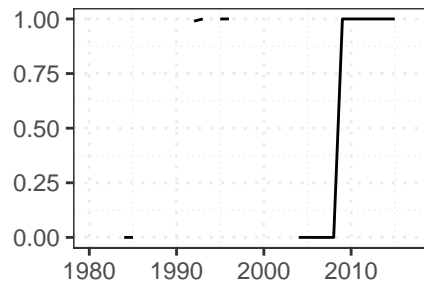

## Birth Weight Unspecified

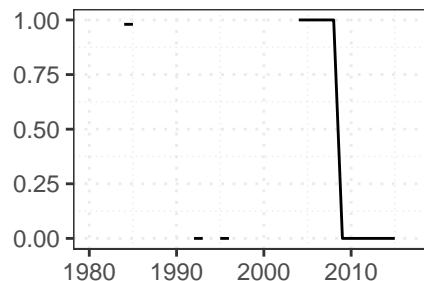

# Thailand

## VSPI-B

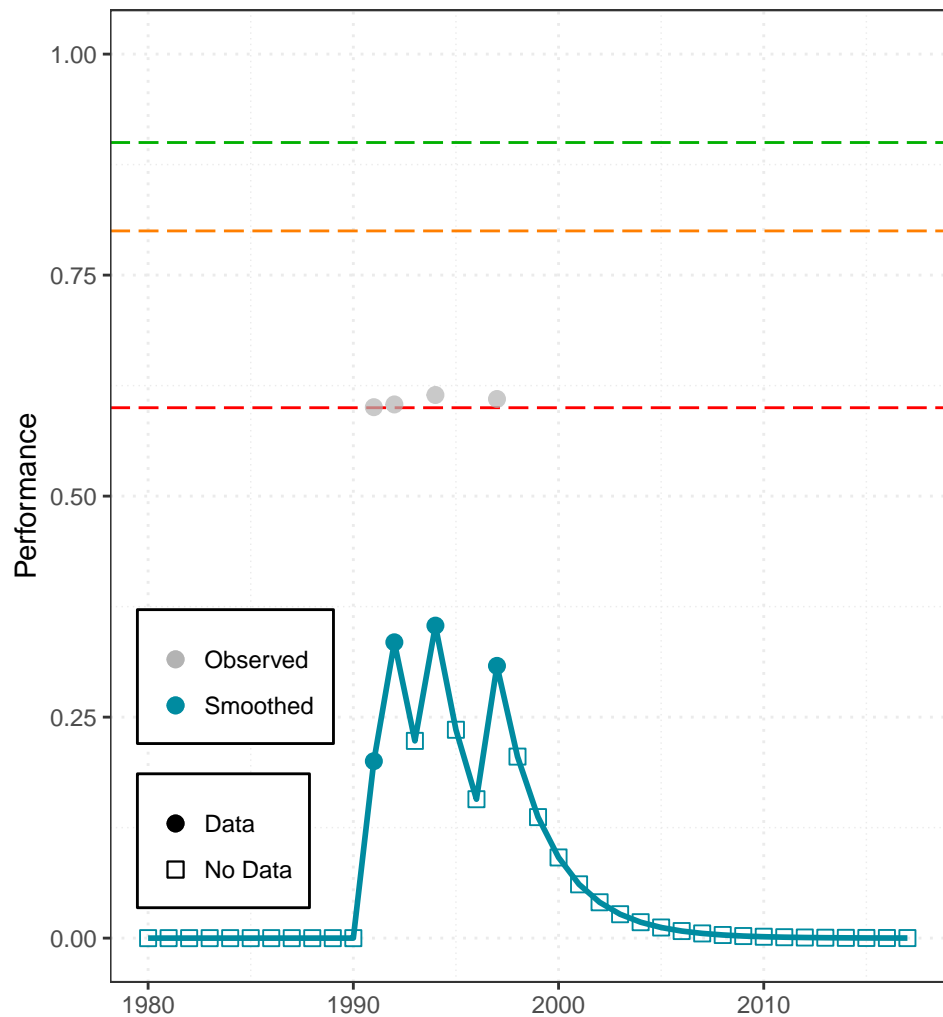

## Completeness

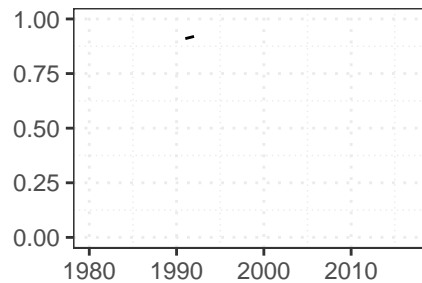

## Age Unspecified

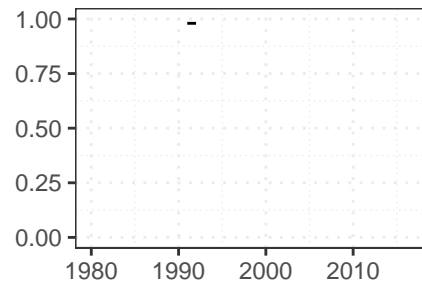

## Sex Unspecified

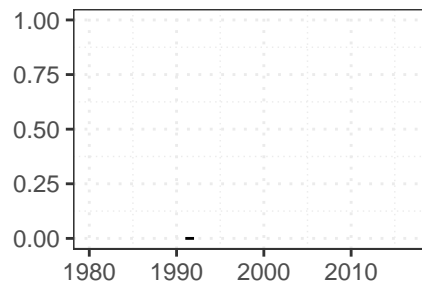

## Birth Order Unspecified

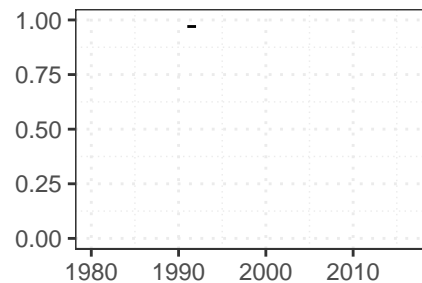

## Birth Weight Unspecified

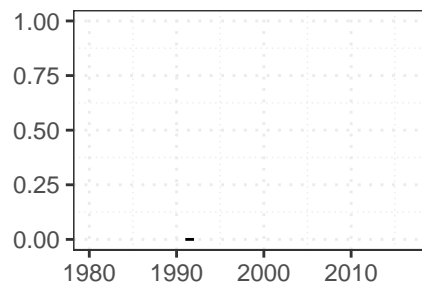

# Tajikistan

VSPI-B

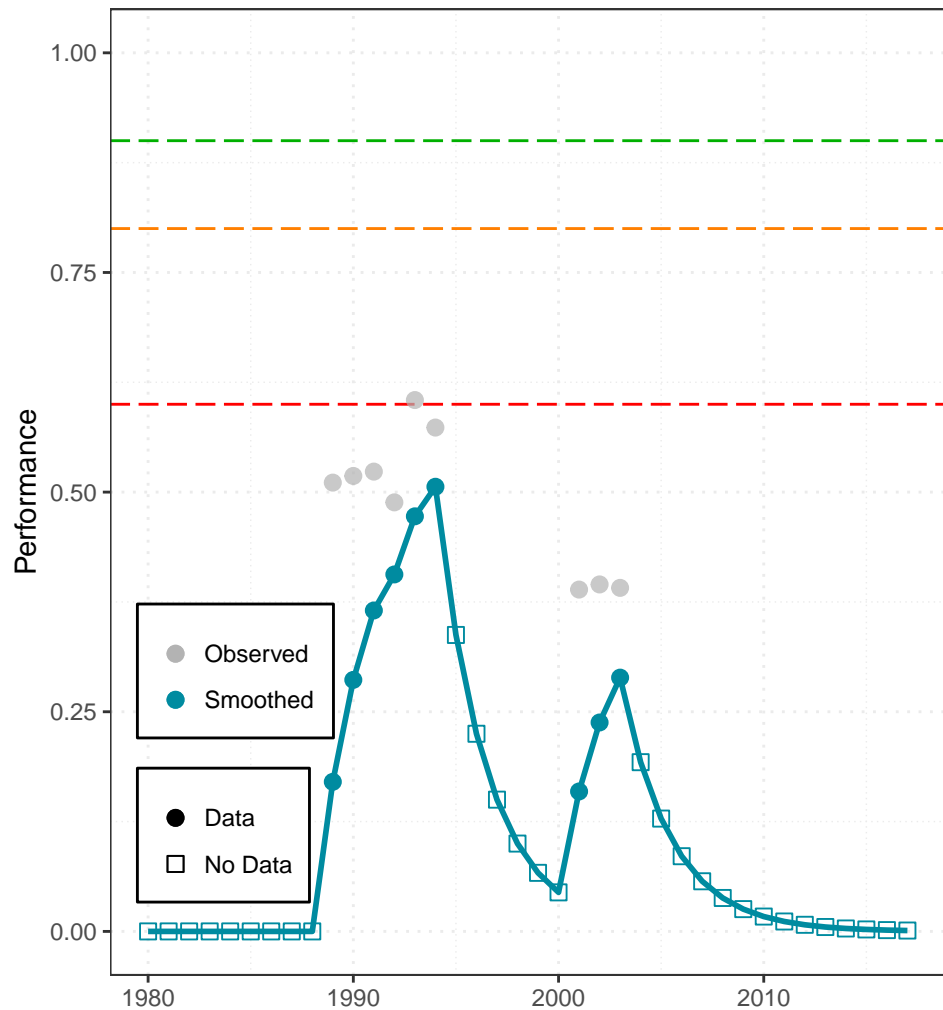

## Completeness

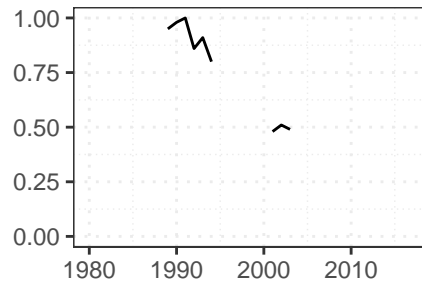

## Age Unspecified

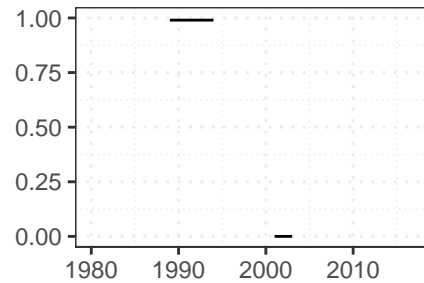

## Sex Unspecified

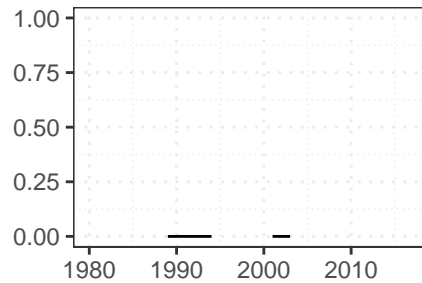

## Birth Order Unspecified

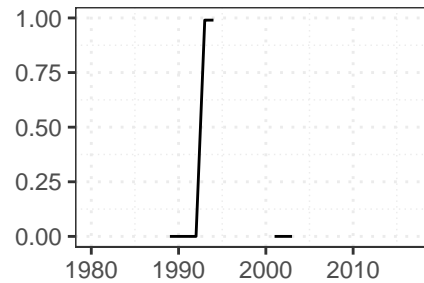

## Birth Weight Unspecified

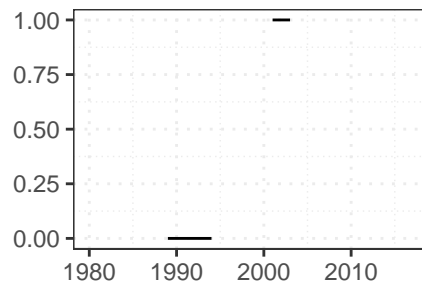

# Turkmenistan

VSPI-B

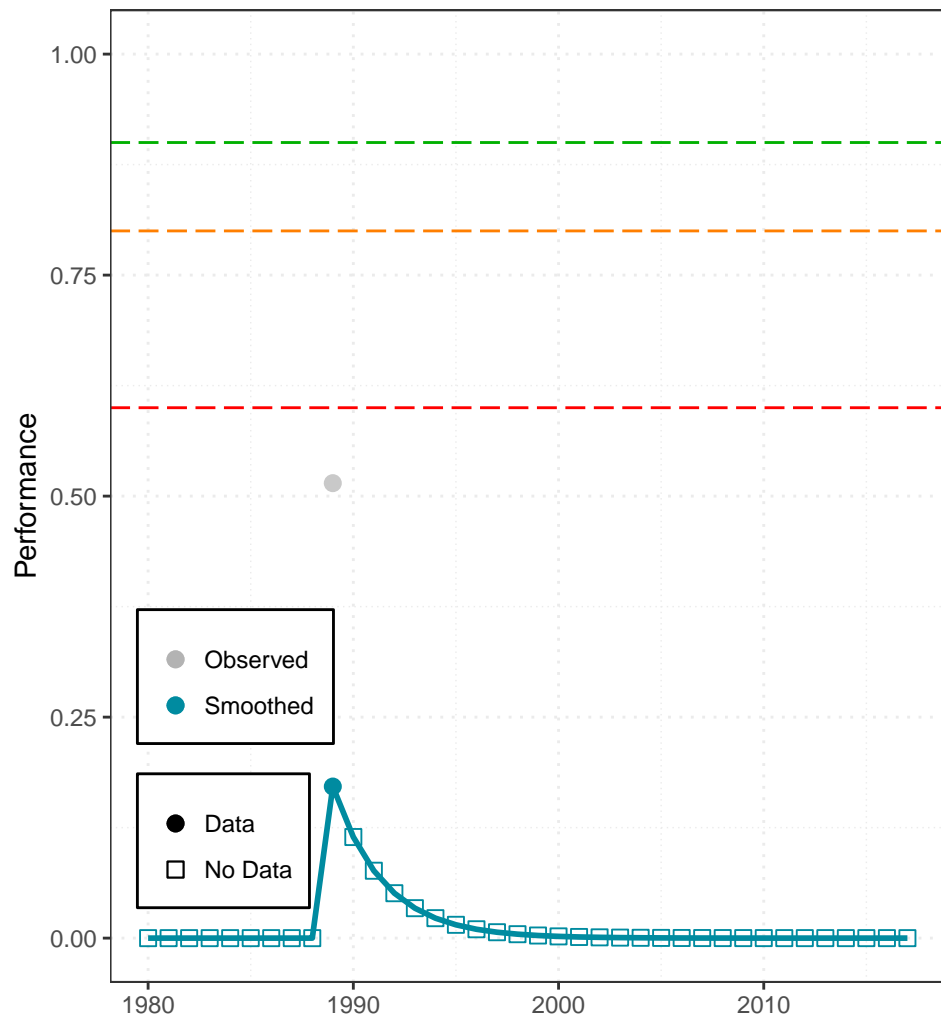

## Completeness

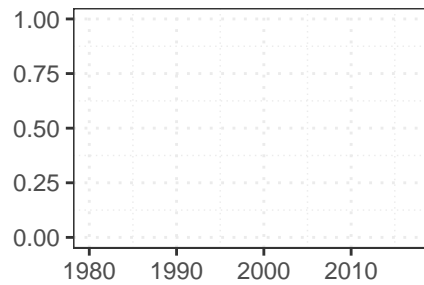

## Age Unspecified

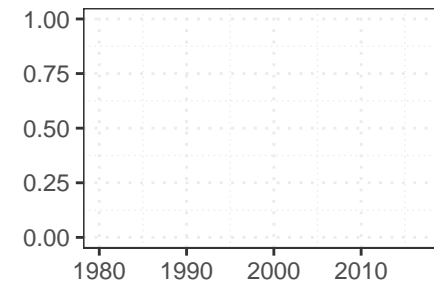

## Sex Unspecified

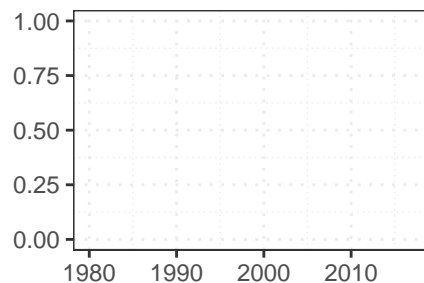

## Birth Order Unspecified

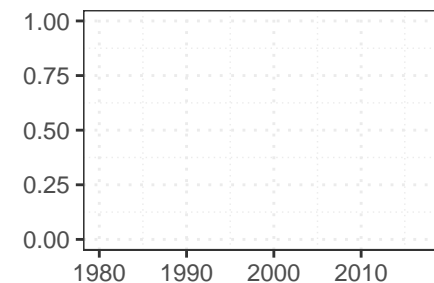

## Birth Weight Unspecified

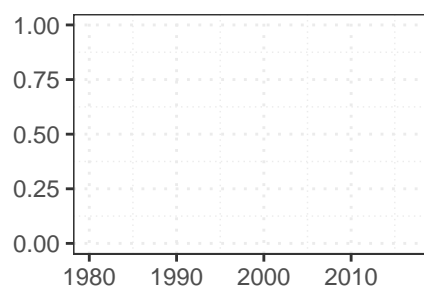



# Tonga

## VSPI-B

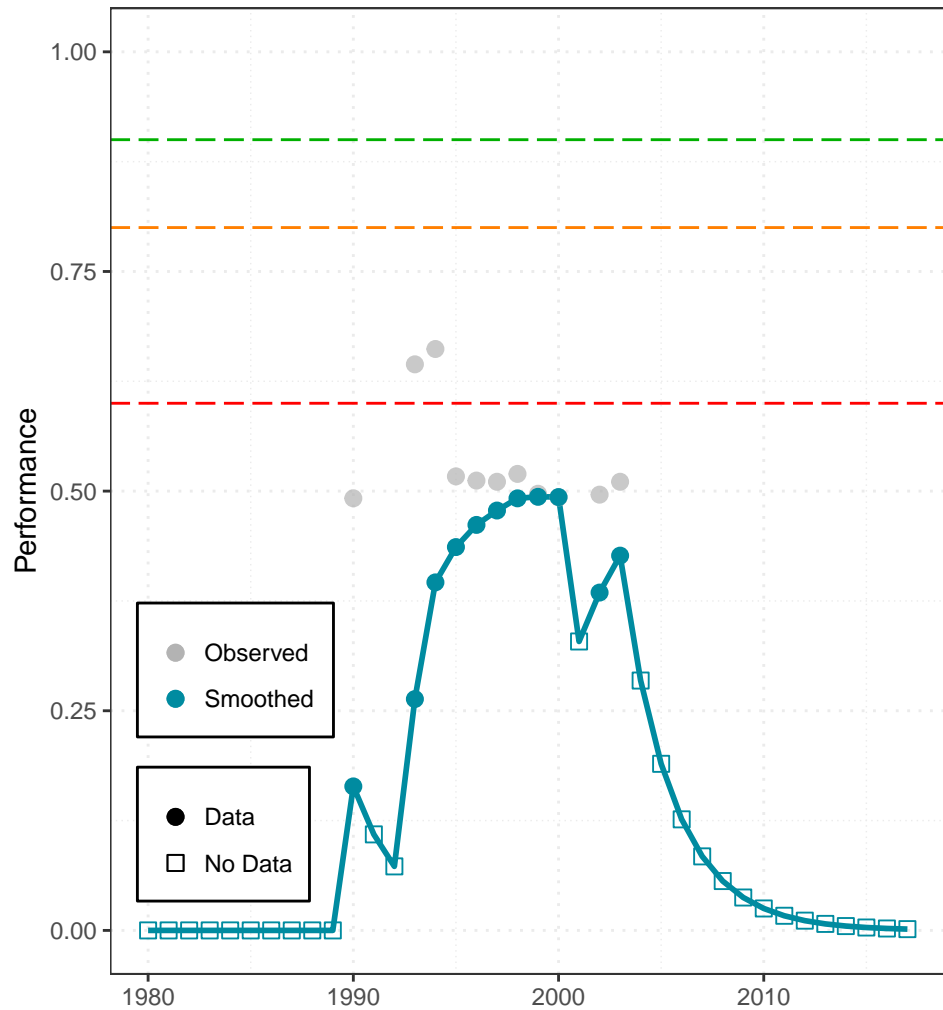

## Completeness

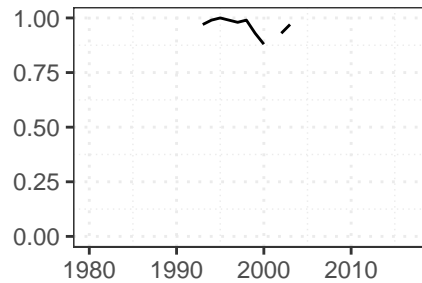

## Age Unspecified

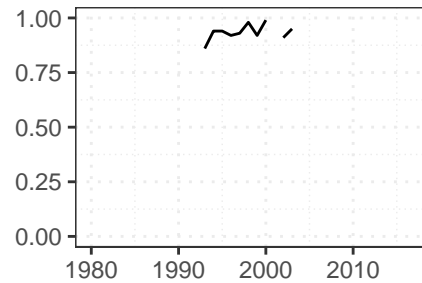

## Sex Unspecified

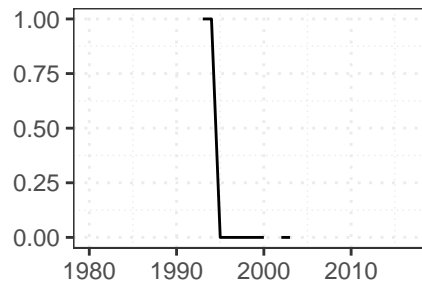

## Birth Order Unspecified

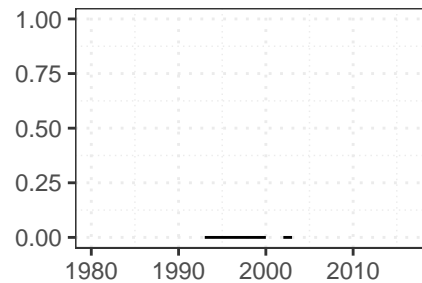

## Birth Weight Unspecified

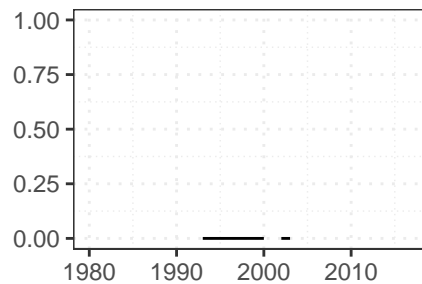

# Trinidad and Tobago

## VSPI-B

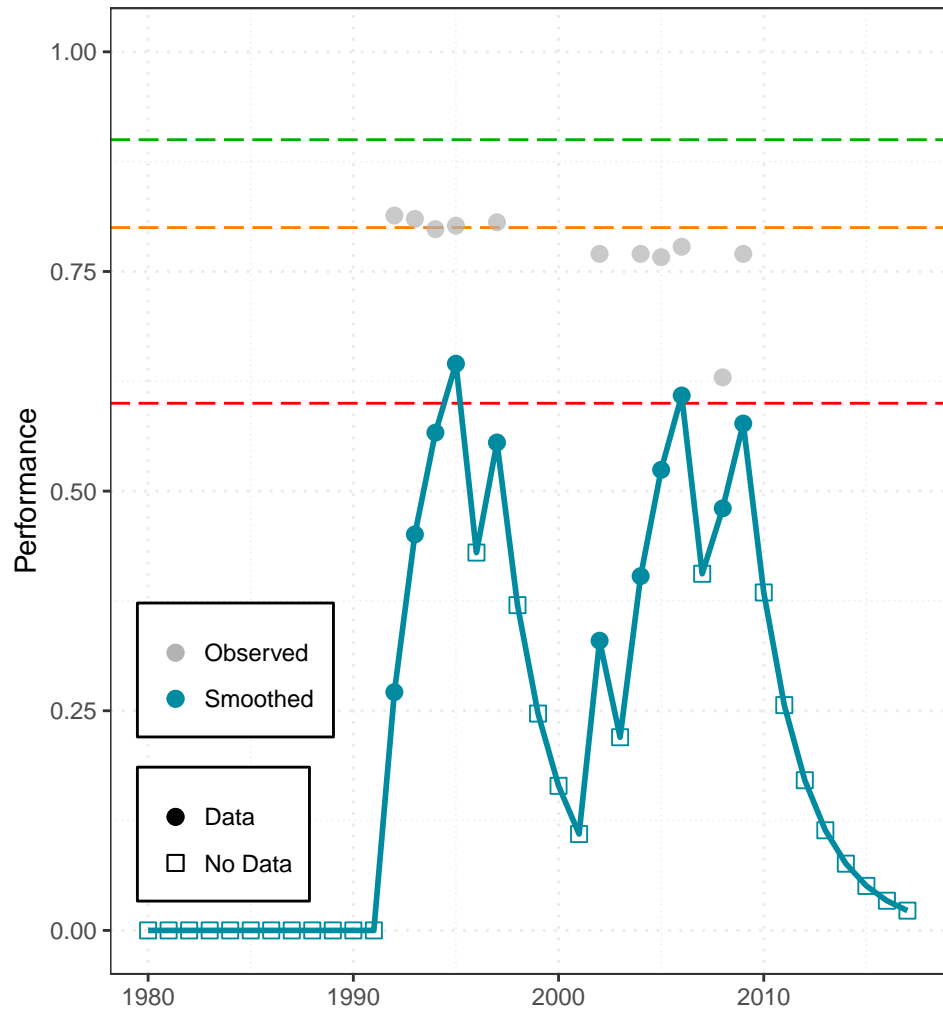

## Completeness

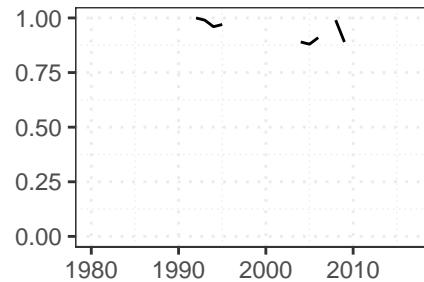

## Age Unspecified

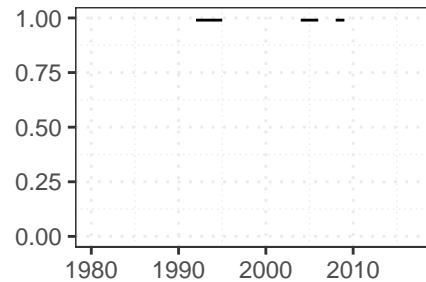

## Sex Unspecified

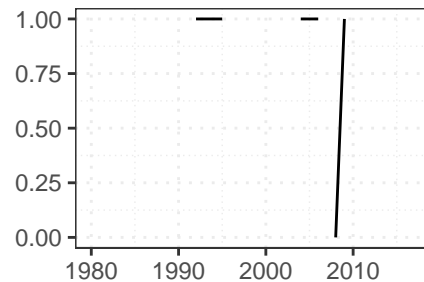

## Birth Order Unspecified

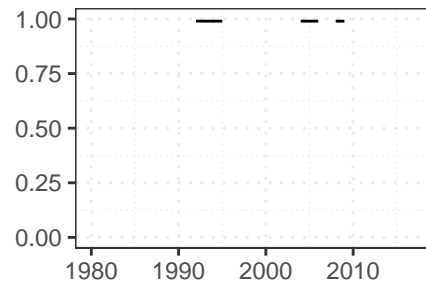

## Birth Weight Unspecified

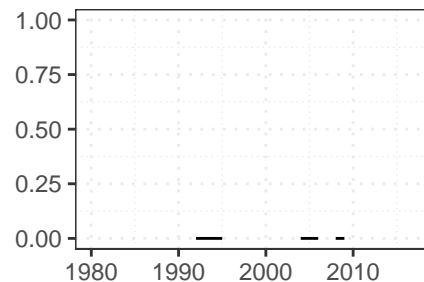

# Tunisia

## VSPI-B

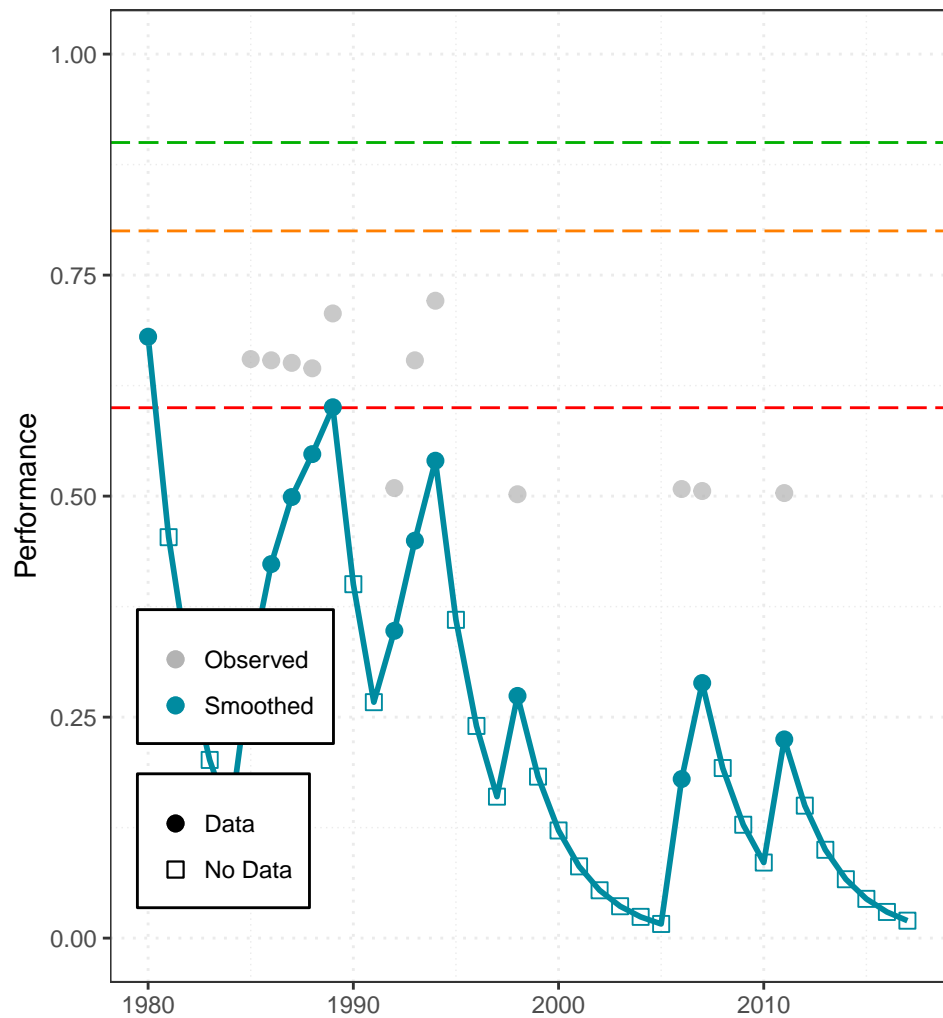

## Completeness

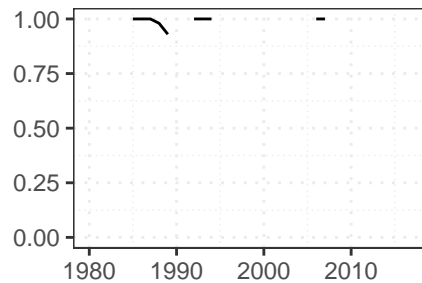

## Age Unspecified

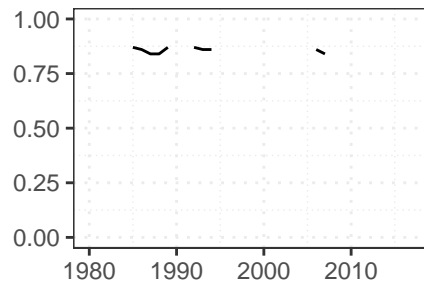

## Sex Unspecified

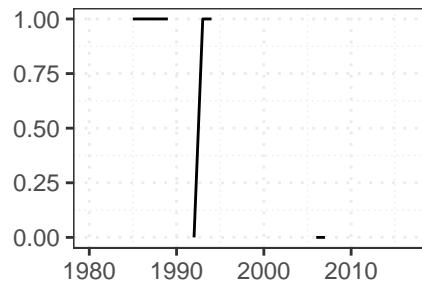

## Birth Order Unspecified

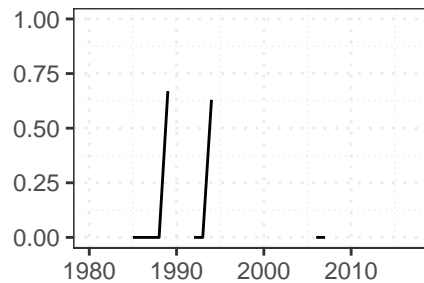

## Birth Weight Unspecified

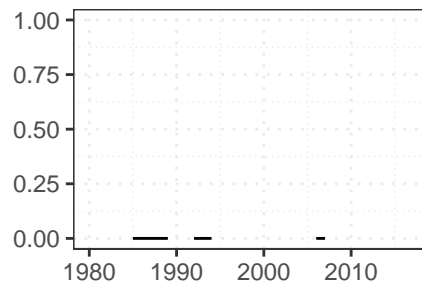

# Turkey

VSPI-B

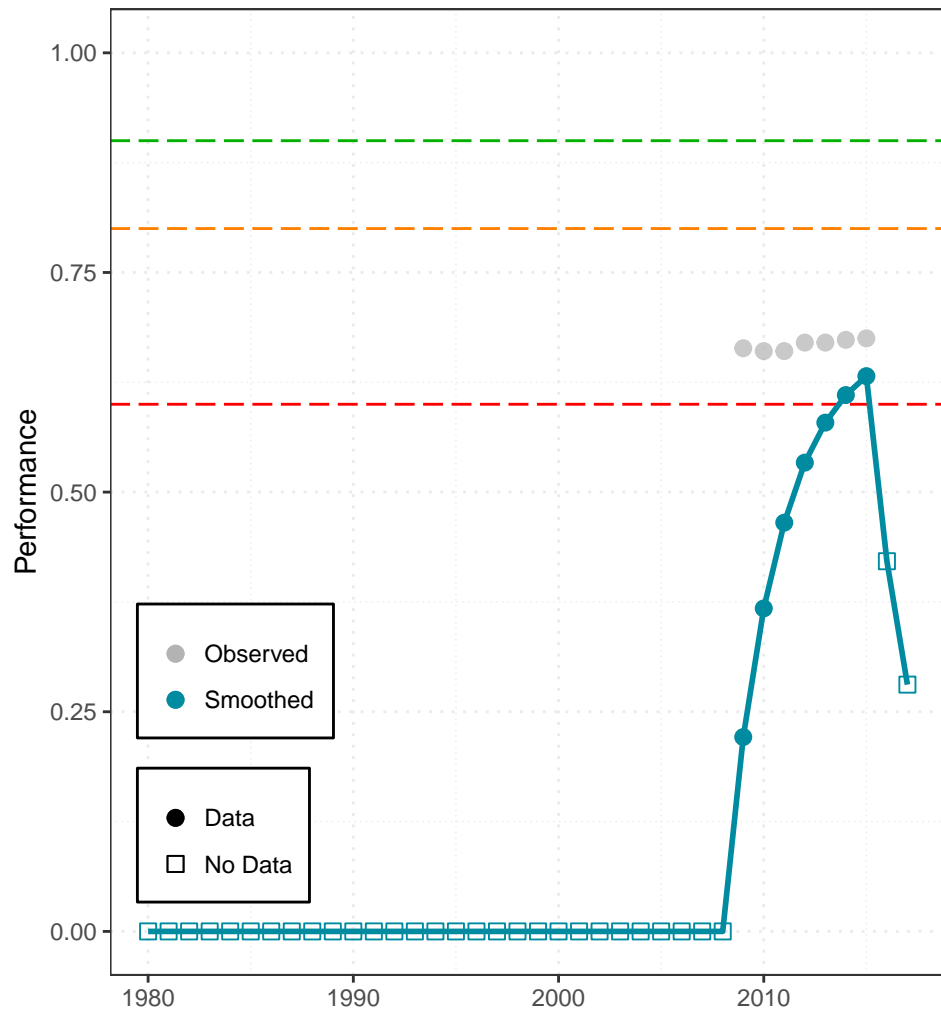

## Completeness

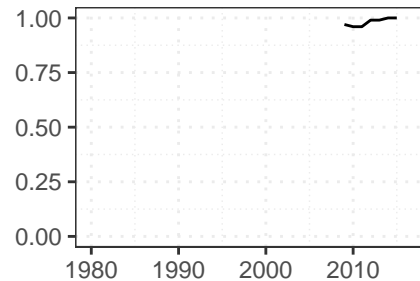

## Age Unspecified

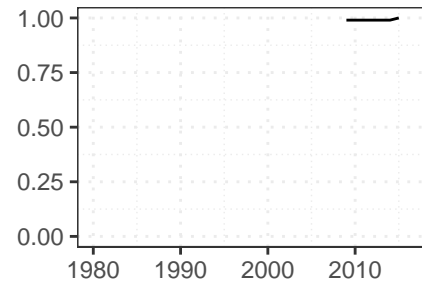

## Sex Unspecified

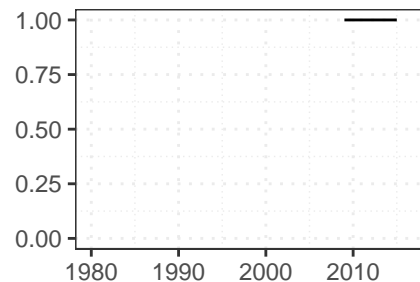

## Birth Order Unspecified

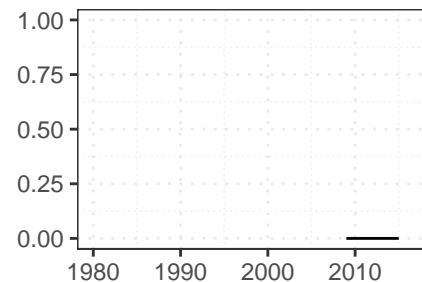

## Birth Weight Unspecified

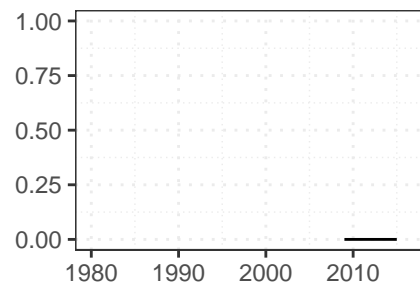

# Taiwan VSPI-B

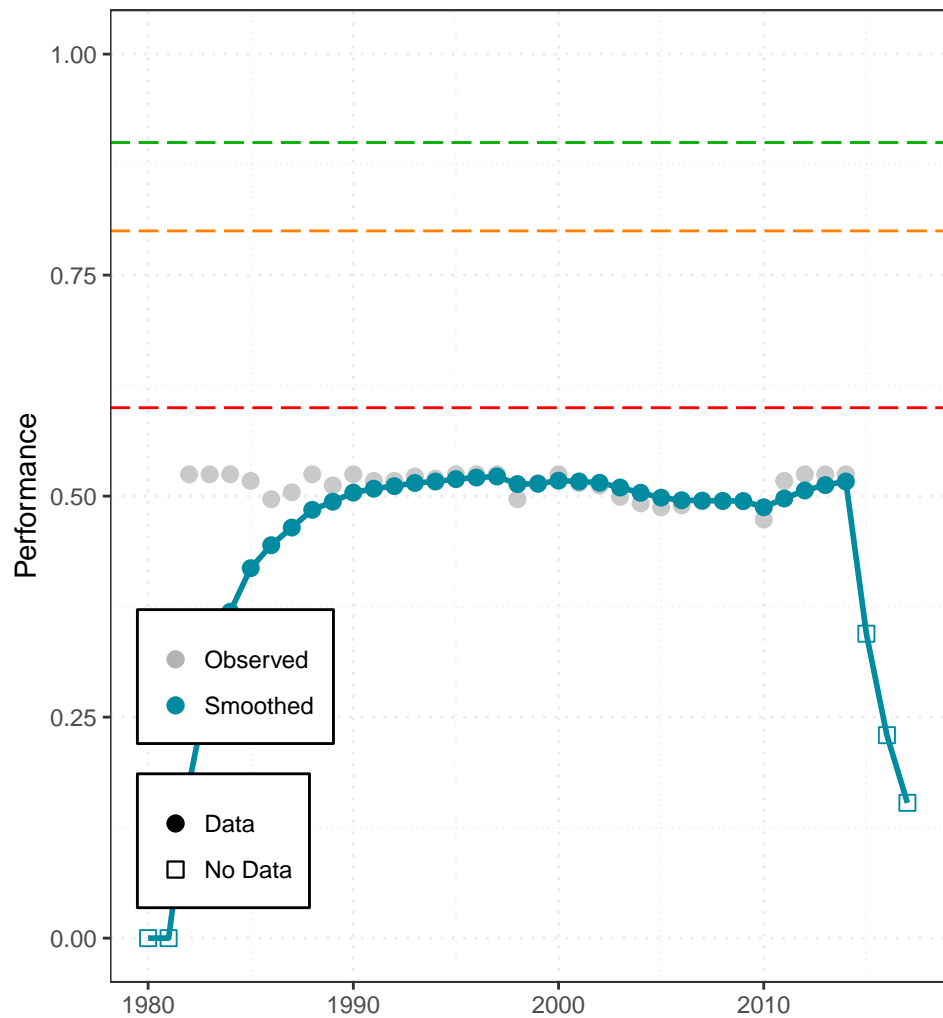

## Completeness

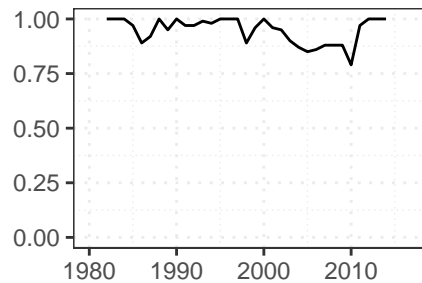

## Age Unspecified

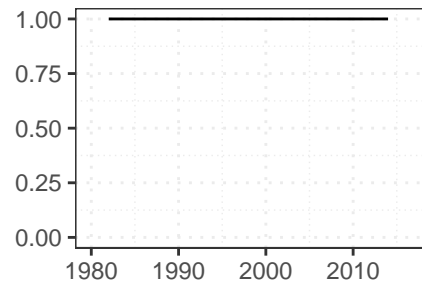

## Sex Unspecified

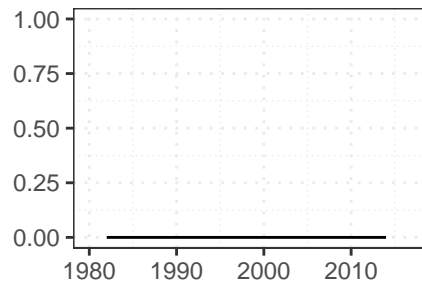

## Birth Order Unspecified

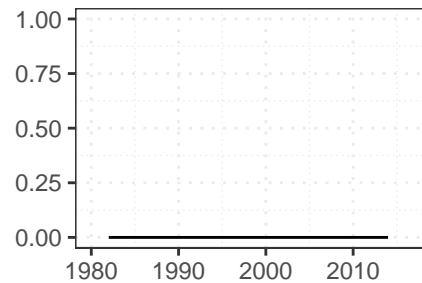

## Birth Weight Unspecified

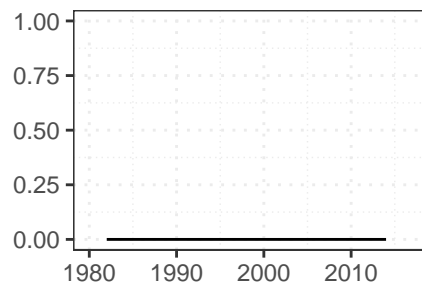

# Ukraine VSPI-B

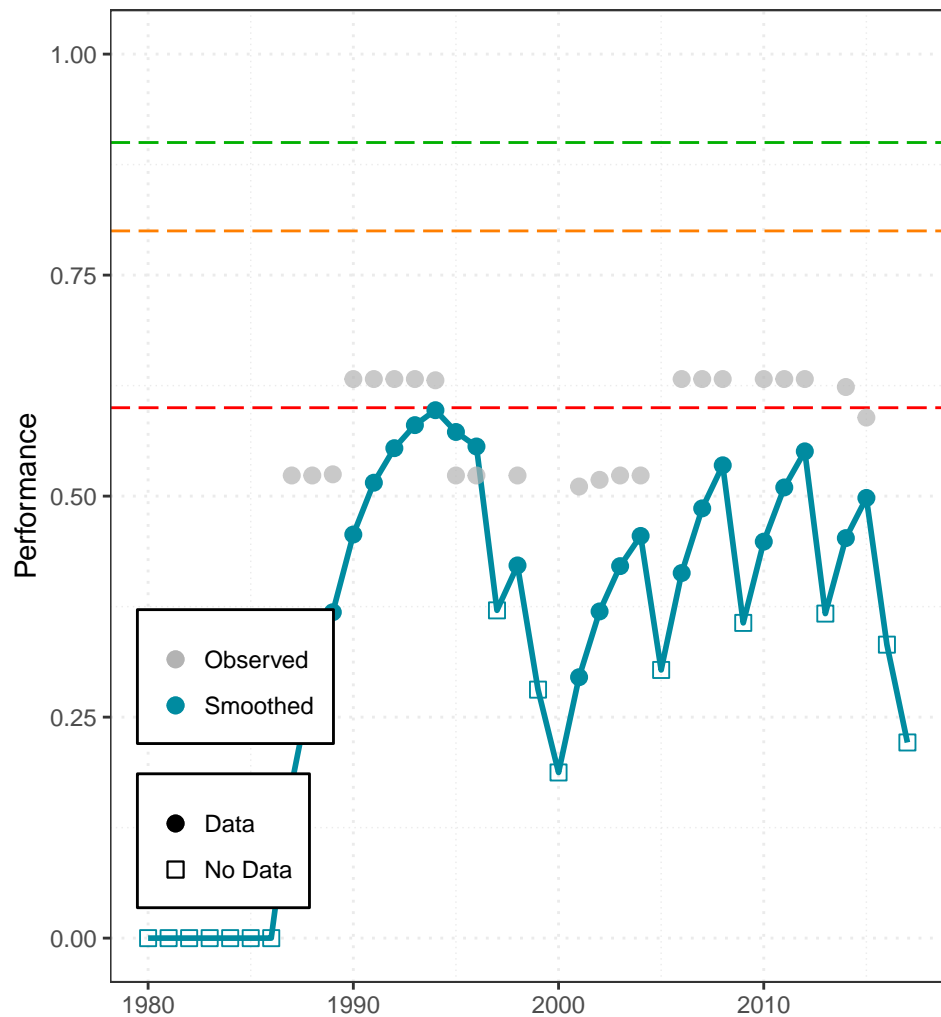

## Completeness

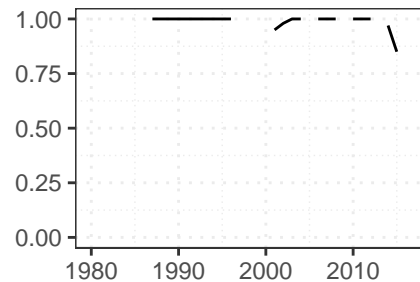

## Age Unspecified

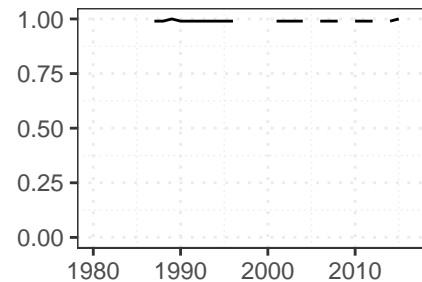

## Sex Unspecified

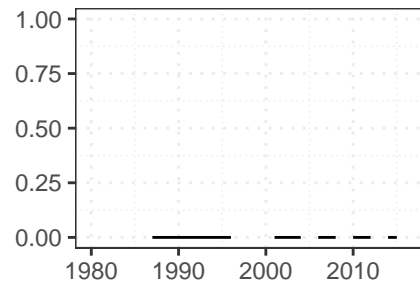

## Birth Order Unspecified

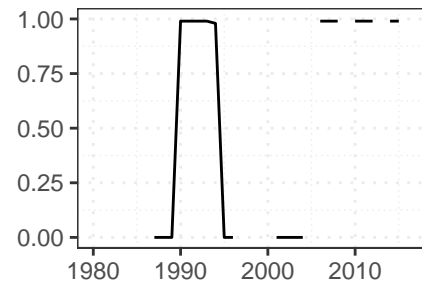

## Birth Weight Unspecified

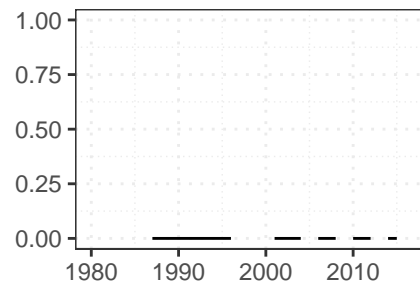

# Uruguay

VSPI-B

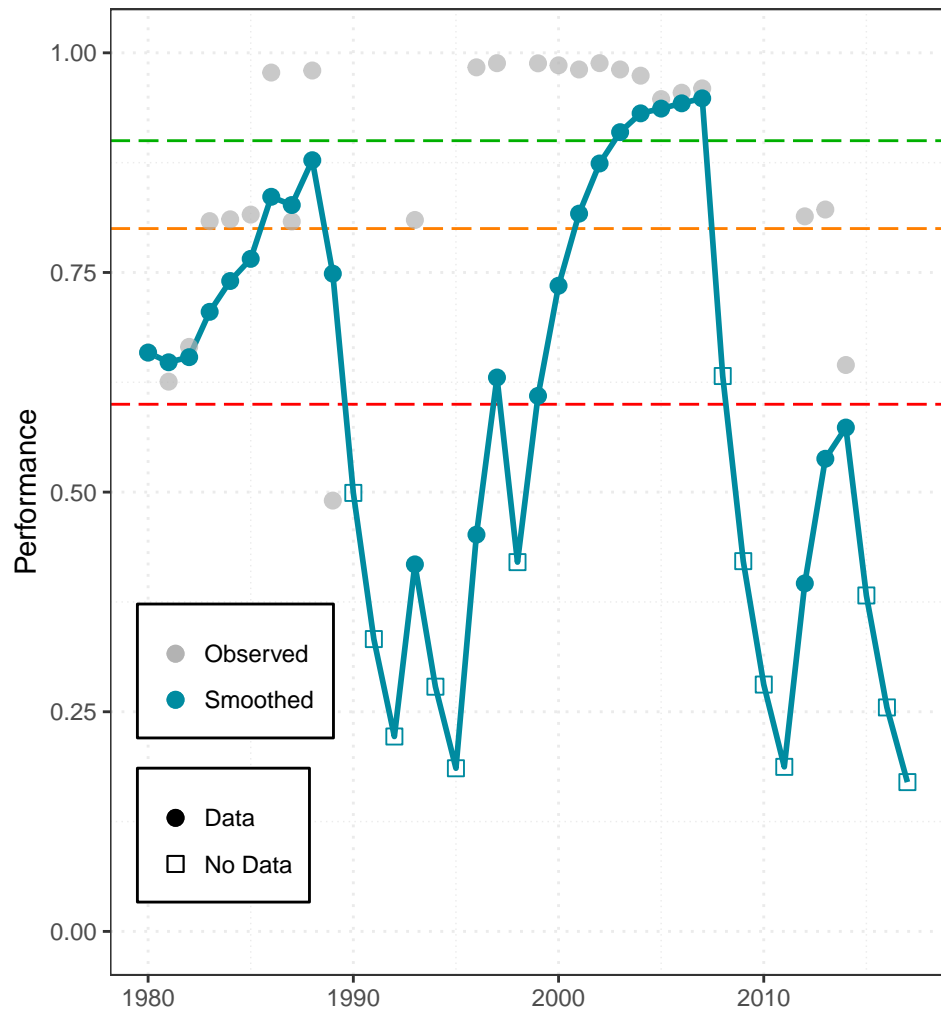

## Completeness

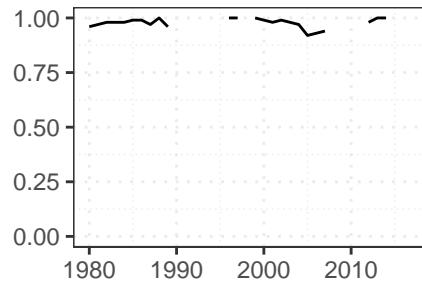

## Age Unspecified

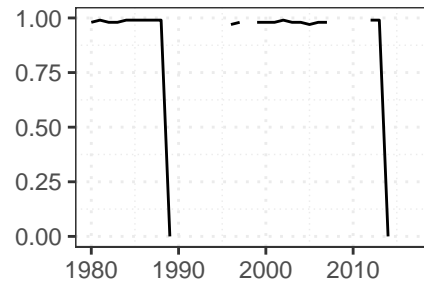

## Sex Unspecified

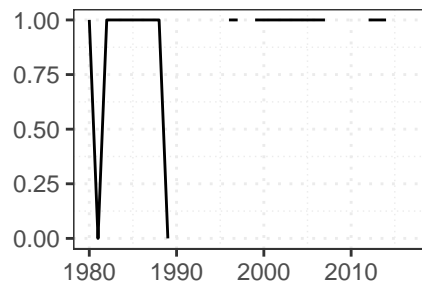

## Birth Order Unspecified

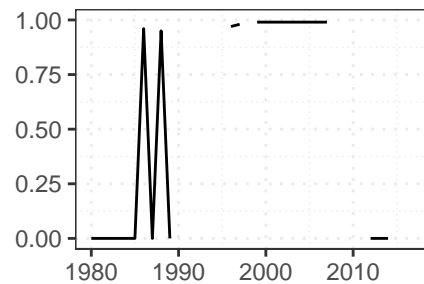

## Birth Weight Unspecified

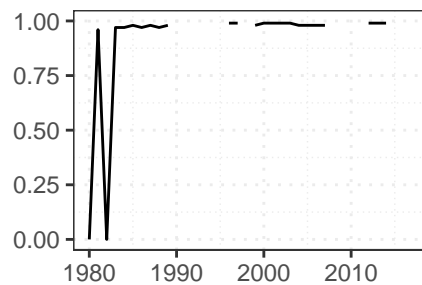

# United States

VSPI-B

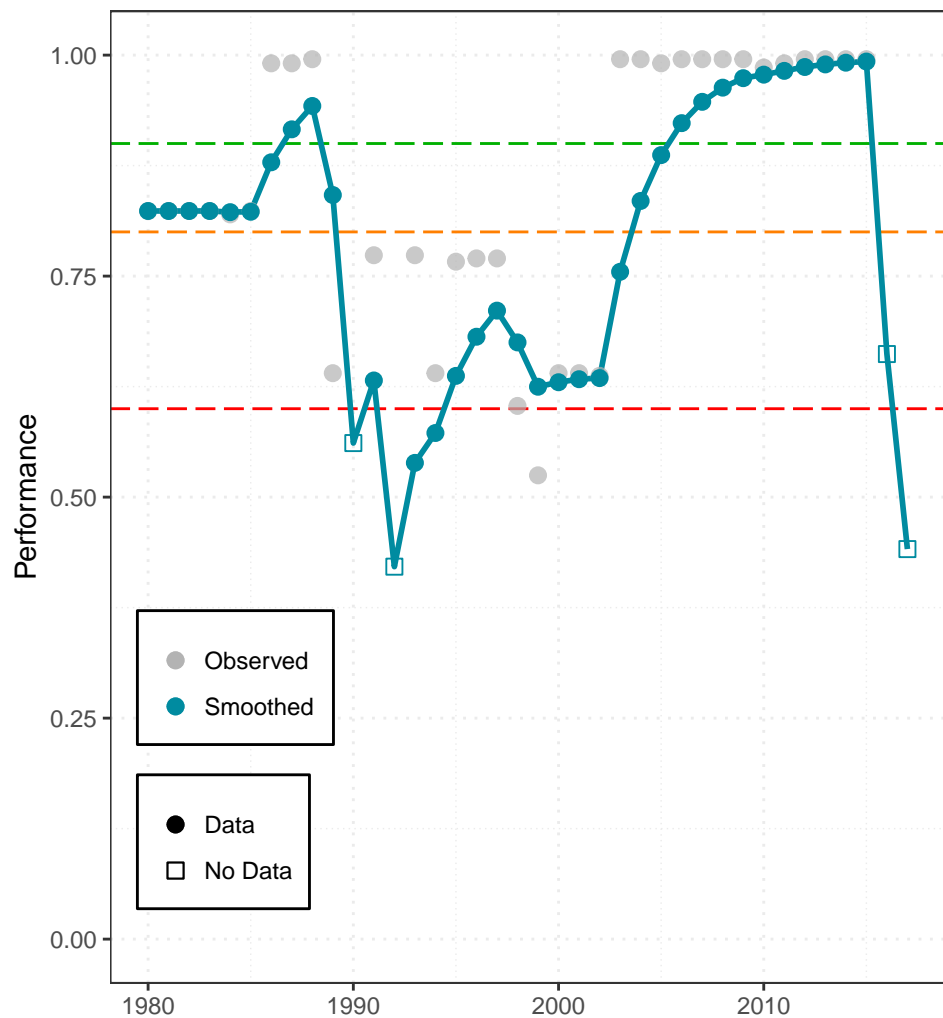

## Completeness

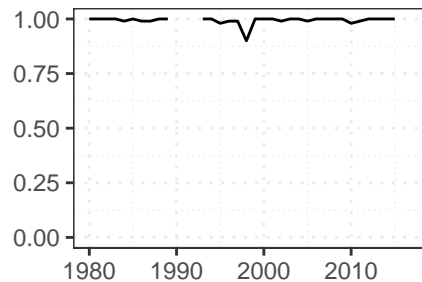

## Age Unspecified

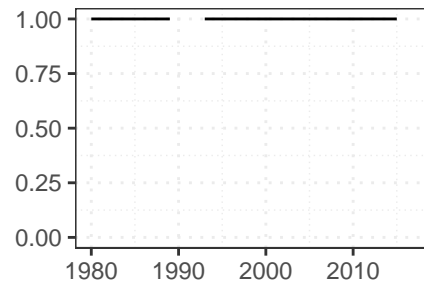

## Sex Unspecified

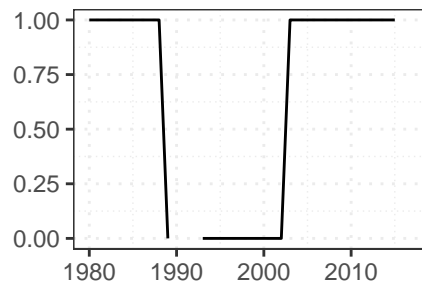

## Birth Order Unspecified

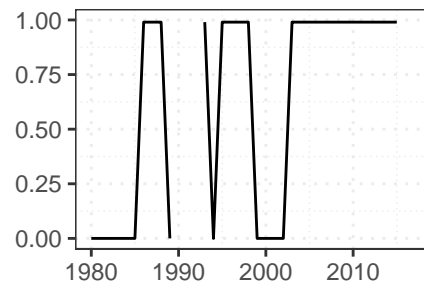

## Birth Weight Unspecified

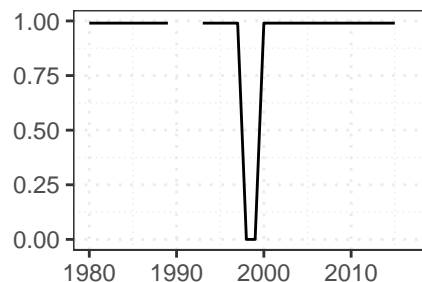



# Uzbekistan

VSPI-B

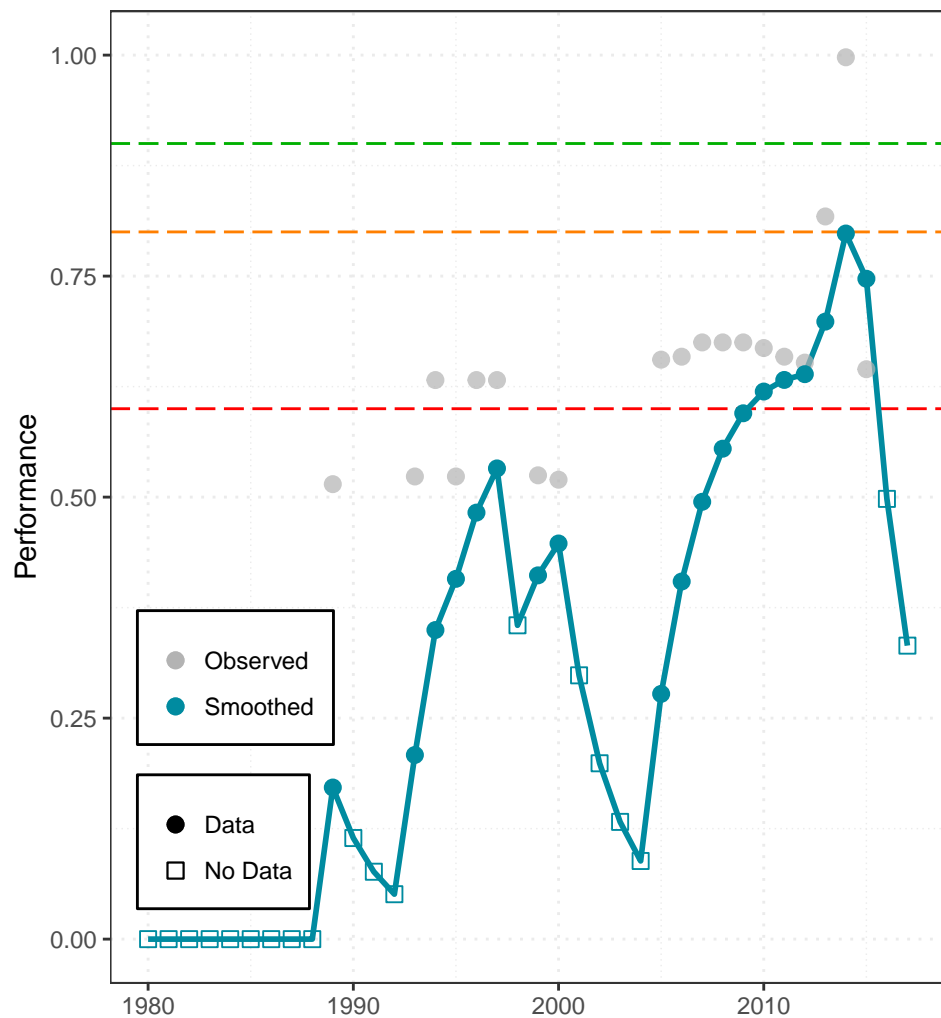

## Completeness

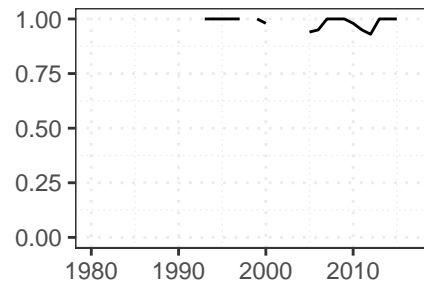

## Age Unspecified

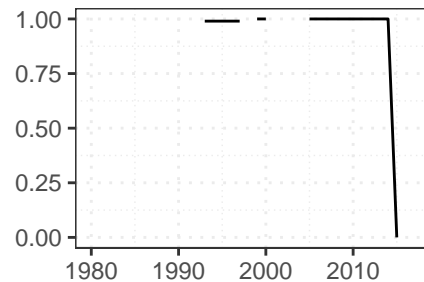

## Sex Unspecified

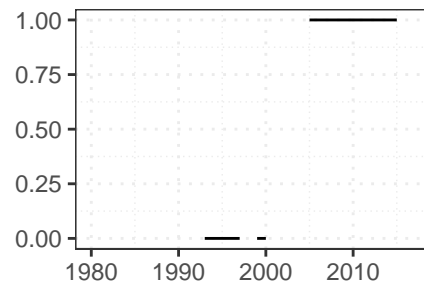

## Birth Order Unspecified

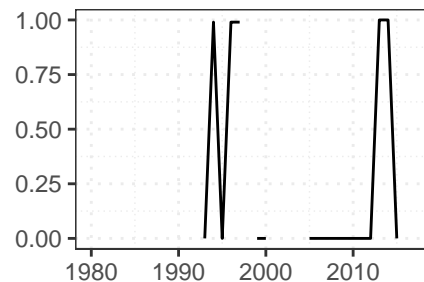

## Birth Weight Unspecified

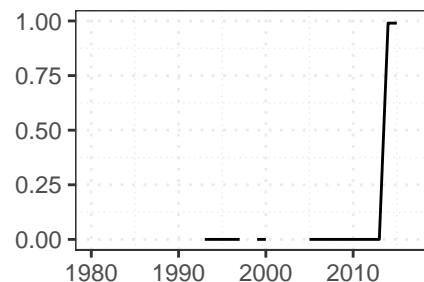

# Saint Vincent and the Grenadines

VSPI-B

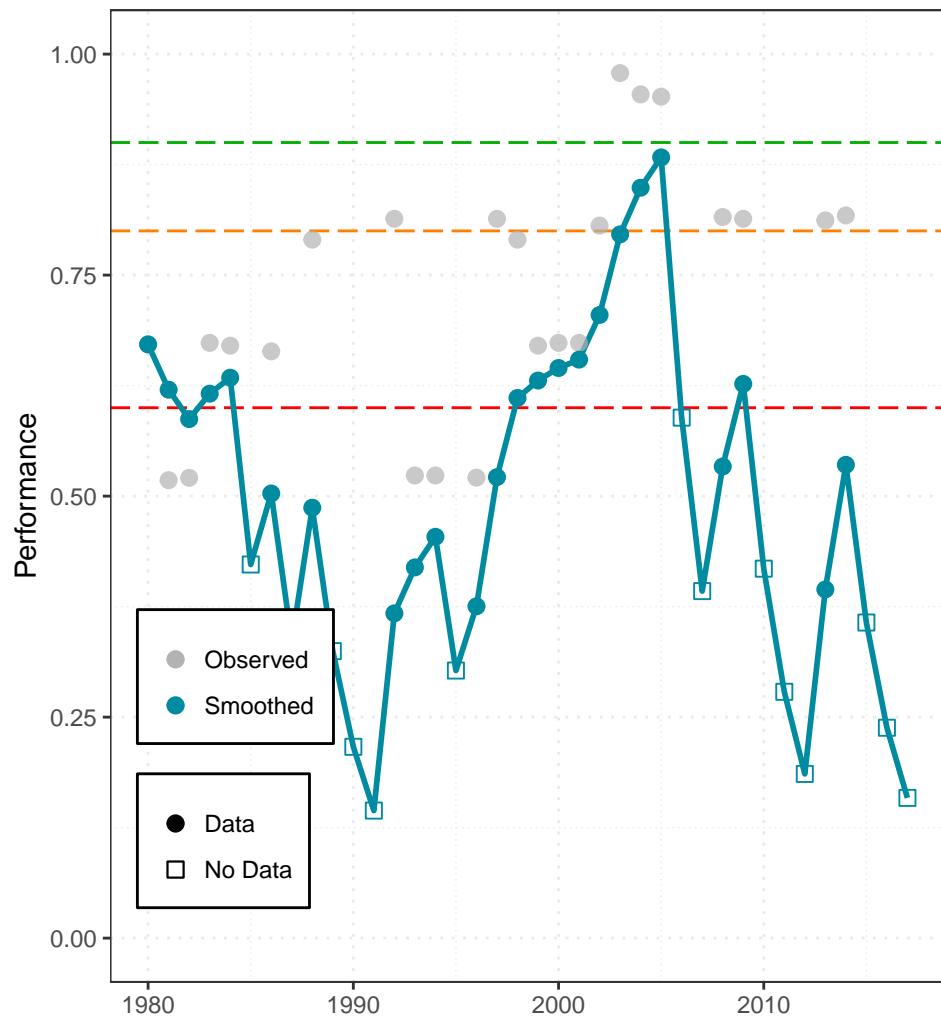

Completeness

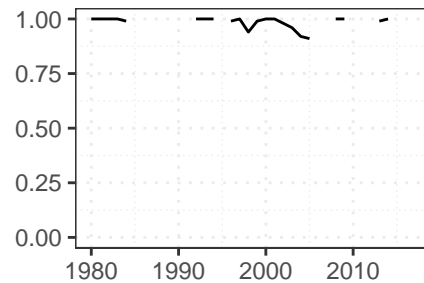

Age Unspecified

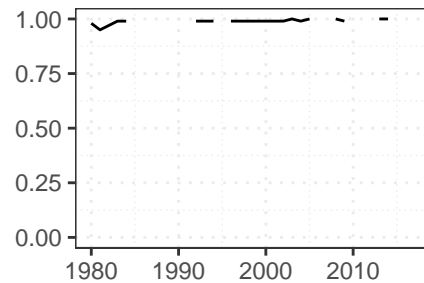

Sex Unspecified

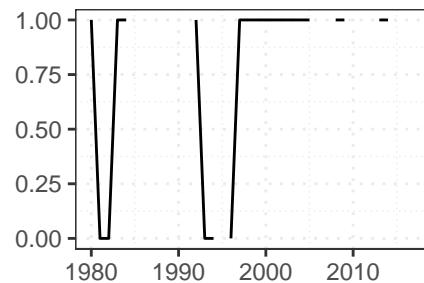

Birth Order Unspecified

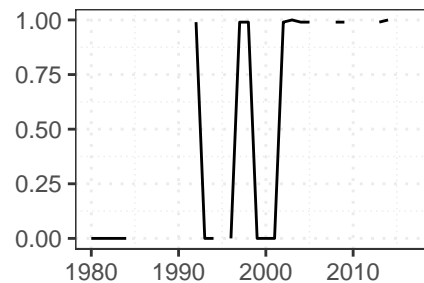

Birth Weight Unspecified

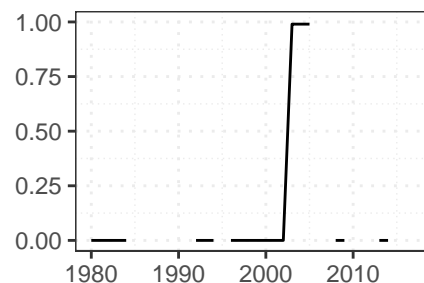

# Venezuela

## VSPI-B

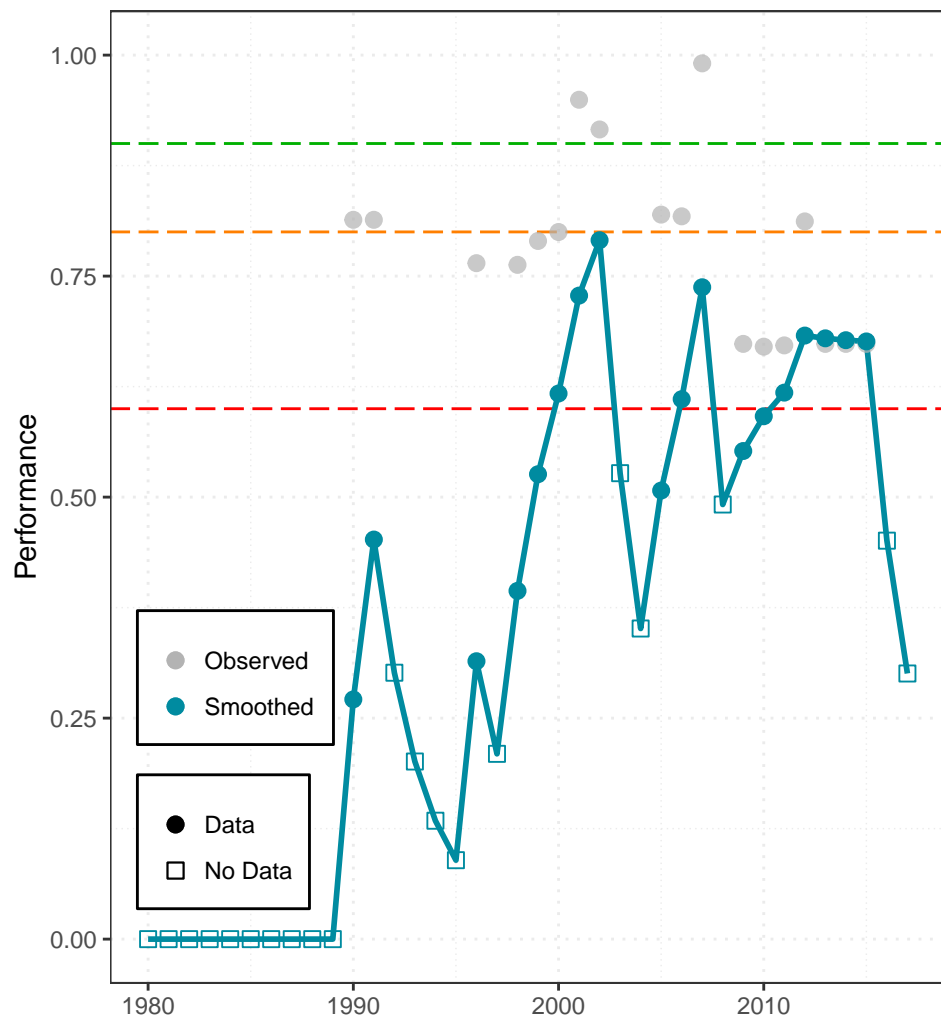

# Completeness

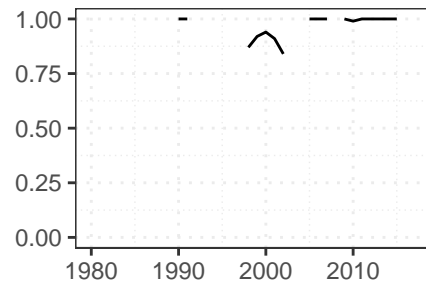

# Age Unspecified

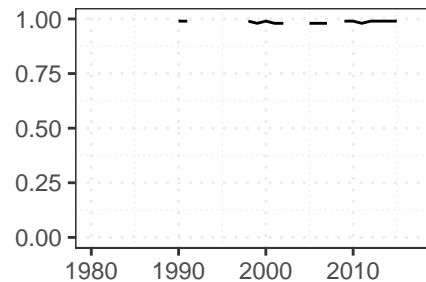

# Sex Unspecified

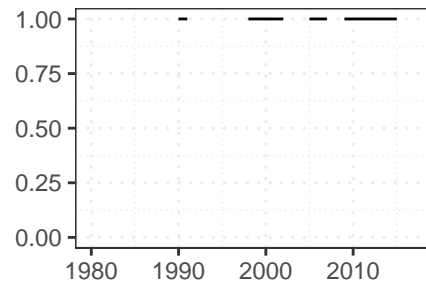

# Birth Order Unspecified

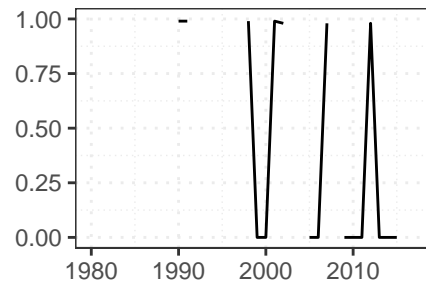

# Birth Weight Unspecified

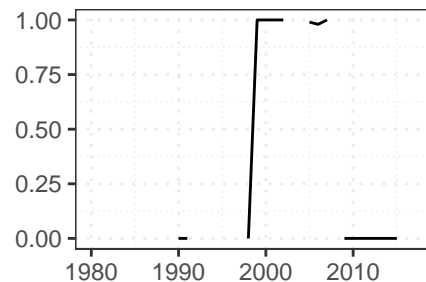

# Samoa

## VSPI-B

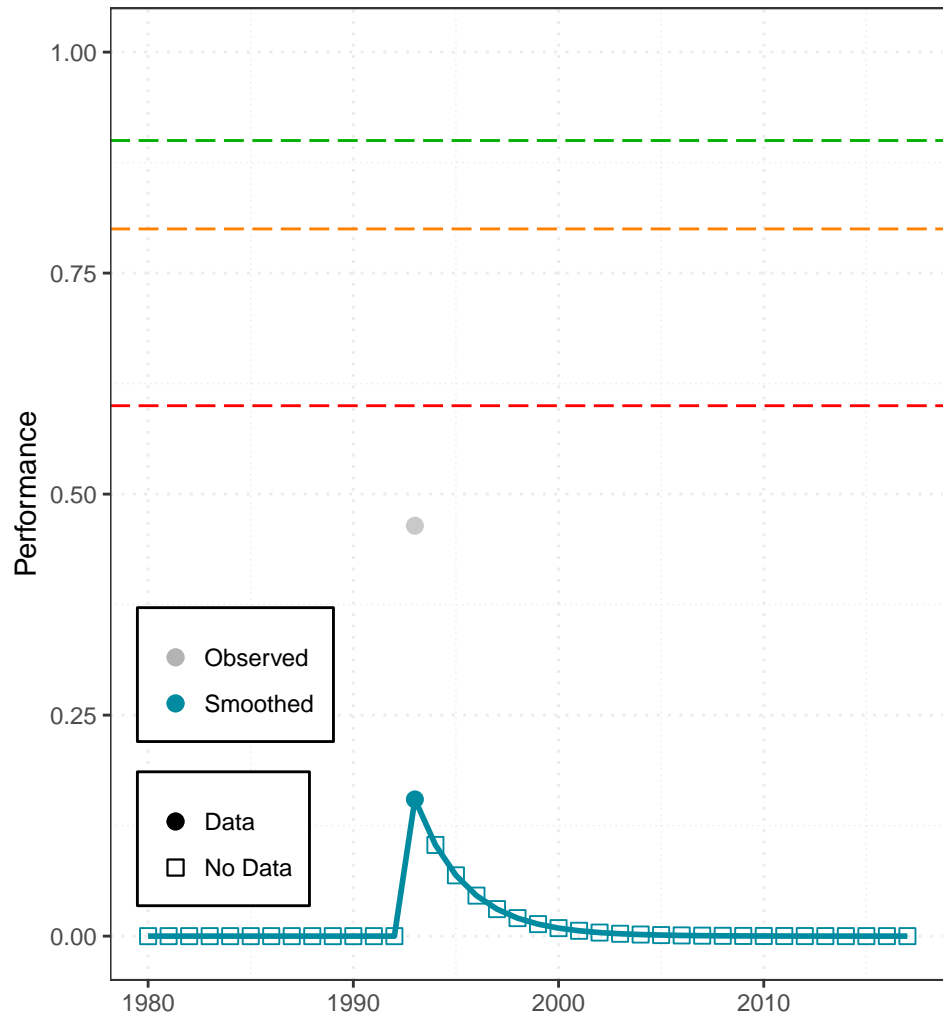

## Completeness

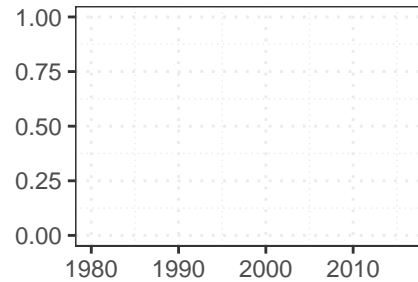

## Age Unspecified

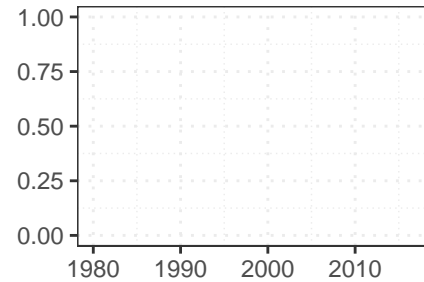

## Sex Unspecified

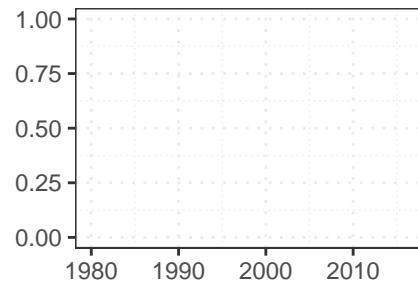

## Birth Order Unspecified

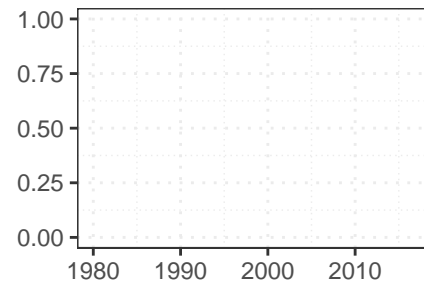

## Birth Weight Unspecified

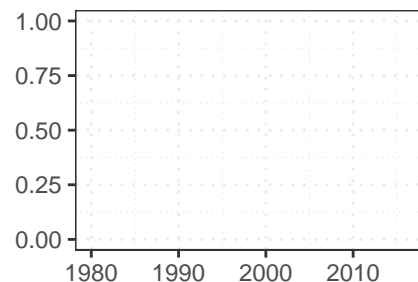

# South Africa

VSPI-B

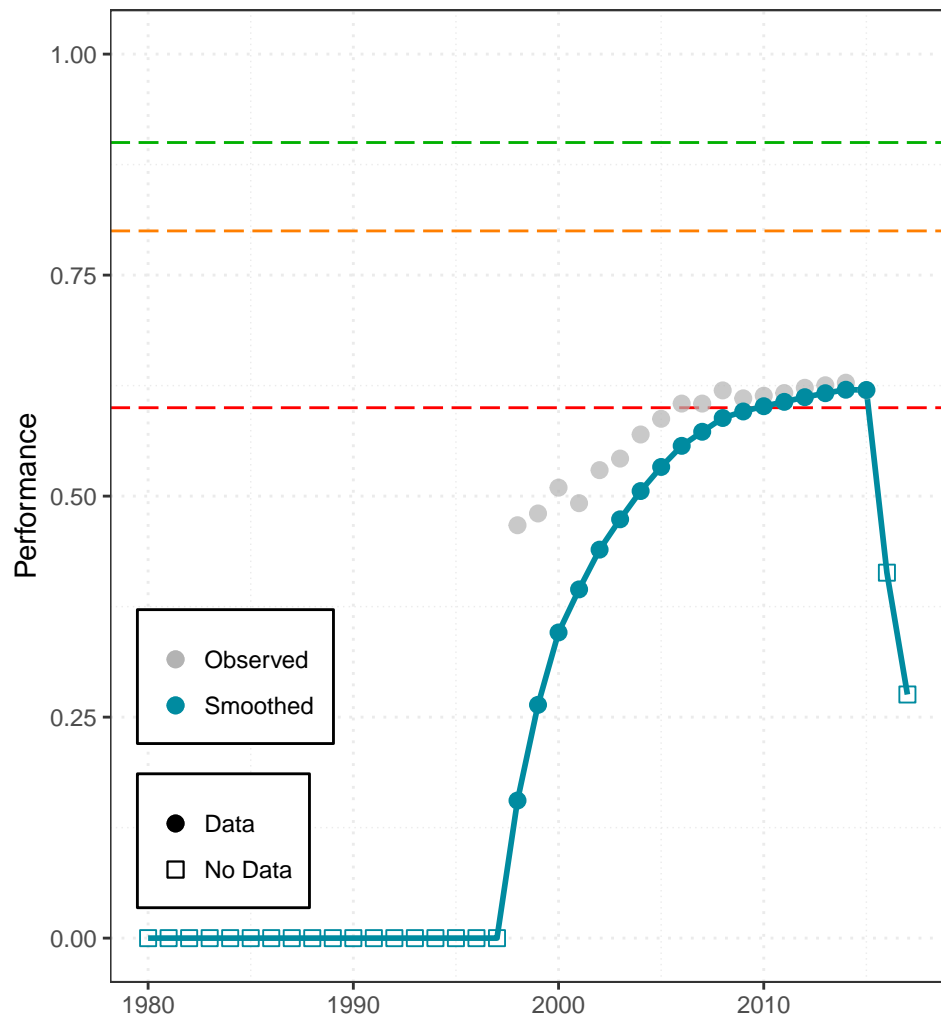

## Completeness

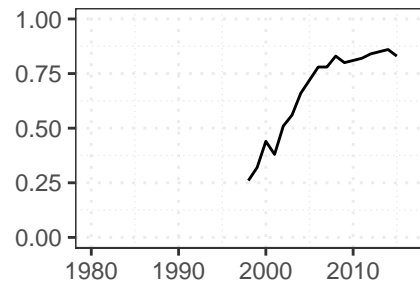

## Age Unspecified

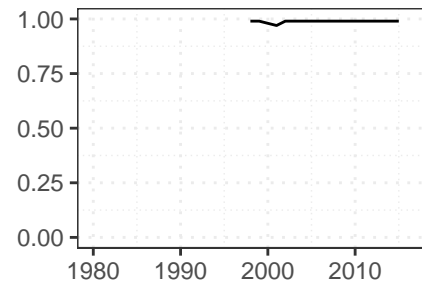

## Sex Unspecified

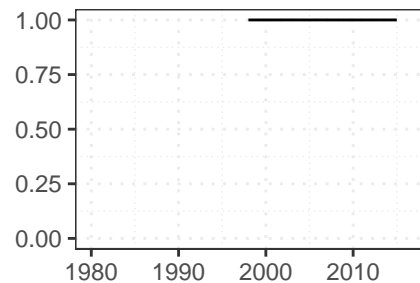

## Birth Order Unspecified

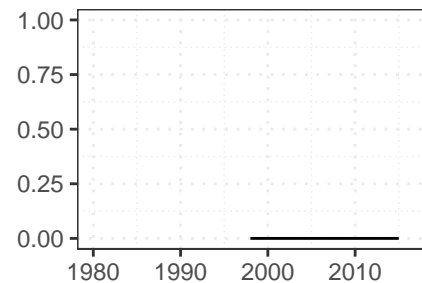

## Birth Weight Unspecified

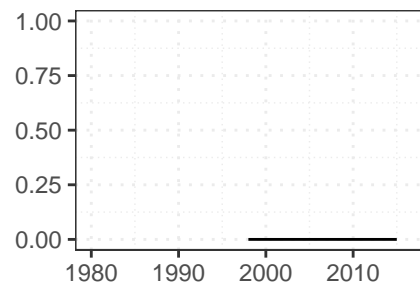

Supplement: MOESM2 [file 16359774]
