# Supplementary material for: How useful are registered birth statistics for health and social policy? A global systematic assessment of the availability and quality of birth registration data
Source: Springer Nature journal article supplement (doi:10.1186/s12963-018-0180-6), 2018-12-01
Supplement: MOESM3 [file 16359774]

# Simulated ASPBF Accuracy Associated with Each Indicator

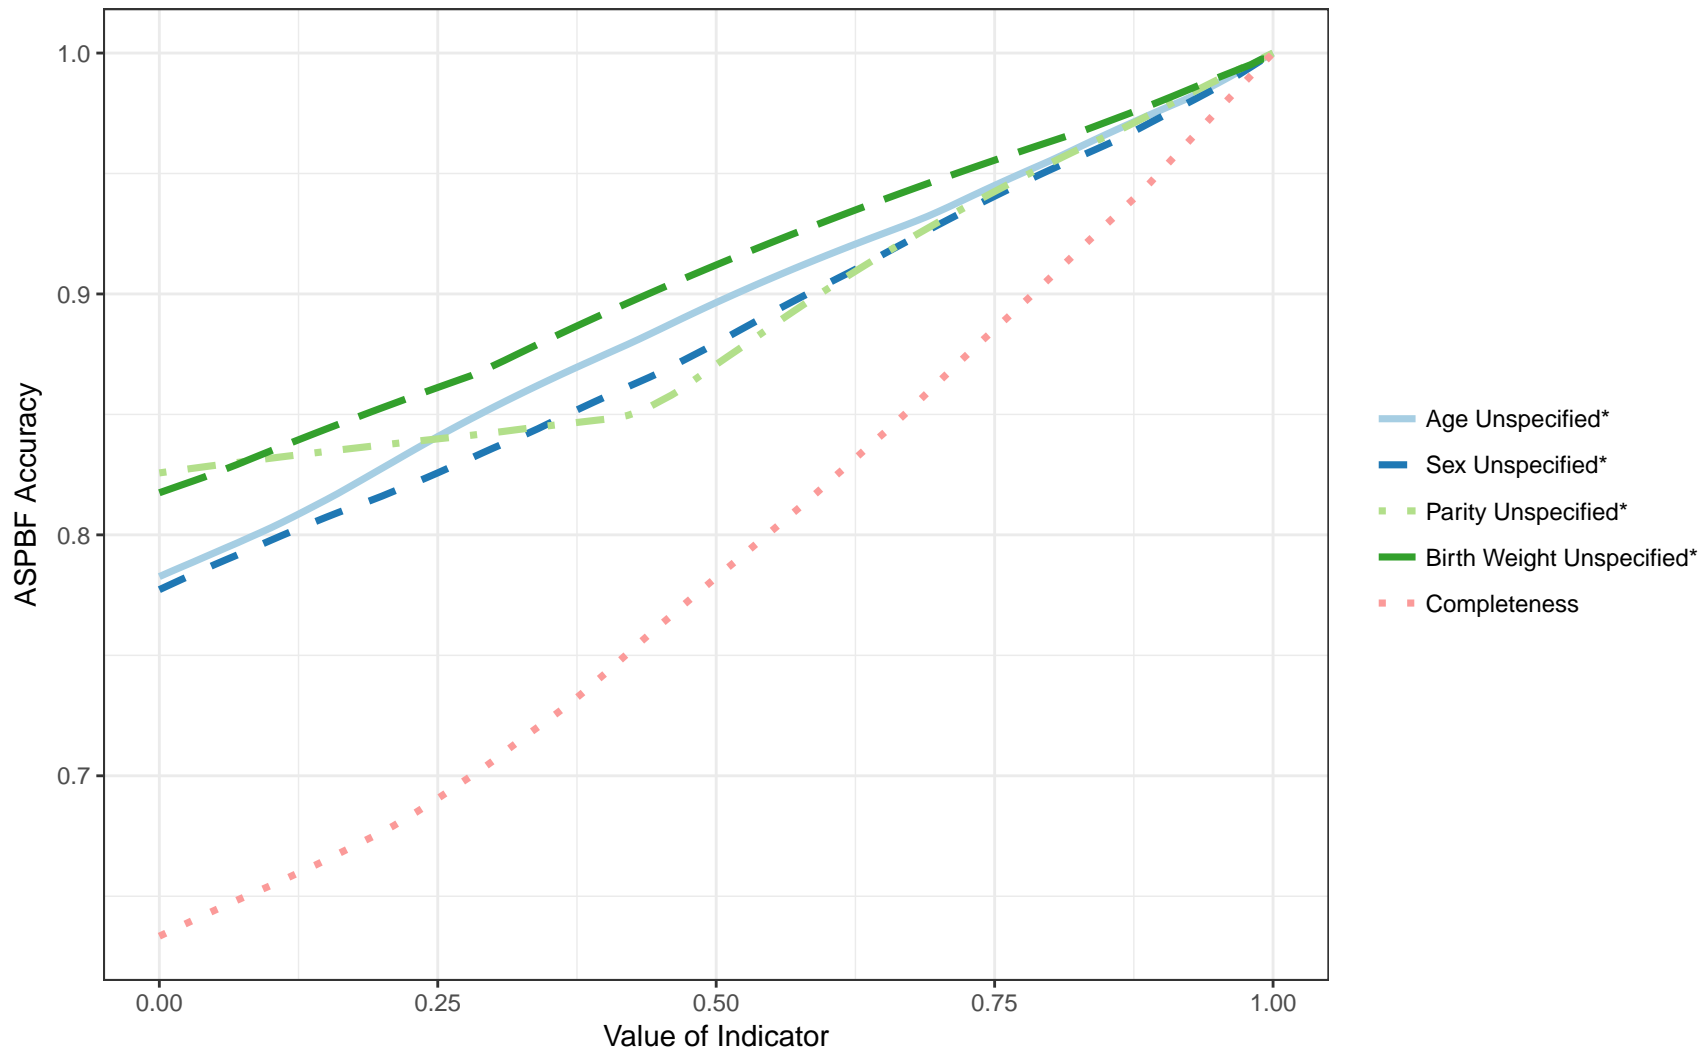

\*Subtracted from one so that higher values are preferable to lower, as with other indicators
